# Supplementary material for: Hydrogen Bonds Stabilize Chloroselenite Anions: Crystal Structure of a New Salt and Donor-Acceptor Bonding to SeO2
Source: MDPI journal article supplement (doi:10.3390/molecules28227489), 2023-11-08
Supplement: s1 [file s1]

# Hydrogen Bonds Stabilize Chloroselenite Anions: Crystal Structure of a New Salt and Donor-Acceptor Bonding to SeO<sub>2</sub>

René T. Boéré

## Supplementary Materials

| <u>Table of Contents</u>                                                         | <u>Page</u> |
|----------------------------------------------------------------------------------|-------------|
| 1. Structure Information on [Me <sub>4</sub> N][ClSeO <sub>2</sub> ]             | S2          |
| 2. Further information on <b>2</b> and the anion ClSeO <sub>2</sub> <sup>-</sup> | S3          |
| 3. Full Crystal Structure Report for the salt <b>2</b>                           | S4          |
| 4. Additional References for the Supplementary Information                       | S8          |

## 1. Structure Information on [Me<sub>4</sub>N][ClSeO<sub>2</sub>]

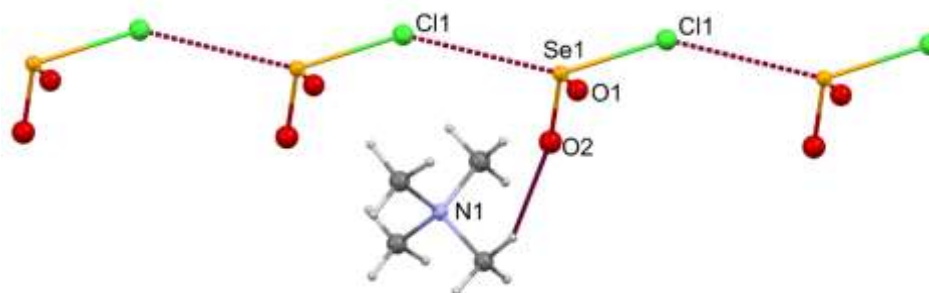

**Figure S1.** A representation (ball & stick model) of the crystal structure of [Me<sub>4</sub>N][ClSeO<sub>2</sub>] (CSD refcode BIRHOZ). The atom coordinates were communicated personally by Prof. B. Krebs [S1].

The lattice for [Me<sub>4</sub>N][ClSeO<sub>2</sub>] (Figure S1) consists of columns of catenated ClSeO<sub>2</sub><sup>−</sup> anions that are weakly bridged, with each one also weakly (non-classical) H-bonded to a methyl group of the cation. The chains align with the unit cell *a* axis (Figure S2). The two Se–O bonds are equivalent in length within statistical certainty but not symmetry-equivalent. The ‘bonded’ Se–Cl length at 2.453(1) Å is 14% longer than the sums of covalent radii, but 1.197 Å (33%) less than the sums of van der Waals’ radii. The ‘bridging’ Se–Cl length at 3.369(2) Å is 60% longer than the sums of covalent radii, but only 0.281 Å (7.7%) less than the sums of van der Waals’ radii. Hence, this is a relatively weak intermolecular contact, quite similar to and even slightly shorter than, the inter-anion contacts found in the crystal structure of **2** in our work. In the structure of K[FSeO<sub>2</sub>], which displays a quite similar extended chain with short ‘bonds’ and longer ‘contacts’, the former are 47% <  $\sum r_{vdW}$  while the latter are as much as 16% <  $\sum r_{vdW}$  [54]. So it is a bridged structure, making it formally of type **C**, but the bridges are so weak that it remains *effectively* type **A**, as we have described in the Article. By corollary, the bridging O⋯Se and Cl⋯Se contacts in **2** should not be expected to significantly affect the bonding in the anion.

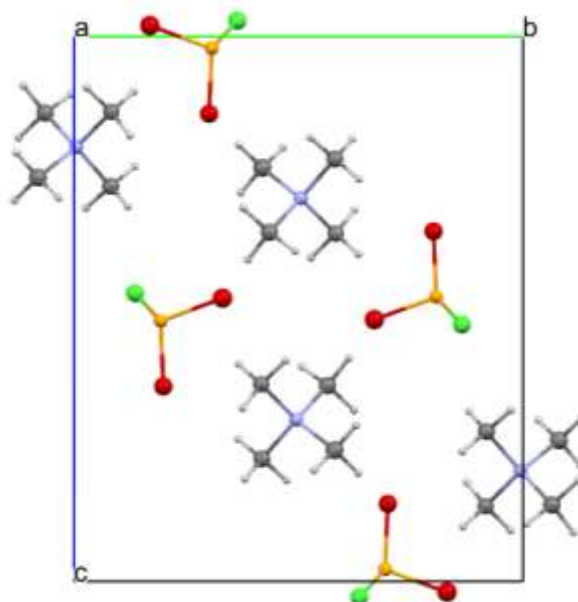

**Figure S2.** Packing diagram viewed down the *a* direction.

We thank Prof. Dr. B. Krebs for personal communication of the atom coordinates and other structure details that remain unpublished for [Me<sub>4</sub>N][ClSeO<sub>2</sub>], see ref [S1].

## 2. Further information on **2** and the anion $\text{ClSeO}_2^-$

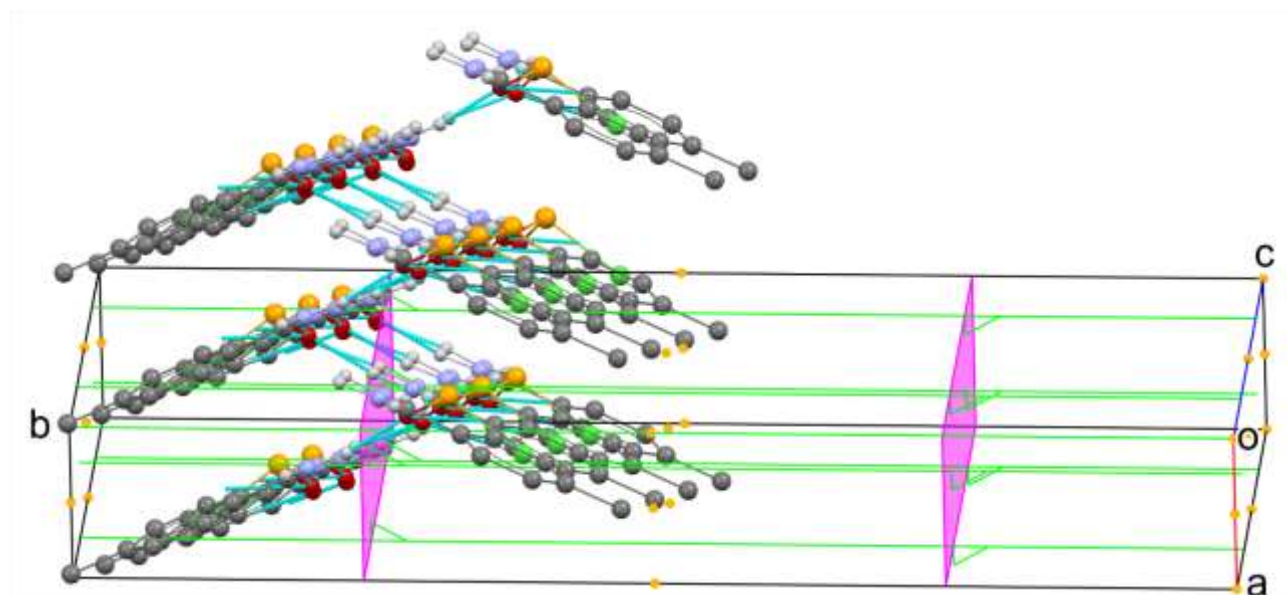

**Figure S3.** Ball and stick model of the crystal structure of **2** showing the unit cell, lattice symmetry elements and the ‘inverted V’ or roofline structure of the H-bonded nets. The view is down the bifurcator of bifurcator of  $\angle ac$ . By inversion symmetry, an opposite ‘V’ stack is found at the r.h.s. to complete the unit cell filling.

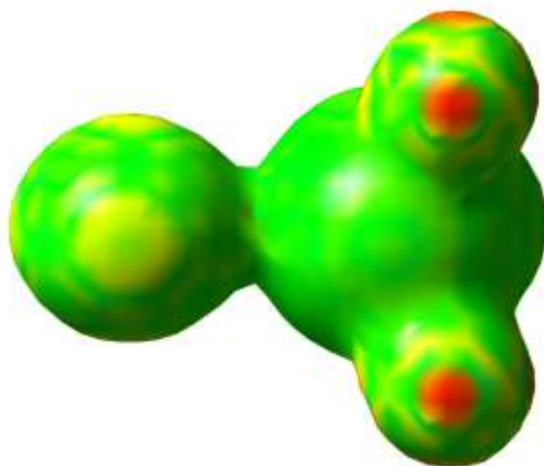

**Figure S4.** Electrostatic potential surface (ESP) at 0.001 A.U. The rather featureless surface shows both the weak overlap between Cl (at left) and the  $\text{SeO}_2$  moiety (at right) and the negative charge accumulation a O consistent with the dual H-bond acceptor role of each O in the H-bonded net (Figures 3 and S3).

### 3. Full Crystal Structure Report for the salt 2

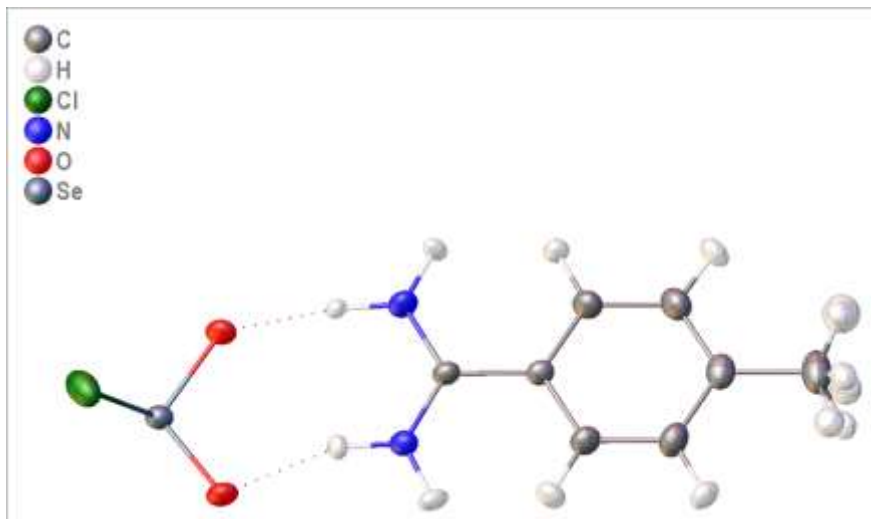

**Table S1 Crystal data and structure refinement for 2.**

|                                             |                                                                   |
|---------------------------------------------|-------------------------------------------------------------------|
| Identification code                         | let0507b                                                          |
| Empirical formula                           | C <sub>8</sub> H <sub>11</sub> ClN <sub>2</sub> O <sub>2</sub> Se |
| Formula weight                              | 281.601                                                           |
| Temperature/K                               | 193.15                                                            |
| Crystal system                              | monoclinic                                                        |
| Space group                                 | P2 <sub>1</sub> /c                                                |
| a/Å                                         | 3.9773(3)                                                         |
| b/Å                                         | 28.477(2)                                                         |
| c/Å                                         | 9.5781(9)                                                         |
| α/°                                         | 90                                                                |
| β/°                                         | 91.242(1)                                                         |
| γ/°                                         | 90                                                                |
| Volume/Å <sup>3</sup>                       | 1084.56(16)                                                       |
| Z                                           | 4                                                                 |
| ρ <sub>calc</sub> /cm <sup>3</sup>          | 1.725                                                             |
| μ/mm <sup>-1</sup>                          | 3.685                                                             |
| F(000)                                      | 560.8                                                             |
| Crystal size/mm <sup>3</sup>                | 0.36 × 0.3 × 0.12                                                 |
| Radiation                                   | Mo Kα (λ = 0.71073)                                               |
| 2θ range for data collection/°              | 4.48 to 52.84                                                     |
| Index ranges                                | -4 ≤ h ≤ 4, -35 ≤ k ≤ 35, -11 ≤ l ≤ 11                            |
| Reflections collected                       | 8245                                                              |
| Independent reflections                     | 2194 [R <sub>int</sub> = 0.0328, R <sub>sigma</sub> = 0.0282]     |
| Data/restraints/parameters                  | 2194/149/253                                                      |
| Goodness-of-fit on F <sup>2</sup>           | 1.106                                                             |
| Final R indexes [I ≥ 2σ (I)]                | R <sub>1</sub> = 0.0340, wR <sub>2</sub> = 0.0807                 |
| Final R indexes [all data]                  | R <sub>1</sub> = 0.0394, wR <sub>2</sub> = 0.0829                 |
| Largest diff. peak/hole / e Å <sup>-3</sup> | 1.06/-0.76                                                        |

**Table S2 Fractional Atomic Coordinates ( $\times 10^4$ ) and Equivalent Isotropic Displacement Parameters ( $\text{\AA}^2 \times 10^3$ ) for 2.  $U_{eq}$  is defined as 1/3 of the trace of the orthogonalised  $U_{ij}$  tensor.**

| Atom | x           | y           | z           | U(eq)      |
|------|-------------|-------------|-------------|------------|
| Se1  | -3968.1 (8) | 6691.0 (1)  | 8440.2 (3)  | 24.03 (12) |
| Cl1  | -954 (2)    | 6041.4 (3)  | 7710.5 (11) | 44.7 (2)   |
| O1   | -1158 (6)   | 6950.2 (8)  | 9462 (2)    | 32.4 (5)   |
| O2   | -4109 (6)   | 7008.3 (8)  | 7025 (2)    | 34.4 (5)   |
| N1   | 1940 (8)    | 7864.1 (10) | 9533 (3)    | 33.0 (6)   |
| N2   | -263 (7)    | 7889.0 (9)  | 7321 (3)    | 27.8 (6)   |
| C1   | 1489 (7)    | 8091.1 (11) | 8338 (3)    | 22.4 (6)   |
| C2   | 2921 (7)    | 8562.3 (10) | 8138 (3)    | 22.4 (6)   |
| C3   | 2929 (9)    | 8767.9 (12) | 6806 (3)    | 30.2 (7)   |
| C4   | 4267 (9)    | 9211.1 (13) | 6621 (4)    | 36.9 (8)   |
| C5   | 5698 (8)    | 9461.5 (12) | 7736 (4)    | 34.8 (8)   |
| C6   | 5693 (10)   | 9256.4 (13) | 9055 (4)    | 39.8 (8)   |
| C7   | 4334 (9)    | 8814.7 (12) | 9253 (3)    | 33.7 (7)   |
| C8   | 7120 (11)   | 9942.2 (14) | 7519 (5)    | 49.6 (10)  |

**Table S3 Anisotropic Displacement Parameters ( $\text{\AA}^2 \times 10^3$ ) for 2. The Anisotropic displacement factor exponent takes the form:  $-2\pi^2[h^2a^{*2}U_{11}+2hka^*b^*U_{12}+\dots]$ .**

| Atom | U <sub>11</sub> | U <sub>22</sub> | U <sub>33</sub> | U <sub>12</sub> | U <sub>13</sub> | U <sub>23</sub> |
|------|-----------------|-----------------|-----------------|-----------------|-----------------|-----------------|
| Se1  | 25.49 (18)      | 27.28 (18)      | 19.18 (17)      | -0.38 (12)      | -2.45 (11)      | -0.01 (12)      |
| Cl1  | 39.9 (5)        | 31.5 (4)        | 62.2 (6)        | 4.3 (4)         | -10.0 (4)       | -14.6 (4)       |
| O1   | 47.2 (15)       | 30.8 (12)       | 18.6 (10)       | -3.5 (10)       | -10.0 (9)       | -2.7 (9)        |
| O2   | 48.2 (15)       | 34.2 (12)       | 20.3 (11)       | -3.0 (10)       | -12.2 (10)      | 4.0 (9)         |
| N1   | 50.0 (18)       | 30.8 (15)       | 18.1 (13)       | -6.0 (13)       | -6.3 (12)       | 3.6 (11)        |
| H1a  | 42 (15)         | 48 (16)         | 17 (9)          | -14 (7)         | 2 (5)           | -1 (5)          |
| H1b  | 38 (15)         | 28 (7)          | 21 (16)         | 0 (4)           | -3 (8)          | 2 (4)           |
| N2   | 37.3 (16)       | 25.3 (14)       | 20.6 (13)       | -0.8 (12)       | -6.0 (11)       | -0.8 (10)       |
| H2a  | 56 (19)         | 64 (18)         | 34 (7)          | -1 (8)          | -10 (5)         | 19 (5)          |
| H2b  | 45 (17)         | 27 (6)          | 35 (17)         | -3 (4)          | 0 (8)           | -2 (4)          |
| C1   | 28.7 (16)       | 24.1 (15)       | 14.4 (13)       | 1.3 (12)        | -1.0 (11)       | 0.0 (11)        |
| C2   | 26.5 (15)       | 25.3 (15)       | 15.4 (14)       | 0.7 (12)        | 2.0 (11)        | 0.3 (11)        |
| C3   | 39.3 (18)       | 30.7 (17)       | 20.6 (15)       | -1.9 (14)       | 1.1 (12)        | 2.2 (12)        |
| H3   | 60 (16)         | 58 (16)         | 33 (10)         | -12 (7)         | -3 (5)          | -10 (5)         |
| C4   | 47 (2)          | 30.0 (17)       | 33.6 (18)       | -3.3 (15)       | 2.9 (15)        | 6.8 (14)        |
| H4   | 69 (18)         | 55 (17)         | 40 (6)          | -2 (8)          | 3 (4)           | 17 (4)          |
| C5   | 31.5 (18)       | 28.3 (17)       | 45 (2)          | 0.5 (14)        | 4.5 (14)        | 2.1 (15)        |
| C6   | 49 (2)          | 31.2 (18)       | 39 (2)          | -5.6 (15)       | -9.3 (16)       | -4.7 (15)       |
| H6   | 55 (17)         | 58 (15)         | 46 (11)         | -15 (7)         | -5 (6)          | -16 (6)         |
| C7   | 47 (2)          | 29.3 (17)       | 24.8 (16)       | -4.4 (15)       | -7.4 (14)       | -2.4 (13)       |
| H7   | 68 (18)         | 45 (16)         | 29 (6)          | -10 (8)         | -9 (4)          | 3 (4)           |
| C8   | 44 (2)          | 31 (2)          | 74 (3)          | -4.2 (17)       | 2 (2)           | 3 (2)           |
| H8a  | 90 (30)         | 90 (30)         | 100 (30)        | -1 (9)          | 2 (9)           | 0 (9)           |
| H8b  | 50 (30)         | 50 (30)         | 60 (30)         | 0 (9)           | -1 (9)          | -4 (9)          |

**Table S3 Anisotropic Displacement Parameters ( $\text{\AA}^2 \times 10^3$ ) for 2. The Anisotropic displacement factor exponent takes the form:  $-2\pi^2[h^2a^{*2}U_{11}+2hka^*b^*U_{12}+\dots]$ .**

| Atom | U <sub>11</sub> | U <sub>22</sub> | U <sub>33</sub> | U <sub>12</sub> | U <sub>13</sub> | U <sub>23</sub> |
|------|-----------------|-----------------|-----------------|-----------------|-----------------|-----------------|
| H8c  | 50 (30)         | 40 (20)         | 50 (30)         | 0 (9)           | -1 (9)          | -7 (9)          |
| H8d  | 60 (30)         | 60 (30)         | 60 (30)         | 0 (9)           | 3 (9)           | -2 (9)          |
| H8e  | 30 (20)         | 50 (20)         | 40 (20)         | -1 (9)          | 2 (9)           | 3 (9)           |
| H8f  | 60 (30)         | 60 (30)         | 60 (30)         | 1 (9)           | 1 (9)           | 3 (9)           |

**Table S4 Bond Distances for 2.**

| Atoms    | Length/ $\text{\AA}$ | Atoms      | Length/ $\text{\AA}$ |
|----------|----------------------|------------|----------------------|
| Se1–Cl1  | 2.3202 (9)           | O1–Se1–Cl1 | 100.86 (9)           |
| Se1–O1   | 1.645 (2)            | O2–Se1–Cl1 | 101.55 (9)           |
| Se1–O2   | 1.629 (2)            | O2–Se1–O1  | 104.90 (11)          |
| N1–C1    | 1.323 (4)            | N2 C1 N1   | 119.1 (3)            |
| N2–C1    | 1.317 (4)            | C2 C1 N1   | 120.8 (3)            |
| C1–C2    | 1.472 (4)            | C2 C1 N2   | 120.1 (3)            |
| C2–C3    | 1.404 (4)            | C7 C2 C3   | 118.1 (3)            |
| C2–C7    | 1.395 (4)            | C4 C3 C2   | 120.4 (3)            |
| C3–C4    | 1.382 (5)            | C5 C4 C3   | 121.3 (3)            |
| C4–C5    | 1.395 (5)            | C6 C5 C4   | 118.1 (3)            |
| C5–C6    | 1.392 (5)            | C8 C5 C4   | 120.7 (3)            |
| C5–C8    | 1.497 (5)            | C8 C5 C6   | 121.2 (3)            |
| C6–C7    | 1.384 (5)            | C7 C2 C1   | 121.4 (3)            |
| C3–C2–C1 | 120.5 (3)            | C7 C6 C5   | 120.9 (3)            |

**Table S5 Bond Angles for 2.**

| Atom Atom Atom | Angle/ $^\circ$ | Atom Atom Atom | Angle/ $^\circ$ |
|----------------|-----------------|----------------|-----------------|
| O1 Se1 Cl1     | 100.86(9)       | C7 C2 C3       | 118.2(3)        |
| O2 Se1 Cl1     | 101.56(9)       | C4 C3 C2       | 120.4(3)        |
| O2 Se1 O1      | 104.90(11)      | C5 C4 C3       | 121.4(3)        |
| N2 C1 N1       | 119.1(3)        | C6 C5 C4       | 118.2(3)        |
| C2 C1 N1       | 120.8(3)        | C8 C5 C4       | 120.7(3)        |
| C2 C1 N2       | 120.1(3)        | C8 C5 C6       | 121.1(4)        |
| C3 C2 C1       | 120.5(3)        | C7 C6 C5       | 120.9(3)        |
| C7 C2 C1       | 121.4(3)        | C6 C7 C2       | 121.0(3)        |

**Table S6 Hydrogen Bonds for 2.**

| D  | H   | A               | d(D–H)/ $\text{\AA}$ | d(H–A)/ $\text{\AA}$ | d(D–A)/ $\text{\AA}$ | D–H–A/ $^\circ$ |
|----|-----|-----------------|----------------------|----------------------|----------------------|-----------------|
| N1 | H1a | O2 <sup>1</sup> | 1.045 (17)           | 1.90 (3)             | 2.852 (3)            | 150 (3)         |
| N1 | H1b | O1              | 1.051 (18)           | 1.843 (19)           | 2.880 (4)            | 168 (3)         |
| N2 | H2a | O1 <sup>2</sup> | 1.030 (17)           | 1.83 (3)             | 2.792 (3)            | 153 (4)         |

<sup>1</sup>1+X,3/2–Y,1/2+Z; <sup>2</sup>+X,3/2–Y,-1/2+Z

**Table S7 Torsion Angles for 2.**

| A  | B  | C  | D  | Angle/°   | A  | B  | C  | D  | Angle/°    |
|----|----|----|----|-----------|----|----|----|----|------------|
| N1 | C1 | C2 | C3 | 169.2 (3) | C2 | C3 | C4 | C5 | 1.3 (4)    |
| N1 | C1 | C2 | C7 | -10.1 (4) | C2 | C7 | C6 | C5 | -0.2 (4)   |
| N2 | C1 | C2 | C3 | -10.7 (4) | C3 | C4 | C5 | C6 | -1.1 (4)   |
| N2 | C1 | C2 | C7 | 170.0 (3) | C3 | C4 | C5 | C8 | -179.7 (4) |
| C1 | C2 | C3 | C4 | 179.8 (3) | C4 | C5 | C6 | C7 | 0.6 (4)    |
| C1 | C2 | C7 | C6 | 179.6 (3) |    |    |    |    |            |

**Table S8 Hydrogen Atom Coordinates ( $\text{\AA} \times 10^4$ ) and Isotropic Displacement Parameters ( $\text{\AA}^2 \times 10^3$ ) for 2.**

| Atom | x           | y          | z          | U(eq)   |
|------|-------------|------------|------------|---------|
| H1a  | 3150 (90)   | 8027 (13)  | 10380 (30) | 36 (9)  |
| H1b  | 750 (90)    | 7537 (9)   | 9650 (40)  | 29 (9)  |
| H2a  | -780 (110)  | 8048 (16)  | 6370 (30)  | 52 (11) |
| H2b  | -1240 (100) | 7551 (8)   | 7380 (40)  | 36 (9)  |
| H3   | 1810 (100)  | 8584 (13)  | 5920 (30)  | 50 (10) |
| H4   | 4130 (110)  | 9354 (14)  | 5580 (20)  | 54 (10) |
| H6   | 6820 (100)  | 9462 (13)  | 9890 (30)  | 53 (10) |
| H7   | 4350 (100)  | 8676 (13)  | 10320 (20) | 48 (9)  |
| H8a  | 8100 (200)  | 10080 (30) | 8500 (50)  | 90 (30) |
| H8b  | 9130 (150)  | 9960 (30)  | 6770 (70)  | 50 (20) |
| H8c  | 5240 (140)  | 10190 (20) | 7140 (80)  | 50 (20) |
| H8d  | 5500 (170)  | 10220 (20) | 7850 (90)  | 60 (20) |
| H8e  | 9660 (80)   | 9960 (30)  | 7940 (70)  | 39 (18) |
| H8f  | 7400 (200)  | 9950 (30)  | 6392 (16)  | 60 (20) |

**Table S9 Atomic Occupancy for 2.**

| Atom | Occupancy | Atom | Occupancy | Atom | Occupancy |
|------|-----------|------|-----------|------|-----------|
| H8a  | 0.500000  | H8b  | 0.500000  | H8c  | 0.500000  |
| H8d  | 0.500000  | H8e  | 0.500000  | H8f  | 0.500000  |

## Experimental

Single crystals of  $\text{C}_8\text{H}_{11}\text{ClN}_2\text{O}_2\text{Se}$  **2** were grown from acetonitrile at  $-30^\circ\text{C}$ . A suitable crystal was selected and mounted on a fine glass capillary with Paratone oil and placed on a Bruker PLATFORM on a Smart 1000 CCD area detector diffractometer. The crystal was kept at 193.15 K during data collection. Using Olex2 [S2], the structure was solved with the SHELXS [S3] structure solution program using Direct Methods and refined with the olex2.refine [S4] refinement package using Gauss-Newton minimization. Refinement using NoSpherA2, an implementation of NON-SPHERical Atom-form-factors in Olex2 [S5]. NoSpherA2 implementation of HAR makes use of tailor-made aspherical atomic form factors calculated on-the-fly from a Hirshfeld-partitioned electron density (ED) - not from spherical-atom form factors.

The ED is calculated from a gaussian basis set single determinant SCF wavefunction - either Hartree-Fock or DFT using selected functionals - for a fragment of the crystal. This fragment can be embedded in an electrostatic crystal field by employing cluster charges or modelled using implicit solvation models, depending on the software used.

The following options were used:

SOFTWARE: ORCA 5.0  
PARTITIONING: NoSpherA2  
INT ACCURACY: Normal  
METHOD: R2SCAN  
BASIS SET: def2-TZVP  
CHARGE: 0  
MULTIPLICITY: 1  
DATE: 2023-10-04\_04-28-11

## Refinement model description

Number of restraints - 149, number of constraints - 0.

Details:

### 1. Restrained distances

C7-H7 = C3-H3 = C4-H4 = C6-H6

1.085 with sigma of 0.02

N1-H1b = N2-H2b = N2-H2a = N1-H1a

1.04 with sigma of 0.02

C8-H8c  $\approx$  C8-H8d  $\approx$  C8-H8a  $\approx$  C8-H8e  $\approx$  C8-H8b  $\approx$  C8-H8f

with sigma of 0.01

H8a-H8b  $\approx$  H8a-H8c  $\approx$  H8b-H8c

with sigma of 0.04

H8a-H8b  $\approx$  H8a-H8c  $\approx$  H8b-H8c

with sigma of 0.04

H8d-H8e  $\approx$  H8d-H8f  $\approx$  H8e-H8f

with sigma of 0.04

### 2. Uiso/Uanis restraints and constraints

H8b  $\approx$  H8f  $\approx$  H8c  $\approx$  H8d  $\approx$  H8a  $\approx$  H8e: within 2A with sigma of

0.04 and sigma for terminal atoms of 0.08 within 2A

Uanis(H8e)  $\approx$  Ueq, Uanis(H8b)  $\approx$  Ueq, Uanis(H8f)  $\approx$  Ueq, Uanis(H8c)

$\approx$  Ueq, Uanis(H8a)  $\approx$  Ueq, Uanis(H8d)  $\approx$  Ueq: with sigma of 0.01 and

sigma for terminal atoms of 0.02

Uanis(H1b)  $\approx$  Ueq, Uanis(H1a)  $\approx$  Ueq, Uanis(H2b)  $\approx$  Ueq, Uanis(H2a)

$\approx$  Ueq: with sigma of 0.01 and sigma for terminal atoms of 0.02

Uanis(H7)  $\approx$  Ueq, Uanis(H3)  $\approx$  Ueq, Uanis(H4)  $\approx$  Ueq, Uanis(H6)  $\approx$

Ueq: with sigma of 0.01 and sigma for terminal atoms of 0.02

### 3. Rigid body (RIGU) restrains

C7, H7

with sigma for 1-2 distances of 0.004 and sigma for 1-3 distances of 0.004

C6, H6

with sigma for 1-2 distances of 0.004 and sigma for 1-3 distances of 0.004

C3, H3

with sigma for 1-2 distances of 0.004 and sigma for 1-3 distances of 0.004

C4, H4

with sigma for 1-2 distances of 0.004 and sigma for 1-3 distances of 0.004

N2, H2a

with sigma for 1-2 distances of 0.004 and sigma for 1-3 distances of 0.004

N2, H2b

with sigma for 1-2 distances of 0.004 and sigma for 1-3 distances of 0.004

N1, H1a

with sigma for 1-2 distances of 0.004 and sigma for 1-3 distances of 0.004

N1, H1b

with sigma for 1-2 distances of 0.004 and sigma for 1-3 distances of 0.004

### 4. Others

Fixed Sof: H8a(0.5) H8b(0.5) H8c(0.5) H8d(0.5) H8e(0.5) H8f(0.5)

This report has been created with Olex2, compiled on 2023.08.24 svn.re1ec1418 for OlexSys. Please [let us know](#) if there are any errors or if you would like to have additional features.



#### 4. Additional references for the Supplementary Information

- S1 Schäffer, A, Ph.D. Thesis, Univ. of Münster, **1984** (via private communication from Prof. Dr. B. Krebs).
- S2 Dolomanov, O.V., Bourhis, L.J., Gildea, R.J., Howard, J.A.K. & Puschmann, H. *J. Appl. Cryst.* **2009**, *42*, 339-341.
- S3 Sheldrick, G.M. *Acta Cryst.* **2008**, *A64*, 112-122.
- S4 Bourhis, L.J., Dolomanov, O.V., Gildea, R.J., Howard, J.A.K., Puschmann, H. *Acta Cryst.* **2015**, *A71*, 59-75.
- S5 Kleemiss, F.; Dolomanov, O.V.; Bodensteiner, M.; Peyerimhoff, N.; Midgley, L.; Bourhis, L.J.; Genoni, A.; Malaspina, L.A.; Jayatilaka, D.; Spencer, J.L.; White, F.; Grundkötter-Stock, B.; Steinhauer, S.; Lentz, D.; Puschmann, H.; Grabowsky, S. Accurate crystal structures and chemical properties from NoSpherA2. *Chem. Sci.* **2021**, *12*, 1675–1692.
