# Supplementary material for: Hydrogen Bonds Stabilize Chloroselenite Anions: Crystal Structure of a New Salt and Donor-Acceptor Bonding to SeO2
Source: MDPI journal article supplement (doi:10.3390/molecules28227489), 2023-11-08
Supplement: s1 [file s1]

## checkCIF/PLATON report

Structure factors have been supplied for datablock(s) 2\_Tolylamidinium\_ClSeO2

THIS REPORT IS FOR GUIDANCE ONLY. IF USED AS PART OF A REVIEW PROCEDURE FOR PUBLICATION, IT SHOULD NOT REPLACE THE EXPERTISE OF AN EXPERIENCED CRYSTALLOGRAPHIC REFEREE.

No syntax errors found.      CIF dictionary      Interpreting this report

### Datablock: 2\_Tolylamidinium\_ClSeO2

---

Bond precision:      C-C = 0.0046 Å      Wavelength=0.71073

Cell:                      a=3.9773 (3)                      b=28.477 (2)                      c=9.5781 (9)  
                                    alpha=90                      beta=91.242 (1)                      gamma=90

Temperature:              193 K

|                        | Calculated          | Reported            |
|------------------------|---------------------|---------------------|
| Volume                 | 1084.58 (15)        | 1084.56 (16)        |
| Space group            | P 21/c              | P 1 21/c 1          |
| Hall group             | -P 2ybc             | -P 2ybc             |
| Moiety formula         | C8 H11 N2, Cl O2 Se | Cl O2 Se, C8 H11 N2 |
| Sum formula            | C8 H11 Cl N2 O2 Se  | C8 H11 Cl N2 O2 Se  |
| Mr                     | 281.60              | 281.60              |
| Dx, g cm <sup>-3</sup> | 1.725               | 1.725               |
| Z                      | 4                   | 4                   |
| Mu (mm <sup>-1</sup> ) | 3.685               | 3.685               |
| F000                   | 560.0               | 560.8               |
| F000'                  | 560.42              |                     |
| h, k, lmax             | 4, 35, 11           | 4, 35, 11           |
| Nref                   | 2198                | 2194                |
| Tmin, Tmax             | 0.276, 0.643        | 0.350, 0.666        |
| Tmin'                  | 0.255               |                     |

Correction method= # Reported T Limits: Tmin=0.350 Tmax=0.666  
AbsCorr = MULTI-SCAN

Data completeness= 0.998                      Theta(max)= 26.420

|                                |                                  |
|--------------------------------|----------------------------------|
| R(reflections)= 0.0339 ( 1967) | wR2(reflections)= 0.0827 ( 2194) |
| S = 1.103                      | Npar= 253                        |

---

The following ALERTS were generated. Each ALERT has the format

**test-name\_ALERT\_alert-type\_alert-level.**

Click on the hyperlinks for more details of the test.

---

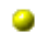

### Alert level C

|                   |                                                 |              |
|-------------------|-------------------------------------------------|--------------|
| PLAT042_ALERT_1_C | Calc. and Reported MoietyFormula Strings Differ | Please Check |
| PLAT088_ALERT_3_C | Poor Data / Parameter Ratio .....               | 8.67 Note    |
| PLAT245_ALERT_2_C | U(iso) H8E Smaller than U(eq) C8 by             | 0.023 Ang**2 |
| PLAT353_ALERT_3_C | Long N-H (N0.87,N1.01A) N1 - H1A .              | 1.04 Ang.    |
| PLAT353_ALERT_3_C | Long N-H (N0.87,N1.01A) N1 - H1B .              | 1.05 Ang.    |
| PLAT353_ALERT_3_C | Long N-H (N0.87,N1.01A) N2 - H2A .              | 1.03 Ang.    |
| PLAT353_ALERT_3_C | Long N-H (N0.87,N1.01A) N2 - H2B .              | 1.04 Ang.    |
| PLAT414_ALERT_2_C | Short Intra D-H..H-X H1A ..H7 .                 | 1.92 Ang.    |
|                   | x,y,z =                                         | 1_555 Check  |
| PLAT414_ALERT_2_C | Short Intra D-H..H-X H2A ..H3 .                 | 1.90 Ang.    |
|                   | x,y,z =                                         | 1_555 Check  |
| PLAT906_ALERT_3_C | Large K Value in the Analysis of Variance ..... | 2.778 Check  |

---

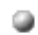

### Alert level G

|                   |                                                  |              |
|-------------------|--------------------------------------------------|--------------|
| PLAT002_ALERT_2_G | Number of Distance or Angle Restraints on AtSite | 21 Note      |
| PLAT003_ALERT_2_G | Number of Uiso or Uij Restrained non-H Atoms ... | 6 Report     |
| PLAT005_ALERT_5_G | No Embedded Refinement Details Found in the CIF  | Please Do !  |
| PLAT068_ALERT_1_G | Reported F000 Differs from Calcd (or Missing)... | Please Check |
| PLAT164_ALERT_4_G | Nr. of Refined C-H H-Atoms in Heavy-Atom Struct. | 4 Note       |
| PLAT300_ALERT_4_G | Atom Site Occupancy of H8A Constrained at        | 0.5 Check    |
| PLAT300_ALERT_4_G | Atom Site Occupancy of H8B Constrained at        | 0.5 Check    |
| PLAT300_ALERT_4_G | Atom Site Occupancy of H8C Constrained at        | 0.5 Check    |
| PLAT300_ALERT_4_G | Atom Site Occupancy of H8D Constrained at        | 0.5 Check    |
| PLAT300_ALERT_4_G | Atom Site Occupancy of H8E Constrained at        | 0.5 Check    |
| PLAT300_ALERT_4_G | Atom Site Occupancy of H8F Constrained at        | 0.5 Check    |
| PLAT779_ALERT_4_G | Suspect or Irrelevant (Bond) Angle(s) in CIF ... | 38.00 Deg.   |
|                   | H8D -C8 -H8C 1_555 1_555 1_555 ..... #           | 40 Check     |
| PLAT779_ALERT_4_G | Suspect or Irrelevant (Bond) Angle(s) in CIF ... | 41.00 Deg.   |
|                   | H8F -C8 -H8B 1_555 1_555 1_555 ..... #           | 48 Check     |
| PLAT790_ALERT_4_G | Centre of Gravity not Within Unit Cell: Resd. #  | 2 Note       |
|                   | Cl O2 Se                                         |              |
| PLAT802_ALERT_4_G | CIF Input Record(s) with more than 80 Characters | 1 Info       |
| PLAT860_ALERT_3_G | Number of Least-Squares Restraints .....         | 143 Note     |
| PLAT910_ALERT_3_G | Missing # of FCF Reflection(s) Below Theta(Min). | 1 Note       |
| PLAT912_ALERT_4_G | Missing # of FCF Reflections Above STh/L= 0.600  | 4 Note       |
| PLAT978_ALERT_2_G | Number C-C Bonds with Positive Residual Density. | 8 Info       |
| PLAT979_ALERT_1_G | NoSpherA2 Scattering Factors Used .....          | Please Note  |

---

- 0 **ALERT level A** = Most likely a serious problem - resolve or explain  
0 **ALERT level B** = A potentially serious problem, consider carefully  
10 **ALERT level C** = Check. Ensure it is not caused by an omission or oversight  
20 **ALERT level G** = General information/check it is not something unexpected
- 3 ALERT type 1 CIF construction/syntax error, inconsistent or missing data  
6 ALERT type 2 Indicator that the structure model may be wrong or deficient  
8 ALERT type 3 Indicator that the structure quality may be low  
12 ALERT type 4 Improvement, methodology, query or suggestion  
1 ALERT type 5 Informative message, check

---

---

It is advisable to attempt to resolve as many as possible of the alerts in all categories. Often the minor alerts point to easily fixed oversights, errors and omissions in your CIF or refinement strategy, so attention to these fine details can be worthwhile. In order to resolve some of the more serious problems it may be necessary to carry out additional measurements or structure refinements. However, the purpose of your study may justify the reported deviations and the more serious of these should normally be commented upon in the discussion or experimental section of a paper or in the "special\_details" fields of the CIF. checkCIF was carefully designed to identify outliers and unusual parameters, but every test has its limitations and alerts that are not important in a particular case may appear. Conversely, the absence of alerts does not guarantee there are no aspects of the results needing attention. It is up to the individual to critically assess their own results and, if necessary, seek expert advice.

### **Publication of your CIF in IUCr journals**

A basic structural check has been run on your CIF. These basic checks will be run on all CIFs submitted for publication in IUCr journals (*Acta Crystallographica*, *Journal of Applied Crystallography*, *Journal of Synchrotron Radiation*); however, if you intend to submit to *Acta Crystallographica Section C* or *E* or *IUCrData*, you should make sure that full publication checks are run on the final version of your CIF prior to submission.

### **Publication of your CIF in other journals**

Please refer to the *Notes for Authors* of the relevant journal for any special instructions relating to CIF submission.
