# Supplementary material for: Hydrogen Bonds Stabilize Chloroselenite Anions: Crystal Structure of a New Salt and Donor-Acceptor Bonding to SeO2
Source: Molecules. 2023 Nov 8;28(22):7489. doi: 10.3390/molecules28227489 (PMC10673179; doi:10.3390/molecules28227489)
Supplement: Supplementary file 1 [file molecules-28-07489-s001.zip › 2_TolAmSeO2C_let0507b.cif]

data_2_Tolylamidinium_ClSeO2
# Data code: let0507b
_audit_creation_date               2023-10-11
_audit_creation_method
;
Olex2 1.5-alpha
(compiled 2023.08.24 svn.re1ec1418 for OlexSys, GUI svn.r6817)
;
_audit_contact_author_address      ?
_audit_contact_author_email        ?
_audit_contact_author_name         ''
_audit_contact_author_phone        ?
_publ_contact_author_id_orcid      ?
_publ_section_references
;
Bourhis, L.J., Dolomanov, O.V., Gildea, R.J., Howard, J.A.K., Puschmann, H.
 (2015). Acta Cryst. A71, 59-75.

Dolomanov, O.V., Bourhis, L.J., Gildea, R.J, Howard, J.A.K. & Puschmann, H.
 (2009), J. Appl. Cryst. 42, 339-341.

Kleemiss, F., Dolomanov, O.V., Bodensteiner, M., Peyerimhoff, N., Midgley, M.,
Bourhis, L.J., Genoni, A., Malaspina, L.A., Jayatilaka, D., Spencer, J.L.,
White, F., Grundkoetter-Stock, B, Steinhauer, S., Lentz, D., Puschmann, H.,
Grabowsky, S. (2021), Chem. Sci., 12, 1675-1692.

Sheldrick, G.M. (2008). Acta Cryst. A64, 112-122.
;
_chemical_name_systematic
;
 ? 
;
_chemical_formula_moiety           'Cl O2 Se, C8 H11 N2'
_chemical_formula_sum              'C8 H11 Cl N2 O2 Se'
_chemical_formula_weight           281.601
loop_
  _atom_type_symbol
  _atom_type_scat_dispersion_real
  _atom_type_scat_dispersion_imag
  _atom_type_scat_source
  _atom_type_scat_dispersion_source
 C 0.00313 0.00162 'NoSpherA2: Chem.Sci. 2021, DOI:10.1039/D0SC05526C'
 'Brennan, Cowan, Rev. Sci. Instrum., 1992, 63, 850'
 Cl 0.14908 0.15974 'NoSpherA2: Chem.Sci. 2021, DOI:10.1039/D0SC05526C'
 'Brennan, Cowan, Rev. Sci. Instrum., 1992, 63, 850'
 H 0.00000 0.00000 'NoSpherA2: Chem.Sci. 2021, DOI:10.1039/D0SC05526C'
 'Brennan, Cowan, Rev. Sci. Instrum., 1992, 63, 850'
 N 0.00612 0.00332 'NoSpherA2: Chem.Sci. 2021, DOI:10.1039/D0SC05526C'
 'Brennan, Cowan, Rev. Sci. Instrum., 1992, 63, 850'
 O 0.01085 0.00610 'NoSpherA2: Chem.Sci. 2021, DOI:10.1039/D0SC05526C'
 'Brennan, Cowan, Rev. Sci. Instrum., 1992, 63, 850'
 Se -0.09313 2.23705 'NoSpherA2: Chem.Sci. 2021, DOI:10.1039/D0SC05526C'
 'Brennan, Cowan, Rev. Sci. Instrum., 1992, 63, 850'

_space_group_crystal_system        'monoclinic'
_space_group_IT_number             14
_space_group_name_H-M_alt          'P 1 21/c 1'
_space_group_name_Hall             '-P 2ybc'
loop_
  _space_group_symop_id
  _space_group_symop_operation_xyz
 1 x,y,z
 2 -x,y+1/2,-z+1/2
 3 -x,-y,-z
 4 x,-y-1/2,z-1/2

_symmetry_Int_Tables_number        14
_cell_length_a                     3.9773(3)
_cell_length_b                     28.477(2)
_cell_length_c                     9.5781(9)
_cell_angle_alpha                  90
_cell_angle_beta                   91.242(1)
_cell_angle_gamma                  90
_cell_volume                       1084.56(16)
_cell_formula_units_Z              4
_cell_measurement_reflns_used      5555
_cell_measurement_temperature      193(2)
_cell_measurement_theta_max        26.38
_cell_measurement_theta_min        2.24
_exptl_absorpt_coefficient_mu      3.685
_exptl_absorpt_correction_T_max    0.6661
_exptl_absorpt_correction_T_min    0.3505
_exptl_absorpt_correction_type     multi-scan
_exptl_absorpt_process_details     'SADABS (Sheldrick, 1996)'
_exptl_crystal_colour              'clear colourless'
_exptl_crystal_colour_lustre       clear
_exptl_crystal_colour_modifier     .
_exptl_crystal_colour_primary      colourless
_exptl_crystal_density_diffrn      1.725
_exptl_crystal_density_meas        .
_exptl_crystal_density_method      'not measured'
_exptl_crystal_description         prism
_exptl_crystal_F_000               560.842
loop_
  _exptl_crystal_face_index_h
  _exptl_crystal_face_index_k
  _exptl_crystal_face_index_l
  _exptl_crystal_face_perp_dist
 0.00 -1.00 0.00 0.0580
 0.00 1.00 0.00 0.0580
 0.00 0.00 -1.00 0.1520
 0.00 0.00 1.00 0.1520
 -1.00 0.00 1.00 0.1410
 2.00 -2.00 -1.00 0.1660

_exptl_crystal_size_max            0.36
_exptl_crystal_size_mid            0.3
_exptl_crystal_size_min            0.12
_exptl_special_details
;
 ? 
;
_diffrn_reflns_av_R_equivalents    0.0328
_diffrn_reflns_av_unetI/netI       0.0282
_diffrn_reflns_Laue_measured_fraction_full  0.9995
_diffrn_reflns_Laue_measured_fraction_max  0.9977
_diffrn_reflns_limit_h_max         4
_diffrn_reflns_limit_h_min         -4
_diffrn_reflns_limit_k_max         35
_diffrn_reflns_limit_k_min         -35
_diffrn_reflns_limit_l_max         11
_diffrn_reflns_limit_l_min         -11
_diffrn_reflns_number              8245
_diffrn_reflns_point_group_measured_fraction_full  0.9995
_diffrn_reflns_point_group_measured_fraction_max  0.9977
_diffrn_reflns_theta_full          25.2417
_diffrn_reflns_theta_max           26.42
_diffrn_reflns_theta_min           2.24
_diffrn_ambient_temperature        193.15
_diffrn_measured_fraction_theta_full  0.9995
_diffrn_measured_fraction_theta_max  0.9977
_diffrn_measurement_device_type    'CCD area detector'
_diffrn_measurement_method         'phi and omega scans'
_diffrn_radiation_monochromator    graphite
_diffrn_radiation_type             'Mo K\a'
_diffrn_radiation_wavelength       0.71073
_diffrn_source_current             40.0
_diffrn_source_power               1.8
_diffrn_source_voltage             45.0
_reflns_Friedel_coverage           0.0
_reflns_limit_h_max                4
_reflns_limit_h_min                -4
_reflns_limit_k_max                35
_reflns_limit_k_min                0
_reflns_limit_l_max                11
_reflns_limit_l_min                0
_reflns_number_gt                  1967
_reflns_number_total               2194
_reflns_threshold_expression       I>=2u(I)
_computing_molecular_graphics      'Olex2 1.5-alpha (Dolomanov et al., 2009)'
_computing_publication_material    'Olex2 1.5-alpha (Dolomanov et al., 2009)'
_computing_structure_refinement   
 'olex2.refine 1.5-alpha (Bourhis et al., 2015)'
_computing_structure_solution      'SHELXS  (Sheldrick, 2008)'
_refine_diff_density_max           1.0604
_refine_diff_density_min           -0.7677
_refine_diff_density_rms           0.1194
_refine_ls_d_res_high              0.7987
_refine_ls_d_res_low               9.0764
_refine_ls_goodness_of_fit_ref     1.1032
_refine_ls_hydrogen_treatment      refall
_refine_ls_matrix_type             full
_refine_ls_number_constraints      0
_refine_ls_number_parameters       253
_refine_ls_number_reflns           2194
_refine_ls_number_restraints       143
_refine_ls_R_factor_all            0.0393
_refine_ls_R_factor_gt             0.0339
_refine_ls_restrained_S_all        1.0647
_refine_ls_shift/su_max            0.0010
_refine_ls_shift/su_mean           0.0000
_refine_ls_structure_factor_coef   Fsqd
_refine_ls_weighting_details      
 'w=1/[\s^2^(Fo^2^)+(0.0423P)^2^+1.2540P] where P=(Fo^2^+2Fc^2^)/3'
_refine_ls_weighting_scheme        calc
_refine_ls_wR_factor_gt            0.0805
_refine_ls_wR_factor_ref           0.0827
_olex2_refinement_description
;
1. Restrained distances
 C7-H7 = C3-H3 = C4-H4 = C6-H6
 1.085 with sigma of 0.02
 N1-H1b = N2-H2b = N2-H2a = N1-H1a
 1.04 with sigma of 0.02
 C8-H8d \\sim C8-H8e \\sim C8-H8f
 with sigma of 0.01
 H8a-H8b \\sim H8a-H8c \\sim H8b-H8c
 with sigma of 0.04
 H8d-H8e \\sim H8d-H8f \\sim H8e-H8f
 with sigma of 0.04
2. Uiso/Uaniso restraints and constraints
H8b \\sim H8f \\sim H8c \\sim H8d \\sim H8a \\sim H8e: within 2A with sigma of
0.04 and sigma for terminal atoms of 0.08 within 2A
Uanis(H8e) \\sim Ueq, Uanis(H8b) \\sim Ueq, Uanis(H8f) \\sim Ueq, Uanis(H8c)
\\sim Ueq, Uanis(H8a) \\sim Ueq, Uanis(H8d) \\sim Ueq: with sigma of 0.01 and
sigma for terminal atoms of 0.02
Uanis(H1b) \\sim Ueq, Uanis(H1a) \\sim Ueq, Uanis(H2b) \\sim Ueq, Uanis(H2a)
\\sim Ueq: with sigma of 0.01 and sigma for terminal atoms of 0.02
Uanis(H7) \\sim Ueq, Uanis(H3) \\sim Ueq, Uanis(H4) \\sim Ueq, Uanis(H6) \\sim
Ueq: with sigma of 0.01 and sigma for terminal atoms of 0.02
3. Rigid body (RIGU) restrains
 C7, H7
 with sigma for 1-2 distances of 0.004 and sigma for 1-3 distances of 0.004
 C6, H6
 with sigma for 1-2 distances of 0.004 and sigma for 1-3 distances of 0.004
 C3, H3
 with sigma for 1-2 distances of 0.004 and sigma for 1-3 distances of 0.004
 C4, H4
 with sigma for 1-2 distances of 0.004 and sigma for 1-3 distances of 0.004
 N2, H2a
 with sigma for 1-2 distances of 0.004 and sigma for 1-3 distances of 0.004
 N2, H2b
 with sigma for 1-2 distances of 0.004 and sigma for 1-3 distances of 0.004
 N1, H1a
 with sigma for 1-2 distances of 0.004 and sigma for 1-3 distances of 0.004
 N1, H1b
 with sigma for 1-2 distances of 0.004 and sigma for 1-3 distances of 0.004
4. Others
 Fixed Sof: H8a(0.5) H8b(0.5) H8c(0.5) H8d(0.5) H8e(0.5) H8f(0.5)
;
_olex2_refine_details
;
Refinement using NoSpherA2, an implementation of
NOn-SPHERical Atom-form-factors in Olex2.
Please cite:
F. Kleemiss et al. Chem. Sci. DOI 10.1039/D0SC05526C - 2021
NoSpherA2 implementation of HAR makes use of
tailor-made aspherical atomic form factors calculated
on-the-fly from a Hirshfeld-partitioned electron density (ED) - not from
spherical-atom form factors.

The ED is calculated from a gaussian basis set single determinant SCF
wavefunction - either Hartree-Fock or DFT using selected funtionals
 - for a fragment of the crystal.
This fragment can be embedded in an electrostatic crystal field by employing cluster charges
or modelled using implicit solvation models, depending on the software used.
The following options were used:
   SOFTWARE:       ORCA 5.0
   PARTITIONING:   NoSpherA2
   INT ACCURACY:   Normal
   METHOD:         R2SCAN
   BASIS SET:      def2-TZVP
   CHARGE:         0
   MULTIPLICITY:   1
   DATE:           2023-10-04_04-28-11
;
_atom_sites_solution_primary       direct
loop_
  _atom_site_label
  _atom_site_type_symbol
  _atom_site_fract_x
  _atom_site_fract_y
  _atom_site_fract_z
  _atom_site_U_iso_or_equiv
  _atom_site_adp_type
  _atom_site_occupancy
  _atom_site_refinement_flags_posn
  _atom_site_refinement_flags_adp
  _atom_site_refinement_flags_occupancy
  _atom_site_disorder_group
 Se1 Se -0.39680(8) 0.669100(10) 0.84402(3) 0.02403(12) Uani 1.000000 . . . .
 Cl1 Cl -0.0954(2) 0.60414(3) 0.77105(11) 0.0447(2) Uani 1.000000 . . . .
 O1 O -0.1159(6) 0.69502(8) 0.9462(2) 0.0324(5) Uani 1.000000 . . . .
 O2 O -0.4109(6) 0.70083(8) 0.7025(2) 0.0344(5) Uani 1.000000 . . . .
 N1 N 0.1940(8) 0.78641(10) 0.9533(3) 0.0330(6) Uani 1.000000 D U . .
 H1a H 0.315(9) 0.8026(13) 1.038(3) 0.036(9) Uani 1.000000 D U . .
 H1b H 0.075(9) 0.7537(9) 0.965(4) 0.029(9) Uani 1.000000 D U . .
 N2 N -0.0263(7) 0.78890(9) 0.7321(3) 0.0278(6) Uani 1.000000 D U . .
 H2a H -0.078(11) 0.8047(16) 0.637(3) 0.051(11) Uani 1.000000 D U . .
 H2b H -0.123(10) 0.7551(8) 0.738(4) 0.035(9) Uani 1.000000 D U . .
 C1 C 0.1488(7) 0.80911(11) 0.8339(3) 0.0224(6) Uani 1.000000 . . . .
 C2 C 0.2921(7) 0.85623(10) 0.8138(3) 0.0224(6) Uani 1.000000 . . . .
 C3 C 0.2929(9) 0.87678(12) 0.6806(3) 0.0302(7) Uani 1.000000 D U . .
 H3 H 0.181(10) 0.8585(13) 0.592(3) 0.050(10) Uani 1.000000 D U . .
 C4 C 0.4267(9) 0.92111(13) 0.6621(4) 0.0369(8) Uani 1.000000 D U . .
 H4 H 0.413(11) 0.9354(14) 0.558(2) 0.054(10) Uani 1.000000 D U . .
 C5 C 0.5697(8) 0.94615(12) 0.7736(4) 0.0349(8) Uani 1.000000 . . . .
 C6 C 0.5692(10) 0.92565(13) 0.9055(4) 0.0398(8) Uani 1.000000 D U . .
 H6 H 0.680(10) 0.9463(13) 0.990(3) 0.053(10) Uani 1.000000 D U . .
 C7 C 0.4334(9) 0.88147(12) 0.9253(3) 0.0337(7) Uani 1.000000 D U . .
 H7 H 0.436(10) 0.8677(13) 1.032(2) 0.047(9) Uani 1.000000 D U . .
 C8 C 0.7120(11) 0.99421(14) 0.7519(5) 0.0496(10) Uani 1.000000 D . . .
 H8a H 0.84(2) 1.007(4) 0.863(7) 0.07(3) Uani 0.500000 D U P 1
 H8b H 0.927(18) 0.996(3) 0.659(7) 0.05(2) Uani 0.500000 D U P 1
 H8c H 0.487(15) 1.021(3) 0.718(8) 0.04(2) Uani 0.500000 D U P 1
 H8d H 0.584(17) 1.020(2) 0.786(8) 0.05(2) Uani 0.500000 D U P 2
 H8e H 0.945(6) 0.995(2) 0.782(7) 0.025(16) Uani 0.500000 D U P 2
 H8f H 0.72(2) 0.997(3) 0.6515(17) 0.06(3) Uani 0.500000 D U P 2

loop_
  _atom_site_aniso_label
  _atom_site_aniso_U_11
  _atom_site_aniso_U_22
  _atom_site_aniso_U_33
  _atom_site_aniso_U_12
  _atom_site_aniso_U_13
  _atom_site_aniso_U_23
 Se1 0.02549(18) 0.02728(18) 0.01919(17) -0.00038(12) -0.00245(11) -0.00001(12)
 Cl1 0.0399(5) 0.0315(4) 0.0623(6) 0.0043(4) -0.0100(4) -0.0146(4)
 O1 0.0472(15) 0.0309(12) 0.0186(10) -0.0035(10) -0.0101(9) -0.0027(9)
 O2 0.0482(15) 0.0343(12) 0.0203(11) -0.0030(10) -0.0122(10) 0.0041(9)
 N1 0.0499(18) 0.0309(15) 0.0181(13) -0.0060(13) -0.0063(12) 0.0036(11)
 H1a 0.042(15) 0.048(16) 0.017(9) -0.014(7) 0.002(5) -0.001(5)
 H1b 0.038(15) 0.028(7) 0.020(16) 0.000(4) -0.002(8) 0.002(5)
 N2 0.0374(16) 0.0253(14) 0.0205(13) -0.0008(12) -0.0060(11) -0.0008(10)
 H2a 0.055(19) 0.063(18) 0.033(7) -0.002(8) -0.010(5) 0.018(5)
 H2b 0.044(17) 0.027(6) 0.035(17) -0.003(4) -0.000(8) -0.002(4)
 C1 0.0286(16) 0.0242(15) 0.0143(13) 0.0013(12) -0.0009(11) 0.0001(11)
 C2 0.0264(15) 0.0254(15) 0.0154(14) 0.0008(12) 0.0021(11) 0.0003(11)
 C3 0.0394(18) 0.0307(17) 0.0205(15) -0.0019(14) 0.0010(12) 0.0022(12)
 H3 0.059(16) 0.059(16) 0.033(10) -0.012(7) -0.003(5) -0.010(5)
 C4 0.047(2) 0.0299(17) 0.0334(18) -0.0032(15) 0.0028(15) 0.0068(14)
 H4 0.069(18) 0.055(17) 0.040(6) -0.001(8) 0.003(4) 0.017(4)
 C5 0.0315(18) 0.0283(17) 0.045(2) 0.0005(14) 0.0044(14) 0.0022(15)
 C6 0.049(2) 0.0312(18) 0.039(2) -0.0055(15) -0.0094(16) -0.0046(15)
 H6 0.056(17) 0.058(15) 0.046(11) -0.016(7) -0.005(6) -0.016(6)
 C7 0.047(2) 0.0293(17) 0.0248(16) -0.0044(15) -0.0075(14) -0.0025(13)
 H7 0.068(18) 0.045(16) 0.029(6) -0.010(8) -0.009(4) 0.003(4)
 C8 0.043(2) 0.031(2) 0.075(3) -0.0043(18) 0.001(2) 0.003(2)
 H8a 0.07(3) 0.07(3) 0.07(3) -0.002(9) -0.001(9) -0.001(9)
 H8b 0.05(3) 0.04(3) 0.05(3) 0.001(9) 0.000(9) -0.002(9)
 H8c 0.05(2) 0.03(2) 0.05(3) 0.001(9) -0.003(9) -0.005(9)
 H8d 0.06(3) 0.05(3) 0.06(3) 0.002(9) 0.000(9) -0.001(9)
 H8e 0.02(2) 0.04(2) 0.02(2) -0.002(9) 0.003(9) 0.003(9)
 H8f 0.06(3) 0.06(3) 0.06(3) -0.002(9) 0.001(9) 0.005(9)

loop_
  _geom_bond_atom_site_label_1
  _geom_bond_atom_site_label_2
  _geom_bond_distance
  _geom_bond_site_symmetry_2
  _geom_bond_publ_flag
 Se1 Cl1 2.3202(9) . ?
 Se1 O1 1.645(2) . ?
 Se1 O2 1.629(2) . ?
 N1 H1a 1.045(17) . ?
 N1 H1b 1.051(18) . ?
 N1 C1 1.323(4) . ?
 N2 H2a 1.030(17) . ?
 N2 H2b 1.039(18) . ?
 N2 C1 1.318(4) . ?
 C1 C2 1.472(4) . ?
 C2 C3 1.404(4) . ?
 C2 C7 1.395(4) . ?
 C3 H3 1.083(17) . ?
 C3 C4 1.383(5) . ?
 C4 H4 1.080(17) . ?
 C4 C5 1.395(5) . ?
 C5 C6 1.392(5) . ?
 C5 C8 1.497(5) . ?
 C6 H6 1.082(17) . ?
 C6 C7 1.384(5) . ?
 C7 H7 1.091(17) . ?
 C8 H8a 1.23(7) . ?
 C8 H8b 1.25(6) . ?
 C8 H8c 1.22(6) . ?
 C8 H8d 0.962(14) . ?
 C8 H8e 0.965(14) . ?
 C8 H8f 0.967(14) . ?

loop_
  _geom_angle_atom_site_label_1
  _geom_angle_atom_site_label_2
  _geom_angle_atom_site_label_3
  _geom_angle
  _geom_angle_site_symmetry_1
  _geom_angle_site_symmetry_3
  _geom_angle_publ_flag
 O1 Se1 Cl1 100.86(9) . . ?
 O2 Se1 Cl1 101.56(9) . . ?
 O2 Se1 O1 104.90(11) . . ?
 H1b N1 H1a 121(3) . . ?
 C1 N1 H1a 121(2) . . ?
 C1 N1 H1b 118(2) . . ?
 H2b N2 H2a 113(3) . . ?
 C1 N2 H2a 124(3) . . ?
 C1 N2 H2b 124(2) . . ?
 N2 C1 N1 119.1(3) . . ?
 C2 C1 N1 120.8(3) . . ?
 C2 C1 N2 120.1(3) . . ?
 C3 C2 C1 120.5(3) . . ?
 C7 C2 C1 121.4(3) . . ?
 C7 C2 C3 118.2(3) . . ?
 H3 C3 C2 120(2) . . ?
 C4 C3 C2 120.4(3) . . ?
 C4 C3 H3 119(2) . . ?
 H4 C4 C3 117(2) . . ?
 C5 C4 C3 121.4(3) . . ?
 C5 C4 H4 122(2) . . ?
 C6 C5 C4 118.2(3) . . ?
 C8 C5 C4 120.7(3) . . ?
 C8 C5 C6 121.1(4) . . ?
 H6 C6 C5 116(2) . . ?
 C7 C6 C5 120.9(3) . . ?
 C7 C6 H6 123(2) . . ?
 C6 C7 C2 121.0(3) . . ?
 H7 C7 C2 122(2) . . ?
 H7 C7 C6 117(2) . . ?
 H8a C8 C5 108(5) . . ?
 H8b C8 C5 114(4) . . ?
 H8b C8 H8a 108(5) . . ?
 H8c C8 C5 109(4) . . ?
 H8c C8 H8a 110(5) . . ?
 H8c C8 H8b 107(4) . . ?
 H8d C8 C5 117(5) . . ?
 H8d C8 H8a 72(5) . . ?
 H8d C8 H8b 125(7) . . ?
 H8d C8 H8c 38(5) . . ?
 H8e C8 C5 111(4) . . ?
 H8e C8 H8a 49(4) . . ?
 H8e C8 H8b 63(4) . . ?
 H8e C8 H8c 139(5) . . ?
 H8e C8 H8d 112(5) . . ?
 H8f C8 C5 104(5) . . ?
 H8f C8 H8a 144(7) . . ?
 H8f C8 H8b 41(5) . . ?
 H8f C8 H8c 74(5) . . ?
 H8f C8 H8d 107(5) . . ?
 H8f C8 H8e 104(4) . . ?

loop_
  _geom_hbond_atom_site_label_D
  _geom_hbond_atom_site_label_H
  _geom_hbond_atom_site_label_A
  _geom_hbond_distance_DH
  _geom_hbond_distance_HA
  _geom_hbond_distance_DA
  _geom_hbond_angle_DHA
  _geom_hbond_site_symmetry_A
 N1 H1a O2 1.045(17) 1.90(3) 2.852(3) 151(3) 4_676
 N1 H1b O1 1.051(18) 1.84(2) 2.880(4) 168(3) .
 N2 H2a O1 1.030(17) 1.83(3) 2.792(3) 153(4) 4_575
 N2 H2b O2 1.039(18) 1.95(2) 2.948(4) 160(3) .

loop_
  _geom_torsion_atom_site_label_1
  _geom_torsion_atom_site_label_2
  _geom_torsion_atom_site_label_3
  _geom_torsion_atom_site_label_4
  _geom_torsion
  _geom_torsion_site_symmetry_1
  _geom_torsion_site_symmetry_2
  _geom_torsion_site_symmetry_3
  _geom_torsion_site_symmetry_4
  _geom_torsion_publ_flag
 N1 C1 C2 C3 169.2(3) . . . . ?
 N1 C1 C2 C7 -10.1(4) . . . . ?
 N2 C1 C2 C3 -10.7(4) . . . . ?
 N2 C1 C2 C7 170.0(3) . . . . ?
 C1 C2 C3 C4 179.8(3) . . . . ?
 C1 C2 C7 C6 179.6(3) . . . . ?
 C2 C3 C4 C5 1.3(4) . . . . ?
 C2 C7 C6 C5 -0.2(4) . . . . ?
 C3 C4 C5 C6 -1.2(4) . . . . ?
 C3 C4 C5 C8 -179.7(4) . . . . ?
 C4 C5 C6 C7 0.6(4) . . . . ?

loop_
  _diffrn_refln_index_h
  _diffrn_refln_index_k
  _diffrn_refln_index_l
  _diffrn_refln_intensity_net
  _diffrn_refln_intensity_u
 2 12 10 84.91 6.98
 1 11 11 33.1 5.01
 2 11 10 151.84 9.44
 1 10 11 101.3 7.31
 2 10 10 3 3.71
 1 9 11 129.23 8.53
 2 9 10 3.27 3.72
 1 8 11 157.66 9.34
 2 8 10 12.98 4.1
 1 7 11 29.33 4.67
 2 7 10 107.38 7.27
 3 7 9 47.84 5.36
 1 6 11 -0.2 3.43
 2 6 10 49.32 5.22
 3 6 9 20.82 4.54
 1 5 11 20.79 3.99
 2 5 10 96.4 6.8
 3 5 9 0.96 3.62
 1 4 11 50.52 5.15
 2 4 10 68.71 5.7
 3 4 9 68.96 6.22
 2 3 10 1.03 3.26
 3 3 9 122.79 8.08
 2 2 10 9.82 3.37
 3 2 9 29.83 4.55
 2 1 10 49.22 4.86
 3 1 9 57.41 5.49
 2 0 10 110.95 7.19
 3 0 9 4.1 3.69
 2 -1 10 42.97 4.58
 3 -1 9 53.01 5.43
 1 -2 11 17.54 4.86
 2 -2 10 13.23 3.28
 3 -2 9 28.38 4.38
 1 -3 11 102.04 8.49
 2 -3 10 3.3 2.93
 3 -3 9 120.81 7.82
 1 -4 11 55.71 6.62
 2 -4 10 68.18 5.42
 3 -4 9 66.59 5.74
 1 -5 11 23.73 5.16
 2 -5 10 107.4 6.64
 3 -5 9 6.76 3.51
 1 -6 11 5.4 4.6
 2 -6 10 52.29 6.54
 3 -6 9 19.94 3.95
 1 -7 11 25.31 5.86
 2 -7 10 95.4 8.36
 3 -7 9 37.31 4.71
 1 -8 11 154.12 11.06
 2 -8 10 17.02 5.08
 1 -9 11 149.51 10.6
 2 -9 10 4.94 4.5
 1 -10 11 105.03 9.04
 2 -10 10 -0.6 4.52
 1 -11 11 37.19 6.3
 2 -11 10 162.8 11.04
 2 -12 10 85.45 8.16
 2 18 9 2.63 4.11
 1 17 10 2.89 4.1
 2 17 9 15.11 4.44
 1 16 10 23.96 4.74
 2 16 9 284.94 14.77
 1 15 10 4.7 3.75
 2 15 9 63.33 6.04
 1 14 10 60.88 5.77
 2 14 9 144.58 9.62
 3 14 8 33.59 4.96
 0 13 11 -0.45 4.08
 1 13 10 4.47 3.67
 2 13 9 15.79 4.11
 3 13 8 49.95 5.51
 0 12 11 3.23 3.76
 1 12 10 249.1 13.24
 2 12 9 15.2 4.1
 3 12 8 117.19 8.02
 0 11 11 25.24 4.47
 1 11 10 25.17 4.46
 2 11 9 16.61 4.15
 3 11 8 20.87 4.25
 1 10 10 93.73 6.94
 2 10 9 142.17 8.59
 3 10 8 55.75 5.52
 1 9 10 -0.52 3.51
 2 9 9 27.44 4.23
 3 9 8 3.46 3.49
 1 8 10 38.45 4.66
 2 8 9 96.66 6.83
 3 8 8 39.74 4.76
 1 7 10 60.84 5.39
 2 7 9 9.26 3.47
 3 7 8 10 3.61
 1 6 10 194.22 10.23
 2 6 9 15.63 3.63
 3 6 8 245.6 12.57
 1 5 10 21.81 3.95
 2 5 9 -2.51 2.88
 3 5 8 12.84 3.92
 1 4 10 39.7 4.35
 2 4 9 42.73 4.43
 3 4 8 36.48 4.84
 0 3 11 46.82 6.1
 1 3 10 -0.07 2.92
 2 3 9 7.78 3.15
 3 3 8 21.85 4
 0 2 11 98.3 7.83
 1 2 10 19.02 3.54
 2 2 9 172.93 9.47
 3 2 8 71.89 5.92
 0 1 11 17.48 4.82
 1 1 10 11.07 3.3
 2 1 9 2.83 2.95
 3 1 8 15.35 3.68
 0 0 11 0.71 4.22
 1 0 10 57.71 3.7
 2 0 9 4.06 3.03
 3 0 8 122 7.78
 0 -1 11 21.18 4.9
 1 -1 10 12.88 4.28
 2 -1 9 0.36 2.87
 3 -1 8 7.49 3.44
 0 -2 11 86.75 7.69
 1 -2 10 20.32 4.72
 2 -2 9 176 9.36
 3 -2 8 64.82 5.61
 0 -3 11 67.21 6.61
 1 -3 10 5.09 3.81
 2 -3 9 8.71 2.45
 3 -3 8 21.77 3.78
 0 -4 11 119.63 9.13
 1 -4 10 38.51 5.46
 2 -4 9 39.47 3.26
 3 -4 8 40.96 4.48
 0 -5 11 11.46 4.49
 1 -5 10 18.71 4.6
 2 -5 9 3.1 2.22
 3 -5 8 9.19 3.46
 0 -6 11 0.05 4.07
 1 -6 10 190.71 11.87
 2 -6 9 11.59 2.5
 3 -6 8 227.71 12.04
 0 -7 11 1.2 4.28
 1 -7 10 78.51 6.97
 2 -7 9 10.65 2.48
 3 -7 8 8.77 2.66
 0 -8 11 162.99 11.13
 1 -8 10 42.4 5.87
 2 -8 9 101.83 4.96
 3 -8 8 39.57 3.48
 0 -9 11 10.08 4.7
 1 -9 10 4.52 4.36
 2 -9 9 20.97 2.83
 3 -9 8 0.2 2.43
 0 -10 11 150.35 10.66
 1 -10 10 107.05 8.52
 2 -10 9 136.39 6.02
 3 -10 8 44.76 3.67
 0 -11 11 29.42 5.69
 1 -11 10 23.21 5.17
 2 -11 9 12.1 4.86
 3 -11 8 20.74 3.04
 0 -12 11 9.2 5.08
 1 -12 10 264.16 15.22
 2 -12 9 9.66 4.5
 3 -12 8 112.67 5.76
 0 -13 11 -0.89 4.66
 1 -13 10 8.8 4.77
 2 -13 9 8.47 4.71
 3 -13 8 46.51 3.85
 0 -14 11 102.62 8.86
 1 -14 10 56.58 6.73
 2 -14 9 175 11.31
 3 -14 8 24.92 3.38
 1 -15 10 -0.42 4.5
 2 -15 9 44.96 6.34
 1 -16 10 26.11 5.56
 2 -16 9 267.72 16.1
 1 -17 10 5.64 4.76
 2 -17 9 16.49 5.32
 2 -18 9 4.6 4.74
 1 22 9 157.26 10.47
 1 21 9 16.54 5.1
 2 21 8 0.33 3.89
 1 20 9 56.98 6.42
 2 20 8 38.29 5.36
 0 19 10 7.48 4.32
 1 19 9 19.57 4.72
 2 19 8 4.89 4.04
 0 18 10 155.05 9.75
 1 18 9 19.45 4.82
 2 18 8 174.08 10.81
 3 18 7 4.7 3.96
 0 17 10 0.01 3.76
 1 17 9 3.46 4.1
 2 17 8 29.87 4.85
 3 17 7 0.02 3.7
 0 16 10 12.4 4.13
 1 16 9 76.66 6.48
 2 16 8 57.47 5.69
 3 16 7 81.09 6.71
 0 15 10 1.65 3.73
 1 15 9 9.39 3.91
 2 15 8 2.22 3.54
 3 15 7 3.63 3.79
 0 14 10 86.56 6.61
 1 14 9 67.66 5.96
 2 14 8 127 8.28
 3 14 7 89.75 6.84
 0 13 10 11.24 3.91
 1 13 9 5.52 3.5
 2 13 8 15.13 3.89
 3 13 7 10.98 3.73
 0 12 10 142.05 8.64
 1 12 9 -0.73 3.17
 2 12 8 127.4 8.15
 3 12 7 -3.93 3.01
 0 11 10 16 3.82
 1 11 9 7.36 3.29
 2 11 8 3.66 3.11
 3 11 7 3.45 3.38
 0 10 10 9.38 3.72
 1 10 9 221.93 11.35
 2 10 8 4.72 3.2
 3 10 7 218.55 11.37
 4 10 6 -2.5 3.83
 0 9 10 -0.05 3.33
 1 9 9 6.06 3.25
 2 9 8 2.83 2.96
 3 9 7 44.36 4.98
 4 9 6 -1.03 3.52
 -1 8 11 46.99 6.14
 0 8 10 118.14 7.25
 1 8 9 199.73 10.35
 2 8 8 56.04 5.03
 3 8 7 164.11 9.37
 4 8 6 97.08 7.24
 -1 7 11 -2.95 4.23
 0 7 10 91.91 6.24
 1 7 9 2.96 3.18
 2 7 8 21.24 3.67
 3 7 7 34.64 4.29
 4 7 6 13.15 4.22
 -1 6 11 6.63 4.52
 0 6 10 237.48 8.81
 1 6 9 54.46 4.78
 2 6 8 231.75 11.25
 3 6 7 93.92 6.65
 4 6 6 158.62 9.64
 -1 5 11 17.08 4.67
 0 5 10 60.34 5.9
 1 5 9 4.6 3.09
 2 5 8 15.25 3.36
 3 5 7 50.93 4.94
 4 5 6 13.26 4.1
 -1 4 11 139.66 9.56
 0 4 10 23.36 4.36
 1 4 9 454.34 20.64
 2 4 8 168.5 9.02
 3 4 7 305.1 15.31
 4 4 6 17.97 4.04
 -1 3 11 71.33 6.88
 0 3 10 34.89 4.87
 1 3 9 96.86 6.18
 2 3 8 43.76 4.26
 3 3 7 3.26 3.17
 4 3 6 15.43 4.08
 -1 2 11 106.65 8.43
 0 2 10 131.71 8.77
 1 2 9 300.44 10.35
 2 2 8 171.26 9.27
 3 2 7 110.52 7.01
 4 2 6 73.3 6.37
 -1 1 11 28.18 5.14
 0 1 10 68.75 6.52
 1 1 9 115.05 5.06
 2 1 8 17.36 3.48
 3 1 7 -0.26 2.78
 4 1 6 39.88 4.95
 -1 0 11 2.33 4.13
 0 0 10 396.13 19.91
 1 0 9 6.17 2.27
 2 0 8 764.11 32.58
 3 0 7 -0.06 2.97
 4 0 6 239.67 12.69
 -1 -1 11 31.19 5.15
 0 -1 10 87.34 6.92
 1 -1 9 109.03 4.93
 2 -1 8 35.33 3.8
 3 -1 7 0.65 2.9
 4 -1 6 45.65 5.22
 -1 -2 11 112.62 8.58
 0 -2 10 128.12 8.86
 1 -2 9 301.43 10.32
 2 -2 8 168.07 6.8
 3 -2 7 99.83 6.74
 4 -2 6 77.94 6.47
 -1 -3 11 77.08 6.95
 0 -3 10 37.75 5.16
 1 -3 9 91.35 4.52
 2 -3 8 37.92 3.06
 3 -3 7 11.09 3.2
 4 -3 6 11.94 3.77
 -1 -4 11 140.91 9.75
 0 -4 10 23.8 4.63
 1 -4 9 487.84 15.25
 2 -4 8 163.82 6.57
 3 -4 7 314.57 15.13
 4 -4 6 14.86 3.93
 -1 -5 11 21.67 4.82
 0 -5 10 52.62 6.04
 1 -5 9 18.11 4.3
 2 -5 8 15.84 2.5
 3 -5 7 42.84 3.35
 4 -5 6 26.38 4.41
 -1 -6 11 4.59 4.19
 0 -6 10 250.5 13.72
 1 -6 9 54.15 5.73
 2 -6 8 213.74 8.05
 3 -6 7 91.68 4.73
 4 -6 6 141.48 9.23
 -1 -7 11 5.87 4.27
 0 -7 10 93.44 7.47
 1 -7 9 1.6 3.4
 2 -7 8 24 2.67
 3 -7 7 31.87 3.14
 4 -7 6 13.74 3.85
 -1 -8 11 51.61 6.2
 0 -8 10 116.97 8.53
 1 -8 9 196.88 11.8
 2 -8 8 57.62 3.58
 3 -8 7 161.15 6.74
 4 -8 6 85.89 6.77
 -1 -9 11 26.96 5.55
 0 -9 10 8.59 4.03
 1 -9 9 6.29 3.99
 2 -9 8 5.52 2.13
 3 -9 7 41.43 3.4
 4 -9 6 -0.77 2.86
 -1 -10 11 88.98 7.94
 0 -10 10 7.2 4.22
 1 -10 9 222.24 12.88
 2 -10 8 -0.25 1.92
 3 -10 7 202.62 8.08
 4 -10 6 1.81 2.81
 -1 -11 11 26.38 5.67
 0 -11 10 12.5 4.69
 1 -11 9 10.56 4.3
 2 -11 8 0.42 2.04
 3 -11 7 3.97 2.38
 -1 -12 11 10.16 5.13
 0 -12 10 152.26 10.38
 1 -12 9 -2.72 3.79
 2 -12 8 128.26 5.67
 3 -12 7 1.16 2.51
 0 -13 10 7.04 4.86
 1 -13 9 2.76 4.14
 2 -13 8 13.11 2.52
 3 -13 7 12.3 2.75
 0 -14 10 87.03 7.85
 1 -14 9 71.85 6.94
 2 -14 8 126.24 9.3
 3 -14 7 72.67 4.56
 0 -15 10 -4.7 4.24
 1 -15 9 7.87 4.2
 2 -15 8 1.12 4.15
 3 -15 7 2.2 2.53
 0 -16 10 9 4.68
 1 -16 9 88.29 7.69
 2 -16 8 44.84 6.01
 3 -16 7 86.32 4.84
 0 -17 10 -0.55 4.6
 1 -17 9 9.32 4.63
 2 -17 8 28.08 5.3
 3 -17 7 2.79 2.71
 0 -18 10 164.05 10.93
 1 -18 9 19.83 5.1
 2 -18 8 192.88 12.01
 3 -18 7 5.69 2.79
 0 -19 10 10.16 4.7
 1 -19 9 13.04 4.91
 2 -19 8 7.06 4.39
 1 -20 9 58.61 6.88
 2 -20 8 37.27 5.82
 1 -21 9 7.79 4.57
 2 -21 8 -1.12 4.1
 1 -22 9 150.8 11.08
 1 25 8 57.48 6.88
 1 24 8 74.03 7.21
 2 24 7 4.52 4.09
 0 23 9 45.27 6.11
 1 23 8 20.06 4.85
 2 23 7 28.87 4.85
 0 22 9 34.58 5.43
 1 22 8 -4.25 3.85
 2 22 7 7.23 4.07
 0 21 9 97.59 7.76
 1 21 8 5.41 4.04
 2 21 7 111.84 8
 3 21 6 38.45 5.48
 0 20 9 24.55 4.76
 1 20 8 57.59 5.98
 2 20 7 60.13 5.78
 3 20 6 108.36 7.82
 0 19 9 5.11 3.91
 1 19 8 44.43 5.27
 2 19 7 7.2 3.64
 3 19 6 103.78 7.46
 -1 18 10 38.99 5.26
 0 18 9 33.48 4.94
 1 18 8 28.24 4.61
 2 18 7 5.63 3.63
 3 18 6 53.09 5.73
 -1 17 10 70.85 6.36
 0 17 9 89.07 6.95
 1 17 8 124.52 8.45
 2 17 7 140.87 8.68
 3 17 6 25.05 4.27
 -1 16 10 12.3 4.07
 0 16 9 118.45 8.27
 1 16 8 -0.27 3.5
 2 16 7 190.6 10.31
 3 16 6 -0.2 3.37
 -1 15 10 23.94 4.36
 0 15 9 63.93 5.59
 1 15 8 20.65 4.12
 2 15 7 140.57 8.72
 3 15 6 8.3 3.68
 -1 14 10 43.8 5.13
 0 14 9 33.88 4.58
 1 14 8 38.38 4.59
 2 14 7 116.36 7.35
 3 14 6 15.97 3.88
 4 14 5 53.02 5.99
 -1 13 10 186.13 10.53
 0 13 9 34.22 4.32
 1 13 8 387.31 18.12
 2 13 7 26.77 3.9
 3 13 6 101.13 7.05
 4 13 5 6.27 4.16
 0 12 9 6.65 3.36
 1 12 8 192.2 10.01
 2 12 7 84.23 6.08
 3 12 6 83.58 6.34
 4 12 5 2.47 3.71
 -1 11 10 78.36 6.57
 0 11 9 83.17 6.09
 1 11 8 107.37 7.15
 2 11 7 90.53 6.37
 3 11 6 177.64 9.83
 4 11 5 89.57 6.89
 -1 10 10 45.4 5.38
 0 10 9 71.08 5.51
 1 10 8 62 5.25
 2 10 7 186.81 9.81
 3 10 6 52.48 4.94
 4 10 5 64.22 5.8
 -1 9 10 3.91 3.87
 0 9 9 453.44 19.94
 1 9 8 21.98 3.55
 2 9 7 236.29 11.74
 3 9 6 48.09 4.9
 4 9 5 103.33 7.26
 -1 8 10 6.71 3.8
 0 8 9 141.18 5.72
 1 8 8 129.87 7.49
 2 8 7 39.19 4.13
 3 8 6 34.08 4.08
 4 8 5 107.31 7.74
 -1 7 10 55.41 5.59
 0 7 9 39.36 3.13
 1 7 8 252.34 12.33
 2 7 7 81.42 5.61
 3 7 6 173.11 9.46
 4 7 5 13.03 4
 -1 6 10 72.75 6.21
 0 6 9 76.32 4.02
 1 6 8 307.86 14.6
 2 6 7 3.52 2.83
 3 6 6 138.43 8.48
 4 6 5 1.54 3.45
 -1 5 10 233.37 13.19
 0 5 9 91.89 4.43
 1 5 8 217.71 11.02
 2 5 7 1.63 2.68
 3 5 6 224.71 11.4
 4 5 5 8.26 3.36
 -1 4 10 39.63 5.29
 0 4 9 38.68 2.97
 1 4 8 2.93 2.03
 2 4 7 86.3 5.8
 3 4 6 43.95 4.57
 4 4 5 69.67 5.76
 -2 3 11 40.96 5.71
 -1 3 10 16.41 4.32
 0 3 9 173.41 6.63
 1 3 8 20.31 2.37
 2 3 7 174.32 9.02
 3 3 6 7.17 2.94
 4 3 5 65.06 5.8
 -2 2 11 5.86 4.16
 -1 2 10 2.95 3.77
 0 2 9 216.92 7.77
 1 2 8 53.72 3.25
 2 2 7 163 8.74
 3 2 6 48.28 4.58
 4 2 5 62.77 5.67
 -2 1 11 19.94 4.96
 -1 1 10 107.48 8.13
 0 1 9 82.86 6.02
 1 1 8 68.5 3.61
 2 1 7 176.03 6.7
 3 1 6 19.38 3.42
 4 1 5 58.77 5.37
 -2 0 11 -1.7 4.35
 -1 0 10 27.35 4.62
 0 0 9 3.12 3.4
 1 0 8 37.03 2.79
 2 0 7 1.06 1.89
 3 0 6 115.26 7.1
 4 0 5 2.57 3.29
 -2 -1 11 18.72 4.98
 -1 -1 10 113.35 8.18
 0 -1 9 70.15 6.03
 1 -1 8 70.83 3.65
 2 -1 7 185.41 6.81
 3 -1 6 18.91 3.45
 4 -1 5 54.91 5.34
 -2 -2 11 -1.06 4.37
 -1 -2 10 5.14 3.99
 0 -2 9 207.9 11.81
 1 -2 8 53.84 3.18
 2 -2 7 175.96 6.53
 3 -2 6 49.87 4.44
 4 -2 5 66.27 5.73
 -2 -3 11 40.56 5.88
 -1 -3 10 18.68 4.43
 0 -3 9 187.56 10.45
 1 -3 8 18.99 2.2
 2 -3 7 171.16 6.6
 3 -3 6 4.66 2.06
 4 -3 5 74.2 6
 -1 -4 10 36.39 5.15
 0 -4 9 42.5 5
 1 -4 8 3.64 1.88
 2 -4 7 86.07 4.2
 3 -4 6 49.78 3.23
 4 -4 5 57.06 5.51
 -1 -5 10 217.97 13.3
 0 -5 9 92.07 7.07
 1 -5 8 215.29 8
 2 -5 7 3.07 1.97
 3 -5 6 226.1 8.2
 4 -5 5 3.01 3.24
 -1 -6 10 72.16 6.49
 0 -6 9 85.82 6.65
 1 -6 8 325.81 10.66
 2 -6 7 2.28 1.91
 3 -6 6 149.42 6.16
 4 -6 5 4.24 3.14
 -1 -7 10 57.91 5.88
 0 -7 9 36.51 4.86
 1 -7 8 257.41 8.95
 2 -7 7 74.16 3.95
 3 -7 6 175.17 6.84
 4 -7 5 17.05 3.06
 -1 -8 10 5.5 3.96
 0 -8 9 117.59 8.65
 1 -8 8 134.05 5.39
 2 -8 7 30.23 2.71
 3 -8 6 30.16 2.85
 4 -8 5 121.22 5.77
 -1 -9 10 5.83 4.17
 0 -9 9 453.56 22.07
 1 -9 8 25.58 4.28
 2 -9 7 234.3 8.53
 3 -9 6 46.8 3.39
 4 -9 5 96.44 5.27
 -1 -10 10 34.94 5.49
 0 -10 9 80.02 6.71
 1 -10 8 62.57 6.12
 2 -10 7 174.04 6.95
 3 -10 6 54.06 3.62
 4 -10 5 57.79 4.22
 -1 -11 10 79.45 7.05
 0 -11 9 94.24 7.31
 1 -11 8 112.68 8.26
 2 -11 7 89.18 4.42
 3 -11 6 177.09 7.11
 4 -11 5 85.31 5.05
 -1 -12 10 134.63 9.45
 0 -12 9 9.2 4.13
 1 -12 8 183.46 11.1
 2 -12 7 79.86 4.15
 3 -12 6 81.72 4.53
 4 -12 5 3.85 2.85
 -1 -13 10 211.36 12.32
 0 -13 9 33.9 5.36
 1 -13 8 381.83 19.89
 2 -13 7 22.87 2.62
 3 -13 6 95.27 4.93
 4 -13 5 8.04 3
 -1 -14 10 51.92 6.18
 0 -14 9 42.86 5.63
 1 -14 8 40.68 5.33
 2 -14 7 98.86 4.95
 3 -14 6 18.31 2.76
 4 -14 5 58.16 4.37
 -1 -15 10 19.86 5.05
 0 -15 9 61.3 6.55
 1 -15 8 23.93 4.82
 2 -15 7 140.89 6.02
 3 -15 6 8.48 2.46
 -1 -16 10 4.51 4.68
 0 -16 9 138.38 9.6
 1 -16 8 0.43 3.72
 2 -16 7 168.91 6.97
 3 -16 6 2.85 2.5
 -1 -17 10 69.6 7.33
 0 -17 9 101 7.98
 1 -17 8 127.09 9.33
 2 -17 7 130.95 5.87
 3 -17 6 10.02 2.65
 -1 -18 10 40.26 6.17
 0 -18 9 35.84 5.71
 1 -18 8 23.8 4.77
 2 -18 7 5.38 3.93
 3 -18 6 54.18 5.99
 0 -19 9 0.79 4.1
 1 -19 8 43.19 5.79
 2 -19 7 2.95 3.94
 3 -19 6 79.45 7.38
 0 -20 9 21.92 4.99
 1 -20 8 60.44 6.54
 2 -20 7 54.73 6.26
 3 -20 6 101.89 8.2
 0 -21 9 93.82 8.24
 1 -21 8 -2.39 3.98
 2 -21 7 112.24 8.59
 3 -21 6 38.71 5.67
 0 -22 9 39.51 5.97
 1 -22 8 -3.96 3.97
 2 -22 7 7.65 4.22
 0 -23 9 58.24 6.86
 1 -23 8 11.88 4.75
 2 -23 7 24.39 5.01
 1 -24 8 70.04 7.33
 2 -24 7 8.08 4.11
 1 -25 8 59.83 6.85
 1 27 7 115.41 8.86
 2 27 6 44.93 5.84
 0 26 8 7.88 4.63
 1 26 7 14.35 4.71
 2 26 6 0.31 4.04
 0 25 8 150.01 10.52
 1 25 7 15.1 4.63
 2 25 6 81.28 7.23
 0 24 8 2.68 3.87
 1 24 7 0.17 3.81
 2 24 6 12.6 4.27
 0 23 8 93.06 7.67
 1 23 7 80.81 7
 2 23 6 74.47 6.54
 3 23 5 198.7 11.43
 -1 22 9 21.92 5.16
 0 22 8 -3.23 3.57
 1 22 7 28.14 4.78
 2 22 6 19.26 4.23
 3 22 5 8.46 4.26
 -1 21 9 150.56 10.46
 0 21 8 15.3 4.3
 1 21 7 166.51 9.91
 2 21 6 -0.1 3.25
 3 21 5 229.3 12.31
 -1 20 9 1.69 4.12
 0 20 8 1.2 3.64
 1 20 7 6.87 3.81
 2 20 6 19.02 3.96
 3 20 5 -0.58 3.47
 -1 19 9 33.98 5.3
 0 19 8 138.82 8.97
 1 19 7 34.57 4.69
 2 19 6 163.55 9.38
 3 19 5 2.94 3.86
 -1 18 9 3.76 3.86
 0 18 8 41.58 4.93
 1 18 7 8.01 3.53
 2 18 6 2.52 3.06
 3 18 5 -0.07 3.26
 -1 17 9 70.96 6.26
 0 17 8 78.17 6.27
 1 17 7 78.03 6.06
 2 17 6 203.08 11.13
 3 17 5 72.78 6.01
 -1 16 9 0.74 3.67
 0 16 8 17.05 3.6
 1 16 7 14.53 3.59
 2 16 6 0.67 2.93
 3 16 5 1.73 3.24
 4 16 4 3.41 4.23
 -1 15 9 266.15 13.76
 0 15 8 8.22 3.17
 1 15 7 96.84 6.59
 2 15 6 15.48 3.47
 3 15 5 139.67 8.41
 4 15 4 12.1 4.29
 -2 14 10 5.68 4.54
 -1 14 9 12.6 3.79
 0 14 8 8.83 3.1
 1 14 7 -2.53 2.91
 2 14 6 34.07 4.21
 3 14 5 5.11 3.21
 4 14 4 4.14 3.89
 -2 13 10 75.36 7.11
 -1 13 9 29.34 3.14
 0 13 8 136.75 8.31
 1 13 7 0.91 2.96
 2 13 6 276.03 13.76
 3 13 5 80.6 5.86
 4 13 4 214.33 11.42
 -2 12 10 6.52 4.56
 -1 12 9 4.16 2.37
 0 12 8 29.31 3.8
 1 12 7 25.04 3.75
 2 12 6 3.05 2.91
 3 12 5 3.18 3
 4 12 4 18.98 4.14
 -2 11 10 47 5.8
 -1 11 9 163.03 6.61
 0 11 8 110.56 7.05
 1 11 7 263.58 12.99
 2 11 6 38.76 4.18
 3 11 5 55.42 4.81
 4 11 4 34.46 4.72
 -2 10 10 13.54 4.48
 -1 10 9 9.53 2.34
 0 10 8 4.05 2.13
 1 10 7 12.74 3
 2 10 6 64.62 5.14
 3 10 5 25.98 3.73
 4 10 4 4.97 3.55
 -2 9 10 2.09 4.1
 -1 9 9 240.42 8.48
 0 9 8 26.91 2.59
 1 9 7 258.94 12.33
 2 9 6 57.91 4.74
 3 9 5 549.28 23.44
 4 9 4 14.36 3.83
 -2 8 10 4.36 3.98
 -1 8 9 4.28 3.53
 0 8 8 9.67 2.26
 1 8 7 48.62 4.19
 2 8 6 7.36 2.74
 3 8 5 24.98 3.69
 4 8 4 21.59 3.95
 -2 7 10 98.26 7.65
 -1 7 9 1.18 3.33
 0 7 8 886.29 27.03
 1 7 7 3.49 2.55
 2 7 6 479.2 19.9
 3 7 5 5.74 3.04
 4 7 4 54 5.11
 -2 6 10 3.93 3.88
 -1 6 9 43.32 4.83
 1 6 7 24.31 2.22
 2 6 6 2.91 2.53
 3 6 5 45.84 4.52
 4 6 4 24.97 4.04
 -2 5 10 120.24 8.58
 -1 5 9 78.16 6.22
 0 5 8 425.35 13.51
 1 5 7 386.01 12.84
 2 5 6 455.61 19.66
 3 5 5 291.81 13.92
 4 5 4 161.03 8.81
 -2 4 10 1.27 3.85
 -1 4 9 45.94 4.92
 1 4 7 30.26 2.44
 2 4 6 125.42 7.27
 3 4 5 101.86 6.39
 4 4 4 1.2 3.13
 -2 3 10 9.61 4
 -1 3 9 314.85 16.4
 0 3 8 307.99 10.02
 1 3 7 1578.88 46.17
 2 3 6 53.78 4.35
 3 3 5 262.93 12.91
 4 3 4 5.38 3.2
 -2 2 10 5.25 3.85
 -1 2 9 18.11 3.77
 0 2 8 60.17 3.29
 1 2 7 44.25 3.15
 2 2 6 32.47 3.48
 3 2 5 10.85 2.89
 4 2 4 13.49 3.45
 -2 1 10 106.38 8.03
 -1 1 9 144.39 8.83
 0 1 8 606.87 18.88
 1 1 7 815.72 24.76
 2 1 6 862.46 26.07
 3 1 5 21.54 3.41
 4 1 4 215.26 11.52
 -2 0 10 10.97 4.21
 -1 0 9 2.14 3.47
 0 0 8 81.62 3.87
 1 0 7 0.33 1.86
 2 0 6 399.12 12.51
 3 0 5 0.63 2.57
 4 0 4 14.15 3.57
 -2 -1 10 112.59 8.14
 -1 -1 9 140.7 8.76
 0 -1 8 615.33 18.87
 1 -1 7 813.84 24.75
 2 -1 6 872.65 26.16
 3 -1 5 21.28 2.33
 4 -1 4 221.85 11.56
 -2 -2 10 7.52 3.93
 -1 -2 9 11.75 3.88
 0 -2 8 65.22 3.26
 1 -2 7 40.69 3.59
 2 -2 6 32.68 2.59
 3 -2 5 22.05 2.72
 4 -2 4 2.31 3.11
 -2 -3 10 6.5 4.04
 -1 -3 9 329.52 16.71
 0 -3 8 288.29 15.04
 1 -3 7 1547.29 46.15
 2 -3 6 58.41 3.23
 3 -3 5 268.13 9.32
 4 -3 4 9.97 3.31
 -2 -4 10 13.77 4.25
 -1 -4 9 56.42 5.36
 0 -4 8 17.06 3.76
 1 -4 7 27.47 2.91
 2 -4 6 136.9 5.42
 3 -4 5 95.34 4.5
 4 -4 4 6.93 2.46
 -2 -5 10 133.55 8.94
 -1 -5 9 72.89 6.21
 0 -5 8 432.88 20.28
 1 -5 7 402.49 12.93
 2 -5 6 445.71 14.29
 3 -5 5 297.44 10.14
 4 -5 4 134.75 6.17
 -2 -6 10 10.58 4.35
 -1 -6 9 49.81 5.15
 0 -6 8 23.55 4.1
 1 -6 7 19.37 2.07
 2 -6 6 1.64 1.79
 3 -6 5 46.81 3.19
 4 -6 4 29.42 3.11
 -2 -7 10 101.65 7.82
 -1 -7 9 2.48 3.52
 0 -7 8 891.29 40.16
 1 -7 7 0.38 1.68
 2 -7 6 438.14 14.37
 3 -7 5 6.4 2.19
 4 -7 4 53.33 3.86
 -2 -8 10 16.41 4.44
 -1 -8 9 2.47 3.52
 1 -8 7 47.57 2.93
 2 -8 6 5.25 1.86
 3 -8 5 34.32 2.95
 4 -8 4 20.35 3.67
 -2 -9 10 5.43 4.03
 -1 -9 9 232.12 12.86
 0 -9 8 29.44 4.27
 1 -9 7 248.26 8.78
 2 -9 6 65.21 3.51
 3 -9 5 516.5 17.01
 4 -9 4 6.76 2.66
 -2 -10 10 11.42 4.45
 -1 -10 9 11.66 4.04
 0 -10 8 6.59 3.46
 1 -10 7 11.9 1.91
 2 -10 6 69.95 3.67
 3 -10 5 23.14 2.72
 4 -10 4 2.64 2.58
 -2 -11 10 48.1 6.02
 -1 -11 9 167.46 10.3
 0 -11 8 119.57 8.17
 1 -11 7 268.59 9.2
 2 -11 6 43.65 3.02
 3 -11 5 56.97 3.65
 4 -11 4 34.33 3.47
 -2 -12 10 9.06 4.46
 -1 -12 9 7.29 4
 0 -12 8 29.15 4.61
 1 -12 7 19.61 2.09
 2 -12 6 3.73 1.98
 3 -12 5 5.81 2.24
 4 -12 4 28.87 3.42
 -2 -13 10 77.3 7.24
 -1 -13 9 33.89 5.03
 0 -13 8 159.81 9.78
 1 -13 7 6.07 3.47
 2 -13 6 284.96 9.93
 3 -13 5 76.38 4.29
 4 -13 4 210.77 8.43
 -2 -14 10 10.26 4.52
 -1 -14 9 3.18 4.13
 0 -14 8 13.26 4.3
 1 -14 7 -0.59 3.2
 2 -14 6 32.97 2.83
 3 -14 5 7.9 2.42
 4 -14 4 8.15 4.77
 -1 -15 9 287.95 15.19
 0 -15 8 9.73 4.07
 1 -15 7 89.8 7.26
 2 -15 6 17.25 2.43
 3 -15 5 131.42 6.1
 4 -15 4 4.81 4.87
 -1 -16 9 2.2 4.06
 0 -16 8 10.73 4.18
 1 -16 7 5.33 3.7
 2 -16 6 3.33 2.12
 3 -16 5 -2.13 2.32
 4 -16 4 14.23 5.39
 -1 -17 9 63.06 6.67
 0 -17 8 85.77 7.2
 1 -17 7 61.38 6.18
 2 -17 6 213.12 7.9
 3 -17 5 72.74 6.74
 4 -17 4 146.78 10.3
 -1 -18 9 -0.92 4.04
 0 -18 8 49.24 5.69
 1 -18 7 5.26 3.77
 2 -18 6 5.22 3.68
 3 -18 5 0.02 3.71
 -1 -19 9 36.49 5.79
 0 -19 8 142.4 9.6
 1 -19 7 33.59 5.11
 2 -19 6 148.96 9.98
 3 -19 5 -0.51 3.97
 -1 -20 9 3.25 4.66
 0 -20 8 2.08 3.71
 1 -20 7 4.16 3.9
 2 -20 6 17.26 4.24
 3 -20 5 0.68 4.17
 -1 -21 9 177.63 11.63
 0 -21 8 23.14 4.79
 1 -21 7 158.66 10.51
 2 -21 6 1.28 3.38
 3 -21 5 220.18 13.4
 -1 -22 9 15.47 5.41
 0 -22 8 -2.88 3.76
 1 -22 7 29.48 4.92
 2 -22 6 15.47 4.24
 3 -22 5 5.56 4.72
 0 -23 8 100.16 8.4
 1 -23 7 81.59 7.19
 2 -23 6 69.97 6.78
 3 -23 5 202.94 12.45
 0 -24 8 -1 4.27
 1 -24 7 -1.87 3.78
 2 -24 6 9.6 3.92
 0 -25 8 166.83 11.27
 1 -25 7 24.34 5.03
 2 -25 6 86.24 7.43
 0 -26 8 18.13 5.28
 1 -26 7 28.55 5.05
 2 -26 6 2.36 3.96
 1 -27 7 124.55 9.33
 2 -27 6 46.13 5.9
 1 29 6 98.09 8.07
 0 28 7 75.32 7.21
 1 28 6 -4.58 3.89
 2 28 5 20.35 4.9
 0 27 7 103.79 8.28
 1 27 6 39.12 5.39
 2 27 5 141.05 9.12
 0 26 7 74.12 7.04
 1 26 6 35.78 5.28
 2 26 5 20.56 4.56
 -1 25 8 72.45 7.31
 0 25 7 36.1 5.71
 1 25 6 134.83 8.89
 2 25 5 4.7 4.03
 3 25 4 140.54 9.1
 -1 24 8 89.76 7.84
 0 24 7 7.8 4.22
 1 24 6 13.79 4.23
 2 24 5 6.31 3.77
 3 24 4 14.01 4.12
 -1 23 8 13.86 4.47
 0 23 7 159.68 10.16
 1 23 6 105.24 7.55
 2 23 5 80.1 6.41
 3 23 4 91.29 7.04
 -1 22 8 27.03 5.15
 0 22 7 70.35 6.45
 1 22 6 8.03 3.67
 2 22 5 134.93 8.54
 3 22 4 4.5 3.8
 -1 21 8 9.35 4.21
 0 21 7 280.95 14.61
 1 21 6 8.1 3.74
 2 21 5 139.26 8.7
 3 21 4 66.6 5.97
 -1 20 8 74.55 6.77
 0 20 7 37.51 4.86
 1 20 6 0.85 3.26
 2 20 5 11.75 3.46
 3 20 4 13.79 3.85
 -2 19 9 5.29 4.71
 -1 19 8 145.09 9.45
 0 19 7 4.78 3.52
 1 19 6 166.34 9.47
 2 19 5 66.66 5.46
 3 19 4 215.37 11.11
 -2 18 9 -1.17 2.98
 -1 18 8 86.95 6.87
 0 18 7 14.76 3.58
 1 18 6 119.44 7.77
 2 18 5 38.35 4.44
 3 18 4 74.08 5.87
 4 18 3 2.58 4.16
 -2 17 9 19.61 3.45
 -1 17 8 174.85 10.34
 0 17 7 151.89 8.65
 1 17 6 207.5 10.96
 2 17 5 167.29 9.34
 3 17 4 24.28 3.94
 4 17 3 91.98 7.08
 -2 16 9 76.18 4.95
 -1 16 8 5.25 3.44
 0 16 7 42.23 4.51
 1 16 6 24.47 3.91
 2 16 5 27.78 3.84
 3 16 4 11.73 3.4
 4 16 3 59.29 5.69
 -2 15 9 96.74 5.22
 -1 15 8 12.6 2.65
 0 15 7 143.03 8.19
 1 15 6 17.99 3.46
 2 15 5 312.67 14.75
 3 15 4 7.86 3.19
 4 15 3 319.63 15.81
 -2 14 9 50.24 5.59
 -1 14 8 44.7 3.36
 0 14 7 49.91 4.65
 1 14 6 253.89 12.12
 2 14 5 41.27 4.26
 3 14 4 35.82 4.15
 4 14 3 17.44 4.1
 -2 13 9 57.85 5.98
 -1 13 8 261.48 9.09
 0 13 7 90.23 6.03
 1 13 6 445.14 20.12
 2 13 5 5.43 2.77
 3 13 4 161.49 8.77
 4 13 3 12.83 3.49
 -2 12 9 0.39 3.75
 -1 12 8 72.88 3.89
 0 12 7 7.79 2.71
 1 12 6 116.62 7.13
 2 12 5 73.41 5.26
 3 12 4 113.38 6.89
 4 12 3 27.56 4.2
 -2 11 9 62.64 5.99
 -1 11 8 92 4.4
 0 11 7 62.5 3.24
 1 11 6 162.49 8.6
 2 11 5 237.23 11.26
 3 11 4 418.8 18.69
 4 11 3 46.13 4.88
 -2 10 9 31.93 5.09
 -1 10 8 15.6 2.43
 0 10 7 255.21 8.73
 1 10 6 21.1 3.39
 2 10 5 146.58 7.79
 3 10 4 20.92 3.49
 4 10 3 14.03 3.8
 -2 9 9 266.81 13.85
 -1 9 8 13.39 2.27
 0 9 7 597.19 18.65
 1 9 6 109.32 5.95
 2 9 5 326.78 14.51
 3 9 4 5.52 2.74
 4 9 3 114.22 7.58
 -2 8 9 75.63 6.36
 -1 8 8 8.11 2.07
 0 8 7 172.18 6.3
 1 8 6 30.25 3.37
 2 8 5 317.68 15.23
 3 8 4 5.37 2.72
 4 8 3 8.96 3.42
 -2 7 9 6.16 3.77
 -1 7 8 99.83 4.38
 0 7 7 82.6 3.82
 1 7 6 463.85 14.16
 2 7 5 39.6 3.68
 3 7 4 470.25 20.24
 4 7 3 66.05 5.57
 -2 6 9 9.63 3.8
 -1 6 8 131.61 5.23
 0 6 7 128.21 5
 1 6 6 78.52 3.48
 2 6 5 5.06 2.45
 3 6 4 47.55 4.3
 4 6 3 5.89 3.07
 -2 5 9 60.56 5.66
 -1 5 8 376.06 11.96
 0 5 7 179.88 6.36
 1 5 6 387.24 12.23
 2 5 5 155.24 7.82
 3 5 4 262.6 12.93
 4 5 3 5.17 3.14
 -2 4 9 42.6 5.13
 -1 4 8 109.54 4.34
 0 4 7 241.37 8.02
 1 4 6 162.24 6.13
 2 4 5 138 5.11
 3 4 4 57.08 4.75
 4 4 3 24.14 3.71
 -2 3 9 83.01 6.66
 -1 3 8 17.24 3.5
 0 3 7 471.72 14.17
 1 3 6 45.46 2.69
 2 3 5 612.76 18.03
 3 3 4 33.6 3.73
 4 3 3 222.36 11.53
 -2 2 9 98.03 7.27
 -1 2 8 47.44 4.7
 0 2 7 47.45 2.74
 1 2 6 48.12 2.67
 2 2 5 8.2 1.73
 3 2 4 6.67 2.8
 4 2 3 36.05 4.27
 -2 1 9 17.86 4.01
 -1 1 8 276.76 14.03
 0 1 7 161.45 5.76
 1 1 6 511.66 16.3
 2 1 5 311.11 10.08
 3 1 4 143.09 5.34
 4 1 3 109.63 7.18
 -2 0 9 0.65 3.35
 -1 0 8 216.12 11.28
 0 0 7 2.3 1.63
 1 0 6 444.06 14.36
 2 0 5 5.81 1.95
 3 0 4 110.49 4.6
 4 0 3 7.67 3.25
 -2 -1 9 16.12 3.87
 -1 -1 8 290.28 14.09
 0 -1 7 160.79 5.77
 1 -1 6 531.53 16.37
 2 -1 5 317.68 10.18
 3 -1 4 133.2 5.35
 4 -1 3 117.57 7.26
 -2 -2 9 103.41 7.38
 -1 -2 8 66.43 5.31
 0 -2 7 43.75 2.59
 1 -2 6 47.54 2.64
 2 -2 5 19.15 2.63
 3 -2 4 4.02 1.83
 4 -2 3 39.87 4.42
 -2 -3 9 94 6.96
 -1 -3 8 18.33 3.63
 0 -3 7 442.98 14.03
 1 -3 6 49.53 2.66
 2 -3 5 594.64 18.2
 3 -3 4 41.27 2.79
 4 -3 3 225.59 11.64
 -2 -4 9 47.73 5.22
 -1 -4 8 94.82 6.8
 0 -4 7 229.44 7.88
 1 -4 6 176.26 6.21
 2 -4 5 136.06 5.33
 3 -4 4 70.97 3.66
 4 -4 3 17.02 2.7
 -2 -5 9 62.39 5.73
 -1 -5 8 370.98 18.02
 0 -5 7 181.47 6.2
 1 -5 6 394.69 12.3
 2 -5 5 139.81 5.6
 3 -5 4 290.51 9.55
 4 -5 3 4.58 2.4
 -2 -6 9 9.54 3.92
 -1 -6 8 128.18 8.11
 0 -6 7 134.36 4.85
 1 -6 6 76.81 3.51
 2 -6 5 4.97 1.64
 3 -6 4 55.45 4.34
 4 -6 3 12.36 2.6
 -2 -7 9 3.11 3.58
 -1 -7 8 104.76 6.93
 0 -7 7 94.44 6.23
 1 -7 6 450.76 14.23
 2 -7 5 39.72 2.71
 3 -7 4 465.05 14.75
 4 -7 3 75.17 4.31
 -2 -8 9 68.64 6.32
 -1 -8 8 15.8 3.74
 0 -8 7 175.54 9.8
 1 -8 6 30.75 2.23
 2 -8 5 341.26 11.19
 3 -8 4 0.77 1.91
 4 -8 3 14.94 2.93
 -2 -9 9 255.5 14
 -1 -9 8 13.17 3.8
 0 -9 7 611.14 27.86
 1 -9 6 88.68 3.89
 2 -9 5 313.74 10.52
 3 -9 4 5.81 2.18
 4 -9 3 126.26 5.71
 -2 -10 9 40.56 5.21
 -1 -10 8 11.66 3.59
 0 -10 7 280.55 13.54
 1 -10 6 21.1 2.04
 2 -10 5 141.92 5.6
 3 -10 4 27.39 2.75
 4 -10 3 15.29 2.9
 -2 -11 9 44.94 5.71
 -1 -11 8 87.43 6.63
 0 -11 7 60.74 5.32
 1 -11 6 163.09 5.99
 2 -11 5 225.03 8.12
 3 -11 4 417.1 13.76
 4 -11 3 50.2 3.85
 -2 -12 9 -0.31 3.86
 -1 -12 8 66.24 5.89
 0 -12 7 5.61 3.51
 1 -12 6 124.12 4.94
 2 -12 5 70.37 3.72
 3 -12 4 109.28 5.19
 4 -12 3 26.84 5.12
 -2 -13 9 68.57 6.48
 -1 -13 8 273.51 13.78
 0 -13 7 95.78 6.98
 1 -13 6 453.04 14.42
 2 -13 5 6.7 2
 3 -13 4 153.5 6.5
 4 -13 3 15.84 4.78
 -2 -14 9 48.09 6
 -1 -14 8 46.65 5.19
 0 -14 7 53.44 5.48
 1 -14 6 243.96 8.47
 2 -14 5 42.31 2.99
 3 -14 4 35.54 3.09
 4 -14 3 33.15 5.72
 -2 -15 9 88.53 7.55
 -1 -15 8 17.21 4.16
 0 -15 7 154.03 9.14
 1 -15 6 14.27 2.02
 2 -15 5 316.16 10.61
 3 -15 4 10.16 2.47
 4 -15 3 330.78 17.78
 -2 -16 9 78.06 7.05
 -1 -16 8 11.45 3.92
 0 -16 7 37.33 5.05
 1 -16 6 32.32 2.49
 2 -16 5 28.83 2.63
 3 -16 4 5.84 3.81
 4 -16 3 60.51 6.9
 -2 -17 9 20.22 4.93
 -1 -17 8 193.82 11.07
 0 -17 7 137.97 9.16
 1 -17 6 188.78 11.65
 2 -17 5 170.41 10.21
 3 -17 4 27.17 4.69
 4 -17 3 91.2 8.38
 -2 -18 9 15 4.67
 -1 -18 8 87.14 7.1
 0 -18 7 14.59 3.91
 1 -18 6 123.27 8.41
 2 -18 5 42.04 4.99
 3 -18 4 71.22 6.88
 4 -18 3 -6.54 4.75
 -2 -19 9 3.81 4.41
 -1 -19 8 156.27 6.48
 0 -19 7 7.46 3.77
 1 -19 6 164.47 10.18
 2 -19 5 60.1 5.73
 3 -19 4 203.15 12.24
 -1 -20 8 78.86 7.07
 0 -20 7 37.02 4.98
 1 -20 6 9.51 3.69
 2 -20 5 10.02 3.56
 3 -20 4 17.12 4.6
 -1 -21 8 5.33 4.33
 0 -21 7 266.52 15.12
 1 -21 6 3.82 3.57
 2 -21 5 135.09 9.22
 3 -21 4 67.19 6.86
 -1 -22 8 30.85 5.4
 0 -22 7 70.84 6.59
 1 -22 6 6.63 3.61
 2 -22 5 121.74 8.98
 3 -22 4 3.96 4.39
 -1 -23 8 12.89 4.73
 0 -23 7 159.34 10.5
 1 -23 6 94.19 7.59
 3 -23 4 92.42 7.92
 -1 -24 8 81.3 7.68
 0 -24 7 9.32 4.39
 1 -24 6 15.66 4.3
 2 -24 5 -1.03 3.52
 3 -24 4 15.73 4.89
 -1 -25 8 72.98 7.37
 0 -25 7 38.47 5.71
 1 -25 6 121.51 9.06
 2 -25 5 7.56 4.11
 3 -25 4 126.81 9.75
 0 -26 7 74.05 7.27
 1 -26 6 35.69 5.33
 2 -26 5 16.7 4.59
 0 -27 7 93.94 8.06
 1 -27 6 35.81 5.33
 2 -27 5 133.45 9.38
 0 -28 7 52.84 6.71
 1 -28 6 0.49 3.87
 2 -28 5 17.35 4.68
 1 -29 6 91.6 7.83
 1 31 5 1 4.19
 0 30 6 65.46 7.12
 1 30 5 26.75 4.93
 2 30 4 30.85 5.27
 0 29 6 15.03 4.93
 1 29 5 29.46 5.07
 2 29 4 5.89 4.21
 -1 28 7 97.15 8.62
 0 28 6 32.94 5.49
 1 28 5 136.63 9.11
 2 28 4 33.98 5.15
 -1 27 7 15.52 5.44
 0 27 6 4.24 4.32
 1 27 5 70.65 6.57
 2 27 4 19.72 4.52
 -1 26 7 56.27 6.74
 0 26 6 67.24 6.68
 1 26 5 3.35 3.64
 2 26 4 3.24 3.67
 -1 25 7 -0.15 4.59
 0 25 6 59.08 6.14
 1 25 5 -1.54 3.26
 2 25 4 2.53 3.53
 -1 24 7 1.55 4.5
 0 24 6 182.65 11
 1 24 5 17.56 4.14
 2 24 4 245.8 12.78
 3 24 3 21.4 4.26
 -1 23 7 -1.48 4.26
 0 23 6 122.54 8.47
 1 23 5 47.13 5.03
 2 23 4 15.89 3.96
 3 23 3 56.07 5.53
 -2 22 8 4.95 4.87
 -1 22 7 104.53 8.4
 0 22 6 3.14 3.66
 1 22 5 6.55 3.42
 2 22 4 0.15 3.16
 3 22 3 95.43 6.91
 -2 21 8 15.8 4.92
 -1 21 7 24.75 4.88
 0 21 6 29.62 4.61
 1 21 5 0.37 3.13
 2 21 4 0.34 2.93
 3 21 3 62.64 5.5
 -2 20 8 47.07 4.2
 -1 20 7 110.3 8.3
 0 20 6 256.66 13.04
 1 20 5 102.12 6.87
 2 20 4 334.41 15.85
 3 20 3 50.25 5.22
 -2 19 8 15.12 3.25
 -1 19 7 32.22 4.91
 0 19 6 113.58 7.43
 1 19 5 37.03 4.27
 2 19 4 25.7 3.76
 3 19 3 15.69 3.53
 -2 18 8 116.02 5.83
 -1 18 7 45.1 5.19
 0 18 6 55.58 5.2
 1 18 5 4.67 3.22
 2 18 4 141.12 8.16
 3 18 3 21.36 3.73
 -2 17 8 2.79 2.85
 -1 17 7 24.38 2.94
 0 17 6 0.76 2.95
 1 17 5 23.7 3.81
 2 17 4 38.73 4.06
 3 17 3 88.33 6.16
 -2 16 8 10.48 2.98
 -1 16 7 350.58 11.79
 0 16 6 9.92 3.17
 1 16 5 757.25 31.25
 2 16 4 27.31 3.46
 3 16 3 360.9 17.23
 -2 15 8 3.98 2.65
 -1 15 7 146.63 5.97
 0 15 6 2.38 2.8
 1 15 5 65.63 5.15
 2 15 4 7.63 2.88
 3 15 3 10.41 3.28
 4 15 2 4.17 3.38
 -2 14 8 156.95 6.83
 -1 14 7 107.8 4.93
 0 14 6 148.3 8.24
 1 14 5 235.98 12.23
 2 14 4 148.09 7.78
 3 14 3 127.79 7.44
 4 14 2 78.24 5.91
 -2 13 8 7.99 2.66
 -1 13 7 12.39 2.24
 0 13 6 30.93 2.49
 1 13 5 22.83 3.21
 2 13 4 250.9 11.54
 3 13 3 2.16 2.47
 4 13 2 202.55 10.69
 -2 12 8 270.2 9.79
 -1 12 7 28.06 2.68
 0 12 6 654.63 19.64
 1 12 5 212.49 10.52
 2 12 4 580.78 24.11
 3 12 3 41.98 3.99
 4 12 2 214.03 11.2
 -2 11 8 28.05 3.08
 -1 11 7 84.4 4.12
 0 11 6 96.19 4.23
 1 11 5 49.94 4.1
 2 11 4 36.62 3.63
 3 11 3 8.27 2.71
 4 11 2 5.54 3.22
 -3 10 9 73.42 7.44
 -2 10 8 5.05 2.39
 -1 10 7 452.04 14.47
 0 10 6 263.84 9.11
 1 10 5 714.08 29.37
 2 10 4 130.82 6.76
 3 10 3 255.35 12.39
 4 10 2 29.27 4.04
 -3 9 9 20.45 4.89
 -2 9 8 12.21 3.71
 -1 9 7 25.59 3.47
 0 9 6 2.83 1.61
 1 9 5 200.9 6.94
 2 9 4 60.67 4.27
 3 9 3 320.04 14.95
 4 9 2 27.93 3.85
 -3 8 9 118.61 8.75
 -2 8 8 93.44 6.7
 -1 8 7 388.58 11.96
 0 8 6 388.74 12.11
 1 8 5 415.16 13.19
 2 8 4 262.58 12.08
 3 8 3 240.62 11.52
 4 8 2 77.78 5.7
 -3 7 9 6.28 4.53
 -2 7 8 36.91 4.72
 -1 7 7 10.16 2.85
 0 7 6 206.66 7.15
 1 7 5 66.69 3.03
 2 7 4 76.09 4.69
 3 7 3 18.74 3.17
 4 7 2 26.78 3.74
 -3 6 9 7.21 4.35
 -2 6 8 227.94 12.07
 -1 6 7 14.8 2.01
 0 6 6 1199.67 35.54
 1 6 5 35.47 2.08
 2 6 4 859.23 25.5
 3 6 3 7.76 2.51
 4 6 2 61.91 5.18
 -3 5 9 -0.32 3.85
 -2 5 8 47.44 4.78
 -1 5 7 11.15 1.87
 0 5 6 85.1 3.81
 1 5 5 155.46 5.39
 2 5 4 260.44 8.53
 3 5 3 194.47 10.04
 4 5 2 59.88 5.01
 -3 4 9 127.1 9.04
 -2 4 8 64.3 5.59
 -1 4 7 364.13 11.58
 0 4 6 198.31 6.79
 1 4 5 452.46 14.3
 2 4 4 67.7 2.96
 3 4 3 226.72 11.24
 4 4 2 73.72 5.61
 -3 3 9 8.66 4.35
 -2 3 8 6.06 3.45
 -1 3 7 94.29 3.94
 0 3 6 53.77 2.68
 1 3 5 170.38 5.75
 2 3 4 16.59 1.63
 3 3 3 185.07 6.48
 4 3 2 8.29 3.15
 -3 2 9 97.86 7.81
 -2 2 8 71.61 5.8
 -1 2 7 377.04 11.51
 0 2 6 350.18 11
 1 2 5 1395.4 41.1
 2 2 4 95.7 3.75
 3 2 3 128.06 5.07
 4 2 2 14.67 3.28
 -3 1 9 11.02 4.4
 -2 1 8 9.44 3.48
 -1 1 7 73.68 3.23
 0 1 6 18.43 1.82
 1 1 5 108.36 4.26
 2 1 4 473.82 14.12
 3 1 3 5.85 1.59
 4 1 2 107.44 6.68
 -3 0 9 5.31 4
 -2 0 8 346.24 16.95
 -1 0 7 2.73 1.58
 0 0 6 392.46 12.21
 1 0 5 -0.24 1.23
 2 0 4 462.53 14.04
 3 0 3 2.5 1.61
 4 0 2 186.81 10.06
 -3 -1 9 1.34 3.82
 -2 -1 8 26.41 4.02
 -1 -1 7 63.48 5.01
 0 -1 6 21.02 1.77
 1 -1 5 109.25 4.25
 2 -1 4 469.92 14.2
 3 -1 3 7.39 1.72
 4 -1 2 95.05 6.52
 -3 -2 9 102.09 7.86
 -2 -2 8 69.88 5.83
 -1 -2 7 364.35 17.21
 0 -2 6 350.13 10.95
 1 -2 5 1380.36 41.11
 2 -2 4 84.73 3.75
 3 -2 3 138.12 5.3
 4 -2 2 9.3 3.23
 -3 -3 9 5.8 4.24
 -2 -3 8 11.68 3.4
 0 -3 6 55.63 2.56
 1 -3 5 161.73 5.74
 2 -3 4 16.22 1.81
 3 -3 3 188.45 6.68
 4 -3 2 11 3.36
 -3 -4 9 127.9 8.96
 -2 -4 8 66.35 5.62
 -1 -4 7 354.94 17.35
 0 -4 6 202.1 6.68
 1 -4 5 477.34 14.42
 2 -4 4 70.62 3.25
 3 -4 3 243.73 8.3
 4 -4 2 80.03 5.82
 -3 -5 9 12.46 4.28
 -2 -5 8 43.42 4.71
 -1 -5 7 25.52 3.5
 0 -5 6 89.54 3.64
 1 -5 5 156.05 5.49
 2 -5 4 272.5 8.89
 3 -5 3 208.29 7.38
 4 -5 2 68.64 5.3
 -3 -6 9 5.87 4.26
 -2 -6 8 222.87 12.19
 -1 -6 7 14.64 3.22
 0 -6 6 1180.68 35.43
 1 -6 5 34.3 2.17
 2 -6 4 871.78 25.92
 3 -6 3 6.1 1.91
 4 -6 2 67.6 5.52
 -3 -7 9 11.45 4.46
 -2 -7 8 46.49 4.82
 -1 -7 7 2.63 2.93
 0 -7 6 213.64 7.03
 1 -7 5 70.27 3.12
 2 -7 4 63.92 3.3
 3 -7 3 28.66 2.53
 4 -7 2 24.29 3.96
 -3 -8 9 124.94 8.72
 -2 -8 8 98.18 7.04
 -1 -8 7 368.76 17.72
 0 -8 6 387.27 11.96
 1 -8 5 430.71 13.38
 2 -8 4 257.49 8.81
 3 -8 3 240.03 8.49
 4 -8 2 73.23 4.34
 -3 -9 9 17.08 4.8
 -2 -9 8 12.81 3.78
 -1 -9 7 22.28 3.73
 0 -9 6 0.04 1.11
 1 -9 5 211.07 7.15
 2 -9 4 57.7 3.11
 3 -9 3 334.36 11.13
 4 -9 2 36.61 3.33
 -3 -10 9 88.71 7.48
 -2 -10 8 0 3.34
 -1 -10 7 482.78 21.63
 0 -10 6 290.03 14.05
 1 -10 5 713.53 21.3
 2 -10 4 116.32 4.81
 3 -10 3 259.75 9.24
 4 -10 2 34.01 5.11
 -2 -11 8 14.25 3.91
 -1 -11 7 85.09 6.24
 0 -11 6 117.84 7.02
 1 -11 5 48.87 2.71
 2 -11 4 35.38 2.62
 3 -11 3 5.79 2.16
 4 -11 2 31.99 5.17
 -2 -12 8 264.9 14.3
 -1 -12 7 31.06 4.01
 0 -12 6 655.3 29.32
 1 -12 5 209.02 7.43
 2 -12 4 566.09 17.54
 3 -12 3 37.11 3.14
 4 -12 2 248.25 13.08
 -2 -13 8 14.43 3.92
 -1 -13 7 6.87 3.37
 0 -13 6 27.38 3.99
 1 -13 5 20.69 1.96
 2 -13 4 234.54 8.29
 3 -13 3 3.29 2.19
 4 -13 2 196.7 12.08
 -2 -14 8 163.98 10
 -1 -14 7 102.75 7.32
 0 -14 6 163.07 9.08
 1 -14 5 258.83 8.74
 2 -14 4 136.42 5.58
 3 -14 3 132.76 8.68
 4 -14 2 67.02 6.94
 -2 -15 8 4.73 3.79
 -1 -15 7 146.28 8.88
 0 -15 6 -1.31 1.61
 1 -15 5 74.17 3.51
 2 -15 4 3.62 1.93
 3 -15 3 12.92 3.9
 4 -15 2 10.58 4.65
 -2 -16 8 9.14 4.05
 -1 -16 7 337.48 17.4
 0 -16 6 8.51 1.91
 1 -16 5 679.41 33.2
 2 -16 4 28.42 4.05
 3 -16 3 396.72 19.29
 4 -16 2 23.54 5.34
 -2 -17 8 3.2 3.79
 -1 -17 7 27.61 4.32
 0 -17 6 1.58 3.06
 1 -17 5 25.43 4.03
 2 -17 4 34.93 4.48
 3 -17 3 82.18 7.01
 4 -17 2 41.53 6.17
 -2 -18 8 113.96 8.21
 -1 -18 7 41.51 5.01
 0 -18 6 60.06 5.38
 1 -18 5 4.44 3.41
 2 -18 4 136.25 8.97
 3 -18 3 26.55 4.71
 4 -18 2 87.58 8.06
 -2 -19 8 10.29 4.17
 -1 -19 7 37.64 3.04
 0 -19 6 107.45 7.46
 1 -19 5 36.08 4.51
 2 -19 4 25.98 4.25
 3 -19 3 12.35 4.04
 4 -19 2 38.19 6.31
 -2 -20 8 42.92 3.56
 -1 -20 7 127.85 5.61
 0 -20 6 251.35 13.46
 1 -20 5 91.92 7
 2 -20 4 322.15 17.15
 3 -20 3 56.61 6.08
 4 -20 2 24.34 5.66
 -2 -21 8 5.54 2.66
 -1 -21 7 17.46 2.81
 0 -21 6 29.48 4.56
 1 -21 5 8.13 3.5
 2 -21 4 4.79 3.63
 3 -21 3 57.76 6.4
 -2 -22 8 5.81 2.76
 -1 -22 7 123.38 5.65
 0 -22 6 -0.12 3.74
 1 -22 5 6.16 3.43
 2 -22 4 -0.34 3.38
 3 -22 3 94.71 7.88
 -1 -23 7 2.43 2.65
 0 -23 6 122.41 8.54
 1 -23 5 47.58 5.38
 2 -23 4 23.69 4.36
 3 -23 3 55.05 6.29
 -1 -24 7 8.55 4.13
 0 -24 6 180.83 11.35
 1 -24 5 17.23 4.12
 2 -24 4 246.1 13.85
 3 -24 3 17.34 4.77
 -1 -25 7 4.46 4.15
 0 -25 6 50.9 5.92
 1 -25 5 -1.08 3.22
 2 -25 4 -2.67 3.47
 3 -25 3 24.61 5.33
 -1 -26 7 41.43 5.68
 0 -26 6 71.96 6.77
 1 -26 5 -1.64 3.42
 2 -26 4 3.75 3.73
 3 -26 3 29.6 5.66
 -1 -27 7 21.1 5.08
 0 -27 6 3.97 3.89
 1 -27 5 78.03 6.87
 2 -27 4 25.85 4.67
 -1 -28 7 90.04 7.9
 0 -28 6 32.15 5.24
 1 -28 5 123.57 9.04
 2 -28 4 37.86 5.03
 0 -29 6 10.62 4.68
 1 -29 5 26.07 4.81
 2 -29 4 -2.43 3.81
 0 -30 6 69.09 7.04
 1 -30 5 20.85 4.41
 2 -30 4 41.1 5.54
 1 -31 5 3.63 3.8
 0 32 5 1.11 4.68
 1 32 4 79.4 7.06
 0 31 5 1.26 4.39
 1 31 4 3.79 4.12
 -1 30 6 67.27 7.23
 0 30 5 34.15 5.47
 1 30 4 115.07 8.21
 2 30 3 11.73 4.27
 -1 29 6 8.73 4.93
 0 29 5 19.06 4.93
 1 29 4 2.34 3.94
 2 29 3 0.12 3.82
 -1 28 6 14.99 5.05
 0 28 5 193.11 11.33
 1 28 4 37.33 4.99
 2 28 3 181.88 10.94
 -1 27 6 -3.51 4.22
 0 27 5 2.39 3.92
 1 27 4 1.77 3.5
 2 27 3 2.94 3.44
 -1 26 6 161.7 10.52
 0 26 5 168.55 10.48
 1 26 4 255.02 12.97
 2 26 3 68.07 6.1
 -2 25 7 6.21 5.25
 -1 25 6 65.5 6.77
 0 25 5 4.16 3.94
 1 25 4 16.69 3.81
 2 25 3 9.04 3.69
 -2 24 7 30.38 5.9
 -1 24 6 235.98 12.85
 0 24 5 155.93 9.5
 1 24 4 304.72 15.24
 2 24 3 112.53 7.21
 -2 23 7 2.99 4.91
 -1 23 6 29.81 5.04
 0 23 5 18.75 4.18
 1 23 4 19.56 3.89
 2 23 3 4.01 3.41
 -2 22 7 90.2 5.33
 -1 22 6 24.94 4.83
 0 22 5 709.76 30.31
 1 22 4 67.05 5.55
 2 22 3 435.24 20.43
 -2 21 7 19.13 3.33
 -1 21 6 45.91 5.57
 0 21 5 116.3 7.6
 1 21 4 14.79 3.37
 2 21 3 0.65 2.75
 3 21 2 47.13 4.79
 -2 20 7 112.28 5.7
 -1 20 6 126.72 8.6
 0 20 5 440.32 19.85
 1 20 4 401.11 17.93
 2 20 3 149.11 8.45
 3 20 2 117.69 7.23
 -2 19 7 19.63 3.25
 -1 19 6 85.33 4.42
 0 19 5 4.38 3.23
 1 19 4 8.13 3.23
 2 19 3 61.52 4.92
 3 19 2 -0.64 2.9
 -2 18 7 2.12 2.81
 -1 18 6 259.49 9.39
 0 18 5 30.76 4.04
 1 18 4 1296.68 50.54
 2 18 3 4.95 2.76
 3 18 2 215.53 10.64
 -2 17 7 4.85 2.66
 -1 17 6 49.25 3.33
 0 17 5 54.21 4.83
 1 17 4 14.75 3.13
 2 17 3 95.08 5.77
 3 17 2 41.06 4.18
 -3 16 8 4.08 4.83
 -2 16 7 138.63 6.34
 -1 16 6 176.34 6.62
 0 16 5 438.3 19.98
 1 16 4 285.37 13.18
 2 16 3 369.65 16.28
 3 16 2 47.47 4.37
 -3 15 8 8.32 4.72
 -2 15 7 48.06 3.69
 -1 15 6 -1.75 1.94
 0 15 5 172.29 6.16
 1 15 4 5.81 2.73
 2 15 3 61.11 4.57
 3 15 2 54.42 4.43
 -3 14 8 12.1 4.79
 -2 14 7 54.49 3.87
 -1 14 6 54.91 3.23
 0 14 5 455.94 14.8
 1 14 4 525.36 22.89
 2 14 3 336.32 14.57
 3 14 2 22.27 3.15
 -3 13 8 6.85 4.39
 -2 13 7 22.28 2.91
 -1 13 6 3.73 2.05
 0 13 5 3.49 1.6
 1 13 4 0.68 2.31
 2 13 3 49.46 3.95
 3 13 2 5.21 2.56
 -3 12 8 72.26 7.09
 -2 12 7 6.39 2.52
 -1 12 6 351.7 11.39
 0 12 5 99.68 3.95
 1 12 4 704.28 30.18
 2 12 3 62.57 4.26
 3 12 2 389.71 17.18
 4 12 1 42.25 4.23
 -3 11 8 16.6 4.56
 -2 11 7 7.27 2.44
 -1 11 6 186.44 6.79
 0 11 5 71.9 3.16
 1 11 4 -2.31 2.05
 2 11 3 0.97 2.18
 3 11 2 113.12 6.51
 4 11 1 1.65 3.08
 -3 10 8 1.76 4.13
 -2 10 7 176.76 6.85
 -1 10 6 32.54 2.48
 0 10 5 375.65 11.55
 1 10 4 5.65 2.11
 2 10 3 512.38 21.14
 3 10 2 38.84 3.76
 4 10 1 57.11 4.88
 -3 9 8 -1.19 4.01
 -2 9 7 6.69 2.35
 -1 9 6 80.31 3.63
 0 9 5 31.07 2.07
 1 9 4 6.28 1.12
 2 9 3 89.02 5.27
 3 9 2 14.62 2.65
 4 9 1 3.98 2.95
 -3 8 8 92.43 7.39
 -2 8 7 84.8 4.25
 -1 8 6 207.25 7.2
 0 8 5 795.02 23.8
 1 8 4 14.54 1.29
 2 8 3 815.39 33.79
 3 8 2 230.33 10.86
 4 8 1 70.1 5.28
 -3 7 8 28.15 4.9
 -2 7 7 32.91 2.85
 -1 7 6 73.12 3.41
 0 7 5 2.53 1.3
 1 7 4 134.88 4.76
 2 7 3 26.73 1.66
 3 7 2 45.71 3.93
 4 7 1 2.32 2.89
 -3 6 8 190.11 10.75
 -2 6 7 46.87 3.05
 -1 6 6 617.56 19.01
 0 6 5 173.69 6.12
 1 6 4 78.54 3.16
 2 6 3 163.06 5.44
 3 6 2 443.78 19.2
 4 6 1 4.99 2.94
 -3 5 8 22.21 4.61
 -2 5 7 12.11 3.44
 0 5 5 315.72 10.23
 1 5 4 7.63 1.16
 2 5 3 280.58 9.13
 3 5 2 3.32 2.24
 4 5 1 53.57 4.56
 -3 4 8 4.7 3.79
 -2 4 7 444.79 20.51
 -1 4 6 111.51 4.24
 0 4 5 881.06 26.45
 1 4 4 839.3 25.23
 2 4 3 1350.48 38.64
 3 4 2 90.15 5.53
 4 4 1 261.62 12.61
 -3 3 8 -2.4 3.65
 -2 3 7 47.53 4.8
 -1 3 6 39.39 2.37
 0 3 5 9.77 1.44
 1 3 4 45.09 2.16
 2 3 3 92.02 3.65
 3 3 2 54.42 4.02
 -3 2 8 101.58 7.59
 -2 2 7 621.77 26.85
 -1 2 6 579.47 17.16
 0 2 5 258.1 8.45
 1 2 4 147.25 5.31
 2 2 3 116.82 4.24
 3 2 2 188.44 8.92
 4 2 1 337.36 15.79
 -3 1 8 22.47 4.45
 -2 1 7 64.24 5.02
 -1 1 6 124.87 4.59
 0 1 5 99.6 3.75
 1 1 4 61.92 2.63
 2 1 3 20.51 1.64
 3 1 2 191.67 8.84
 4 1 1 14.28 3.42
 -3 0 8 160.97 9.84
 -2 0 7 1.86 2.91
 -1 0 6 1157.22 33.9
 0 0 5 -1.68 1.07
 1 0 4 2545.32 74.5
 2 0 3 0.03 1.16
 3 0 2 1102.95 32.67
 4 0 1 2.53 2.97
 -3 -1 8 28.58 4.71
 -2 -1 7 45.27 4.72
 -1 -1 6 133.68 4.57
 0 -1 5 99.7 3.71
 1 -1 4 63.38 2.7
 2 -1 3 22.35 1.7
 3 -1 2 166.49 6.25
 -3 -2 8 96.43 7.42
 -2 -2 7 598.2 26.85
 -1 -2 6 590.09 17.06
 0 -2 5 268.79 8.45
 1 -2 4 161.64 5.42
 2 -2 3 114.64 4.35
 3 -2 2 170.74 6.34
 4 -2 1 346.12 15.96
 -3 -3 8 4.87 3.89
 -2 -3 7 50.94 4.87
 -1 -3 6 38.16 2.11
 0 -3 5 12.56 1.27
 1 -3 4 42.92 2.18
 2 -3 3 101.25 3.91
 3 -3 2 51.96 2.96
 4 -3 1 19.8 3.87
 -3 -4 8 -0.51 3.39
 -2 -4 7 434.53 20.54
 -1 -4 6 102.59 6.37
 0 -4 5 925.36 26.41
 1 -4 4 881.72 25.41
 2 -4 3 1326.89 38.89
 3 -4 2 89.31 4.03
 4 -4 1 271.11 12.96
 -3 -5 8 19.61 4.33
 -2 -5 7 25.94 3.79
 -1 -5 6 2.9 2.57
 0 -5 5 333.08 10.2
 1 -5 4 4.43 1.26
 2 -5 3 305.34 9.55
 3 -5 2 8.71 2.67
 4 -5 1 40.73 4.52
 -3 -6 8 172.57 10.54
 -2 -6 7 37.77 4.35
 -1 -6 6 621.85 28.02
 0 -6 5 195.9 6.07
 1 -6 4 81.62 3.33
 2 -6 3 161.3 5.84
 3 -6 2 445.82 14.12
 4 -6 1 5.76 3.26
 -3 -7 8 33.35 4.95
 -2 -7 7 33.7 4.14
 -1 -7 6 75.9 5.26
 0 -7 5 2.1 1.08
 1 -7 4 145.34 5
 2 -7 3 28.88 2.16
 3 -7 2 48.72 3.04
 4 -7 1 4.95 3.26
 -3 -8 8 86.99 7.12
 -2 -8 7 79.89 6.06
 -1 -8 6 203.55 10.68
 0 -8 5 847.38 23.72
 1 -8 4 14.42 1.54
 2 -8 3 799.27 24.68
 3 -8 2 224.9 8.07
 -3 -9 8 -1.21 3.78
 -2 -9 7 6.78 3.15
 -1 -9 6 79.03 5.57
 0 -9 5 29.81 1.75
 1 -9 4 7.58 0.82
 2 -9 3 88.47 3.94
 3 -9 2 16.87 2.29
 -3 -10 8 -2.9 3.84
 -2 -10 7 166.68 9.85
 -1 -10 6 33.75 3.76
 0 -10 5 368.36 11.36
 1 -10 4 3.05 0.82
 2 -10 3 486.97 15.46
 3 -10 2 42.45 3.05
 -3 -11 8 16.26 4.34
 -2 -11 7 10.28 3.43
 -1 -11 6 190.21 10.13
 0 -11 5 67.31 2.86
 1 -11 4 -0.54 0.88
 2 -11 3 3.53 1.62
 3 -11 2 126.54 5.23
 -3 -12 8 97.78 7.46
 -2 -12 7 8.42 3.35
 -1 -12 6 365.19 16.82
 0 -12 5 91.79 3.66
 1 -12 4 723.23 21.89
 2 -12 3 57.07 3.13
 3 -12 2 368.81 18.75
 -3 -13 8 12.2 4.42
 -2 -13 7 12.49 3.69
 -1 -13 6 6.42 3.02
 0 -13 5 8.43 2.95
 1 -13 4 -0.13 1.4
 2 -13 3 52.95 3.01
 3 -13 2 3.21 3.3
 -3 -14 8 25.45 4.68
 -2 -14 7 59.02 5.25
 -1 -14 6 54.81 4.84
 0 -14 5 500.06 15.29
 1 -14 4 534.29 24.68
 2 -14 3 318.7 15.91
 3 -14 2 29.91 4.39
 4 -14 1 90.81 7.65
 -3 -15 8 3.89 4.1
 -2 -15 7 47.75 5.25
 -1 -15 6 -0.97 2.68
 0 -15 5 171.49 6.26
 1 -15 4 9.27 2.95
 2 -15 3 59.69 5.27
 3 -15 2 53.24 5.46
 4 -15 1 27.4 5.11
 -3 -16 8 10.53 4.45
 -2 -16 7 144.38 9.01
 -1 -16 6 154.59 9.54
 0 -16 5 477.91 14.51
 1 -16 4 283.99 14.22
 2 -16 3 347.87 17.8
 3 -16 2 56.79 5.72
 4 -16 1 199.39 12.41
 -2 -17 7 7.3 3.64
 -1 -17 6 48.55 4.88
 0 -17 5 58.12 3.12
 1 -17 4 10.06 3.25
 2 -17 3 78.85 6.3
 3 -17 2 45.51 5.45
 4 -17 1 7.52 4.88
 -2 -18 7 -0.03 3.31
 -1 -18 6 272.72 9.45
 0 -18 5 31.44 2.45
 1 -18 4 1201.38 53.66
 2 -18 3 3.05 2.98
 3 -18 2 206.98 12.09
 4 -18 1 9.99 4.82
 -2 -19 7 16.59 4.04
 -1 -19 6 86 4.31
 0 -19 5 2.38 1.87
 1 -19 4 3.89 3.22
 2 -19 3 58.26 5.5
 3 -19 2 3.49 4.14
 -2 -20 7 104.17 5.23
 -1 -20 6 138.96 5.75
 0 -20 5 423.47 14.05
 1 -20 4 374.73 18.99
 2 -20 3 153.79 9.42
 3 -20 2 113.11 8.52
 4 -20 1 118.38 9.69
 -2 -21 7 20.7 3.09
 -1 -21 6 46.81 3.44
 0 -21 5 103.92 4.84
 1 -21 4 11.64 3.5
 2 -21 3 5.41 3.26
 3 -21 2 42.35 5.75
 -2 -22 7 91.81 4.88
 -1 -22 6 35.15 3.16
 0 -22 5 697.12 31.65
 1 -22 4 58.83 5.58
 2 -22 3 451.05 22.09
 3 -22 2 7.51 4.45
 -2 -23 7 7.59 2.61
 -1 -23 6 24.58 3.01
 0 -23 5 21.98 4.21
 1 -23 4 20.43 3.9
 2 -23 3 5.07 3.32
 3 -23 2 3.35 4.29
 -2 -24 7 25.56 3.36
 -1 -24 6 223.67 8.62
 0 -24 5 151.71 9.5
 1 -24 4 297.62 15.99
 2 -24 3 102.59 7.58
 3 -24 2 164.8 10.91
 -2 -25 7 13.96 3.22
 -1 -25 6 64.72 4.2
 0 -25 5 1.85 3.52
 1 -25 4 12.91 3.72
 2 -25 3 12.37 3.74
 3 -25 2 1.75 4.3
 -1 -26 6 157.74 6.9
 0 -26 5 175.75 10.77
 1 -26 4 243.89 13.33
 2 -26 3 74.89 6.72
 3 -26 2 96.63 8.14
 -1 -27 6 -0.35 2.68
 0 -27 5 2.29 3.94
 1 -27 4 2.41 3.26
 2 -27 3 -1.14 3.87
 3 -27 2 9.87 4.91
 -1 -28 6 20.94 5.14
 0 -28 5 186.83 11.47
 1 -28 4 39.13 4.8
 2 -28 3 206.51 12.1
 -1 -29 6 0.74 4.65
 0 -29 5 20.67 4.77
 1 -29 4 0.75 3.34
 2 -29 3 2.09 4.07
 0 -30 5 29.78 5.11
 1 -30 4 99.95 7.92
 2 -30 3 15.33 4.74
 0 -31 5 -1.99 3.92
 1 -31 4 3.38 3.66
 2 -31 3 -1.94 4.13
 0 -32 5 0.63 4.1
 1 -32 4 87.08 7.41
 0 33 4 2.92 4.34
 1 33 3 88.56 7.34
 0 32 4 26.87 5.3
 1 32 3 65.62 6.29
 -1 31 5 -4.68 4.41
 0 31 4 107.24 8.35
 1 31 3 1.13 3.5
 -1 30 5 -0.39 4.54
 0 30 4 35.16 5.53
 1 30 3 45.18 5.16
 -1 29 5 7.15 4.52
 0 29 4 39.81 5.55
 1 29 3 38.34 4.98
 -1 28 5 47.24 5.9
 0 28 4 37.19 5.29
 1 28 3 173.49 10.29
 -2 27 6 2.18 5.28
 -1 27 5 32.91 5.4
 0 27 4 125.47 8.46
 1 27 3 37.05 4.57
 2 27 2 39.93 4.82
 -2 26 6 10.46 5.29
 -1 26 5 64.7 6.68
 0 26 4 15.98 4.29
 1 26 3 16.33 3.72
 2 26 2 12.22 3.89
 -2 25 6 27.22 5.71
 -1 25 5 66.4 6.48
 0 25 4 83.25 6.66
 1 25 3 9.57 3.42
 2 25 2 125.72 7.67
 -2 24 6 30.85 5.69
 -1 24 5 -2.1 3.74
 0 24 4 217.8 11.87
 1 24 3 148.29 9.01
 2 24 2 213.34 11.15
 -2 23 6 18.53 4.88
 -1 23 5 176.04 10.7
 0 23 4 48.21 5.09
 1 23 3 41.15 4.32
 2 23 2 88.37 6.07
 -2 22 6 -5.46 4.21
 -1 22 5 44.63 5.32
 0 22 4 1.23 3.53
 1 22 3 3.51 2.98
 2 22 2 2.49 2.96
 -2 21 6 -1.95 4.19
 -1 21 5 233.41 12.5
 0 21 4 10.76 3.6
 1 21 3 178.29 9.52
 2 21 2 24.55 3.74
 -2 20 6 10.82 4.39
 -1 20 5 104.83 7.86
 0 20 4 549.07 24.3
 1 20 3 94.84 6.22
 2 20 2 427.04 18.19
 -3 19 7 -3.66 3.24
 -2 19 6 114.66 8.36
 -1 19 5 96.53 7.01
 0 19 4 127.66 7.68
 1 19 3 23.78 3.32
 2 19 2 188.76 9.46
 -3 18 7 12.4 3.55
 -2 18 6 37.7 5.24
 -1 18 5 69.52 5.97
 0 18 4 30.98 3.93
 1 18 3 3.23 2.66
 2 18 2 142.83 7.55
 3 18 1 43.91 4.06
 -3 17 7 22.22 3.72
 -2 17 6 151.31 9.3
 -1 17 5 294.48 13.93
 0 17 4 449.38 20.15
 1 17 3 170.14 8.62
 2 17 2 0.03 2.33
 3 17 1 42.5 3.99
 -3 16 7 29.62 3.8
 -2 16 6 15.07 2.72
 -1 16 5 531.82 23.32
 0 16 4 1.16 2.76
 1 16 3 1223.58 51.22
 2 16 2 9.76 2.59
 3 16 1 320.2 14.23
 -3 15 7 55.41 4.42
 -2 15 6 176 7.21
 -1 15 5 108.18 6.98
 0 15 4 50.32 2.51
 1 15 3 477.12 21.18
 2 15 2 150.86 8.01
 3 15 1 230.08 10.82
 -3 14 7 13.67 3.27
 -2 14 6 102.84 4.95
 -1 14 5 2.07 3.12
 0 14 4 105.66 4.05
 1 14 3 801.06 32.27
 2 14 2 70.34 4.59
 3 14 1 56.77 4.24
 -3 13 7 23.48 4.55
 -2 13 6 413.47 13.77
 -1 13 5 198.72 7.2
 0 13 4 1003.47 30.11
 1 13 3 23.74 2.83
 2 13 2 88.09 5.4
 3 13 1 6.22 2.37
 -3 12 7 20.84 4.41
 -2 12 6 311.51 10.66
 -1 12 5 183.63 6.79
 0 12 4 941.25 28.66
 1 12 3 65.26 4.19
 2 12 2 867.63 36.41
 3 12 1 71.27 4.72
 -3 11 7 102.08 7.52
 -2 11 6 20.9 2.6
 -1 11 5 168.29 5.97
 0 11 4 963.8 28.28
 1 11 3 375.48 15.62
 2 11 2 179.32 8.91
 3 11 1 377.99 16.5
 -3 10 7 58.55 5.91
 -2 10 6 2.82 2.07
 -1 10 5 260.25 8.64
 0 10 4 533.07 16.2
 1 10 3 612.22 24.49
 2 10 2 311.16 13.69
 3 10 1 296 13.91
 -3 9 7 238.07 13.04
 -2 9 6 25.35 2.63
 -1 9 5 929.89 27.29
 0 9 4 122.44 4.42
 1 9 3 748.01 31.69
 2 9 2 5.49 2.04
 3 9 1 19.11 2.72
 -3 8 7 154.97 9.57
 -2 8 6 103.81 4.61
 -1 8 5 239.62 7.78
 0 8 4 397.18 12.4
 1 8 3 953.24 40.16
 2 8 2 108.17 5.74
 3 8 1 231.96 10.87
 4 8 0 123.35 7.2
 -3 7 7 2.24 3.67
 -2 7 6 140.51 5.59
 -1 7 5 381.1 11.58
 0 7 4 441.3 13.61
 1 7 3 247.2 7.55
 2 7 2 926.84 38.04
 3 7 1 17.57 2.79
 4 7 0 137.43 7.54
 -3 6 7 4.07 3.7
 -2 6 6 218.21 7.68
 -1 6 5 3.51 1.58
 0 6 4 859.66 25.54
 1 6 3 422.27 12.55
 2 6 2 809.06 32.59
 3 6 1 4.32 2.09
 4 6 0 127.78 7.2
 -3 5 7 94.74 6.83
 -2 5 6 317 10.07
 -1 5 5 77.41 3.31
 0 5 4 752.18 24.37
 1 5 3 53.41 2.19
 2 5 2 245.59 10.97
 3 5 1 12.25 2.42
 4 5 0 57.11 4.73
 -3 4 7 58.4 5.57
 -2 4 6 48.38 2.88
 -1 4 5 276.17 8.65
 0 4 4 321.36 10.01
 1 4 3 55.65 2.34
 2 4 2 137.36 4.82
 3 4 1 399.72 17.23
 4 4 0 83.37 4.17
 -3 3 7 142.32 9.08
 -2 3 6 7.89 1.99
 -1 3 5 203.79 6.73
 0 3 4 114.84 4.04
 1 3 3 746.27 22.53
 2 3 2 32.39 1.83
 3 3 1 252.38 12.24
 4 3 0 4.76 2.26
 -3 2 7 37.35 4.61
 -2 2 6 40.18 4.19
 -1 2 5 593.85 17.18
 0 2 4 139.35 4.54
 1 2 3 462.41 13.95
 2 2 2 12.79 1.25
 3 2 1 230.82 7.82
 4 2 0 67.44 5.09
 -3 1 7 29.32 4.4
 -2 1 6 298.53 14.35
 -1 1 5 130.89 5.08
 0 1 4 19.2 1.33
 1 1 3 111.17 3.93
 2 1 2 157 5.41
 3 1 1 139.95 5.13
 -3 0 7 3.81 3.36
 -2 0 6 182.53 9.83
 -1 0 5 1.63 1.22
 0 0 4 14.31 1.18
 1 0 3 2.86 0.98
 2 0 2 346.93 10.69
 3 0 1 2.51 1.57
 4 0 0 356.91 16.47
 -3 -1 7 29.85 4.35
 -2 -1 6 299.47 14.42
 -1 -1 5 117.22 4.09
 0 -1 4 18.16 1.28
 1 -1 3 117.78 4.02
 2 -1 2 163.67 5.5
 3 -1 1 139.12 5.06
 4 -1 0 20.37 3.78
 -3 -2 7 28.7 4.26
 -2 -2 6 53.18 4.53
 -1 -2 5 600.9 17.05
 0 -2 4 138.41 4.49
 1 -2 3 468.14 14.06
 2 -2 2 14.48 1.4
 3 -2 1 241.68 7.81
 4 -2 0 54.81 5.06
 -3 -3 7 145.69 8.99
 -2 -3 6 6.4 2.75
 -1 -3 5 213.45 6.52
 0 -3 4 123.49 4.01
 1 -3 3 773.4 22.7
 2 -3 2 37.62 2.08
 3 -3 1 285.77 8.87
 4 -3 0 4.32 3.07
 -3 -4 7 50.17 5.2
 -2 -4 6 32.25 3.82
 -1 -4 5 273.66 8.37
 0 -4 4 330.07 9.96
 1 -4 3 59.59 2.52
 2 -4 2 143.56 4.01
 3 -4 1 392.16 12.6
 4 -4 0 89.82 6.14
 -3 -5 7 89.73 6.74
 -2 -5 6 290.88 14.57
 -1 -5 5 78.77 2.85
 0 -5 4 869.38 24.38
 1 -5 3 53.57 2.37
 2 -5 2 251.5 6.47
 3 -5 1 11.35 1.88
 -3 -6 7 3.81 3.47
 -2 -6 6 220.3 11.18
 -1 -6 5 0.67 2.05
 0 -6 4 887.94 25.45
 1 -6 3 410.04 12.79
 2 -6 2 812.06 19.41
 3 -6 1 6.31 1.82
 -3 -7 7 2.24 3.5
 -2 -7 6 146.2 8.16
 -1 -7 5 379.42 17.06
 0 -7 4 457.33 13.53
 1 -7 3 245.76 7.85
 2 -7 2 933.69 22.68
 3 -7 1 29.76 2.41
 -3 -8 7 148.93 9.34
 -2 -8 6 101.52 6.56
 -1 -8 5 223.38 11.32
 0 -8 4 419.42 12.32
 1 -8 3 1010.26 29.32
 2 -8 2 112.36 3.25
 3 -8 1 240.56 8.25
 -3 -9 7 243.36 13.04
 -2 -9 6 26.2 3.67
 -1 -9 5 925.56 39.85
 0 -9 4 127.64 4.29
 1 -9 3 759.25 23.1
 2 -9 2 7.15 1.79
 3 -9 1 28.07 2.56
 -3 -10 7 71.02 6.15
 -2 -10 6 7.28 2.99
 -1 -10 5 261.06 12.64
 0 -10 4 543.46 16.08
 1 -10 3 589.18 14.45
 2 -10 2 308.06 10.14
 3 -10 1 324.5 15.49
 -3 -11 7 102.29 7.57
 -2 -11 6 17.88 3.5
 -1 -11 5 158.18 8.67
 0 -11 4 959.83 41.66
 1 -11 3 365.39 9.14
 2 -11 2 196.14 6.75
 3 -11 1 385.53 18.19
 -3 -12 7 21.3 4.23
 -2 -12 6 295.39 15.08
 -1 -12 5 195.35 10.03
 0 -12 4 1033.1 29.53
 1 -12 3 65.44 2.24
 2 -12 2 881.44 39.22
 3 -12 1 67.38 5.62
 -3 -13 7 11.79 4.02
 -2 -13 6 420.02 19.79
 -1 -13 5 195.01 10.42
 0 -13 4 1050.85 30.96
 1 -13 3 25.43 1.71
 2 -13 2 96.58 6.32
 3 -13 1 5.09 3.34
 -3 -14 7 6.6 3.91
 -2 -14 6 103.76 6.87
 -1 -14 5 3.57 2.85
 0 -14 4 110.77 4.21
 1 -14 3 763.94 23.85
 3 -14 1 58.76 5.22
 -3 -15 7 54.08 5.75
 -2 -15 6 181.43 10.05
 -1 -15 5 102.21 6.58
 0 -15 4 46.73 2.63
 1 -15 3 495.92 15.61
 2 -15 2 159.92 9.12
 3 -15 1 223.03 12.27
 -3 -16 7 26.72 4.68
 -2 -16 6 18.32 3.66
 -1 -16 5 539.44 16.69
 0 -16 4 1.03 1.48
 1 -16 3 1235.94 38.08
 2 -16 2 11.36 3.05
 3 -16 1 307.46 15.92
 -3 -17 7 22.02 4.38
 -2 -17 6 130 8.39
 -1 -17 5 275.29 9.49
 0 -17 4 459.16 14.5
 1 -17 3 162.69 6.04
 2 -17 2 0.6 2.71
 3 -17 1 34.69 4.72
 -3 -18 7 9.92 4.19
 -2 -18 6 28.78 4.08
 -1 -18 5 64.43 3.58
 0 -18 4 33.09 2.43
 1 -18 3 4.4 2.82
 2 -18 2 151.93 8.78
 3 -18 1 39.92 4.92
 -3 -19 7 2.49 2.59
 -2 -19 6 114.5 5.37
 -1 -19 5 96.71 4.44
 0 -19 4 123.62 5.1
 1 -19 3 29.26 3.84
 2 -19 2 177.78 10.51
 3 -19 1 34.89 4.83
 -2 -20 6 6.19 3.36
 -1 -20 5 125.53 5.29
 0 -20 4 566.79 17.61
 1 -20 3 94.31 6.62
 2 -20 2 398.64 19.81
 3 -20 1 40.79 5.29
 -2 -21 6 -0.03 2.21
 -1 -21 5 238.72 8.6
 0 -21 4 10.71 2.15
 1 -21 3 186.33 10.11
 2 -21 2 33.13 4.52
 3 -21 1 11.19 4.25
 -2 -22 6 0.29 2.27
 -1 -22 5 47.18 3.47
 0 -22 4 0.46 2.01
 1 -22 3 5.49 2.97
 2 -22 2 8.34 3.48
 3 -22 1 87.23 7.29
 -2 -23 6 14.88 2.74
 -1 -23 5 187.76 7.28
 0 -23 4 45.76 3.21
 1 -23 3 36.32 4.2
 2 -23 2 88.5 6.96
 3 -23 1 1.43 4.05
 -2 -24 6 21.51 3.21
 -1 -24 5 -1.47 2.27
 0 -24 4 220.47 8.23
 1 -24 3 171.24 9.61
 2 -24 2 211.8 12.24
 3 -24 1 1.13 4.09
 -2 -25 6 22.18 4.44
 -1 -25 5 68.56 4.14
 0 -25 4 70.56 4.19
 1 -25 3 9.62 3.19
 2 -25 2 113.77 8.38
 3 -25 1 1.06 4.26
 -2 -26 6 8.54 4.16
 -1 -26 5 73.95 4.35
 0 -26 4 12.79 3.97
 1 -26 3 13.11 3.4
 2 -26 2 14.08 4.11
 3 -26 1 52.18 6.45
 -2 -27 6 1.36 4.06
 -1 -27 5 38.81 3.58
 0 -27 4 108.66 7.98
 1 -27 3 33.18 4.55
 2 -27 2 46.02 5.49
 3 -27 1 21.12 5.28
 -1 -28 5 47.23 3.93
 0 -28 4 34.21 4.89
 1 -28 3 183.28 10.63
 2 -28 2 7.17 4.05
 3 -28 1 57.07 7
 -1 -29 5 5.25 4.3
 0 -29 4 41.67 5.23
 1 -29 3 41.79 5.09
 2 -29 2 94.35 7.65
 -1 -30 5 0.6 4.17
 0 -30 4 33.36 4.94
 1 -30 3 44.16 5.05
 2 -30 2 39.99 5.41
 -1 -31 5 -4.58 3.94
 0 -31 4 108.46 7.96
 1 -31 3 -1.89 3.66
 2 -31 2 9.82 4.51
 1 -32 3 71.1 6.39
 1 -33 3 83.64 7.15
 0 34 3 5.48 4.54
 0 33 3 69.05 6.99
 1 33 2 28.99 4.97
 -1 32 4 43.25 5.87
 0 32 3 9.23 4.75
 1 32 2 18.35 4.26
 -1 31 4 42.48 5.98
 0 31 3 -0.61 4.05
 1 31 2 184.75 10.56
 -1 30 4 22.27 5.08
 0 30 3 26.38 4.94
 1 30 2 37.48 4.86
 -2 29 5 184.07 11.56
 -1 29 4 52.42 6.18
 0 29 3 197.17 11.17
 1 29 2 11.67 3.82
 -2 28 5 9.44 4.98
 -1 28 4 20.15 4.92
 0 28 3 8.14 3.95
 1 28 2 25.06 4.24
 -2 27 5 37.21 6.03
 -1 27 4 47.24 5.66
 0 27 3 249.54 12.29
 1 27 2 129.09 8.24
 -2 26 5 8.54 4.83
 -1 26 4 11.19 4.47
 0 26 3 89.05 6.69
 1 26 2 26.58 4.18
 -2 25 5 -2.51 4.45
 -1 25 4 386.88 18.26
 0 25 3 2.06 3.25
 1 25 2 444.65 20.38
 -2 24 5 8.87 4.64
 -1 24 4 12.97 4.14
 0 24 3 46.44 4.79
 1 24 2 5.8 2.86
 2 24 1 19.64 3.57
 -2 23 5 66.9 6.76
 -1 23 4 148.02 9.37
 0 23 3 448.16 20.33
 1 23 2 147.71 8.42
 2 23 1 333.15 15.01
 -3 22 6 4.4 4.9
 -2 22 5 0.75 4.1
 -1 22 4 8.77 3.89
 0 22 3 23.56 3.9
 1 22 2 21.32 3.44
 2 22 1 174.59 9.09
 -3 21 6 25.25 5.59
 -2 21 5 156.03 10.12
 -1 21 4 115.66 7.99
 0 21 3 919.6 37.08
 1 21 2 0.52 2.65
 2 21 1 494.08 20.24
 -3 20 6 12.31 5.04
 -2 20 5 10.67 4.28
 -1 20 4 9.51 3.88
 0 20 3 12.33 3.26
 1 20 2 41.95 4.05
 2 20 1 39.49 3.88
 -3 19 6 160.94 10.48
 -2 19 5 68.58 6.39
 -1 19 4 407.86 19.38
 0 19 3 78.03 5.64
 1 19 2 1069.88 41.72
 2 19 1 0.58 2.26
 -3 18 6 2.29 4.46
 -2 18 5 3.43 3.74
 -1 18 4 18.06 3.83
 0 18 3 28.41 3.52
 1 18 2 263.5 12.06
 2 18 1 11.08 2.52
 -3 17 6 67.02 6.83
 -2 17 5 98.72 7.27
 -1 17 4 248.43 13.06
 0 17 3 413.89 19.5
 1 17 2 934.27 37.49
 2 17 1 45.31 3.6
 -3 16 6 6.45 4.47
 -2 16 5 17.68 4.08
 -1 16 4 7.99 3.37
 0 16 3 18.04 2.97
 1 16 2 58.07 4.14
 2 16 1 131.65 6.82
 -3 15 6 11.66 4.56
 -2 15 5 387.26 18.17
 -1 15 4 4.19 2.95
 0 15 3 1351.99 56.08
 1 15 2 16.99 2.53
 2 15 1 195.05 9.44
 -3 14 6 0 2.67
 -2 14 5 35.88 4.59
 -1 14 4 6.83 3.05
 0 14 3 4.51 2.35
 1 14 2 305.36 13.17
 2 14 1 78.6 4.67
 3 14 0 1.73 2.3
 -3 13 6 119.47 5.87
 -2 13 5 70.04 5.96
 -1 13 4 234.23 12.11
 0 13 3 222.15 10.5
 1 13 2 767.46 32.81
 2 13 1 242.63 10.74
 3 13 0 222.15 10.22
 -3 12 6 5.89 2.67
 -2 12 5 15.56 3.71
 -1 12 4 32.62 3.78
 0 12 3 82.86 5.03
 1 12 2 176.82 8.15
 2 12 1 87.78 4.9
 3 12 0 45.15 3.59
 -3 11 6 58 4.07
 -2 11 5 295.3 14.61
 -1 11 4 927.98 40.11
 0 11 3 351.75 16.03
 1 11 2 439.54 18.16
 2 11 1 75.94 4.32
 3 11 0 52.32 3.78
 -3 10 6 4.47 2.58
 -2 10 5 7.15 3.28
 -1 10 4 50.95 4.32
 0 10 3 83.25 4.93
 1 10 2 50.55 3.34
 2 10 1 71.67 4.43
 3 10 0 46.63 3.64
 -3 9 6 3.7 2.54
 -2 9 5 278.21 9.56
 -1 9 4 17.46 2.93
 0 9 3 362.42 11.06
 1 9 2 7.84 1.72
 2 9 1 987.23 39.25
 3 9 0 78.38 4.81
 -3 8 6 5.24 3.58
 -2 8 5 7.87 1.99
 -1 8 4 89.78 5.37
 0 8 3 712.33 21.09
 1 8 2 107.21 5.27
 2 8 1 186.27 8.31
 3 8 0 2.98 2.04
 4 8 -1 5.38 3.53
 -3 7 6 223.32 11.8
 -2 7 5 33.48 2.61
 -1 7 4 1721.53 50.23
 0 7 3 198.55 6.32
 1 7 2 477.2 19.65
 2 7 1 107.73 5.5
 3 7 0 275.3 8.89
 4 7 -1 11.15 3.6
 -4 6 7 8.95 4.62
 -3 6 6 14.96 3.8
 -2 6 5 1.3 1.72
 -1 6 4 38.72 3.32
 0 6 3 407.39 12.61
 1 6 2 141.78 6.75
 2 6 1 5.12 1.67
 3 6 0 125.2 4.75
 4 6 -1 9.01 3.35
 -4 5 7 37.67 5.58
 -3 5 6 237.2 12.81
 -2 5 5 67.69 3.41
 -1 5 4 651.79 19.21
 0 5 3 8.04 0.95
 1 5 2 479.77 14.13
 2 5 1 1045.38 41.15
 3 5 0 317.83 10.01
 4 5 -1 223.21 7.99
 -4 4 7 -0.15 4.24
 -3 4 6 34.41 4.43
 -2 4 5 25.36 2.23
 -1 4 4 63.77 2.74
 0 4 3 537.53 16.28
 1 4 2 761.3 21.62
 2 4 1 3.69 1.67
 3 4 0 14.48 1.8
 4 4 -1 29.92 2.88
 -4 3 7 88.1 7.43
 -3 3 6 15.53 3.67
 -2 3 5 807.2 24.73
 -1 3 4 520.78 15.34
 0 3 3 1388.72 41.69
 1 3 2 28.36 1.41
 2 3 1 1333.99 50.87
 3 3 0 15.46 1.81
 4 3 -1 213.94 7.61
 -4 2 7 2.04 4.16
 -3 2 6 10.32 3.65
 -2 2 5 147.37 5.22
 -1 2 4 160.45 5.21
 0 2 3 163.6 5.1
 1 2 2 72.51 2.72
 2 2 1 49.41 2.27
 4 2 -1 113.84 5.08
 -4 1 7 27.39 5.03
 -3 1 6 225.49 12.12
 -2 1 5 555.25 17.23
 -1 1 4 315.71 9.69
 0 1 3 879.18 25.85
 1 1 2 1214.22 34.97
 2 1 1 20.46 1.18
 3 1 0 1042.53 31.64
 4 1 -1 17.56 2.48
 -4 0 7 6.55 4.31
 -3 0 6 19.89 3.77
 -2 0 5 10.57 2.7
 -1 0 4 410.71 12.29
 0 0 3 -2.07 0.7
 1 0 2 304.25 11.3
 2 0 1 0.39 0.76
 3 0 0 59.1 4.33
 4 0 -1 -3.11 2.05
 -4 -1 7 21.58 4.66
 -3 -1 6 234.86 12.21
 -2 -1 5 558.2 17.12
 -1 -1 4 319.66 9.62
 0 -1 3 863.86 25.82
 1 -1 2 1183.71 40.06
 2 -1 1 21.47 1.2
 3 -1 0 1119.97 31.71
 4 -1 -1 25.59 3.6
 -4 -2 7 -3.99 4.08
 -3 -2 6 20.96 3.72
 -2 -2 5 120.41 7.39
 -1 -2 4 153.14 5.01
 0 -2 3 159.11 5.06
 1 -2 2 78.63 2.88
 2 -2 1 52.16 1.87
 3 -2 0 8.5 1.68
 -4 -3 7 91.13 7.3
 -3 -3 6 16.73 3.53
 -2 -3 5 813.24 36.04
 -1 -3 4 527.29 15.1
 0 -3 3 1431.22 41.66
 1 -3 2 30.51 1.61
 2 -3 1 1301.64 30.36
 3 -3 0 14.47 1.79
 -4 -4 7 3.88 4.03
 -3 -4 6 28.05 3.98
 -2 -4 5 34.73 3.49
 -1 -4 4 63.97 2.33
 0 -4 3 585.3 16.25
 1 -4 2 720.86 21.82
 2 -4 1 0.48 1.1
 3 -4 0 22.55 1.99
 -4 -5 7 42.07 5.58
 -3 -5 6 250.98 12.86
 -2 -5 5 73.53 4.99
 -1 -5 4 631.68 27.94
 0 -5 3 6.25 0.77
 1 -5 2 493.14 14.44
 2 -5 1 1040.5 26.18
 3 -5 0 317.29 9.96
 -4 -6 7 6.67 4.33
 -3 -6 6 17.83 3.79
 -2 -6 5 2.05 2.37
 -1 -6 4 27.4 2.85
 0 -6 3 448.9 13.7
 1 -6 2 151.1 5.01
 2 -6 1 4.39 0.95
 3 -6 0 125.36 4.71
 -3 -7 6 206.86 11.56
 -2 -7 5 31.9 3.45
 -1 -7 4 1618.44 73.03
 0 -7 3 206.14 6.24
 1 -7 2 456.64 14.36
 2 -7 1 111.31 3.27
 3 -7 0 265.5 12.35
 -3 -8 6 15 3.58
 -2 -8 5 3.74 2.63
 -1 -8 4 81.34 5.2
 0 -8 3 717.14 21
 1 -8 2 110.65 3
 2 -8 1 180.13 4.91
 3 -8 0 3.83 2.1
 -3 -9 6 2.03 3.11
 -2 -9 5 271.01 13.56
 -1 -9 4 16.39 2.56
 0 -9 3 364.98 16.5
 1 -9 2 9.69 0.86
 2 -9 1 984.17 23.64
 3 -9 0 74.07 5.61
 -3 -10 6 7.1 3.5
 -2 -10 5 5.64 2.73
 -1 -10 4 58.94 4.17
 0 -10 3 91.39 3.38
 1 -10 2 52.81 2.06
 2 -10 1 83.21 3.16
 3 -10 0 45.07 4.37
 -3 -11 6 60.24 5.38
 -2 -11 5 303.19 14.62
 -1 -11 4 983.66 41.94
 0 -11 3 382.9 11.7
 1 -11 2 431.32 13.43
 2 -11 1 73.14 3.03
 3 -11 0 56.17 4.88
 -3 -12 6 4.29 3.63
 -2 -12 5 23.55 3.54
 -1 -12 4 38.36 3.54
 0 -12 3 85.9 3.41
 1 -12 2 168.67 5.87
 2 -12 1 85.36 3.47
 3 -12 0 55.86 4.89
 -3 -13 6 114.44 7.71
 -2 -13 5 67.46 5.19
 -1 -13 4 256.91 12.16
 0 -13 3 230.04 7.45
 1 -13 2 790.14 24.44
 2 -13 1 245.51 7.99
 3 -13 0 209.39 11.59
 -3 -14 6 0.41 3.43
 -2 -14 5 33.97 3.92
 -1 -14 4 4.05 2.5
 0 -14 3 0.13 1.26
 1 -14 2 293.44 9.64
 2 -14 1 77.1 3.37
 3 -14 0 1.43 3.12
 -3 -15 6 7.06 3.67
 -2 -15 5 365.03 17.93
 -1 -15 4 1.07 1.51
 0 -15 3 1405.51 41.53
 1 -15 2 15.82 1.62
 2 -15 1 195.3 10.65
 3 -15 0 40.47 4.57
 -3 -16 6 0.04 3.51
 -2 -16 5 21.16 3.66
 -1 -16 4 10.27 1.79
 0 -16 3 9.35 1.66
 1 -16 2 57.83 2.86
 2 -16 1 121.05 7.71
 3 -16 0 16.77 3.76
 -3 -17 6 71.85 6.09
 -2 -17 5 94.56 4.48
 -1 -17 4 271.96 9.12
 0 -17 3 438.48 14.2
 1 -17 2 889.17 27.81
 2 -17 1 41.42 4.33
 3 -17 0 273.55 14.56
 -3 -18 6 1.13 2.41
 -2 -18 5 2.44 1.97
 -1 -18 4 14.54 2.04
 0 -18 3 23.54 2.17
 1 -18 2 256.2 8.75
 2 -18 1 14.83 3.27
 3 -18 0 51.97 5.44
 -3 -19 6 142.7 9.18
 -2 -19 5 75.13 3.95
 -1 -19 4 441.29 13.85
 0 -19 3 81.15 3.8
 1 -19 2 1011.18 30.94
 2 -19 1 2.9 3.1
 3 -19 0 112.46 7.92
 -3 -20 6 10.94 3.86
 -2 -20 5 3.62 2.13
 -1 -20 4 5.34 2.14
 0 -20 3 5.55 1.88
 1 -20 2 43.75 2.61
 2 -20 1 39.76 4.53
 3 -20 0 32.28 4.8
 -3 -21 6 9.36 3.67
 -2 -21 5 166.16 6.74
 -1 -21 4 126.34 5.36
 0 -21 3 885.39 27.19
 1 -21 2 1.17 1.7
 2 -21 1 453.48 22.04
 3 -21 0 6.95 4.09
 -3 -22 6 -0.99 3.46
 -2 -22 5 2.93 2.28
 -1 -22 4 14.03 2.37
 0 -22 3 21.09 2.5
 1 -22 2 17.66 2.16
 2 -22 1 175.86 10.24
 3 -22 0 6 4.2
 -2 -23 5 70.45 4.21
 -1 -23 4 154.43 6.31
 0 -23 3 451.5 14.68
 1 -23 2 161.79 9.05
 2 -23 1 346.12 16.68
 3 -23 0 36.68 5.38
 -2 -24 5 -0.48 3.69
 -1 -24 4 8.29 2.36
 0 -24 3 43.48 3.11
 1 -24 2 7.7 3.21
 2 -24 1 20.9 4.08
 3 -24 0 35.34 5.67
 -2 -25 5 2.37 3.59
 -1 -25 4 381.19 12.95
 0 -25 3 -0.47 1.96
 1 -25 2 455.34 21.56
 2 -25 1 44.13 5.24
 3 -25 0 98.8 8.15
 -2 -26 5 10.14 4.05
 -1 -26 4 1.47 2.61
 0 -26 3 86.46 4.43
 1 -26 2 30.91 4.19
 2 -26 1 15.66 4.1
 3 -26 0 21.87 5.2
 -2 -27 5 41.43 5.34
 -1 -27 4 43.72 5.2
 0 -27 3 213.48 8.38
 1 -27 2 140.57 8.73
 2 -27 1 230.18 12.29
 3 -27 0 81.34 7.8
 -2 -28 5 6.57 4.72
 -1 -28 4 17.57 4.2
 0 -28 3 5.21 2.29
 1 -28 2 27.85 4.18
 2 -28 1 22.25 4.78
 -2 -29 5 176.3 11.17
 -1 -29 4 65.23 6
 0 -29 3 185.5 7.52
 2 -29 1 72.82 6.82
 -1 -30 4 17.75 4.49
 1 -30 2 41.12 4.92
 2 -30 1 4.77 4.46
 -1 -31 4 52.62 5.72
 1 -31 2 192.51 11.01
 2 -31 1 9.07 4.87
 -1 -32 4 38.94 5.45
 1 -32 2 16.72 4.12
 2 -32 1 20.02 5.07
 0 35 2 45.69 6.11
 0 34 2 -2.48 4.05
 -1 33 3 27.99 5.36
 0 33 2 15.13 4.58
 1 33 1 116.2 7.75
 -1 32 3 4.79 4.3
 0 32 2 65.01 5.96
 1 32 1 -3.55 3.3
 2 32 0 30.39 5.1
 -1 31 3 5.14 4.27
 0 31 2 168.12 9.85
 1 31 1 -2.59 3.19
 2 31 0 61.95 6.15
 -2 30 4 3.88 4.84
 -1 30 3 6.8 4.06
 0 30 2 84.14 6.46
 1 30 1 4.2 2.55
 2 30 0 14.48 4.27
 -2 29 4 43.43 6.33
 -1 29 3 6.95 4.17
 0 29 2 41.26 4.92
 1 29 1 157.32 6.33
 2 29 0 54.6 5.67
 -2 28 4 27.8 5.43
 -1 28 3 23.29 4.75
 0 28 2 22.84 4.17
 1 28 1 45.07 3.25
 2 28 0 -1.31 3.47
 -2 27 4 66.3 6.88
 -1 27 3 132.32 8.67
 0 27 2 73.75 5.98
 1 27 1 163.85 6.38
 2 27 0 3.5 3.62
 -2 26 4 7.17 4.48
 -1 26 3 25.09 4.47
 0 26 2 82.32 6.18
 1 26 1 109.97 4.86
 2 26 0 14.62 3.84
 -2 25 4 99.72 7.92
 -1 25 3 86.29 6.87
 0 25 2 150.06 8.7
 1 25 1 1.9 1.97
 2 25 0 352.09 16.94
 -3 24 5 0.65 4.83
 -2 24 4 39 5.52
 -1 24 3 -0.79 3.56
 0 24 2 8.79 1.96
 1 24 1 2.79 1.96
 2 24 0 14.73 3.79
 -3 23 5 90.66 8.26
 -2 23 4 33.39 5.12
 -1 23 3 342.45 16.78
 0 23 2 50.75 2.88
 1 23 1 133.71 5.41
 2 23 0 161.35 8.96
 -3 22 5 22.37 5.67
 -2 22 4 11.85 4.26
 -1 22 3 92.38 6.85
 0 22 2 2.03 1.66
 1 22 1 233.99 8.03
 2 22 0 32.69 4.25
 -3 21 5 94.69 8.12
 -2 21 4 -1 3.69
 -1 21 3 384 18.02
 0 21 2 10.38 1.77
 1 21 1 334.03 10.74
 2 21 0 81.85 5.76
 -3 20 5 20.69 5.37
 -2 20 4 42.45 5.41
 -1 20 3 3.71 3.09
 0 20 2 50.74 2.67
 1 20 1 7.66 1.76
 2 20 0 8.97 1.99
 -3 19 5 -3.32 4.1
 -2 19 4 275.84 14.72
 -1 19 3 9.32 3.44
 0 19 2 392.92 12.28
 1 19 1 24.34 2.09
 2 19 0 404.24 12.36
 -3 18 5 4.32 4.59
 -2 18 4 75.26 6.42
 -1 18 3 25.8 3.99
 0 18 2 313.89 9.53
 1 18 1 21.55 1.97
 2 18 0 52.66 2.88
 -3 17 5 22.46 5.07
 -2 17 4 363.42 17.88
 -1 17 3 409.82 18.09
 0 17 2 363.74 10.99
 1 17 1 132.66 4.82
 2 17 0 86.57 3.69
 -3 16 5 70.92 6.96
 -2 16 4 12.5 3.74
 -1 16 3 -0.75 2.62
 0 16 2 28.68 1.86
 1 16 1 7.22 1.5
 2 16 0 11.51 1.66
 -3 15 5 119.48 8.7
 -2 15 4 79.04 6.49
 -1 15 3 201.97 10.22
 0 15 2 96.46 3.63
 1 15 1 1064.55 30.18
 2 15 0 2.8 1.37
 -3 14 5 68.19 6.72
 -2 14 4 127.5 8.51
 -1 14 3 64.23 5.14
 0 14 2 128.52 4.4
 1 14 1 42.95 2.21
 2 14 0 73.32 3.1
 -3 13 5 107.52 7.97
 -2 13 4 607.64 27.49
 -1 13 3 128.28 7.46
 0 13 2 870.52 24.81
 1 13 1 11.43 1.33
 2 13 0 207.91 6.72
 -4 12 6 42.95 6.12
 -3 12 5 64.68 6.52
 -2 12 4 19.06 3.85
 -1 12 3 2.21 2.35
 0 12 2 121.91 6.43
 1 12 1 42.48 2.06
 2 12 0 29.07 1.91
 -4 11 6 23.71 5.19
 -3 11 5 40.5 5.4
 -2 11 4 75.41 5.94
 -1 11 3 324.11 15.62
 0 11 2 476.75 20.58
 1 11 1 366.45 10.62
 2 11 0 890.37 34.66
 3 11 -1 447.5 19.3
 4 11 -2 99.28 7.17
 -4 10 6 23.82 5.08
 -3 10 5 103.49 7.67
 -2 10 4 16.63 3.62
 -1 10 3 318.54 14.72
 0 10 2 146.41 7.05
 1 10 1 134.35 4.35
 2 10 0 4.72 1.81
 3 10 -1 7.06 1.84
 4 10 -2 35.91 4.65
 -4 9 6 6.4 4.3
 -3 9 5 392.39 18.37
 -2 9 4 25.01 3.84
 -1 9 3 1128.44 46.64
 0 9 2 92.03 4.95
 1 9 1 800.88 32.01
 2 9 0 23.83 2.16
 3 9 -1 99.94 4.14
 4 9 -2 -2.63 3.22
 -4 8 6 30.16 5.32
 -3 8 5 18.75 2.73
 -2 8 4 117.33 7.38
 -1 8 3 236.71 10.61
 0 8 2 3.24 1.51
 1 8 1 432.47 16.2
 2 8 0 217.07 9.22
 3 8 -1 6.38 1.6
 4 8 -2 21.37 4.05
 -4 7 6 42.54 5.56
 -3 7 5 7.75 2.44
 -2 7 4 160.3 8.56
 -1 7 3 200.73 9.97
 0 7 2 1324.14 54.61
 1 7 1 167.67 7.38
 2 7 0 2119.68 60.76
 3 7 -1 33.43 2.27
 4 7 -2 287.01 14.34
 -4 6 6 87.51 7.13
 -3 6 5 2.93 2.26
 -2 6 4 232.93 10.89
 -1 6 3 95.73 5.38
 0 6 2 157.94 6.84
 1 6 1 305.3 12.52
 2 6 0 20.55 1.64
 3 6 -1 29.02 2.23
 4 6 -2 15.94 3.59
 -4 5 6 111.51 8.27
 -3 5 5 84.44 4.5
 -2 5 4 408.85 17.83
 -1 5 3 1197.13 50.26
 0 5 2 1365.31 41.28
 1 5 1 92.18 4.42
 2 5 0 244.52 7.62
 3 5 -1 91.77 3.99
 4 5 -2 172.85 9.49
 -4 4 6 5.74 4.18
 -3 4 5 67.11 5.37
 -2 4 4 61.94 3.11
 -1 4 3 741.02 32.81
 0 4 2 314.46 9.84
 1 4 1 968.21 39.74
 2 4 0 41.8 2.06
 3 4 -1 73.78 3.21
 4 4 -2 4.49 2.98
 -4 3 6 -2.11 3.83
 -3 3 5 145.82 8.39
 -2 3 4 9.11 1.75
 -1 3 3 817.17 24.58
 0 3 2 5.08 0.66
 1 3 1 4318.41 124.22
 2 3 0 307.93 9.19
 3 3 -1 750.24 21.92
 4 3 -2 1.85 3
 -4 2 6 13.38 4.48
 -3 2 5 97.59 6.58
 -2 2 4 125.85 5.02
 -1 2 3 169.6 5.47
 0 2 2 27.29 1.17
 1 2 1 344.58 10.4
 2 2 0 13.93 1.33
 3 2 -1 79.22 3.62
 -4 1 6 80.14 6.66
 -3 1 5 34.13 3.97
 -2 1 4 498.12 15.4
 -1 1 3 251.16 7.79
 0 1 2 3495.93 103.39
 1 1 1 477.85 13.75
 2 1 0 413.78 12.61
 3 1 -1 287.84 9.39
 4 1 -2 243.33 12.25
 -4 0 6 23.75 4.54
 -3 0 5 1.54 2.86
 -2 0 4 324.7 10.21
 -1 0 3 1.16 0.94
 0 0 2 5201.65 149.13
 1 0 1 -0.04 0.46
 2 0 0 287.65 8.88
 3 0 -1 4.96 1.68
 4 0 -2 16.83 3.43
 -4 -1 6 87.6 6.78
 -3 -1 5 29.5 3.98
 -2 -1 4 481.68 15.28
 -1 -1 3 253.21 7.71
 0 -1 2 3648.23 103.52
 1 -1 1 474.27 11.31
 2 -1 0 425.53 12.61
 3 -1 -1 294.34 9.44
 4 -1 -2 235.51 12.17
 -4 -2 6 16.88 4.43
 -3 -2 5 96.37 6.52
 -2 -2 4 151.09 5.92
 -1 -2 3 164.72 5.25
 0 -2 2 25.11 1.12
 1 -2 1 353.9 8.58
 2 -2 0 10.2 1.23
 3 -2 -1 89.3 3.75
 4 -2 -2 0.85 2.76
 -4 -3 6 2.68 3.83
 -3 -3 5 144.37 8.37
 -2 -3 4 16.72 1.98
 -1 -3 3 884.19 24.37
 0 -3 2 6.43 0.59
 1 -3 1 4537.8 128.54
 2 -3 0 292.02 7.57
 3 -3 -1 724.55 31.63
 4 -3 -2 1.12 2.83
 -4 -4 6 2.71 3.76
 -3 -4 5 71.09 5.35
 -2 -4 4 53.39 2.64
 -1 -4 3 817.81 23.48
 0 -4 2 364.15 10.87
 1 -4 1 1017.27 23.82
 2 -4 0 45.12 1.75
 3 -4 -1 57.02 4.24
 4 -4 -2 19.08 3.39
 -4 -5 6 120.89 8.3
 -3 -5 5 93.39 6.12
 -2 -5 4 378.8 18.12
 -1 -5 3 1293.09 52.92
 0 -5 2 1497.68 41.29
 1 -5 1 93.55 2.57
 2 -5 0 239.74 6.3
 3 -5 -1 97.42 5.55
 4 -5 -2 165.24 9.04
 -4 -6 6 86.82 6.89
 -3 -6 5 3.53 3.01
 -2 -6 4 208.93 10.53
 -1 -6 3 99.89 5.28
 0 -6 2 153.96 4.69
 1 -6 1 298.07 7.47
 2 -6 0 30.36 2.69
 3 -6 -1 30.68 3.01
 4 -6 -2 29.37 3.6
 -4 -7 6 47.3 5.39
 -3 -7 5 10.56 2.95
 -2 -7 4 147.71 8.1
 -1 -7 3 210.18 10.06
 0 -7 2 1348.28 57.89
 1 -7 1 160.92 4.34
 2 -7 0 2130.56 68.63
 3 -7 -1 25.05 2.79
 -4 -8 6 42.76 5.33
 -3 -8 5 7.21 2.98
 -2 -8 4 137.61 7.16
 -1 -8 3 217.79 10.42
 0 -8 2 3.87 0.86
 1 -8 1 387.8 12.01
 2 -8 0 204.33 7.5
 3 -8 -1 9.89 2.28
 -4 -9 6 11 4.28
 -3 -9 5 389 18.24
 -2 -9 4 19.7 2.81
 -1 -9 3 1128.75 48.76
 0 -9 2 96.06 3.42
 1 -9 1 808.26 24.02
 2 -9 0 21.95 1.61
 3 -9 -1 96.74 5.65
 -4 -10 6 23.56 4.68
 -3 -10 5 127.69 7.4
 -2 -10 4 15.23 2.85
 -1 -10 3 321.31 14.86
 0 -10 2 146 4.95
 1 -10 1 137.05 4.64
 2 -10 0 9.65 1.39
 -4 -11 6 16.72 4.52
 -3 -11 5 48.79 4.69
 -2 -11 4 89.73 5.46
 -1 -11 3 363.26 15.91
 0 -11 2 499.98 15.15
 1 -11 1 370.93 11.41
 2 -11 0 835.4 27.56
 3 -11 -1 476 20.35
 -4 -12 6 48.35 5.55
 -3 -12 5 68.2 5.58
 -2 -12 4 18.09 3.01
 -1 -12 3 -0.63 1.78
 0 -12 2 118.59 4.47
 1 -12 1 44.4 2.17
 2 -12 0 29.68 1.95
 3 -12 -1 36.67 3.39
 -3 -13 5 102.98 6.88
 -2 -13 4 650.62 28.01
 -1 -13 3 134.98 4.95
 0 -13 2 885.63 26.75
 1 -13 1 11.73 1.39
 2 -13 0 203.23 7.13
 3 -13 -1 -1.95 2.22
 -3 -14 5 71.48 5.74
 -2 -14 4 156.72 8.13
 -1 -14 3 71.59 3.23
 0 -14 2 129.6 4.81
 1 -14 1 46.06 2.36
 2 -14 0 68.95 3.19
 -3 -15 5 122.13 7.67
 -2 -15 4 86.57 5.8
 -1 -15 3 190.83 6.87
 0 -15 2 98.73 3.96
 1 -15 1 1074.15 32.48
 2 -15 0 5.03 1.51
 -3 -16 5 74.5 5.85
 -2 -16 4 11.17 2.07
 -1 -16 3 -0.15 1.45
 0 -16 2 31.63 2.12
 1 -16 1 9.89 1.55
 2 -16 0 7.4 2.06
 -3 -17 5 26.65 2.85
 -2 -17 4 377.42 12.42
 -1 -17 3 392.13 12.72
 0 -17 2 371.61 11.88
 1 -17 1 136.21 5.11
 2 -17 0 81.65 3.8
 -3 -18 5 -0.26 2.97
 -2 -18 4 70.81 3.84
 -1 -18 3 24.81 2.31
 0 -18 2 313.9 10.31
 1 -18 1 24.45 2.02
 2 -18 0 53.18 2.98
 3 -18 -1 3.69 3.54
 -3 -19 5 -4.32 2.96
 -2 -19 4 294.09 10.13
 -1 -19 3 15.67 2.04
 0 -19 2 406.32 13.28
 1 -19 1 24.9 2.11
 2 -19 0 411.17 13.23
 3 -19 -1 63.23 5.94
 -3 -20 5 24.18 3.95
 -2 -20 4 44.35 3.1
 -1 -20 3 0.52 1.77
 0 -20 2 49.58 3.01
 1 -20 1 6.65 1.68
 2 -20 0 11.12 2.01
 3 -20 -1 20.05 4.41
 -3 -21 5 93.35 7.03
 -2 -21 4 2.61 2.24
 -1 -21 3 386.22 12.76
 0 -21 2 12.25 2.06
 1 -21 1 359.05 11.5
 2 -21 0 79.75 6.12
 3 -21 -1 176.65 10.63
 -3 -22 5 14.75 4.02
 -2 -22 4 8.43 3.36
 -1 -22 3 93.89 4.45
 0 -22 2 2.21 1.84
 1 -22 1 246.64 8.52
 2 -22 0 46.86 4.82
 3 -22 -1 4.34 3.99
 -3 -23 5 96.1 7.47
 -1 -23 3 359.28 11.86
 0 -23 2 50.57 3.14
 1 -23 1 148.93 6.69
 2 -23 0 179.84 9.87
 3 -23 -1 43.53 5.68
 -3 -24 5 2.39 4.39
 -2 -24 4 35.86 4.62
 -1 -24 3 -4.25 2.15
 0 -24 2 4.05 1.95
 1 -24 1 3.2 1.92
 2 -24 0 20.65 3.99
 3 -24 -1 0.44 3.97
 -2 -25 4 95.21 7.07
 -1 -25 3 92.66 4.7
 0 -25 2 139.1 5.94
 1 -25 1 3.84 2
 2 -25 0 395.99 18.62
 3 -25 -1 -3.29 4.19
 -2 -26 4 13.18 4.04
 -1 -26 3 16.93 3.83
 0 -26 2 80.39 4.11
 1 -26 1 113.39 5.05
 2 -26 0 25.34 4.5
 3 -26 -1 4.18 4.84
 -2 -27 4 71.26 6.7
 -1 -27 3 127.27 8.48
 0 -27 2 68.77 3.87
 1 -27 1 176.33 6.76
 2 -27 0 4.17 3.7
 3 -27 -1 68.85 7.08
 -2 -28 4 25.85 4.83
 -1 -28 3 20.68 4.23
 0 -28 2 23.61 2.62
 1 -28 1 49.17 5.05
 2 -28 0 1.85 4.13
 3 -28 -1 12.38 5.36
 -2 -29 4 44.63 5.75
 -1 -29 3 7.21 3.85
 0 -29 2 45.98 4.73
 1 -29 1 171.22 9.73
 2 -29 0 55.89 6.04
 -2 -30 4 1.8 4.34
 -1 -30 3 5.86 3.89
 0 -30 2 76.64 5.97
 1 -30 1 6.12 3.74
 2 -30 0 11.91 4.66
 -1 -31 3 -1.26 3.7
 0 -31 2 162.14 9.51
 1 -31 1 3.99 3.65
 2 -31 0 67.88 6.82
 -1 -32 3 4.51 3.96
 0 -32 2 58.28 5.62
 2 -32 0 42.99 6.15
 -1 -33 3 29.63 5.02
 0 -33 2 11.84 3.95
 0 35 1 42.54 5.6
 -1 34 2 2.04 4.4
 0 34 1 159.08 9.92
 1 34 0 32.83 4.85
 -1 33 2 42.83 5.39
 0 33 1 85.62 6.77
 1 33 0 9.63 3.89
 -1 32 2 64.18 6.47
 0 32 1 179.68 10.68
 1 32 0 104.4 7.11
 2 32 -1 21.51 4.79
 -2 31 3 7.27 4.85
 -1 31 2 5.59 3.93
 0 31 1 14.52 4.06
 1 31 0 243.27 11.66
 2 31 -1 2.83 4.04
 -2 30 3 47.58 6.36
 -1 30 2 120.42 8.23
 0 30 1 52.29 5.26
 1 30 0 38.03 4.67
 2 30 -1 29.89 4.88
 -2 29 3 59.63 6.55
 -1 29 2 12.12 4.28
 0 29 1 67.21 5.72
 1 29 0 53.44 5.09
 2 29 -1 11.91 4.18
 -2 28 3 77.76 7.24
 -1 28 2 95.99 7.38
 0 28 1 449.86 20.29
 1 28 0 47.27 4.77
 2 28 -1 87.43 6.95
 -2 27 3 1.68 4.26
 -1 27 2 1.33 3.52
 0 27 1 107.23 4.68
 1 27 0 29.01 2.71
 2 27 -1 126.06 8.31
 3 27 -2 54.49 6.41
 -3 26 4 107.46 8.97
 -2 26 3 37.75 5.47
 -1 26 2 84.67 6.53
 0 26 1 7.01 2.1
 1 26 0 56.87 3.4
 2 26 -1 28.67 4.36
 3 26 -2 45.02 5.79
 -3 25 4 36.12 6.13
 -2 25 3 22.91 4.87
 -1 25 2 58.48 5.56
 0 25 1 3.89 1.88
 1 25 0 106.26 4.63
 2 25 -1 98.25 6.89
 3 25 -2 48.32 5.79
 -3 24 4 37.17 6.16
 -2 24 3 15.29 4.42
 -1 24 2 393.33 18.74
 0 24 1 8.58 1.99
 1 24 0 491.04 15.15
 2 24 -1 40.33 4.64
 3 24 -2 5.21 4.03
 -3 23 4 6.11 5.22
 -2 23 3 4.19 3.86
 -1 23 2 102.04 6.79
 0 23 1 56.36 3.11
 1 23 0 11.22 2.05
 2 23 -1 167.94 9.2
 3 23 -2 4.78 4.13
 -3 22 4 -5.18 4.63
 -2 22 3 187.71 10.65
 -1 22 2 5.1 3.24
 0 22 1 51.97 2.96
 1 22 0 8.02 1.9
 2 22 -1 108.33 6.83
 3 22 -2 1.15 3.65
 -3 21 4 30.72 5.62
 -2 21 3 8.24 3.96
 -1 21 2 176.96 9.59
 0 21 1 58.47 2.98
 1 21 0 43.46 2.71
 2 21 -1 338.95 15.46
 3 21 -2 -0.89 3.44
 -3 20 4 47.18 6.21
 -2 20 3 117.18 8.01
 -1 20 2 294.87 14.15
 0 20 1 235.47 7.67
 1 20 0 579.08 17.43
 2 20 -1 105.8 6.69
 3 20 -2 37.24 4.88
 -3 19 4 50.97 6.38
 -2 19 3 63.25 6.05
 -1 19 2 228.08 12.1
 0 19 1 2.82 1.57
 1 19 0 140.42 5.14
 2 19 -1 41.59 4.09
 3 19 -2 88.81 6.39
 -3 18 4 238.13 13.47
 -2 18 3 74.57 6.32
 -1 18 2 183.3 9.48
 0 18 1 45.26 2.55
 1 18 0 237.61 7.7
 2 18 -1 31.91 3.67
 3 18 -2 102.42 6.86
 -3 17 4 -0.9 4.4
 -2 17 3 124.33 8.27
 -1 17 2 3.48 2.79
 0 17 1 130.6 4.67
 1 17 0 240.3 7.8
 2 17 -1 85.26 5.62
 3 17 -2 268.14 12.41
 -3 16 4 57.23 6.28
 -2 16 3 372.04 17.31
 -1 16 2 10.58 1.31
 0 16 1 1424.08 41.26
 1 16 0 19.62 1.72
 2 16 -1 518.16 15.03
 3 16 -2 39.86 4.3
 -4 15 5 22.52 6.15
 -3 15 4 5.48 4.26
 -2 15 3 455.01 21.41
 -1 15 2 24.03 1.53
 0 15 1 398.52 12.33
 1 15 0 67.65 2.88
 2 15 -1 45.52 2.42
 3 15 -2 27.4 3.91
 -4 14 5 71.53 7.79
 -3 14 4 211.58 11.92
 -2 14 3 324.94 16.15
 -1 14 2 119.49 4.06
 0 14 1 631.7 18.41
 1 14 0 15.53 1.44
 2 14 -1 305.38 9.1
 3 14 -2 154.03 8.16
 4 14 -3 14.67 4.22
 -4 13 5 8.19 5.45
 -3 13 4 64.68 6.15
 -2 13 3 13.51 3.62
 -1 13 2 68.52 2.57
 0 13 1 10.49 1.6
 1 13 0 895.02 25.6
 2 13 -1 82.74 3.3
 3 13 -2 183.17 6.74
 4 13 -3 69.23 6.15
 -3 12 4 339.03 16.79
 -2 12 3 13.35 3.35
 -1 12 2 902.96 24.8
 0 12 1 1115.14 31.78
 1 12 0 964.54 26.66
 2 12 -1 46.57 2.27
 3 12 -2 478.8 14.71
 4 12 -3 5.03 3.83
 -3 11 4 83.63 6.68
 -2 11 3 136.81 8.11
 -1 11 2 934.26 38.11
 0 11 1 545.43 15.72
 1 11 0 113.58 3.92
 2 11 -1 7.55 1.25
 3 11 -2 77.13 5.69
 4 11 -3 60.22 5.6
 -3 10 4 113.21 7.76
 -2 10 3 348.22 16.46
 -1 10 2 404.85 17.95
 0 10 1 927.95 26.95
 1 10 0 1105.87 29.21
 2 10 -1 84.51 2.64
 3 10 -2 56.73 4.62
 4 10 -3 102.68 7.24
 -4 9 5 37.72 5.35
 -3 9 4 5.15 3.61
 -2 9 3 66.1 4.98
 -1 9 2 187.5 9.38
 0 9 1 685.58 19.37
 1 9 0 295.81 8.91
 2 9 -1 525.67 12.66
 3 9 -2 4.57 2.76
 4 9 -3 129.87 8.31
 -4 8 5 142.79 9.29
 -3 8 4 30.56 4.29
 -2 8 3 635.64 28.54
 -1 8 2 1042.83 43.55
 0 8 1 187.62 5.69
 1 8 0 558.45 16.06
 2 8 -1 835.77 19.48
 3 8 -2 194.19 10.05
 4 8 -3 127.31 8.28
 -4 7 5 4.96 3.98
 -3 7 4 105.56 6.86
 -2 7 3 191.68 9.68
 -1 7 2 447.34 19.43
 0 7 1 188.36 5.62
 1 7 0 553.76 16.08
 2 7 -1 215.66 5.56
 3 7 -2 33.65 2.36
 4 7 -3 18.64 3.79
 -4 6 5 1.15 3.73
 -3 6 4 157.77 8.74
 -2 6 3 78.7 5.01
 -1 6 2 1271.86 53.73
 0 6 1 118.91 3.68
 1 6 0 836.16 22.97
 2 6 -1 417.05 10.04
 3 6 -2 83.23 3.7
 4 6 -3 4.8 3.25
 -4 5 5 5.52 3.83
 -3 5 4 56.81 5.04
 -2 5 3 131.94 6.93
 -1 5 2 717.01 28.41
 0 5 1 162.77 4.83
 1 5 0 52.9 1.59
 2 5 -1 161.65 5.42
 3 5 -2 217.56 7.37
 4 5 -3 51.6 4.92
 -4 4 5 82.24 6.77
 -3 4 4 232.35 11.49
 -2 4 3 433.14 18.34
 -1 4 2 34.18 2.6
 0 4 1 1400.58 56.85
 1 4 0 333.2 7.73
 2 4 -1 464.67 13.68
 3 4 -2 106.18 4.28
 4 4 -3 129.53 8.24
 -4 3 5 20.79 4.36
 -3 3 4 19.12 3.22
 -2 3 3 78.88 4.71
 -1 3 2 24.51 2.15
 0 3 1 489.61 21.6
 1 3 0 11.17 0.77
 2 3 -1 426.61 12.67
 3 3 -2 69.35 3.25
 4 3 -3 45.21 4.67
 -4 2 5 28.91 4.47
 -3 2 4 13.38 2.24
 -2 2 3 352.28 15.41
 -1 2 2 89.51 4.3
 0 2 1 470.06 19.86
 1 2 0 32.14 1.29
 2 2 -1 317.69 9.56
 3 2 -2 13.55 1.87
 4 2 -3 9.08 3.24
 -4 1 5 7.92 3.86
 -3 1 4 2.9 2.03
 -2 1 3 215.06 7.03
 -1 1 2 6.78 1.35
 0 1 1 48.25 1.57
 1 1 0 341.91 10.01
 2 1 -1 4.11 1.05
 3 1 -2 261.73 12.5
 4 1 -3 7.34 2.97
 -4 0 5 1.7 3.59
 -3 0 4 289.58 14.22
 -2 0 3 2.71 1.31
 -1 0 2 1005.84 28.39
 0 0 1 -3.53 0.38
 1 0 0 1197.13 34.38
 2 0 -1 0.35 1.01
 3 0 -2 225.54 11.38
 4 0 -3 -0.11 2.98
 -4 -1 5 7.31 3.74
 -3 -1 4 11.6 3.06
 -2 -1 3 213.67 6.94
 -1 -1 2 7.35 0.87
 0 -1 1 48.72 1.56
 1 -1 0 341.61 8.26
 2 -1 -1 3.04 1.11
 3 -1 -2 258.74 12.42
 4 -1 -3 7.26 3.18
 -4 -2 5 30.64 4.39
 -3 -2 4 10.65 2.82
 -2 -2 3 358.63 11.01
 -1 -2 2 85.58 2.94
 0 -2 1 531.64 14.47
 1 -2 0 28.98 1.03
 2 -2 -1 305.27 9.57
 3 -2 -2 6.68 2.34
 4 -2 -3 14.52 3.27
 -4 -3 5 24.41 4.21
 -3 -3 4 10.98 3.1
 -2 -3 3 80.77 3.12
 -1 -3 2 21.47 1.09
 0 -3 1 562.77 15.7
 1 -3 0 10.35 0.64
 2 -3 -1 422.94 18.33
 3 -3 -2 70.3 4.58
 4 -3 -3 62.85 4.98
 -4 -4 5 88.43 6.73
 -3 -4 4 231.47 11.62
 -2 -4 3 448.19 12.92
 -1 -4 2 33.13 1.32
 0 -4 1 1389.6 60.26
 1 -4 0 313.67 8.4
 2 -4 -1 457.79 19.77
 3 -4 -2 103.75 6.09
 4 -4 -3 136.11 8.13
 -4 -5 5 9.45 3.66
 -3 -5 4 56.24 4.75
 -2 -5 3 132.64 4.49
 -1 -5 2 707.02 20.15
 0 -5 1 169.32 5.22
 1 -5 0 49.96 1.99
 2 -5 -1 164.36 7.79
 3 -5 -2 216.16 10.6
 4 -5 -3 47.58 4.63
 -4 -6 5 1.8 3.53
 -3 -6 4 153.97 8.47
 -2 -6 3 78.98 3.03
 -1 -6 2 1360.4 56.46
 0 -6 1 121.07 3.96
 1 -6 0 823.38 24.7
 2 -6 -1 405.73 18.07
 3 -6 -2 84.9 5.28
 4 -6 -3 6.62 3.27
 -4 -7 5 0.32 3.58
 -3 -7 4 99.82 6.25
 -2 -7 3 197.03 6.31
 -1 -7 2 452.36 19.91
 0 -7 1 194.29 6.07
 1 -7 0 598.99 24.48
 2 -7 -1 222.08 9.99
 3 -7 -2 30.87 3.25
 4 -7 -3 36.76 4.09
 -4 -8 5 136.02 8.7
 -3 -8 4 24.83 3.51
 -2 -8 3 695.3 29.66
 -1 -8 2 1056 45.43
 0 -8 1 196.87 6.14
 1 -8 0 584.65 17.29
 2 -8 -1 801.54 25.08
 3 -8 -2 199.2 9.7
 4 -8 -3 141.76 8.08
 -4 -9 5 52.47 5.22
 -3 -9 4 1.17 2.7
 -2 -9 3 70.37 4.54
 -1 -9 2 199.49 9.17
 0 -9 1 714.51 20.87
 1 -9 0 303.32 9.33
 2 -9 -1 527.16 16.31
 3 -9 -2 8.8 2.42
 4 -9 -3 133.27 8.05
 -4 -10 5 120.63 8.05
 -3 -10 4 116.78 6.98
 -2 -10 3 366.55 16.45
 -1 -10 2 412.37 18.13
 0 -10 1 996.14 29.05
 1 -10 0 1029.28 31.39
 2 -10 -1 81.74 3.4
 3 -10 -2 56.68 4.16
 4 -10 -3 89.53 6.38
 -4 -11 5 21.81 4.31
 -3 -11 4 74.84 5.64
 -2 -11 3 144.16 7.54
 -1 -11 2 911.39 27.81
 0 -11 1 557.31 16.95
 1 -11 0 119.61 4.22
 2 -11 -1 8.1 1.46
 3 -11 -2 89.83 5.38
 -3 -12 4 346.2 16.33
 -2 -12 3 18.97 2.83
 -1 -12 2 867.19 26.67
 0 -12 1 1130.1 34.22
 1 -12 0 964.26 30.77
 2 -12 -1 46.12 2.53
 3 -12 -2 479.4 21.14
 -3 -13 4 67.91 5.2
 -2 -13 3 12.73 2.6
 -1 -13 2 64.77 2.94
 0 -13 1 7.06 1.42
 1 -13 0 907.91 27.55
 2 -13 -1 86.47 3.69
 3 -13 -2 180.85 9.34
 -3 -14 4 206.68 10.93
 -2 -14 3 343.35 11.2
 -1 -14 2 115.79 4.47
 0 -14 1 658.06 19.84
 1 -14 0 13.83 1.47
 2 -14 -1 294.61 9.78
 3 -14 -2 149.22 8.08
 -4 -15 5 11.24 3.63
 -2 -15 3 491.96 15.12
 -1 -15 2 23.35 1.86
 0 -15 1 433.34 13.34
 1 -15 0 66.91 3.02
 2 -15 -1 41.54 2.58
 3 -15 -2 34.2 3.71
 -3 -16 4 51.05 3.42
 -2 -16 3 360.79 11.85
 -1 -16 2 12.54 1.66
 0 -16 1 1503.93 44.46
 1 -16 0 21.89 2.75
 2 -16 -1 528.12 16.22
 3 -16 -2 35.1 3.78
 -3 -17 4 0.86 3.08
 -2 -17 3 127.45 5.17
 -1 -17 2 0.68 1.48
 0 -17 1 125.37 4.98
 1 -17 0 246 8.35
 2 -17 -1 86.21 3.91
 3 -17 -2 253.68 12.31
 -3 -18 4 234.13 12.48
 -2 -18 3 74.69 3.75
 -1 -18 2 169.06 6.26
 0 -18 1 54.43 2.86
 1 -18 0 243.88 8.25
 2 -18 -1 29.9 2.4
 -3 -19 4 47.41 4.9
 -2 -19 3 60.14 3.44
 -1 -19 2 243.71 8.43
 0 -19 1 2.84 1.6
 1 -19 0 139.63 5.43
 2 -19 -1 36.97 2.69
 -3 -20 4 49.87 5.09
 -2 -20 3 122.3 7.42
 -1 -20 2 292.6 9.88
 0 -20 1 236.25 8.2
 1 -20 0 602.57 18.72
 2 -20 -1 111.48 4.81
 -3 -21 4 27.78 4.63
 -2 -21 3 5.75 3.13
 -1 -21 2 167.7 6.47
 0 -21 1 56.03 3.11
 1 -21 0 45.03 2.84
 2 -21 -1 336.75 11.46
 -3 -22 4 -1.28 3.45
 -2 -22 3 156.78 9.75
 -1 -22 2 -0.3 1.94
 0 -22 1 51.93 3.01
 1 -22 0 11.18 2.06
 2 -22 -1 106.7 4.88
 -3 -23 4 13.96 4.31
 -2 -23 3 7.37 3.4
 -1 -23 2 88.64 4.4
 0 -23 1 53.24 3.11
 1 -23 0 14.87 2.18
 2 -23 -1 168.73 6.68
 -3 -24 4 39.43 5.34
 -2 -24 3 12.17 3.95
 -1 -24 2 413.15 19.22
 0 -24 1 5.8 1.88
 1 -24 0 518.39 16.27
 2 -24 -1 43.71 3.28
 -2 -25 3 35.11 4.65
 -1 -25 2 52.02 5.07
 0 -25 1 4.55 1.79
 1 -25 0 109.1 4.89
 2 -25 -1 103.97 7.38
 -3 -26 4 94.2 8
 -2 -26 3 40.4 5.27
 -1 -26 2 90.34 6.64
 0 -26 1 5.95 2.01
 1 -26 0 56.48 3.54
 2 -26 -1 27.74 4.8
 -2 -27 3 3.61 3.81
 -1 -27 2 1.64 3.35
 0 -27 1 103.3 6.87
 1 -27 0 29.31 2.83
 2 -27 -1 149.54 9.17
 -2 -28 3 72.1 6.79
 -1 -28 2 93.25 6.97
 0 -28 1 447.87 21.03
 1 -28 0 48.75 3.42
 2 -28 -1 98.45 7.44
 -2 -29 3 50.06 6.27
 -1 -29 2 16.28 3.9
 0 -29 1 59.21 5.26
 1 -29 0 54.3 3.67
 2 -29 -1 13.78 4.41
 -2 -30 3 56.97 6.49
 -1 -30 2 111.03 8.16
 0 -30 1 43.63 4.98
 1 -30 0 37.63 4.81
 2 -30 -1 27.36 5.38
 -2 -31 3 3.73 4.76
 -1 -31 2 0.17 3.71
 0 -31 1 15.04 3.81
 1 -31 0 206.95 11.94
 2 -31 -1 2.24 4.31
 -1 -32 2 72.41 6.33
 0 -32 1 194.79 10.95
 -1 -33 2 29.89 4.95
 0 -33 1 74.63 6.35
 -1 -34 2 2.39 3.9
 0 -34 1 162.57 9.98
 0 -35 1 40.75 5.19
 -1 34 1 58.33 6.26
 1 34 -1 54.83 5.85
 -1 33 1 27.44 4.86
 1 33 -1 21.1 4.33
 -2 32 2 94.42 8.23
 -1 32 1 14.85 4.5
 0 32 0 205.08 11.13
 1 32 -1 19.12 4.26
 2 32 -2 100.36 7.67
 -2 31 2 -2.52 4.13
 -1 31 1 4.29 4.16
 0 31 0 11.17 3.76
 1 31 -1 5.7 3.73
 2 31 -2 4.86 4.24
 -2 30 2 51.8 6.37
 -1 30 1 10.85 4
 0 30 0 216.38 11.44
 1 30 -1 17.26 4.06
 2 30 -2 60.35 6.21
 -2 29 2 9.06 4.53
 -1 29 1 17.44 4.05
 0 29 0 3.58 2.27
 1 29 -1 12.72 3.88
 2 29 -2 9.49 4.32
 -2 28 2 5.93 4.25
 -1 28 1 283.87 14.55
 0 28 0 12.37 2.46
 1 28 -1 300.19 13.95
 2 28 -2 3.3 3.72
 -3 27 3 -0.27 4.97
 -2 27 2 42.44 5.76
 -1 27 1 4.25 3.48
 0 27 0 6.36 2.2
 1 27 -1 7.51 3.29
 2 27 -2 41.61 5.06
 3 27 -3 2.62 4.28
 -3 26 3 22.28 5.76
 -2 26 2 211.14 12.19
 -1 26 1 216.48 11.88
 0 26 0 165.46 6.23
 1 26 -1 248.48 11.56
 2 26 -2 209.83 11.34
 3 26 -3 19.31 4.85
 -3 25 3 -1.75 4.6
 -2 25 2 17.33 4.58
 -1 25 1 6.76 3.66
 0 25 0 13.35 2.14
 1 25 -1 0.5 2.87
 2 25 -2 15.4 3.88
 3 25 -3 2.52 4.02
 -3 24 3 57.55 7
 -2 24 2 261.43 14.61
 -1 24 1 54.08 5.03
 0 24 0 295.35 9.43
 1 24 -1 48.57 4.54
 2 24 -2 286.09 13.79
 3 24 -3 54.96 5.98
 -3 23 3 7.62 4.86
 -2 23 2 1.8 4.02
 -1 23 1 84.42 6.21
 0 23 0 6.05 1.76
 1 23 -1 85.25 3.86
 2 23 -2 3.05 3.39
 3 23 -3 1.31 3.79
 -3 22 3 193.65 12.05
 -2 22 2 47.09 5.47
 -1 22 1 610.84 26.14
 0 22 0 162.97 5.75
 1 22 -1 598.59 17.64
 2 22 -2 45.68 4.65
 3 22 -3 182.75 10.64
 -3 21 3 7.34 4.76
 -2 21 2 2.91 4.04
 -1 21 1 5.56 3.03
 0 21 0 1.62 1.54
 1 21 -1 6.57 1.7
 2 21 -2 10.72 3.23
 3 21 -3 5.52 3.74
 -3 20 3 192.22 11.72
 -2 20 2 257.53 13.89
 -1 20 1 197.59 10.52
 0 20 0 22.03 2
 1 20 -1 194.26 6.72
 2 20 -2 272.29 13.07
 3 20 -3 194.46 10.48
 -3 19 3 7.68 4.39
 -2 19 2 15.96 4.06
 -1 19 1 2.39 1.47
 1 19 -1 0.68 1.45
 2 19 -2 11.99 3.26
 3 19 -3 11.46 3.6
 -3 18 3 4.12 3.97
 -2 18 2 525.91 23.38
 -1 18 1 2.69 1.46
 0 18 0 787.31 22.37
 1 18 -1 2.42 1.42
 2 18 -2 502.54 22.05
 3 18 -3 3.4 3.24
 -4 17 4 4.22 5.32
 -3 17 3 18.13 4.65
 -2 17 2 59.52 5.41
 -1 17 1 14.39 1.73
 0 17 0 1.96 1.3
 1 17 -1 19.9 1.79
 2 17 -2 61.05 4.78
 3 17 -3 12.63 3.58
 -4 16 4 11.59 5.24
 -3 16 3 333.11 16.68
 -2 16 2 119.39 7.67
 -1 16 1 145.06 4.97
 0 16 0 1.9 1.26
 1 16 -1 144.35 4.88
 2 16 -2 125.94 7.03
 3 16 -3 318.01 15.39
 4 16 -4 0.03 4.02
 -4 15 4 5.65 4.7
 -3 15 3 27.27 4.66
 -2 15 2 -2.12 2.83
 -1 15 1 2.57 1.38
 0 15 0 5.04 1.28
 1 15 -1 6.75 1.33
 2 15 -2 4.18 2.51
 3 15 -3 33.89 2.97
 4 15 -4 9.41 3.98
 -4 14 4 8.14 4.86
 -3 14 3 225.18 11.77
 -2 14 2 175.44 9.06
 -1 14 1 208.92 6.55
 0 14 0 138.78 4.84
 1 14 -1 206.86 6.46
 2 14 -2 147.58 8.1
 3 14 -3 211.56 7.86
 4 14 -4 6.46 4
 -4 13 4 9.65 4.84
 -3 13 3 3.68 3.68
 -2 13 2 37.09 4.04
 -1 13 1 424.75 11.96
 0 13 0 3.56 1.19
 1 13 -1 411.97 11.88
 2 13 -2 39.95 2.57
 3 13 -3 4.14 2.11
 4 13 -4 4.25 3.83
 -4 12 4 109.97 8.57
 -3 12 3 56.11 5.3
 -2 12 2 510.58 23.26
 -1 12 1 64.15 2.64
 0 12 0 168.42 5.31
 1 12 -1 66.19 2.61
 2 12 -2 546.18 13.11
 3 12 -3 51.94 3.23
 4 12 -4 127.71 8.42
 -4 11 4 11.69 4.81
 -3 11 3 86.3 6.48
 -2 11 2 23.64 3.22
 -1 11 1 8.31 1.14
 0 11 0 26.98 2.15
 1 11 -1 11.06 1.12
 2 11 -2 19.86 1.37
 3 11 -3 96.15 4.3
 4 11 -4 12.9 3.87
 -4 10 4 48.32 6
 -3 10 3 132.89 8.12
 -2 10 2 66.03 4.54
 -1 10 1 548.49 14.96
 0 10 0 1307.41 34.33
 1 10 -1 506.83 14.87
 2 10 -2 59.34 2.13
 3 10 -3 140.06 5.47
 4 10 -4 53 5.34
 -4 9 4 -1.22 4.17
 -3 9 3 4.74 3.14
 -2 9 2 33.15 3.38
 -1 9 1 90.2 3.13
 1 9 -1 93.99 3.15
 2 9 -2 34.16 1.57
 3 9 -3 5.9 1.91
 4 9 -4 1.71 3.63
 -3 8 3 111.27 7.04
 -2 8 2 999.53 27.77
 -1 8 1 756.93 21.15
 0 8 0 1336.16 36.95
 1 8 -1 734.09 17.67
 2 8 -2 1012.63 23.31
 3 8 -3 117.92 4.71
 4 8 -4 78.36 6.35
 -3 7 3 2.22 2.77
 -2 7 2 613.25 17.87
 -1 7 1 39.89 1.58
 1 7 -1 40.99 1.4
 2 7 -2 653.99 15.06
 3 7 -3 -0.29 1.63
 4 7 -4 25.67 4.16
 -3 6 3 2.49 2.79
 -2 6 2 329.19 9.79
 -1 6 1 1498.49 40.4
 0 6 0 1180.99 32.24
 1 6 -1 1433.14 33.7
 2 6 -2 349.89 8.31
 3 6 -3 4.32 1.68
 4 6 -4 208.94 11.8
 -4 5 4 11.84 3.84
 -3 5 3 0.89 2.69
 -2 5 2 3.36 0.84
 -1 5 1 179.26 5.24
 0 5 0 0.52 0.85
 1 5 -1 182.09 4.44
 2 5 -2 2.54 0.89
 3 5 -3 6.64 2.68
 4 5 -4 0.63 3.09
 -4 4 4 11.15 3.72
 -3 4 3 383.03 16.72
 -2 4 2 42.53 3.25
 -1 4 1 9232.72 255.57
 0 4 0 1739.27 46.25
 1 4 -1 9620.71 213.03
 2 4 -2 48.77 1.77
 3 4 -3 375.02 17.38
 4 4 -4 10.51 3.55
 -4 3 4 -5.89 3.01
 -3 3 3 35.51 3.68
 -2 3 2 338.34 14.35
 -1 3 1 2333.96 89.71
 0 3 0 -0.03 0.36
 1 3 -1 2327.4 52.01
 2 3 -2 342.88 8.21
 3 3 -3 28.26 3.52
 4 3 -4 4.48 3.07
 -4 2 4 64.85 5.77
 -3 2 3 442.96 18.71
 -2 2 2 417.92 16.89
 -1 2 1 514.9 21.06
 1 2 -1 534.23 12.18
 2 2 -2 399.82 9.68
 3 2 -3 434.07 19.61
 4 2 -4 66.25 5.59
 -4 1 4 4.19 3.63
 -2 1 2 17.01 2.02
 -1 1 1 627.48 25.48
 1 1 -1 638.18 14.77
 2 1 -2 11.82 2.13
 3 1 -3 26.97 3.38
 4 1 -4 19.82 3.68
 -4 0 4 195.23 11.03
 -3 0 3 3.52 1.72
 -2 0 2 1520.56 60.8
 -1 0 1 -1.32 0.8
 1 0 -1 -1.17 0.44
 2 0 -2 1540.49 64.29
 3 0 -3 -3.98 2.13
 4 0 -4 200.9 10.79
 -4 -1 4 16.03 3.96
 -3 -1 3 26.6 2.25
 1 -1 -1 649.44 26.92
 2 -1 -2 9.02 1.95
 3 -1 -3 43.82 3.71
 4 -1 -4 9.48 3.32
 -4 -2 4 66.4 5.57
 -3 -2 3 432.93 13.43
 -2 -2 2 398.95 12.12
 -1 -2 1 526.61 22.25
 1 -2 -1 505.51 22.14
 2 -2 -2 403.14 17.76
 3 -2 -3 410.78 19.44
 4 -2 -4 65.23 5.49
 -4 -3 4 0.35 3.46
 -3 -3 3 39.4 3.8
 -2 -3 2 335.17 10.22
 -1 -3 1 2205.98 94.96
 0 -3 0 -0.85 0.31
 1 -3 -1 2141.47 94.49
 2 -3 -2 320.77 14.92
 3 -3 -3 31.96 3.46
 4 -3 -4 0.66 3.06
 -4 -4 4 9.86 3.5
 -3 -4 3 367.47 17.29
 -2 -4 2 41.45 3.12
 -1 -4 1 9475.45 389.52
 0 -4 0 1629.87 49.74
 1 -4 -1 8682.58 387.55
 2 -4 -2 43.06 3.16
 3 -4 -3 373.13 17.2
 4 -4 -4 8.72 3.45
 -4 -5 4 2.41 3.19
 -3 -5 3 7.15 2.77
 -2 -5 2 1.95 1.74
 -1 -5 1 173.07 8.03
 1 -5 -1 177.65 5.75
 2 -5 -2 4.62 1.8
 3 -5 -3 -0.36 2.29
 4 -5 -4 22.42 3.75
 -4 -6 4 240.48 12.04
 -3 -6 3 4.64 2.52
 -2 -6 2 342.23 15.14
 -1 -6 1 1561.39 61.55
 0 -6 0 1156.5 34.65
 1 -6 -1 1449.68 43.45
 2 -6 -2 313.06 15.04
 3 -6 -3 6.8 2.59
 4 -6 -4 217.76 11.66
 -4 -7 4 29.22 4.3
 -3 -7 3 -0.53 2.14
 -2 -7 2 633.07 27.43
 -1 -7 1 43.82 2.57
 1 -7 -1 43.45 1.88
 2 -7 -2 625.51 27.33
 3 -7 -3 2.57 2.49
 4 -7 -4 20.07 3.86
 -4 -8 4 89.61 6.37
 -3 -8 3 120.64 6.79
 -2 -8 2 1026.29 42.51
 -1 -8 1 794.27 22.78
 0 -8 0 1341.81 39.73
 1 -8 -1 765.74 22.79
 2 -8 -2 931.06 42.27
 3 -8 -3 113.38 6.73
 4 -8 -4 80.55 6.03
 -4 -9 4 6.07 3.4
 -3 -9 3 7.07 2.67
 -2 -9 2 29.73 2.86
 -1 -9 1 91.47 3.37
 1 -9 -1 91.96 3.41
 2 -9 -2 29.95 2.83
 3 -9 -3 8.36 2.7
 4 -9 -4 7.31 3.42
 -3 -10 3 143.49 7.64
 -2 -10 2 55.2 3.86
 -1 -10 1 527.97 15.98
 0 -10 0 1164.56 36.79
 1 -10 -1 516.22 16.03
 2 -10 -2 58.17 3.91
 3 -10 -3 132.57 7.57
 4 -10 -4 60.64 5.34
 -3 -11 3 90.65 5.85
 -2 -11 2 24.19 2.49
 -1 -11 1 6.49 1.17
 0 -11 0 27.4 2.49
 1 -11 -1 9.16 1.18
 2 -11 -2 22.82 2.55
 3 -11 -3 91.34 5.84
 4 -11 -4 18.82 3.8
 -3 -12 3 48.05 4.33
 -2 -12 2 539.03 16.84
 -1 -12 1 65.02 2.73
 0 -12 0 156.37 5.54
 1 -12 -1 62.01 2.73
 2 -12 -2 558.11 23.78
 3 -12 -3 45.82 4.35
 4 -12 -4 116.12 7.77
 -3 -13 3 4.67 2.65
 -2 -13 2 38.84 2.41
 -1 -13 1 405.13 12.69
 0 -13 0 5.12 1.13
 1 -13 -1 382.48 12.69
 2 -13 -2 42.58 3.51
 3 -13 -3 10.05 3.16
 4 -13 -4 4.53 3.78
 -4 -14 4 3.65 3.23
 -3 -14 3 214.65 7.86
 -2 -14 2 165.94 5.93
 -1 -14 1 201.07 6.87
 0 -14 0 145.44 5.12
 1 -14 -1 200.72 6.91
 2 -14 -2 159.01 8.33
 3 -14 -3 227.01 11.25
 -4 -15 4 5.76 3.35
 -3 -15 3 31.32 4.08
 -2 -15 2 1.69 1.61
 -1 -15 1 2.8 1.36
 0 -15 0 3.24 1.17
 1 -15 -1 3.84 1.33
 2 -15 -2 1.33 2.17
 3 -15 -3 34.09 3.96
 -4 -16 4 11.66 3.62
 -3 -16 3 343.64 16.41
 -2 -16 2 125.25 4.91
 -1 -16 1 138.22 5.16
 0 -16 0 2.46 1.24
 1 -16 -1 136.72 5.15
 2 -16 -2 114.23 6.7
 3 -16 -3 344.69 16.06
 -4 -17 4 3.38 3.48
 -3 -17 3 10.4 3.17
 -2 -17 2 59.68 3.22
 -1 -17 1 18.61 1.82
 0 -17 0 1.32 1.25
 1 -17 -1 16.81 1.83
 2 -17 -2 63.34 4.51
 3 -17 -3 10.94 3.24
 -4 -18 4 69.69 6.27
 -3 -18 3 1.58 2.99
 -2 -18 2 536.16 23.62
 -1 -18 1 1.16 1.5
 0 -18 0 774.32 23.95
 1 -18 -1 2.36 1.38
 2 -18 -2 503.13 23.11
 3 -18 -3 -2.29 2.79
 -3 -19 3 4.11 3.32
 -2 -19 2 14.27 3.34
 -1 -19 1 1.56 1.55
 1 -19 -1 0.8 1.57
 2 -19 -2 13.11 2.14
 3 -19 -3 3.66 3.13
 -3 -20 3 196.39 10.88
 -2 -20 2 280.5 13.75
 -1 -20 1 204.17 7.23
 0 -20 0 22.69 3.14
 1 -20 -1 200.47 7.2
 2 -20 -2 271.57 9.57
 3 -20 -3 169.16 10.16
 -3 -21 3 3.46 3.59
 -2 -21 2 1.79 3.2
 -1 -21 1 0.55 1.76
 0 -21 0 1.5 1.54
 1 -21 -1 7.86 1.82
 2 -21 -2 3.21 2.07
 3 -21 -3 9.78 3.65
 -3 -22 3 195.04 11.22
 -2 -22 2 37.26 4.5
 -1 -22 1 573.07 26.97
 0 -22 0 153.85 5.97
 1 -22 -1 601.1 18.9
 2 -22 -2 41.91 3.12
 -3 -23 3 2.73 3.73
 -2 -23 2 3.03 3.33
 -1 -23 1 82.79 6.15
 0 -23 0 3.65 1.64
 1 -23 -1 86.01 4.18
 2 -23 -2 0.87 2.16
 -3 -24 3 59.44 6.08
 -2 -24 2 283.29 14.71
 -1 -24 1 57.24 5.07
 0 -24 0 286.79 9.96
 1 -24 -1 51.22 3.29
 2 -24 -2 289.06 10.22
 -3 -25 3 -0.53 3.95
 -2 -25 2 20.39 4.31
 -1 -25 1 -3.23 2.83
 0 -25 0 12.07 3.25
 1 -25 -1 3.31 2.09
 2 -25 -2 19.44 2.76
 -3 -26 3 15.38 4.67
 -2 -26 2 221.96 12.29
 -1 -26 1 215.65 12.13
 0 -26 0 167.54 9.52
 1 -26 -1 224.37 8.34
 2 -26 -2 210.36 8.29
 -3 -27 3 0.28 4.26
 -2 -27 2 38.64 5.47
 -1 -27 1 6.29 3.37
 0 -27 0 5.91 2.85
 1 -27 -1 4.27 2.32
 2 -27 -2 45.6 3.61
 -2 -28 2 -2.5 3.81
 -1 -28 1 268.3 14.87
 0 -28 0 9.99 3.23
 1 -28 -1 306.02 14.97
 2 -28 -2 3.26 3.43
 -2 -29 2 13.05 4.49
 -1 -29 1 15.02 3.86
 0 -29 0 3.7 2.94
 1 -29 -1 9.75 3.94
 -2 -30 2 55.79 6.11
 -1 -30 1 16.25 3.84
 0 -30 0 220.59 12
 1 -30 -1 13.61 4.14
 -2 -31 2 8.76 4.34
 -1 -31 1 -3.97 3.23
 0 -31 0 13.17 3.75
 1 -31 -1 0.3 3.76
 -2 -32 2 98.96 8.31
 -1 -32 1 10.4 3.95
 0 -32 0 199.52 11.53
 1 -32 -1 13.4 4.22
 -1 -33 1 20.34 4.37
 0 -33 0 14.4 4.08
 1 -33 -1 22.1 4.83
 -1 -34 1 62.64 6.23
 0 -34 0 17.37 4.34
 1 -34 -1 61.12 6.22
 0 -35 0 -0.5 3.81
 -1 34 0 29.93 5.11
 1 34 -2 -0.26 3.85
 -1 33 0 7.09 4.23
 1 33 -2 27.35 4.74
 -2 32 1 13.61 4.99
 -1 32 0 98.28 7.45
 1 32 -2 68.45 6.07
 -2 31 1 5.03 4.49
 -1 31 0 212.05 12.06
 0 31 -1 20.63 3.74
 1 31 -2 5.86 3.76
 2 31 -3 1.94 4.16
 -2 30 1 29.3 5.28
 -1 30 0 36.66 4.84
 0 30 -1 50.11 4.66
 1 30 -2 116.24 7.65
 2 30 -3 56.73 5.93
 -2 29 1 11.19 4.54
 -1 29 0 55.32 5.52
 0 29 -1 62.18 3.67
 1 29 -2 16.81 3.88
 2 29 -3 62.76 6.12
 -2 28 1 82.78 7.42
 -1 28 0 47.55 5.16
 0 28 -1 441.4 13.82
 1 28 -2 90.29 6.58
 2 28 -3 77.67 6.65
 -3 27 2 75.35 7.79
 -2 27 1 130.9 9.1
 -1 27 0 20.85 3.98
 0 27 -1 108.44 4.69
 1 27 -2 -0.68 2.9
 2 27 -3 2.12 3.78
 -3 26 2 47.03 6.84
 -2 26 1 18.86 4.71
 -1 26 0 48.76 5.22
 0 26 -1 7.59 2
 1 26 -2 88.4 6.05
 2 26 -3 37.71 4.9
 -3 25 2 51.52 6.79
 -2 25 1 92.64 7.63
 -1 25 0 93.67 6.96
 0 25 -1 3.95 1.91
 1 25 -2 57.14 4.9
 2 25 -3 30.64 4.49
 3 25 -4 31.19 5.22
 -3 24 2 15.03 5.18
 -2 24 1 47.07 5.57
 -1 24 0 493.99 22.38
 0 24 -1 5.63 1.93
 1 24 -2 394.27 17.75
 2 24 -3 12.45 3.83
 3 24 -4 32.25 5.05
 -3 23 2 11.33 4.9
 -2 23 1 159.4 10
 -1 23 0 10.55 3.38
 0 23 -1 52.91 3.12
 1 23 -2 88.5 5.94
 2 23 -3 9.93 3.57
 3 23 -4 11.73 4.28
 -3 22 2 3.31 4.36
 -2 22 1 111.36 7.7
 -1 22 0 7.7 2.09
 0 22 -1 50.22 3
 1 22 -2 3.85 2.74
 2 22 -3 175.7 9.7
 3 22 -4 2.87 3.73
 -3 21 2 7.86 4.57
 -2 21 1 350.46 16.54
 -1 21 0 40.82 2.84
 0 21 -1 50 2.96
 1 21 -2 175.7 8.93
 2 21 -3 7.03 3.34
 3 21 -4 25.77 4.48
 -3 20 2 37.82 5.32
 -2 20 1 102.25 7.26
 -1 20 0 601.9 17.56
 0 20 -1 227.35 7.71
 1 20 -2 274.58 13.2
 2 20 -3 113.47 7.2
 3 20 -4 52.49 5.36
 -4 19 3 -0.69 4.91
 -3 19 2 79.34 6.75
 -2 19 1 35.64 4.63
 -1 19 0 139.88 5.23
 0 19 -1 2.01 1.58
 1 19 -2 275.56 11.67
 2 19 -3 62.39 5.14
 3 19 -4 47.24 5.19
 -4 18 3 49.19 6.44
 -3 18 2 99.57 7.48
 -2 18 1 32.47 4.29
 -1 18 0 237.27 7.82
 0 18 -1 54.95 2.82
 1 18 -2 172.58 5.84
 2 18 -3 69.43 5.44
 3 18 -4 244.54 12.3
 -4 17 3 16.02 5.11
 -3 17 2 221 12.79
 -2 17 1 85 6.2
 -1 17 0 241.93 7.88
 0 17 -1 137.83 5.72
 1 17 -2 2.85 1.38
 2 17 -3 120.36 7.28
 3 17 -4 3.57 2.35
 -4 16 3 50.41 6.19
 -3 16 2 34.03 4.7
 -2 16 1 506.72 22.4
 -1 16 0 19.76 1.82
 0 16 -1 1549.04 41.43
 1 16 -2 13.53 1.48
 2 16 -3 340.21 16
 3 16 -4 56.64 3.68
 -4 15 3 63.51 6.51
 -3 15 2 26.21 4.33
 -2 15 1 39.1 4.1
 -1 15 0 69.7 2.96
 0 15 -1 416.85 12.47
 1 15 -2 24.1 1.69
 2 15 -3 463.18 14.7
 3 15 -4 1.83 2.28
 4 15 -5 16.81 3.27
 -4 14 3 6.94 4.38
 -3 14 2 142.59 8.77
 -2 14 1 305.38 13.84
 -1 14 0 6.64 1.38
 0 14 -1 662.25 18.54
 1 14 -2 118.28 4.14
 2 14 -3 334.37 10.98
 3 14 -4 204.87 7.7
 4 14 -5 72.74 4.52
 -4 13 3 66.68 6.61
 -3 13 2 163.32 9.7
 -2 13 1 79.71 5.37
 -1 13 0 919.13 25.64
 0 13 -1 8.78 1.66
 1 13 -2 71.27 2.73
 2 13 -3 17.81 2.02
 3 13 -4 65.06 3.75
 4 13 -5 0.16 3.72
 -4 12 3 2.63 4.09
 -3 12 2 451.81 20.97
 -2 12 1 48.87 3.93
 -1 12 0 963.76 26.65
 0 12 -1 1154.24 31.9
 1 12 -2 884.41 24.84
 2 12 -3 14.88 1.88
 3 12 -4 335.42 11.27
 4 12 -5 3.94 3.63
 -4 11 3 48.66 5.93
 -3 11 2 78.65 5.76
 -2 11 1 7.49 1.16
 -1 11 0 116.78 3.91
 0 11 -1 549.24 15.82
 1 11 -2 938.9 21.61
 2 11 -3 145.7 5.34
 3 11 -4 78.39 4
 4 11 -5 21.08 4.36
 -4 10 3 98.49 7.48
 -3 10 2 48.8 4.57
 -2 10 1 78.92 2.99
 -1 10 0 1069.85 29.16
 0 10 -1 970.55 27.41
 1 10 -2 416.65 9.94
 2 10 -3 368.01 11.34
 3 10 -4 113.18 4.83
 4 10 -5 122.33 8.25
 -4 9 3 135.82 8.79
 -3 9 2 6.47 2.97
 -2 9 1 520.36 15
 -1 9 0 289.16 8.62
 0 9 -1 695.44 19.45
 1 9 -2 196.43 4.96
 2 9 -3 69.01 3.22
 3 9 -4 2.33 1.87
 4 9 -5 52.29 5.39
 -4 8 3 131.15 8.57
 -3 8 2 186.05 9.78
 -2 8 1 841.63 23.2
 -1 8 0 556.66 16
 0 8 -1 190.68 5.76
 1 8 -2 1093.19 24.9
 2 8 -3 679.41 20.09
 3 8 -4 29.88 2.54
 4 8 -5 138.84 8.86
 -4 7 3 36.68 4.76
 -3 7 2 37.18 3.82
 -2 7 1 210.92 6.52
 -1 7 0 587.89 16.06
 0 7 -1 194.02 5.67
 1 7 -2 464.05 10.9
 2 7 -3 200.23 6.61
 3 7 -4 103.75 4.34
 4 7 -5 0.78 3.58
 -4 6 3 4.05 3.61
 -3 6 2 83.68 5.54
 -2 6 1 408.96 11.89
 -1 6 0 835.37 22.93
 0 6 -1 126.32 3.72
 1 6 -2 1348.86 33.5
 2 6 -3 79.13 3.33
 3 6 -4 150.23 5.65
 4 6 -5 -0.58 3.34
 -4 5 3 52.67 5.19
 -3 5 2 221.91 10.53
 -2 5 1 165.2 5.09
 -1 5 0 55.18 1.85
 0 5 -1 166.2 4.84
 1 5 -2 683.55 17.74
 2 5 -3 133.11 4.74
 3 5 -4 58.38 3.11
 4 5 -5 13.75 3.75
 -3 4 2 107.38 6.13
 -2 4 1 449.19 12.99
 -1 4 0 338.23 9.21
 0 4 -1 1485.1 32.95
 1 4 -2 34.85 1.66
 2 4 -3 424.05 12.81
 3 4 -4 231.15 7.66
 4 4 -5 88.21 6.71
 -3 3 2 72.45 4.74
 -2 3 1 408.19 17.52
 -1 3 0 10.54 0.91
 0 3 -1 560.11 15.36
 1 3 -2 24.55 1.32
 2 3 -3 77.84 3.14
 3 3 -4 11.65 1.84
 4 3 -5 25.76 4.21
 -3 2 2 5.84 2.45
 -2 2 1 309.48 13.19
 -1 2 0 29.22 1.53
 0 2 -1 516.32 20.97
 1 2 -2 88.4 3.19
 2 2 -3 368.68 10.82
 3 2 -4 10.26 2.73
 4 2 -5 30.64 4.33
 -4 1 3 3.96 3.1
 -3 1 2 257.53 11.86
 0 1 -1 49.49 1.52
 1 1 -2 6.49 0.82
 2 1 -3 209.11 6.71
 3 1 -4 13.14 3.09
 4 1 -5 11.94 3.6
 -4 0 3 -0.21 2.81
 -3 0 2 245.91 10.88
 0 0 -1 -4.78 0.28
 1 0 -2 961.25 27.76
 2 0 -3 0.53 1.04
 3 0 -4 296.14 14.1
 4 0 -5 1.54 3.29
 -4 -1 3 12.05 3.5
 -3 -1 2 268.71 11.81
 0 -1 -1 50.04 1.52
 1 -1 -2 5.26 0.71
 2 -1 -3 219.01 6.66
 3 -1 -4 2.03 2.65
 4 -1 -5 5.84 3.43
 -4 -2 3 4.19 3.29
 -3 -2 2 16.14 2.65
 0 -2 -1 479.07 14.1
 1 -2 -2 83.76 2.73
 2 -2 -3 357 10.64
 3 -2 -4 9.76 2.68
 4 -2 -5 24.03 4.02
 -4 -3 3 51.5 4.97
 -3 -3 2 67.04 3.1
 0 -3 -1 520.87 22.74
 1 -3 -2 20.47 0.98
 2 -3 -3 67.93 4.53
 3 -3 -4 20.22 3.15
 4 -3 -5 22.41 4.13
 -4 -4 3 150.99 8.49
 -3 -4 2 111.5 4.2
 0 -4 -1 1385.83 59.92
 1 -4 -2 28.34 2.25
 2 -4 -3 387.77 18.83
 3 -4 -4 225.44 11.47
 4 -4 -5 84.27 6.51
 -4 -5 3 50.66 4.81
 -3 -5 2 218.21 10.69
 -2 -5 1 167.08 7.82
 -1 -5 0 50.7 1.92
 0 -5 -1 170.02 5.66
 1 -5 -2 696.76 29.47
 2 -5 -3 121.4 6.73
 3 -5 -4 60.09 4.8
 4 -5 -5 2.02 3.33
 -4 -6 3 6.76 3.32
 -3 -6 2 93.07 5.4
 -2 -6 1 431.73 18.18
 -1 -6 0 849.67 28.19
 0 -6 -1 117.72 3.89
 1 -6 -2 1374.44 56.21
 2 -6 -3 78 4.87
 3 -6 -4 154.8 8.41
 4 -6 -5 -0.37 3.22
 -4 -7 3 23.33 3.86
 -3 -7 2 30.29 3.27
 -2 -7 1 221.63 9.96
 -1 -7 0 587.58 17.26
 0 -7 -1 185.34 5.97
 1 -7 -2 460.54 19.86
 2 -7 -3 202.17 9.62
 3 -7 -4 93.3 6.22
 -4 -8 3 134.4 8.03
 -3 -8 2 195.53 9.68
 -2 -8 1 840.17 35.31
 -1 -8 0 591.58 17.21
 0 -8 -1 188.07 6.06
 1 -8 -2 1065.98 45.26
 2 -8 -3 711.94 29.6
 3 -8 -4 27.63 3.59
 4 -8 -5 142.14 8.76
 -3 -9 2 5.52 2.41
 -2 -9 1 539.55 16.23
 -1 -9 0 304.93 9.24
 0 -9 -1 670.74 20.74
 1 -9 -2 193.75 9.12
 2 -9 -3 68.25 4.59
 3 -9 -4 5.22 2.71
 4 -9 -5 49.6 5.38
 -3 -10 2 55.1 4.03
 -2 -10 1 76.32 3.28
 -1 -10 0 1002.8 31.28
 0 -10 -1 985.63 28.96
 1 -10 -2 405.43 18.11
 2 -10 -3 352.41 16.38
 3 -10 -4 112.29 6.89
 4 -10 -5 115.34 7.82
 -3 -11 2 77.42 5.03
 -2 -11 1 8.93 1.42
 -1 -11 0 116.74 4.11
 0 -11 -1 561.16 16.84
 1 -11 -2 896.39 39.28
 2 -11 -3 139.17 7.52
 3 -11 -4 92.55 5.98
 4 -11 -5 18.79 4.23
 -4 -12 3 2.66 3.02
 -3 -12 2 465.89 15.05
 -2 -12 1 45.81 2.44
 -1 -12 0 941.5 28.57
 0 -12 -1 1174.48 34.14
 1 -12 -2 894.1 37.76
 2 -12 -3 11.07 2.5
 3 -12 -4 353.86 16.47
 4 -12 -5 1.19 3.84
 -4 -13 3 66.9 5.61
 -3 -13 2 184.15 9.73
 -2 -13 1 83.3 3.51
 -1 -13 0 926.19 27.47
 0 -13 -1 13.49 1.29
 1 -13 -2 65.06 2.98
 2 -13 -3 17.46 2.74
 3 -13 -4 56.83 5.26
 4 -13 -5 5.19 3.98
 -4 -14 3 15.8 3.6
 -3 -14 2 142.38 8.36
 -2 -14 1 285.62 9.66
 -1 -14 0 12.63 1.81
 0 -14 -1 627.94 19.68
 1 -14 -2 120.27 4.49
 2 -14 -3 356.59 15.95
 3 -14 -4 214.7 11.16
 4 -14 -5 61.17 6.05
 -4 -15 3 48.38 5.07
 -3 -15 2 25.54 3.68
 -2 -15 1 38.06 2.43
 -1 -15 0 64.8 2.92
 0 -15 -1 428.39 13.2
 1 -15 -2 25.12 1.93
 2 -15 -3 458.73 21.25
 3 -15 -4 4.38 2.97
 4 -15 -5 11.17 4.2
 -4 -16 3 57.34 5.37
 -3 -16 2 35.62 4.15
 -2 -16 1 469.93 23
 -1 -16 0 18.78 1.69
 0 -16 -1 1454.23 44.32
 1 -16 -2 11.9 1.65
 2 -16 -3 364.82 16.79
 3 -16 -4 57.61 4.99
 -4 -17 3 13.04 3.8
 -3 -17 2 249.7 13.02
 -2 -17 1 83.66 5.83
 -1 -17 0 255.3 8.31
 0 -17 -1 130.24 4.88
 1 -17 -2 1.9 1.42
 2 -17 -3 121.74 7.29
 3 -17 -4 1.97 3.13
 -4 -18 3 38.96 5
 -3 -18 2 100.86 7
 -2 -18 1 32.67 3.78
 -1 -18 0 238.96 8.13
 0 -18 -1 46.82 2.62
 1 -18 -2 168.96 6.27
 2 -18 -3 72.71 5.3
 3 -18 -4 233.11 12.37
 -4 -19 3 2.61 3.71
 -3 -19 2 81.04 6.5
 -2 -19 1 39.22 4.31
 -1 -19 0 141.07 5.33
 0 -19 -1 3.31 1.43
 1 -19 -2 236.38 8.4
 2 -19 -3 63.61 4.9
 3 -19 -4 43.76 5.05
 -3 -20 2 41.62 4.83
 -2 -20 1 103.62 7.08
 -1 -20 0 589.33 26.74
 0 -20 -1 240.92 8.11
 1 -20 -2 293.01 9.87
 2 -20 -3 104.1 7.01
 3 -20 -4 48.13 5.09
 -3 -21 2 4.02 3.53
 -2 -21 1 324.35 16.53
 -1 -21 0 41.31 4.25
 0 -21 -1 57.33 2.99
 1 -21 -2 168.11 6.44
 2 -21 -3 5.08 2.89
 3 -21 -4 28.34 4.47
 -3 -22 2 0.15 3.49
 -2 -22 1 94.2 6.99
 -1 -22 0 9.31 3.08
 0 -22 -1 57.02 3.01
 1 -22 -2 0.25 1.78
 2 -22 -3 177.89 9.73
 3 -22 -4 0.78 3.56
 -3 -23 2 10.09 3.97
 -2 -23 1 159.9 9.69
 -1 -23 0 11.96 3.3
 0 -23 -1 51.22 4.62
 1 -23 -2 89.74 4.29
 2 -23 -3 5.91 3.13
 3 -23 -4 11.69 4.03
 -3 -24 2 9.1 4.2
 -2 -24 1 46.61 5.06
 -1 -24 0 487.4 23.28
 0 -24 -1 5.71 2.91
 1 -24 -2 403.58 13.39
 2 -24 -3 10.01 3.38
 3 -24 -4 28.71 4.94
 -3 -25 2 56.33 6.07
 -2 -25 1 103.13 7.5
 -1 -25 0 106.66 7.22
 0 -25 -1 6.1 2.85
 1 -25 -2 55.21 3.51
 2 -25 -3 29.57 4.26
 -3 -26 2 48.38 5.98
 -2 -26 1 26.7 4.56
 -1 -26 0 55.36 5.14
 0 -26 -1 7.61 2.91
 1 -26 -2 80.95 4.35
 2 -26 -3 36.36 4.74
 -3 -27 2 64.76 6.76
 -2 -27 1 125.59 8.99
 -1 -27 0 22.07 3.94
 0 -27 -1 106.51 7.26
 1 -27 -2 0.5 3.32
 2 -27 -3 3.27 3.18
 -2 -28 1 83.86 7.19
 -1 -28 0 49.99 5.16
 0 -28 -1 444.14 21.27
 1 -28 -2 107.86 7.35
 2 -28 -3 86.21 6.68
 -2 -29 1 18.22 4.59
 -1 -29 0 49.6 5.3
 0 -29 -1 68 5.73
 1 -29 -2 13.13 3.87
 2 -29 -3 49.6 5.6
 -1 -30 0 40.76 5.02
 0 -30 -1 57.35 5.53
 1 -30 -2 121.71 8.29
 2 -30 -3 45.78 5.46
 -2 -31 1 -2.37 3.82
 -1 -31 0 226.96 12.64
 0 -31 -1 22.79 4.26
 1 -31 -2 7.37 3.99
 2 -31 -3 1.33 3.96
 -2 -32 1 23.71 5.19
 -1 -32 0 96.9 7.57
 0 -32 -1 200.16 11.49
 1 -32 -2 72.26 6.49
 -1 -33 0 2.13 3.8
 0 -33 -1 71.86 6.71
 1 -33 -2 26.64 4.82
 -1 -34 0 29.16 5.05
 0 -34 -1 167.55 10.44
 1 -34 -2 6.26 4.1
 0 -35 -1 31.28 5.1
 -1 34 -1 6.09 4.34
 -1 33 -1 119.01 8.27
 0 33 -2 14.23 3.62
 1 33 -3 32.99 4.9
 -2 32 0 28.76 5.47
 -1 32 -1 -0.08 3.75
 0 32 -2 60.31 5.3
 1 32 -3 1.39 3.66
 -2 31 0 60.37 6.72
 -1 31 -1 2.62 3.68
 0 31 -2 157.79 8.99
 1 31 -3 -1.71 3.3
 -2 30 0 13.07 4.59
 -1 30 -1 0.74 3.57
 0 30 -2 71.09 5.69
 1 30 -3 6.88 3.55
 2 30 -4 5.25 4.25
 -2 29 0 60.2 6.56
 -1 29 -1 144.71 9.24
 0 29 -2 48.62 4.74
 1 29 -3 7.77 3.5
 2 29 -4 43.74 5.48
 -3 28 1 22.3 6.05
 -2 28 0 2.25 4.37
 -1 28 -1 36.59 4.82
 0 28 -2 21.6 3.81
 1 28 -3 22.34 3.86
 2 28 -4 30.95 4.91
 -2 27 0 5.67 4.67
 -1 27 -1 151 9.48
 0 27 -2 72.48 5.54
 1 27 -3 134.3 8.01
 2 27 -4 78.4 6.4
 -3 26 1 8.49 4.88
 -2 26 0 15.94 4.74
 -1 26 -1 102.14 7.31
 0 26 -2 73.97 5.46
 1 26 -3 23.52 3.76
 2 26 -4 10.27 3.94
 -3 25 1 1.79 4.57
 -2 25 0 354.88 18.01
 -1 25 -1 -0.7 2.19
 0 25 -2 161.15 5.88
 1 25 -3 86.77 6.22
 2 25 -4 92.91 7.02
 -3 24 1 1.33 4.58
 -2 24 0 11.97 4.11
 -1 24 -1 3.41 2.22
 0 24 -2 5.19 2.03
 1 24 -3 1.71 2.96
 2 24 -4 38.01 4.78
 3 24 -5 3.78 4.13
 -3 23 1 39.89 5.74
 -2 23 0 153.02 9.55
 -1 23 -1 145.57 5.68
 0 23 -2 55.39 3.16
 1 23 -3 333.32 15.74
 2 23 -4 31.61 4.33
 3 23 -5 90.96 7.3
 -3 22 1 1.35 3.93
 -2 22 0 42.76 4.9
 -1 22 -1 241.5 8.23
 0 22 -2 3.61 1.92
 1 22 -3 87.39 6.16
 2 22 -4 5.13 3.29
 3 22 -5 17.33 4.54
 -3 21 1 166.75 10.31
 -2 21 0 73.68 6.09
 -1 21 -1 336.38 10.84
 0 21 -2 8.17 2.03
 1 21 -3 383.32 17.18
 2 21 -4 1.2 3.16
 3 21 -5 87.05 7.14
 -4 20 2 14.11 5.06
 -3 20 1 15.42 4.16
 -2 20 0 13.21 3.62
 -1 20 -1 6.2 1.92
 0 20 -2 45.92 2.79
 1 20 -3 2.47 2.66
 2 20 -4 50.39 4.74
 3 20 -5 18.7 4.34
 -4 19 2 85.1 7.74
 -3 19 1 59.67 5.8
 -2 19 0 394.14 18.42
 -1 19 -1 27.21 2.28
 0 19 -2 420.71 12.5
 1 19 -3 14.91 3.01
 2 19 -4 291.09 13.85
 3 19 -5 -0.11 2.56
 -4 18 2 5.06 4.63
 -3 18 1 1.44 3.58
 -2 18 0 46.09 4.64
 -1 18 -1 19.08 1.99
 0 18 -2 303.18 9.66
 1 18 -3 25.05 3.5
 2 18 -4 74.52 5.63
 3 18 -5 1.08 2.5
 -4 17 2 40.01 5.89
 -3 17 1 136.33 8.68
 -2 17 0 86.01 5.86
 -1 17 -1 136.45 4.91
 0 17 -2 365.95 11.12
 1 17 -3 379.85 17.13
 2 17 -4 371.35 12.14
 3 17 -5 27.81 3.09
 -4 16 2 -1.36 4.23
 -3 16 1 26.87 4.16
 -2 16 0 7.86 2.79
 -1 16 -1 1.1 1.43
 0 16 -2 26.88 2.24
 1 16 -3 2.27 2.42
 2 16 -4 13.48 2.27
 3 16 -5 72.29 4.22
 -4 15 2 24.24 5.04
 -3 15 1 399.36 18.71
 -2 15 0 4.07 1.41
 -1 15 -1 1080.25 30.18
 0 15 -2 98.17 3.81
 1 15 -3 204.58 9.71
 2 15 -4 85.97 4.09
 3 15 -5 120.94 5.53
 -4 14 2 30.21 5.11
 -3 14 1 2.07 3.08
 -2 14 0 68.34 2.94
 -1 14 -1 45.62 2.2
 0 14 -2 125.94 4.56
 1 14 -3 70.55 3.27
 2 14 -4 138 5.51
 3 14 -5 72.76 4.11
 -4 13 2 60.31 6.06
 -3 13 1 4.33 3
 -2 13 0 210.62 6.64
 -1 13 -1 9.45 1.26
 0 13 -2 887.94 24.93
 1 13 -3 136.92 4.99
 2 13 -4 624.82 19.06
 3 13 -5 102.92 4.95
 -4 12 2 22.86 4.47
 -3 12 1 35.83 4.07
 -2 12 0 24.13 1.78
 -1 12 -1 39.08 1.98
 0 12 -2 128.52 4.26
 1 12 -3 1.5 1.54
 2 12 -4 14.48 2.12
 3 12 -5 66.83 3.88
 4 12 -6 47.37 5.6
 -4 11 2 92.94 7.13
 -3 11 1 445.62 20.13
 -2 11 0 877.63 24.13
 -1 11 -1 360.1 10.56
 0 11 -2 506.94 14.11
 1 11 -3 357.11 10.85
 2 11 -4 77.24 3.7
 3 11 -5 45.26 3.21
 4 11 -6 26.63 4.61
 -4 10 2 42.34 4.94
 -3 10 1 8.07 2.86
 -2 10 0 5.93 1.23
 -1 10 -1 132.25 4.3
 0 10 -2 148.4 4.65
 1 10 -3 338.36 10.2
 2 10 -4 17.33 1.96
 3 10 -5 114.66 5.03
 4 10 -6 20.12 4.42
 -4 9 2 4.5 3.53
 -3 9 1 102.81 6.15
 -2 9 0 23.61 1.57
 -1 9 -1 822.28 22.2
 0 9 -2 93.71 3.17
 1 9 -3 1169.22 32.95
 2 9 -4 24 2.1
 3 9 -5 376.13 12.34
 4 9 -6 4.57 3.76
 -4 8 2 6.53 3.62
 -3 8 1 4.9 2.59
 -2 8 0 208.96 6.4
 -1 8 -1 389.69 11.14
 0 8 -2 3.64 0.61
 1 8 -3 223.35 7.18
 2 8 -4 128.46 4.86
 3 8 -5 6.28 2.17
 4 8 -6 35.92 5.2
 -4 7 2 277.05 13.92
 -3 7 1 23.96 3.14
 -2 7 0 2141.44 58.08
 -1 7 -1 173.13 5.09
 0 7 -2 1448.75 31.53
 1 7 -3 221.17 6.92
 2 7 -4 157.76 5.61
 3 7 -5 9.24 2.12
 4 7 -6 43.45 5.27
 -4 6 2 30.81 4.38
 -3 6 1 29.37 3.35
 -2 6 0 25.99 1.52
 -1 6 -1 317.75 12.03
 0 6 -2 149.47 4.62
 1 6 -3 99.55 3.66
 2 6 -4 220.22 7.21
 3 6 -5 3.54 1.98
 4 6 -6 79.74 6.79
 -4 5 2 162.45 9.18
 -3 5 1 101.25 3.71
 -2 5 0 243.28 7.22
 -1 5 -1 98.16 4.17
 0 5 -2 1473.06 40.44
 1 5 -3 1250.18 48.58
 2 5 -4 409.76 12.27
 3 5 -5 93.43 4.06
 4 5 -6 109.89 8.01
 -3 4 1 60.68 2.82
 -2 4 0 41.56 2.44
 -1 4 -1 983.36 38.31
 0 4 -2 351.83 9.64
 1 4 -3 830 23.32
 2 4 -4 51.4 2.74
 3 4 -5 64.6 5.17
 4 4 -6 -0.05 3.69
 -4 3 2 2.66 3.11
 -3 3 1 722.31 20.82
 -2 3 0 297.75 11.99
 -1 3 -1 4188.5 164.78
 0 3 -2 4.17 0.57
 1 3 -3 815.79 24.08
 2 3 -4 11.1 1.82
 3 3 -5 140.82 8.21
 4 3 -6 3.35 3.85
 -4 2 2 0.8 3.1
 -3 2 1 88.57 3.4
 -2 2 0 15.06 1.5
 -1 2 -1 378.42 13.84
 0 2 -2 27.56 1.13
 1 2 -3 174.33 5.37
 2 2 -4 142.24 4.78
 3 2 -5 107.36 6.74
 4 2 -6 19.03 4.2
 -4 1 2 248.27 11.98
 -3 1 1 293.48 13.01
 -1 1 -1 470.21 18.24
 0 1 -2 3719.09 101.42
 1 1 -3 253.22 7.65
 2 1 -4 514.28 14.9
 3 1 -5 27.62 3.64
 4 1 -6 66.14 6.21
 -1 0 -1 -0.31 0.5
 0 0 -2 5233.06 146.08
 1 0 -3 1.87 1.45
 2 0 -4 318.88 9.77
 3 0 -5 1.15 2.71
 4 0 -6 32.39 4.59
 -1 -1 -1 441.38 19.81
 0 -1 -2 3639.34 101.33
 1 -1 -3 250.13 7.58
 2 -1 -4 517.95 14.79
 3 -1 -5 28.19 3.67
 4 -1 -6 80.56 6.49
 -4 -2 2 12.29 3.31
 -1 -2 -1 343.81 15.07
 0 -2 -2 28.78 1.12
 1 -2 -3 158.94 5.19
 2 -2 -4 129.71 4.51
 3 -2 -5 107.42 6.65
 4 -2 -6 14.77 4.21
 -4 -3 2 5.23 3.05
 -1 -3 -1 4228.87 180.16
 0 -3 -2 4.16 0.57
 1 -3 -3 839.86 23.89
 2 -3 -4 10.02 1.21
 3 -3 -5 144.49 8.23
 4 -3 -6 4.55 3.87
 -4 -4 2 1.38 2.96
 -1 -4 -1 1003.14 42
 0 -4 -2 311.56 9.56
 1 -4 -3 807.36 23.03
 2 -4 -4 62.01 2.35
 3 -4 -5 61.67 5.07
 4 -4 -6 10.28 3.84
 -4 -5 2 158.34 9.09
 -3 -5 1 106.44 5.69
 -1 -5 -1 91.26 4.72
 0 -5 -2 1410.82 40.38
 1 -5 -3 1254.88 35.37
 2 -5 -4 401.98 18.11
 3 -5 -5 89.25 6.22
 4 -5 -6 122.71 8.09
 -4 -6 2 21.82 3.72
 -3 -6 1 33.26 3.12
 -2 -6 0 21.95 2.29
 -1 -6 -1 293.63 9.22
 0 -6 -2 127.76 6.89
 1 -6 -3 92.31 5.11
 2 -6 -4 204.93 10.53
 3 -6 -5 2.4 2.89
 4 -6 -6 82.3 6.76
 -3 -7 1 27.79 2.87
 -2 -7 0 2124.3 62.5
 -1 -7 -1 172.44 5.35
 0 -7 -2 1217.71 57.4
 1 -7 -3 217.58 9.99
 2 -7 -4 157.33 8.13
 3 -7 -5 6.33 2.96
 4 -7 -6 49.19 5.41
 -3 -8 1 6.48 2.28
 -2 -8 0 212.68 6.84
 -1 -8 -1 361.29 17.2
 0 -8 -2 4.7 1.36
 1 -8 -3 215.62 10.36
 2 -8 -4 127.79 7.08
 4 -8 -6 42.33 5.21
 -4 -9 2 6.26 2.9
 -3 -9 1 96.4 4.08
 -2 -9 0 20.59 1.55
 -1 -9 -1 722.18 33.98
 0 -9 -2 95.56 5.02
 1 -9 -3 1132.16 48.5
 2 -9 -4 25.68 3.09
 3 -9 -5 386.96 18.19
 4 -9 -6 9.72 4.26
 -4 -10 2 36.3 4.17
 -3 -10 1 7.93 1.73
 -2 -10 0 6.17 1.29
 -1 -10 -1 123.69 6.84
 0 -10 -2 135.71 7.16
 1 -10 -3 323.83 14.79
 2 -10 -4 16.36 2.73
 3 -10 -5 114.95 7.41
 4 -10 -6 25.27 4.83
 -4 -11 2 90.87 6.58
 -3 -11 1 459.39 20.89
 -2 -11 0 867.41 26.04
 -1 -11 -1 357.64 11.24
 0 -11 -2 460.84 21.51
 1 -11 -3 343.21 15.75
 2 -11 -4 79.48 5.33
 3 -11 -5 41.5 4.58
 4 -11 -6 27.03 4.84
 -4 -12 2 25.14 3.98
 -3 -12 1 29.43 3.62
 -2 -12 0 25.54 1.91
 -1 -12 -1 41.79 1.92
 0 -12 -2 133.14 6.65
 1 -12 -3 2.53 1.83
 2 -12 -4 18.88 3.02
 3 -12 -5 71.86 5.6
 4 -12 -6 40.76 5.46
 -4 -13 2 64.67 5.5
 -3 -13 1 0.44 2.47
 -2 -13 0 217.42 7.05
 -1 -13 -1 8.59 1.11
 0 -13 -2 896.75 26.65
 1 -13 -3 132.44 7.1
 2 -13 -4 635.42 27.93
 3 -13 -5 107.08 7.2
 -4 -14 2 23.31 4.12
 -3 -14 1 0.73 2.9
 -2 -14 0 72.53 5
 -1 -14 -1 37.92 2.01
 0 -14 -2 132.54 4.64
 1 -14 -3 71.37 4.65
 2 -14 -4 139.88 7.92
 3 -14 -5 68.4 5.73
 -4 -15 2 21.54 4.13
 -3 -15 1 417.35 19.33
 -2 -15 0 4.56 2.45
 -1 -15 -1 1082.42 32.31
 0 -15 -2 97.5 3.74
 1 -15 -3 199.25 9.93
 2 -15 -4 86.14 5.88
 3 -15 -5 123.49 7.86
 -4 -16 2 1.98 3.4
 -3 -16 1 32.65 4.19
 -2 -16 0 9.42 2.78
 -1 -16 -1 9.72 2.57
 0 -16 -2 27.41 1.84
 1 -16 -3 2.24 2.13
 2 -16 -4 13.84 3.02
 3 -16 -5 60.85 5.58
 -4 -17 2 37.06 4.96
 -3 -17 1 149.81 8.82
 -2 -17 0 94.21 6.09
 -1 -17 -1 132.12 7.66
 0 -17 -2 359.09 11.65
 1 -17 -3 392.55 18.12
 2 -17 -4 371.11 17.51
 3 -17 -5 27.34 4.1
 -4 -18 2 7.63 3.88
 -3 -18 1 6.05 3.24
 -2 -18 0 51.17 4.7
 -1 -18 -1 21.25 3.19
 0 -18 -2 302.29 10.07
 1 -18 -3 23.03 3.37
 2 -18 -4 74.13 5.6
 3 -18 -5 5.18 3.53
 -4 -19 2 91.79 7.43
 -3 -19 1 60.88 5.53
 -2 -19 0 396.09 19.13
 -1 -19 -1 36.15 3.86
 0 -19 -2 418.99 13.14
 1 -19 -3 12.44 2.84
 2 -19 -4 290.4 14.37
 3 -19 -5 1.83 3.51
 -4 -20 2 8.53 4.14
 -3 -20 1 12.12 3.77
 -2 -20 0 10.28 3.24
 -1 -20 -1 9.38 2.94
 0 -20 -2 48.01 2.65
 1 -20 -3 1.84 2.85
 2 -20 -4 35.27 4.27
 3 -20 -5 11.08 3.97
 -3 -21 1 163.01 10.14
 -2 -21 0 87 6.24
 -1 -21 -1 352.71 16.71
 0 -21 -2 11.28 2.97
 1 -21 -3 383.82 18.25
 2 -21 -4 3.78 2.93
 3 -21 -5 89.31 7.1
 -3 -22 1 4.96 3.73
 -2 -22 0 42.21 4.65
 -1 -22 -1 244 12.59
 0 -22 -2 2.98 2.75
 1 -22 -3 89.24 6.53
 2 -22 -4 8.68 3.15
 3 -22 -5 15.38 4.18
 -3 -23 1 42.4 5.4
 -2 -23 0 151.36 9.58
 -1 -23 -1 146.57 8.61
 0 -23 -2 45.31 4.61
 1 -23 -3 333.14 16.86
 2 -23 -4 25.92 3.94
 3 -23 -5 93.3 7.39
 -3 -24 1 5.11 3.93
 -2 -24 0 16.95 3.93
 -1 -24 -1 5.1 3.19
 0 -24 -2 3.68 3.1
 1 -24 -3 2.29 3.1
 2 -24 -4 32.19 4.38
 3 -24 -5 -0.14 4
 -3 -25 1 7.89 4.29
 -2 -25 0 376.44 18.58
 -1 -25 -1 5.75 3.06
 0 -25 -2 152.56 9.06
 1 -25 -3 94.73 6.84
 2 -25 -4 86.18 6.85
 -3 -26 1 5.78 4.32
 -2 -26 0 16.23 4.06
 -1 -26 -1 120.1 7.79
 0 -26 -2 78.8 6.21
 1 -26 -3 17.86 3.92
 2 -26 -4 7.42 3.57
 -3 -27 1 53.39 6.6
 -2 -27 0 10.45 3.8
 -1 -27 -1 160.96 9.83
 0 -27 -2 73.56 6.09
 1 -27 -3 131.52 8.59
 2 -27 -4 71.49 6.15
 -3 -28 1 18.01 4.8
 -2 -28 0 -1.33 3.6
 -1 -28 -1 44.71 5.07
 0 -28 -2 22.43 4.3
 1 -28 -3 16.34 4.15
 2 -28 -4 23.69 4.43
 -2 -29 0 64.7 6.35
 -1 -29 -1 154.13 9.71
 0 -29 -2 51.64 5.47
 1 -29 -3 10.33 4.13
 2 -29 -4 39.36 5.32
 -2 -30 0 17.76 4.53
 -1 -30 -1 6.68 3.6
 0 -30 -2 70.58 6.34
 1 -30 -3 4.16 3.84
 2 -30 -4 -0.25 3.73
 -2 -31 0 54.84 6.26
 -1 -31 -1 -0.96 3.6
 0 -31 -2 153.55 9.83
 1 -31 -3 -4.17 3.96
 -2 -32 0 30.89 5.11
 -1 -32 -1 4.78 3.84
 0 -32 -2 62.24 6.07
 1 -32 -3 6.92 4.33
 -1 -33 -1 121.8 8.62
 0 -33 -2 15.99 4.5
 1 -33 -3 30.07 5.29
 -1 -34 -1 8.84 4.19
 0 -34 -2 3.45 4.15
 0 -35 -2 47.82 5.92
 0 34 -3 2.38 3.71
 0 33 -3 62.3 5.72
 -2 32 -1 14.49 5.19
 0 32 -3 2.52 3.52
 1 32 -4 33.73 4.91
 -2 31 -1 10.12 5.25
 -1 31 -2 187.11 10.72
 0 31 -3 -1.07 3.46
 1 31 -4 41.68 5.05
 -2 30 -1 1.72 4.96
 -1 30 -2 44.83 5.28
 0 30 -3 14.56 3.72
 1 30 -4 9.12 3.85
 -2 29 -1 68.28 7.09
 -1 29 -2 18.53 4.1
 0 29 -3 192.39 10.32
 1 29 -4 59.01 5.49
 2 29 -5 169.34 10.45
 -3 28 0 -1.75 4.86
 -2 28 -1 16.05 4.88
 -1 28 -2 27.97 4.53
 0 28 -3 1.55 3.45
 1 28 -4 20.77 3.92
 2 28 -5 1.44 4.08
 -3 27 0 80.12 8.09
 -2 27 -1 196.89 11.84
 -1 27 -2 154.6 6.05
 0 27 -3 216.41 11.39
 1 27 -4 48.57 5.05
 2 27 -5 42.47 5.19
 -3 26 0 16.4 5.15
 -2 26 -1 23.07 4.98
 -1 26 -2 17.96 2.91
 0 26 -3 91.66 6.39
 1 26 -4 7.03 3.49
 2 26 -5 10.5 4.02
 -3 25 0 82.91 7.54
 -2 25 -1 33.25 4.93
 -1 25 -2 460.26 14.24
 0 25 -3 2.14 3.13
 1 25 -4 349.23 17.13
 2 25 -5 -0.6 3.55
 -3 24 0 40.71 5.68
 -2 24 -1 16.66 4.13
 -1 24 -2 3.14 2.3
 0 24 -3 34.38 4.29
 1 24 -4 13.55 3.57
 2 24 -5 5.45 3.69
 -3 23 0 28.18 5.01
 -2 23 -1 323 15.79
 -1 23 -2 151.4 5.91
 0 23 -3 442.4 19.45
 1 23 -4 157.08 8.8
 2 23 -5 65.17 5.74
 -3 22 0 -0.77 3.92
 -2 22 -1 170.92 9.94
 -1 22 -2 16.13 2.39
 0 22 -3 15.05 3.62
 1 22 -4 18.96 3.57
 2 22 -5 3.22 3.31
 3 22 -6 -1.13 4.17
 -4 21 1 89.55 8.14
 -3 21 0 8.79 4.19
 -2 21 -1 454.98 20.86
 -1 21 -2 -0.1 1.94
 0 21 -3 869.68 25.3
 1 21 -4 120.54 7.57
 2 21 -5 155.97 9.26
 3 21 -6 18.54 4.65
 -4 20 1 10.61 4.81
 -3 20 0 23.32 4.63
 -2 20 -1 37.99 4.47
 -1 20 -2 26.41 2.6
 0 20 -3 8.65 1.97
 1 20 -4 3.71 3.15
 2 20 -5 3.23 3.33
 3 20 -6 7.51 2.97
 -4 19 1 3.46 4.37
 -3 19 0 104.97 7.5
 -2 19 -1 -2.58 2.67
 -1 19 -2 1015.41 28.84
 0 19 -3 80.32 3.63
 1 19 -4 396.46 18.42
 2 19 -5 61.61 3.87
 3 19 -6 155.28 6.83
 -4 18 1 6.21 4.45
 -3 18 0 47.8 5.07
 -2 18 -1 9.59 1.84
 -1 18 -2 249.96 8.23
 0 18 -3 22.81 2.21
 1 18 -4 20.56 3.46
 2 18 -5 1.3 2.12
 3 18 -6 4.79 2.79
 -4 17 1 25.33 5.02
 -3 17 0 277.62 13.68
 -2 17 -1 41.1 2.52
 -1 17 -2 910.13 25.88
 0 17 -3 457.58 13.33
 1 17 -4 254.67 12.43
 2 17 -5 92.71 4.5
 3 17 -6 65.82 4.35
 -4 16 1 19.8 4.56
 -3 16 0 8.92 3.47
 -2 16 -1 132.02 4.75
 -1 16 -2 58.66 2.77
 0 16 -3 5.49 1.65
 1 16 -4 8.88 1.82
 2 16 -5 20.71 2.57
 3 16 -6 2.85 2.59
 -4 15 1 65.42 6.28
 -3 15 0 33.14 4.13
 -2 15 -1 205.56 6.6
 -1 15 -2 16.23 1.6
 0 15 -3 1389.18 38.61
 1 15 -4 -0.16 1.57
 2 15 -5 375.92 12.3
 3 15 -6 5.4 2.52
 -4 14 1 27.7 4.74
 -3 14 0 0.44 3.04
 -2 14 -1 77.23 3.22
 -1 14 -2 295.28 8.94
 0 14 -3 0.18 1.26
 1 14 -4 1.14 1.6
 2 14 -5 34.81 2.77
 3 14 -6 5.68 2.52
 -4 13 1 31.74 4.65
 -3 13 0 212.9 10.89
 -2 13 -1 234.67 7.43
 -1 13 -2 830.98 22.71
 0 13 -3 219.5 6.89
 1 13 -4 255.79 8.28
 2 13 -5 72.57 3.76
 3 13 -6 121.46 5.52
 -4 12 1 7.2 3.69
 -3 12 0 44.69 4.29
 -2 12 -1 89.03 3.37
 -1 12 -2 170.98 5.46
 0 12 -3 85.52 3.17
 1 12 -4 33.51 2.3
 2 12 -5 15.42 2.19
 3 12 -6 3.69 2.35
 -4 11 1 115.56 7.57
 -3 11 0 54.81 4.45
 -2 11 -1 70.71 2.93
 -1 11 -2 426.1 12.45
 0 11 -3 374.34 10.81
 1 11 -4 975.6 28.29
 2 11 -5 306.24 10.01
 3 11 -6 61.73 3.76
 -4 10 1 24.5 4.15
 -3 10 0 48.27 4.26
 -2 10 -1 75.58 3.04
 -1 10 -2 54.13 2.22
 0 10 -3 87.05 2.51
 1 10 -4 56.25 2.77
 2 10 -5 7.08 1.89
 3 10 -6 3.91 2.3
 -4 9 1 160.98 9.45
 -3 9 0 82.73 5.28
 -2 9 -1 977.6 27.23
 -1 9 -2 9.67 1.06
 0 9 -3 371.03 8.73
 1 9 -4 14.32 1.65
 2 9 -5 277.39 9.28
 3 9 -6 1.07 2.28
 -4 8 1 7.24 3.35
 -3 8 0 4.94 2.49
 -2 8 -1 171.74 5.65
 -1 8 -2 99.87 4.89
 0 8 -3 728.35 20.63
 1 8 -4 95.48 3.62
 2 8 -5 3.55 1.79
 3 8 -6 13.64 2.51
 -4 7 1 7.87 3.6
 -3 7 0 263.65 8.3
 -2 7 -1 114.08 5.12
 -1 7 -2 503.2 18.89
 0 7 -3 203.19 6.15
 1 7 -4 1748.46 49.23
 2 7 -5 32.73 2.4
 3 7 -6 217.23 11.61
 -4 6 1 0.56 2.97
 -3 6 0 116.05 4.36
 -2 6 -1 4.02 1.51
 -1 6 -2 160.09 6.51
 0 6 -3 425.79 12.33
 1 6 -4 25.44 1.87
 2 6 -5 0.34 1.53
 3 6 -6 13.04 3.52
 4 6 -7 5.26 4.08
 -4 5 1 220.36 11.28
 -3 5 0 297.69 9.39
 -2 5 -1 1009.14 39.46
 -1 5 -2 466.94 18.9
 0 5 -3 6.17 0.82
 1 5 -4 669.3 18.86
 2 5 -5 72.5 3.34
 3 5 -6 238.62 12.61
 4 5 -7 35.3 5.31
 -4 4 1 23.77 3.78
 -3 4 0 15.11 2.26
 -2 4 -1 -0.56 1.43
 -1 4 -2 784.47 28.82
 0 4 -3 546.59 15.89
 1 4 -4 57.98 2.66
 2 4 -5 26.36 3.23
 3 4 -6 25.49 3.97
 4 4 -7 7.8 4.39
 -4 3 1 199.54 10.59
 -3 3 0 15.46 2.11
 -2 3 -1 1281.64 48.87
 -1 3 -2 31.08 2
 0 3 -3 1507.63 40.82
 1 3 -4 500.24 15.05
 2 3 -5 839.52 24.2
 3 3 -6 14.43 3.46
 4 3 -7 90.86 7.11
 -4 2 1 125.3 7.21
 -3 2 0 6.29 2.02
 -2 2 -1 55.48 2.99
 -1 2 -2 80.81 2.53
 0 2 -3 162.39 4.95
 1 2 -4 144.33 5.08
 2 2 -5 131.77 5.45
 3 2 -6 14.95 3.44
 4 2 -7 4.85 4.04
 -4 1 1 22.28 3.64
 -3 1 0 1069.87 41.91
 -2 1 -1 20.35 1.82
 -1 1 -2 1185.8 33.88
 0 1 -3 922.74 25.29
 1 1 -4 314.73 9.57
 2 1 -5 576.33 16.84
 3 1 -6 234.86 12.1
 4 1 -7 19.86 4.57
 -4 0 1 2.14 2.88
 -3 0 0 54.51 3.63
 -2 0 -1 -0.59 1.22
 -1 0 -2 300.85 10.7
 0 0 -3 -2.08 0.64
 1 0 -4 408.34 12.12
 3 0 -6 20.22 3.71
 4 0 -7 0.36 3.82
 -4 -1 1 25.87 3.54
 -1 -1 -2 1200.95 33.63
 0 -1 -3 898.94 25.28
 1 -1 -4 319.92 9.52
 2 -1 -5 577.62 16.74
 3 -1 -6 229.08 12.02
 4 -1 -7 20.79 4.7
 -4 -2 1 123.76 7.05
 -2 -2 -1 46.78 3.03
 -1 -2 -2 81.41 2.7
 0 -2 -3 161.55 4.93
 1 -2 -4 160.51 5.05
 2 -2 -5 142.67 4.97
 3 -2 -6 7.48 3.19
 4 -2 -7 13.8 4.42
 -2 -3 -1 1119.13 53.27
 -1 -3 -2 31.23 1.46
 0 -3 -3 1463.85 40.78
 1 -3 -4 498.24 14.85
 2 -3 -5 855.4 35.86
 3 -3 -6 18.31 3.45
 4 -3 -7 69.84 6.72
 -4 -4 1 21.89 3.44
 -1 -4 -2 707.14 31.52
 0 -4 -3 546.72 15.86
 1 -4 -4 60.6 2.45
 2 -4 -5 19.35 3.02
 3 -4 -6 40.1 4.48
 4 -4 -7 2.34 4.12
 -3 -5 0 307.16 14.34
 -2 -5 -1 929.36 43.21
 -1 -5 -2 474.18 20.84
 0 -5 -3 6 0.79
 1 -5 -4 613.9 18.5
 2 -5 -5 66.76 4.77
 3 -5 -6 261.79 12.87
 4 -5 -7 35.96 5.21
 -4 -6 1 11.64 2.92
 -3 -6 0 123.44 6.82
 -2 -6 -1 13.02 2
 -1 -6 -2 136.76 7.2
 0 -6 -3 420.32 12.26
 1 -6 -4 30.32 1.6
 2 -6 -5 2.74 2.37
 3 -6 -6 20.28 3.75
 4 -6 -7 2.55 3.87
 -4 -7 1 11.44 3.14
 -3 -7 0 271.14 8.93
 -2 -7 -1 99.14 5.75
 -1 -7 -2 491.51 20.93
 0 -7 -3 198.65 6.58
 1 -7 -4 1773.4 48.83
 2 -7 -5 33.72 3.41
 3 -7 -6 221.58 11.65
 -4 -8 1 5.03 3.02
 -3 -8 0 4.65 1.55
 -2 -8 -1 183.29 5.98
 -1 -8 -2 99.23 5.67
 0 -8 -3 721.05 20.54
 1 -8 -4 84.62 2.98
 2 -8 -5 9.43 2.76
 3 -8 -6 8.19 3.33
 -4 -9 1 173.56 9.5
 -3 -9 0 74.88 5.13
 -2 -9 -1 969.43 31.16
 -1 -9 -2 14.25 2.11
 0 -9 -3 350.09 16.19
 1 -9 -4 17.37 2.41
 2 -9 -5 301.71 13.7
 3 -9 -6 2.32 3.17
 -4 -10 1 34.9 4.16
 -3 -10 0 46.22 4.13
 -2 -10 -1 76.27 3.06
 -1 -10 -2 53.82 3.79
 0 -10 -3 87.2 4.95
 1 -10 -4 61.11 4.06
 2 -10 -5 8.06 2.96
 3 -10 -6 4.77 3.39
 -4 -11 1 101.96 7.08
 -3 -11 0 56.64 4.66
 -2 -11 -1 70.13 2.9
 -1 -11 -2 434.26 19.42
 0 -11 -3 366.74 16.71
 1 -11 -4 997.61 41.69
 2 -11 -5 298.43 14.48
 3 -11 -6 64.79 5.61
 -4 -12 1 8.71 3.28
 -3 -12 0 42.94 4.24
 -2 -12 -1 79.27 5.44
 -1 -12 -2 165.42 8.75
 0 -12 -3 86.38 5.09
 1 -12 -4 33.16 3.24
 2 -12 -5 20.03 3.38
 3 -12 -6 8.1 3.55
 -4 -13 1 28.33 4.24
 -3 -13 0 220.76 11.33
 -2 -13 -1 219.95 11.62
 -1 -13 -2 816.43 34.99
 0 -13 -3 210.99 10.69
 1 -13 -4 244.73 12
 2 -13 -5 72.74 5.38
 3 -13 -6 118.52 7.86
 -4 -14 1 28.88 4.42
 -3 -14 0 5.05 2.82
 -2 -14 -1 81.43 5.39
 -1 -14 -2 288.9 14.07
 0 -14 -3 6.12 2.23
 1 -14 -4 4.99 2.33
 2 -14 -5 36.44 4.03
 3 -14 -6 5.65 3.44
 -4 -15 1 66.56 6.07
 -3 -15 0 32.48 4.01
 -2 -15 -1 204.42 10.55
 -1 -15 -2 16.45 2.84
 0 -15 -3 1369.59 58.87
 1 -15 -4 -0.12 2.06
 2 -15 -5 397.94 18.12
 3 -15 -6 8.98 3.61
 -4 -16 1 21.44 4.24
 -3 -16 0 8.66 3.16
 -2 -16 -1 124.78 7.63
 -1 -16 -2 64.78 4.76
 0 -16 -3 13.62 2.73
 1 -16 -4 11.72 2.7
 2 -16 -5 19.88 3.75
 3 -16 -6 4.15 3.59
 -4 -17 1 28.4 4.81
 -3 -17 0 272.93 14.07
 -2 -17 -1 41.01 4.18
 -1 -17 -2 935.61 39.8
 0 -17 -3 463.66 20.45
 1 -17 -4 274.83 13.16
 2 -17 -5 94.4 6.55
 3 -17 -6 73.32 6.23
 -4 -18 1 0.61 3.76
 -3 -18 0 51.83 5.3
 -2 -18 -1 13.15 3.16
 -1 -18 -2 261.59 12.93
 0 -18 -3 23.25 3.22
 1 -18 -4 15.16 3.1
 2 -18 -5 5.2 3.13
 3 -18 -6 3.22 3.81
 -4 -19 1 0.18 3.89
 -3 -19 0 108.89 7.6
 -2 -19 -1 0.05 2.72
 -1 -19 -2 960.27 44.12
 0 -19 -3 71.72 5.47
 1 -19 -4 414.04 19.65
 2 -19 -5 76.52 5.65
 3 -19 -6 147.86 9.7
 -4 -20 1 19.11 4.64
 -3 -20 0 27.09 4.37
 -2 -20 -1 38.57 4.34
 -1 -20 -2 43.89 4.34
 0 -20 -3 8.84 2.89
 1 -20 -4 3.49 2.9
 2 -20 -5 2.31 3.2
 3 -20 -6 5 3.97
 -4 -21 1 85.7 7.6
 -3 -21 0 7.14 3.65
 -2 -21 -1 446.78 21.86
 -1 -21 -2 1.34 2.86
 0 -21 -3 837.67 38.57
 1 -21 -4 128.86 7.87
 2 -21 -5 166.94 9.65
 3 -21 -6 14.74 4.54
 -3 -22 0 1.54 3.7
 -2 -22 -1 177.85 10.26
 -1 -22 -2 17.88 3.61
 0 -22 -3 20.87 3.64
 1 -22 -4 15.58 3.51
 2 -22 -5 1.17 3.39
 3 -22 -6 5.65 4.1
 -3 -23 0 34.08 4.98
 -2 -23 -1 295.04 16.22
 -1 -23 -2 144.56 8.94
 0 -23 -3 436.37 21.04
 1 -23 -4 155.88 9.22
 2 -23 -5 57.38 5.72
 -3 -24 0 47.44 5.65
 -2 -24 -1 19.1 4.03
 -1 -24 -2 5.7 3.23
 0 -24 -3 52.33 4.97
 1 -24 -4 5.54 3.32
 2 -24 -5 -1.09 3.36
 -3 -25 0 85.11 7.4
 -2 -25 -1 32 4.58
 -1 -25 -2 446.84 21.62
 0 -25 -3 -0.3 2.99
 1 -25 -4 373.85 18.47
 2 -25 -5 -1.33 3.08
 -3 -26 0 15.95 4.56
 -2 -26 -1 21.34 4.27
 -1 -26 -2 36.66 4.51
 0 -26 -3 92.1 6.81
 1 -26 -4 4.23 3.74
 2 -26 -5 8.25 4.03
 -3 -27 0 84.82 7.64
 -2 -27 -1 194.75 11.92
 -1 -27 -2 125.29 8.72
 0 -27 -3 237.79 12.54
 1 -27 -4 43.85 5.28
 2 -27 -5 37.43 5.34
 -3 -28 0 0.86 4.23
 -2 -28 -1 21.41 4.39
 -1 -28 -2 35.03 4.82
 0 -28 -3 9.95 3.92
 1 -28 -4 25.33 4.5
 2 -28 -5 14.71 4.62
 -2 -29 -1 69.94 6.54
 -1 -29 -2 11.69 3.87
 0 -29 -3 198.34 11.37
 1 -29 -4 48.74 5.67
 2 -29 -5 177.8 11.15
 -2 -30 -1 6.88 3.86
 -1 -30 -2 38.96 4.99
 0 -30 -3 13.72 4.12
 1 -30 -4 9.46 4.33
 -2 -31 -1 8.28 4.19
 -1 -31 -2 181.89 11.17
 0 -31 -3 3.59 3.94
 1 -31 -4 40.4 5.43
 -2 -32 -1 19.32 4.65
 -1 -32 -2 17.05 4.28
 0 -32 -3 -0.61 4.22
 1 -32 -4 34.07 5.65
 -1 -33 -2 29.26 4.92
 0 -33 -3 71.01 6.79
 -1 -34 -2 17.96 4.56
 0 -34 -3 4.12 4.45
 0 33 -4 8.87 4.18
 0 32 -4 27.17 4.62
 -2 31 -2 7.17 5.21
 0 31 -4 108.46 7.66
 1 31 -5 3.19 3.75
 -2 30 -2 36.11 6.14
 0 30 -4 34.83 4.78
 1 30 -5 4.93 3.74
 -2 29 -2 92.08 7.99
 -1 29 -3 39.84 5.02
 0 29 -4 39.05 4.91
 1 29 -5 11.56 4.11
 -3 28 -1 55.65 7.08
 -2 28 -2 9.81 4.93
 -1 28 -3 189.03 10.07
 0 28 -4 33.85 4.65
 1 28 -5 43.4 5.28
 -3 27 -1 18.35 5.31
 -2 27 -2 39.45 5.45
 -1 27 -3 39.2 3.43
 0 27 -4 117.22 7.73
 1 27 -5 37.17 4.84
 2 27 -6 7.09 4.08
 -3 26 -1 39.46 6.08
 -2 26 -2 14.58 4.59
 -1 26 -3 13.83 2.7
 0 26 -4 11.88 3.68
 1 26 -5 68.33 5.99
 -3 25 -1 5.11 4.54
 -2 25 -2 123.19 8.4
 -1 25 -3 5.65 2.51
 0 25 -4 80.25 6.11
 1 25 -5 61.84 5.66
 2 25 -6 21.17 4.48
 -3 24 -1 1.03 4.18
 -2 24 -2 233.44 11.95
 -1 24 -3 168.35 6.35
 0 24 -4 211.09 11.17
 1 24 -5 8.5 3.63
 2 24 -6 24.94 4.56
 -3 23 -1 5.39 4.07
 -2 23 -2 90.23 6.72
 -1 23 -3 43.55 3.06
 0 23 -4 43.6 4.57
 1 23 -5 165.53 9.81
 2 23 -6 21.56 4.31
 -3 22 -1 84.24 6.95
 -2 22 -2 5.67 3.43
 -1 22 -3 4.73 2.05
 0 22 -4 -1.37 2.78
 1 22 -5 40.66 4.81
 2 22 -6 -0.52 3.34
 -4 21 0 5.14 4.7
 -3 21 -1 12.19 4.08
 -2 21 -2 28.76 4.2
 -1 21 -3 172.61 6.4
 0 21 -4 9.07 3.16
 1 21 -5 221.98 11.73
 2 21 -6 -0.12 3.27
 -4 20 0 7.85 4.7
 -3 20 -1 36.82 4.87
 -2 20 -2 414.7 12.58
 -1 20 -3 95.53 4.18
 0 20 -4 518.34 23.15
 1 20 -5 104.8 7.28
 2 20 -6 8.54 2.48
 -4 19 0 15.97 4.56
 -3 19 -1 27.38 4.33
 -2 19 -2 196.26 6.58
 -1 19 -3 26.02 2.21
 0 19 -4 119.81 7.12
 1 19 -5 84.33 6.22
 2 19 -6 119.52 5.43
 3 19 -7 -2.31 2.76
 -4 18 0 77.55 6.99
 -3 18 -1 37.72 4.59
 -2 18 -2 130.93 5.15
 -1 18 -3 4.25 1.71
 0 18 -4 40.08 3.85
 1 18 -5 69.72 5.43
 2 18 -6 24.42 2.93
 3 18 -7 10.89 2.93
 -4 17 0 3 4.04
 -3 17 -1 34.11 4.36
 -2 17 -2 0.98 1.63
 -1 17 -3 161.35 5.69
 0 17 -4 454.78 13.48
 1 17 -5 263.69 9.21
 2 17 -6 135.82 5.82
 3 17 -7 25.98 3.35
 -4 16 0 3.24 3.94
 -3 16 -1 308.61 14.86
 -2 16 -2 8.18 1.64
 -1 16 -3 1268.56 35.37
 0 16 -4 -0.31 1.47
 1 16 -5 506.34 16.06
 2 16 -6 21.38 2.58
 3 16 -7 24.74 3.17
 -4 15 0 3.67 3.75
 -3 15 -1 208.29 11.23
 -2 15 -2 161.79 5.55
 -1 15 -3 493.42 14.51
 0 15 -4 46.51 2.43
 1 15 -5 99.7 5.92
 2 15 -6 183.2 6.93
 3 15 -7 55.72 3.98
 -4 14 0 153.64 9.22
 -3 14 -1 49.16 4.65
 -2 14 -2 73.74 3.18
 -1 14 -3 807.48 22.2
 0 14 -4 97.25 3.8
 1 14 -5 2.92 1.71
 2 14 -6 90.73 4.54
 3 14 -7 12.15 2.82
 -4 13 0 10.9 3.84
 -3 13 -1 5.65 2.85
 -2 13 -2 95.5 3.74
 -1 13 -3 22.1 1.73
 0 13 -4 1031 28.69
 1 13 -5 211.3 7.1
 2 13 -6 416.39 13.37
 3 13 -7 6.14 2.62
 -4 12 0 143.62 8.82
 -3 12 -1 67.22 5.05
 -2 12 -2 930.18 25.26
 -1 12 -3 62.23 2.68
 0 12 -4 982.52 22.74
 1 12 -5 197.17 6.7
 2 12 -6 306.36 10.28
 3 12 -7 16.66 2.91
 -4 11 0 124.07 8.04
 -3 11 -1 349.84 16.7
 -2 11 -2 189.45 6.13
 -1 11 -3 369.74 10.64
 0 11 -4 969.02 22.4
 1 11 -5 156.37 5.73
 2 11 -6 20.63 2.38
 3 11 -7 101.16 5.03
 -4 10 0 0.94 3.22
 -3 10 -1 308.42 9.61
 -2 10 -2 318.07 9.43
 -1 10 -3 578.24 23.44
 0 10 -4 540.15 15.82
 1 10 -5 263.77 8.49
 2 10 -6 4.97 1.95
 3 10 -7 57.98 3.85
 -4 9 0 3.68 3.13
 -3 9 -1 21.03 1.95
 -2 9 -2 4.11 1.85
 -1 9 -3 860.2 30.62
 0 9 -4 123.94 4.26
 1 9 -5 913.96 26.75
 2 9 -6 25.23 2.45
 3 9 -7 232.98 12.75
 -4 8 0 118.15 7.39
 -3 8 -1 235.07 7.5
 -2 8 -2 104.5 5.32
 -1 8 -3 1035.35 38.76
 0 8 -4 420.9 12.15
 1 8 -5 235.32 7.62
 2 8 -6 100.7 4.45
 3 8 -7 150.15 9.19
 -4 7 0 112.74 7.46
 -3 7 -1 24.26 1.91
 -2 7 -2 959.51 36.53
 -1 7 -3 246.03 10.27
 0 7 -4 470.14 13.32
 1 7 -5 369.78 11.37
 2 7 -6 135.48 5.44
 3 7 -7 1.87 3.19
 -4 6 0 118.77 7.28
 -3 6 -1 3.24 1.83
 -2 6 -2 838.33 31.32
 -1 6 -3 432.33 16.85
 0 6 -4 890.26 24.98
 1 6 -5 -0.48 1.31
 2 6 -6 207.94 7.5
 3 6 -7 2.49 3.29
 -4 5 0 46.98 4.52
 -3 5 -1 5.6 2.05
 -2 5 -2 241 10.37
 -1 5 -3 49.14 3.03
 0 5 -4 858.44 23.88
 1 5 -5 76.33 3.24
 2 5 -6 297.72 9.81
 3 5 -7 85.53 6.43
 -4 4 0 77.86 5.64
 -3 4 -1 396.07 16.24
 -2 4 -2 147.54 4.58
 -1 4 -3 57.13 3.18
 0 4 -4 335.97 9.76
 1 4 -5 267.06 8.53
 2 4 -6 30.86 2.5
 3 4 -7 55 5.18
 -4 3 0 4.24 2.66
 -3 3 -1 263.82 11.6
 -2 3 -2 37.67 1.68
 -1 3 -3 776.01 21.92
 0 3 -4 119.86 3.91
 1 3 -5 202.91 6.66
 2 3 -6 6.87 1.8
 3 3 -7 153.67 9.02
 -4 2 0 55.32 4.64
 -3 2 -1 239.35 10.29
 -2 2 -2 12.92 1.14
 -1 2 -3 460.75 13.46
 0 2 -4 133.64 4.34
 1 2 -5 564.35 16.87
 2 2 -6 60.7 3.03
 3 2 -7 32.86 4.29
 -3 1 -1 137.15 6.65
 -2 1 -2 159.48 5.16
 -1 1 -3 109.06 3.6
 0 1 -4 18.26 1.22
 1 1 -5 112.77 4.15
 2 1 -6 295.8 9.57
 3 1 -7 25.7 4.05
 -4 0 0 358.28 15.23
 -3 0 -1 -0.43 1.83
 -2 0 -2 347.66 10.33
 -1 0 -3 -0.72 0.67
 0 0 -4 14.78 1.15
 1 0 -5 -0.15 1.2
 2 0 -6 195.1 9.86
 3 0 -7 -0.59 3.32
 -3 -1 -1 136.04 4.85
 -2 -1 -2 171.43 5.28
 -1 -1 -3 118.97 3.69
 0 -1 -4 20.41 1.28
 1 -1 -5 113.56 4.14
 2 -1 -6 296.09 14.21
 3 -1 -7 29.55 4.22
 -4 -2 0 58.07 4.22
 -3 -2 -1 231.27 7.56
 -2 -2 -2 12.39 1.26
 -1 -2 -3 477.52 13.54
 0 -2 -4 131.28 4.35
 1 -2 -5 543.12 16.74
 2 -2 -6 46.11 4.11
 3 -2 -7 35.43 4.47
 -4 -3 0 1.88 2.43
 -3 -3 -1 268.58 12.65
 -2 -3 -2 36.53 1.89
 -1 -3 -3 783.31 22.01
 0 -3 -4 116.22 3.88
 1 -3 -5 196.73 6.48
 2 -3 -6 4.33 2.62
 3 -3 -7 152.15 9.11
 -3 -4 -1 403.13 17.86
 -2 -4 -2 147.54 7.14
 -1 -4 -3 61.91 2.3
 0 -4 -4 329.78 9.73
 1 -4 -5 265.13 8.3
 2 -4 -6 40.11 3.92
 3 -4 -7 63.22 5.51
 -4 -5 0 48.95 4.5
 -2 -5 -2 245.56 11.49
 -1 -5 -3 52.81 2.17
 0 -5 -4 860.7 23.83
 1 -5 -5 78.13 3.02
 2 -5 -6 287.59 14.4
 3 -5 -7 85.99 6.58
 -4 -6 0 116.22 7.25
 -3 -6 -1 6.49 2.36
 -2 -6 -2 717.27 34.24
 -1 -6 -3 421.42 12.37
 0 -6 -4 864.41 24.88
 1 -6 -5 1.25 1.14
 2 -6 -6 217.95 11.06
 3 -6 -7 -0.49 3.14
 -4 -7 0 129.5 7.68
 -3 -7 -1 20.76 3
 -2 -7 -2 952.35 40.23
 -1 -7 -3 230.52 11.2
 0 -7 -4 443.85 13.2
 1 -7 -5 348.93 10.96
 2 -7 -6 142.93 8.01
 3 -7 -7 13.95 3.75
 -4 -8 0 117.14 7.32
 -3 -8 -1 231.01 11.59
 -2 -8 -2 112.13 6.26
 -1 -8 -3 975.54 42.41
 0 -8 -4 401.38 12
 1 -8 -5 221.8 7.13
 2 -8 -6 100.75 6.46
 3 -8 -7 158.94 9.41
 -4 -9 0 15.24 3.59
 -3 -9 -1 29.53 3.42
 -2 -9 -2 7.07 2.21
 -1 -9 -3 765.96 33.53
 0 -9 -4 128.12 4.2
 1 -9 -5 891.67 39.39
 2 -9 -6 22.31 3.49
 3 -9 -7 249.41 13.01
 -4 -10 0 3.16 3.22
 -3 -10 -1 327.48 15.04
 -2 -10 -2 309.35 14.65
 -1 -10 -3 583.5 25.86
 0 -10 -4 540.76 15.71
 1 -10 -5 240.57 12.21
 2 -10 -6 5.52 2.89
 3 -10 -7 65.8 5.85
 -4 -11 0 135.45 8.22
 -3 -11 -1 386.17 17.69
 -2 -11 -2 184.28 9.72
 -1 -11 -3 315.34 16.38
 0 -11 -4 953.25 27.51
 1 -11 -5 155.05 8.38
 2 -11 -6 26.17 3.8
 3 -11 -7 105.02 7.52
 -4 -12 0 148.7 9.08
 -3 -12 -1 70.48 5.26
 -2 -12 -2 852.43 38.74
 -1 -12 -3 62.07 4.41
 0 -12 -4 953.82 27.89
 1 -12 -5 191.18 9.72
 2 -12 -6 307.3 15.04
 3 -12 -7 12.72 4.03
 -4 -13 0 11.88 3.83
 -3 -13 -1 3.08 2.92
 -2 -13 -2 101.65 6.31
 -1 -13 -3 21.92 3.08
 0 -13 -4 1008.66 29.31
 1 -13 -5 205.29 10.33
 2 -13 -6 415.82 19.61
 3 -13 -7 5.34 3.87
 -4 -14 0 148.37 9.27
 -3 -14 -1 47.85 4.76
 -2 -14 -2 70.65 5.27
 -1 -14 -3 738.82 34.06
 0 -14 -4 102.7 6.21
 1 -14 -5 3.43 2.51
 2 -14 -6 88.72 6.53
 3 -14 -7 17.48 4.16
 -4 -15 0 10.87 4.02
 -3 -15 -1 238.29 12.14
 -2 -15 -2 162.55 8.98
 -1 -15 -3 524.33 22.65
 0 -15 -4 45.99 4.03
 1 -15 -5 109.77 6.55
 2 -15 -6 175.54 10.01
 3 -15 -7 59.76 5.85
 -4 -16 0 13.11 4.2
 -3 -16 -1 308.96 15.64
 -2 -16 -2 10.18 3
 -1 -16 -3 1343.46 54.4
 0 -16 -4 1.42 2.48
 1 -16 -5 510.87 23.69
 2 -16 -6 14.31 3.46
 3 -16 -7 22.21 4.5
 -4 -17 0 9.52 4.04
 -3 -17 -1 42.53 4.58
 -2 -17 -2 3.08 2.79
 -1 -17 -3 168.22 9.15
 0 -17 -4 435.42 20.76
 1 -17 -5 281.2 13.67
 2 -17 -6 137.81 8.46
 3 -17 -7 21.14 4.51
 -4 -18 0 75.02 6.91
 -3 -18 -1 40.67 4.75
 -2 -18 -2 142.83 8.41
 -1 -18 -3 4.84 2.87
 0 -18 -4 27.33 3.69
 1 -18 -5 71.05 5.42
 2 -18 -6 31.63 4.46
 3 -18 -7 14.78 4.4
 -4 -19 0 21.01 4.78
 -3 -19 -1 27.87 4.41
 -2 -19 -2 166.36 10.24
 -1 -19 -3 16.13 3.56
 0 -19 -4 120.42 7.51
 1 -19 -5 88.05 6.37
 2 -19 -6 116.84 7.84
 3 -19 -7 4.76 4.14
 -4 -20 0 21.32 4.76
 -3 -20 -1 44.61 5.1
 -2 -20 -2 378.8 19.48
 -1 -20 -3 98.85 6.76
 0 -20 -4 547.13 25.19
 1 -20 -5 120.53 7.58
 2 -20 -6 6.3 3.59
 -4 -21 0 16.8 4.67
 -3 -21 -1 16.39 3.9
 -2 -21 -2 31.53 4.25
 -1 -21 -3 178.65 10.11
 0 -21 -4 11.41 3.35
 1 -21 -5 222.56 12.24
 2 -21 -6 -1.23 3.3
 -3 -22 -1 79.49 6.89
 -2 -22 -2 3.61 3.31
 -1 -22 -3 5.82 3.13
 0 -22 -4 -0.67 2.98
 1 -22 -5 46.41 4.88
 2 -22 -6 0.44 3.3
 -3 -23 -1 -1.91 3.59
 -2 -23 -2 80.14 6.56
 -1 -23 -3 36.93 4.62
 0 -23 -4 46.46 4.92
 1 -23 -5 181.22 10.48
 2 -23 -6 10.55 3.93
 -3 -24 -1 0.24 3.49
 -2 -24 -2 208.9 12.05
 -1 -24 -3 149.43 9.46
 0 -24 -4 219.48 12.06
 1 -24 -5 -0.3 3.25
 2 -24 -6 25.79 4.63
 -3 -25 -1 -4.06 3.58
 -2 -25 -2 125.02 8.35
 -1 -25 -3 7.27 3.39
 0 -25 -4 79.79 6.51
 1 -25 -5 56.22 5.69
 2 -25 -6 26.25 4.65
 -3 -26 -1 51.16 5.9
 -2 -26 -2 17.01 4.09
 -1 -26 -3 15.48 3.85
 0 -26 -4 9.67 3.87
 1 -26 -5 74.83 6.42
 2 -26 -6 12.1 4.32
 -3 -27 -1 21.9 5.05
 -2 -27 -2 42.39 5.19
 -1 -27 -3 40.85 4.89
 0 -27 -4 119.81 8.34
 1 -27 -5 31.14 5.03
 2 -27 -6 8.13 4.19
 -3 -28 -1 57.98 6.52
 -2 -28 -2 3.67 3.69
 -1 -28 -3 175.9 10.75
 0 -28 -4 30.22 5.02
 1 -28 -5 39.44 5.34
 -2 -29 -2 97.63 7.61
 -1 -29 -3 44.46 5.33
 0 -29 -4 29.66 5.03
 1 -29 -5 -3.62 3.77
 -2 -30 -2 38.27 5.4
 -1 -30 -3 50.86 5.64
 0 -30 -4 37.29 5.6
 1 -30 -5 -0.2 3.99
 -2 -31 -2 8.57 4.1
 -1 -31 -3 2.96 3.59
 0 -31 -4 112.08 8.61
 1 -31 -5 -6.3 3.89
 -1 -32 -3 73.57 6.71
 0 -32 -4 31.21 5.42
 -1 -33 -3 102.71 7.9
 0 -33 -4 1.03 4.44
 0 32 -5 1.61 4.14
 -2 31 -3 1.14 4.84
 -1 31 -4 7.12 4.18
 0 31 -5 4.47 4.12
 -2 30 -3 18.17 5.22
 -1 30 -4 117.72 8.07
 0 30 -5 41.35 5.4
 1 30 -6 55.35 6.15
 -2 29 -3 -7.17 4.46
 -1 29 -4 -3.39 3.55
 0 29 -5 16.35 4.59
 1 29 -6 -0.71 3.91
 -2 28 -3 212.6 11.74
 -1 28 -4 40.43 5.01
 0 28 -5 192.06 10.77
 1 28 -6 14.65 4.34
 -3 27 -2 1.75 4.82
 -2 27 -3 -0.74 4.16
 0 27 -5 3.51 3.83
 1 27 -6 -3.5 3.77
 -3 26 -2 102.14 8.21
 -2 26 -3 73.16 6.46
 -1 26 -4 244.33 12.42
 0 26 -5 175.13 10.09
 1 26 -6 155.19 9.65
 -3 25 -2 -1.65 4.33
 -2 25 -3 9.95 4.26
 -1 25 -4 9.57 3.85
 0 25 -5 -1.86 3.28
 1 25 -6 62.79 6.01
 2 25 -7 10.04 4.27
 -3 24 -2 161.98 10.35
 -2 24 -3 116.67 7.64
 -1 24 -4 331.22 10.5
 0 24 -5 151.6 8.81
 1 24 -6 209.92 11.71
 2 24 -7 30.11 4.92
 -3 23 -2 -1.8 3.75
 -2 23 -3 -3.01 2.29
 -1 23 -4 21.75 2.6
 0 23 -5 19.17 3.97
 1 23 -6 16.16 4.27
 2 23 -7 4.27 3.93
 -3 22 -2 8.59 3.95
 -2 22 -3 479.42 14.25
 -1 22 -4 73.58 3.73
 0 22 -5 666.45 28.94
 1 22 -6 27.5 4.53
 2 22 -7 77.62 6.83
 -3 21 -2 46.67 5.08
 -2 21 -3 -1.7 1.97
 -1 21 -4 10.44 2.23
 0 21 -5 100.81 6.97
 1 21 -6 45.67 4.96
 2 21 -7 17.88 3.06
 -4 20 -1 124.39 8.95
 -3 20 -2 117.69 7.71
 -2 20 -3 161.16 5.86
 -1 20 -4 395.05 12.11
 0 20 -5 420.55 18.87
 1 20 -6 123.18 8.04
 2 20 -7 109.26 5.38
 -4 19 -1 5.41 4.1
 -3 19 -2 -1.17 3.21
 -2 19 -3 59.55 3.23
 -1 19 -4 -4.04 1.78
 0 19 -5 6.75 2.9
 1 19 -6 77.06 6.26
 2 19 -7 21.12 2.86
 -4 18 -1 3.46 4.19
 -3 18 -2 211.5 11.05
 -2 18 -3 0.85 1.77
 -1 18 -4 1227.66 34.67
 0 18 -5 26.22 3.62
 1 18 -6 269.94 9.24
 2 18 -7 3.89 2.35
 -4 17 -1 4.93 4.01
 -3 17 -2 38.36 4.44
 -2 17 -3 85.73 3.8
 -1 17 -4 16.6 1.93
 0 17 -5 53.96 4.65
 1 17 -6 52.34 3.23
 2 17 -7 8.38 2.37
 -4 16 -1 202.33 11.2
 -3 16 -2 55.43 4.86
 -2 16 -3 368.13 11.18
 -1 16 -4 286.32 8.8
 0 16 -5 414.96 19.09
 1 16 -6 171.74 6.38
 2 16 -7 142.74 6.04
 3 16 -8 7.3 2.86
 -4 15 -1 17.73 4.29
 -3 15 -2 51.8 4.69
 -2 15 -3 66.63 3.15
 -1 15 -4 9.07 1.63
 0 15 -5 159.05 8.56
 1 15 -6 1.21 1.87
 2 15 -7 52.01 3.59
 3 15 -8 5.51 2.81
 -4 14 -1 91.51 6.88
 -3 14 -2 22.44 3.52
 -2 14 -3 320.46 9.89
 -1 14 -4 551.53 15.65
 0 14 -5 479.58 14.52
 1 14 -6 49.69 3.02
 2 14 -7 55.64 3.59
 3 14 -8 14.95 2.94
 -4 13 -1 3.83 3.53
 -3 13 -2 -0.78 1.74
 -2 13 -3 50.52 2.64
 -1 13 -4 2.14 1.35
 0 13 -5 4.55 1.05
 1 13 -6 1.03 1.78
 2 13 -7 16.55 2.62
 3 13 -8 6.37 3.74
 -4 12 -1 35.51 4.59
 -3 12 -2 393.67 11.85
 -2 12 -3 54.61 2.73
 -1 12 -4 749.47 29.07
 0 12 -5 101.73 2.92
 1 12 -6 344.43 11.1
 2 12 -7 7.03 2.24
 3 12 -8 98.92 7.1
 -4 11 -1 2.99 3.21
 -3 11 -2 109.35 4.45
 -2 11 -3 -1.27 1.95
 -1 11 -4 0.7 1.76
 0 11 -5 74.14 3.01
 1 11 -6 188.06 6.65
 2 11 -7 7.68 2.3
 3 11 -8 11.46 3.98
 -4 10 -1 56.69 5.11
 -3 10 -2 38.67 2.5
 -2 10 -3 494.31 20.1
 -1 10 -4 0.14 1.78
 0 10 -5 373.46 11.23
 1 10 -6 31.25 2.36
 2 10 -7 171.83 6.66
 3 10 -8 -2.57 3.48
 -4 9 -1 3.93 3.1
 -3 9 -2 14.12 2.34
 -2 9 -3 86.58 4.89
 -1 9 -4 8.74 2.04
 0 9 -5 28.16 1.82
 1 9 -6 75.86 3.52
 2 9 -7 2.27 2
 3 9 -8 -3.3 3.53
 -4 8 -1 62.24 5.18
 -3 8 -2 224.58 10.05
 -2 8 -3 871.65 32.47
 -1 8 -4 10.84 2.02
 0 8 -5 802.75 23.24
 1 8 -6 216.24 7.11
 2 8 -7 83.82 4.13
 3 8 -8 88.78 6.94
 -4 7 -1 7.63 3.08
 -3 7 -2 42.79 3.46
 -2 7 -3 27.72 2.64
 -1 7 -4 128 6.51
 0 7 -5 1.68 1.09
 1 7 -6 74.02 3.37
 2 7 -7 27.06 2.58
 3 7 -8 23.03 4.28
 -4 6 -1 1.57 2.8
 -3 6 -2 451.51 18.23
 -2 6 -3 160.11 7.41
 -1 6 -4 83.83 4.43
 0 6 -5 182.79 5.94
 1 6 -6 636.22 18.72
 2 6 -7 39.92 2.93
 3 6 -8 170.59 10.24
 -4 5 -1 44.98 4.4
 -3 5 -2 4.62 2.07
 -2 5 -3 286.24 12.33
 -1 5 -4 6.57 1.7
 0 5 -5 334.71 10
 1 5 -6 3.48 1.48
 2 5 -7 16.3 3.35
 3 5 -8 15.96 4.04
 -3 4 -2 92.81 5.06
 -2 4 -3 1301.6 51.36
 -1 4 -4 835.7 24.49
 0 4 -5 907.22 25.84
 1 4 -6 109.56 4.2
 2 4 -7 428.95 13.77
 3 4 -8 2.55 3.43
 -3 3 -2 50.98 3.76
 -2 3 -3 102.4 3.4
 -1 3 -4 40.66 1.75
 0 3 -5 10.15 1.24
 1 3 -6 43.67 2.62
 2 3 -7 64.29 3.73
 3 3 -8 6.32 3.69
 -4 2 -1 350.81 14.77
 -3 2 -2 181.91 8.31
 -2 2 -3 123.24 3.97
 -1 2 -4 160.55 4.98
 0 2 -5 280.03 8.26
 1 2 -6 561.24 16.92
 2 2 -7 580.33 26.34
 3 2 -8 105.84 7.29
 -4 1 -1 17.57 3.02
 -3 1 -2 164.82 8.12
 -2 1 -3 22.16 1.44
 -1 1 -4 54.67 2.3
 0 1 -5 104.06 3.59
 1 1 -6 128.84 5.84
 2 1 -7 47.26 4.57
 3 1 -8 26.68 4.42
 -4 0 -1 2.87 2.52
 -3 0 -2 1109.75 43.23
 -2 0 -3 0.61 1.03
 -1 0 -4 2625.03 72.76
 0 0 -5 -1.55 1.02
 1 0 -6 1165.04 33.33
 2 0 -7 1.5 2.65
 3 0 -8 156.75 9.54
 -4 -1 -1 15.06 2.95
 -3 -1 -2 182.52 8.25
 -2 -1 -3 20.25 1.51
 -1 -1 -4 59.95 2.31
 0 -1 -5 101.14 3.6
 1 -1 -6 122.36 4.54
 2 -1 -7 68.43 4.92
 3 -1 -8 29.26 4.58
 -4 -2 -1 330.37 14.75
 -3 -2 -2 177.55 6.07
 -2 -2 -3 114.22 4.12
 -1 -2 -4 165.25 5.06
 0 -2 -5 272.03 8.23
 1 -2 -6 552.22 16.8
 2 -2 -7 557.92 26.36
 3 -2 -8 102.45 7.42
 -4 -3 -1 20.18 3.13
 -3 -3 -2 53.95 2.75
 -2 -3 -3 97.18 3.66
 -1 -3 -4 43.01 1.95
 0 -3 -5 6.76 1.24
 1 -3 -6 37.54 2.21
 2 -3 -7 54.28 4.74
 3 -3 -8 1.49 3.36
 -4 -4 -1 250.01 11.73
 -3 -4 -2 91.83 3.78
 -2 -4 -3 1322.65 37.92
 -1 -4 -4 882.67 24.61
 0 -4 -5 892.88 25.8
 1 -4 -6 108.22 4.02
 2 -4 -7 455.86 20.42
 3 -4 -8 0.62 3.49
 -4 -5 -1 56.79 4.25
 -3 -5 -2 5.41 1.62
 -2 -5 -3 299.71 9.15
 -1 -5 -4 6.6 1.1
 0 -5 -5 339.68 9.96
 2 -5 -7 10.01 2.95
 3 -5 -8 21.38 4.25
 -4 -6 -1 6.01 2.77
 -3 -6 -2 439.9 20.09
 -2 -6 -3 164.51 5.55
 -1 -6 -4 87.37 3.13
 0 -6 -5 188.31 5.91
 1 -6 -6 634.45 18.45
 2 -6 -7 37.63 4.13
 3 -6 -8 171 10.34
 -3 -7 -2 58.67 4.28
 -2 -7 -3 35.13 3.21
 -1 -7 -4 146.56 4.72
 0 -7 -5 5.59 1.51
 1 -7 -6 67.42 4.85
 2 -7 -7 31.84 3.92
 3 -7 -8 29.4 4.56
 -3 -8 -2 233.09 11.47
 -2 -8 -3 839.99 35.73
 -1 -8 -4 14.29 1.39
 0 -8 -5 782.95 23.11
 1 -8 -6 199.4 10.39
 2 -8 -7 85.32 5.99
 3 -8 -8 96.22 7.19
 -3 -9 -2 22.71 3.37
 -2 -9 -3 96.83 5.75
 -1 -9 -4 5.12 1.24
 0 -9 -5 30.89 1.77
 1 -9 -6 74.79 5.14
 2 -9 -7 10.2 3.19
 3 -9 -8 1.32 3.64
 -4 -10 -1 63.65 5.47
 -3 -10 -2 45.9 4.26
 -2 -10 -3 503.33 22.41
 -1 -10 -4 1.29 1.14
 0 -10 -5 365.78 11.09
 1 -10 -6 27.89 3.27
 2 -10 -7 178.65 9.77
 3 -10 -8 4.67 3.86
 -4 -11 -1 11.12 3.64
 -3 -11 -2 115.46 7.13
 -2 -11 -3 4.17 2.54
 -1 -11 -4 0.18 1.87
 0 -11 -5 70.63 2.85
 1 -11 -6 185.68 9.71
 2 -11 -7 3.17 3.06
 3 -11 -8 22.3 4.56
 -4 -12 -1 45.33 5.03
 -3 -12 -2 405.44 18.59
 -2 -12 -3 57.4 4.66
 -1 -12 -4 740.74 31.85
 0 -12 -5 93.33 3.6
 1 -12 -6 326.22 16.22
 2 -12 -7 6.55 3.18
 3 -12 -8 91.2 7.24
 -4 -13 -1 4.54 3.92
 -2 -13 -3 45.35 4.42
 -1 -13 -4 5.52 2.33
 0 -13 -5 9.45 1.42
 1 -13 -6 4.18 2.5
 2 -13 -7 20.4 3.69
 3 -13 -8 11.81 4.06
 -4 -14 -1 91.32 7.23
 -3 -14 -2 26.84 3.85
 -2 -14 -3 304.13 15.44
 -1 -14 -4 517.05 24.09
 0 -14 -5 487.99 14.36
 1 -14 -6 50.71 4.44
 2 -14 -7 54.2 5.19
 3 -14 -8 22.98 4.7
 -4 -15 -1 24.35 4.71
 -3 -15 -2 51.8 5.08
 -2 -15 -3 62.66 5.08
 -1 -15 -4 11.5 2.71
 0 -15 -5 177.04 5.82
 1 -15 -6 -1.79 2.46
 2 -15 -7 54.25 5.18
 3 -15 -8 7.37 4.37
 -4 -16 -1 192.73 11.57
 -3 -16 -2 46.94 5
 -2 -16 -3 362.07 17.47
 -1 -16 -4 256.03 13.67
 0 -16 -5 443.86 13.55
 1 -16 -6 162.02 9.34
 2 -16 -7 138.2 8.76
 3 -16 -8 6.17 4.18
 -4 -17 -1 10.16 4.26
 -3 -17 -2 42.36 4.96
 -2 -17 -3 84.02 6.22
 -1 -17 -4 23.44 3.44
 0 -17 -5 56.57 2.77
 1 -17 -6 47.94 4.64
 2 -17 -7 4.57 3.57
 -4 -18 -1 0.84 4.01
 -3 -18 -2 199.07 11.66
 -2 -18 -3 8.68 3.18
 -1 -18 -4 1192.53 53.17
 0 -18 -5 33.38 3.94
 1 -18 -6 262.59 13.58
 2 -18 -7 3.36 3.43
 -4 -19 -1 3.5 4.19
 -3 -19 -2 1.96 3.29
 -2 -19 -3 62.44 5.3
 -1 -19 -4 6.62 3.13
 0 -19 -5 4.68 3.13
 1 -19 -6 82.11 6.18
 2 -19 -7 26.39 4.45
 -4 -20 -1 131.7 9.26
 -3 -20 -2 118.39 8.18
 -2 -20 -3 144.89 9.04
 -1 -20 -4 385.54 18.8
 0 -20 -5 436.04 20.38
 1 -20 -6 122.56 8.15
 2 -20 -7 102.89 7.72
 -3 -21 -2 38.21 5.1
 -2 -21 -3 8.44 3.23
 -1 -21 -4 15.4 3.42
 0 -21 -5 112.42 7.42
 1 -21 -6 43.53 4.81
 2 -21 -7 12.69 4.31
 -3 -22 -2 10.66 3.93
 -2 -22 -3 449.33 21.94
 -1 -22 -4 67.87 5.71
 0 -22 -5 685.03 31.31
 1 -22 -6 32.07 4.43
 2 -22 -7 80.65 7.16
 -3 -23 -2 1.51 3.57
 -2 -23 -3 6.98 3.63
 -1 -23 -4 25.91 4.01
 0 -23 -5 19.94 4.05
 1 -23 -6 18.75 4
 2 -23 -7 3.79 4.18
 -3 -24 -2 167.47 10.64
 -2 -24 -3 100.06 7.61
 -1 -24 -4 302.49 15.98
 0 -24 -5 146.5 9.33
 1 -24 -6 210 12.31
 2 -24 -7 21.3 4.93
 -3 -25 -2 3.45 3.89
 -2 -25 -3 12.94 3.95
 -1 -25 -4 12.68 3.71
 0 -25 -5 -2.48 3.33
 1 -25 -6 55.4 5.84
 2 -25 -7 4.56 4.13
 -3 -26 -2 84.49 7.59
 -2 -26 -3 73.78 6.45
 -1 -26 -4 237.85 13.39
 0 -26 -5 185.4 10.86
 1 -26 -6 158.64 10.15
 -3 -27 -2 10.57 4.42
 -2 -27 -3 1.42 3.51
 -1 -27 -4 -0.86 3.48
 0 -27 -5 -2.4 3.59
 1 -27 -6 1.58 3.71
 -2 -28 -3 190.79 11.73
 -1 -28 -4 38.25 5.16
 0 -28 -5 192.66 11.57
 1 -28 -6 13.28 4.39
 -2 -29 -3 -1.94 3.67
 -1 -29 -4 1.64 3.83
 0 -29 -5 20.09 4.74
 1 -29 -6 0.87 3.9
 -2 -30 -3 15.35 4.59
 -1 -30 -4 113.39 8.4
 0 -30 -5 40.03 5.78
 1 -30 -6 49.82 6.29
 -2 -31 -3 3.13 4.09
 -1 -31 -4 8.22 4.19
 0 -31 -5 2.55 4.23
 -1 -32 -4 79.13 7.27
 0 -32 -5 5.51 4.65
 -1 31 -5 -6.99 3.95
 -1 30 -5 28.05 5.07
 0 30 -6 69.48 6.9
 -2 29 -4 -0.03 4.55
 -1 29 -5 27.05 5.05
 0 29 -6 10.71 4.47
 -2 28 -4 43.37 5.88
 -1 28 -5 142.81 9
 0 28 -6 31.33 5.15
 1 28 -7 87.98 7.51
 -2 27 -4 26.71 5.14
 -1 27 -5 91.45 6.78
 0 27 -6 1.97 3.87
 1 27 -7 19.43 4.85
 -3 26 -3 28.53 5.64
 -2 26 -4 6.61 4.15
 -1 26 -5 1.26 3.63
 0 26 -6 67.39 6.24
 1 26 -7 51.45 6.05
 -3 25 -3 39.87 5.54
 -2 25 -4 3.47 2.66
 -1 25 -5 -2.52 3.24
 0 25 -6 53.6 5.57
 1 25 -7 -0.19 4.01
 -3 24 -3 11.47 4.3
 -2 24 -4 251.12 8.8
 -1 24 -5 21.44 3.96
 0 24 -6 197.29 10.66
 1 24 -7 8.78 4.47
 -3 23 -3 49.3 5.52
 -2 23 -4 15.31 2.59
 -1 23 -5 55.99 5.05
 0 23 -6 119.15 8.01
 1 23 -7 -1.03 3.82
 -3 22 -3 80.94 6.79
 -2 22 -4 -0.7 2.15
 -1 22 -5 16.07 3.54
 0 22 -6 2.87 3.33
 1 22 -7 109.55 8.06
 2 22 -8 10.58 3.01
 -3 21 -3 54.56 5.47
 -2 21 -4 2.06 2.06
 -1 21 -5 1.41 2.89
 0 21 -6 27.56 4.27
 1 21 -7 20.32 4.37
 2 21 -8 9.67 2.89
 -4 20 -2 39.11 5.5
 -3 20 -3 55.31 5.31
 -2 20 -4 346.69 10.84
 -1 20 -5 100.54 4.34
 0 20 -6 234.87 12.23
 1 20 -7 121.99 8.2
 2 20 -8 41.14 3.6
 -4 19 -2 36.22 5.41
 -3 19 -3 12.02 3.55
 -2 19 -4 21.66 2.44
 -1 19 -5 30.71 2.47
 0 19 -6 108.47 6.92
 1 19 -7 35.81 3.05
 2 19 -8 11.97 2.79
 -4 18 -2 73.78 6.79
 -3 18 -3 21.22 3.89
 -2 18 -4 144.37 5.48
 -1 18 -5 6.36 1.86
 0 18 -6 57.29 4.91
 1 18 -7 37.95 3.05
 2 18 -8 107.7 5.45
 -4 17 -2 43.28 5.43
 -3 17 -3 84.68 6.13
 -2 17 -4 37.6 2.62
 -1 17 -5 21.16 2.11
 0 17 -6 -1.36 2.71
 1 17 -7 22.64 2.57
 2 17 -8 0.5 2.53
 -4 16 -2 27.12 4.77
 -3 16 -3 378.4 17.38
 -2 16 -4 26.87 2.28
 -1 16 -5 747.64 21.29
 0 16 -6 10.98 3
 1 16 -7 356.6 11.49
 2 16 -8 8.42 2.72
 -4 15 -2 10.73 3.9
 -3 15 -3 8.32 2.11
 -2 15 -4 6.78 1.79
 -1 15 -5 78.74 3.43
 0 15 -6 -0.05 1.55
 1 15 -7 139.81 5.67
 2 15 -8 -0.11 2.42
 -4 14 -2 59.08 5.65
 -3 14 -3 129.86 5.08
 -2 14 -4 140.15 5.14
 -1 14 -5 263.85 8.25
 0 14 -6 138.45 5.33
 1 14 -7 116.53 4.79
 2 14 -8 167.79 6.72
 -3 13 -3 0.52 1.76
 -2 13 -4 222.1 10.58
 0 13 -6 29.62 2.15
 1 13 -7 11.09 2.04
 2 13 -8 11.27 2.89
 -4 12 -2 192.85 11.18
 -3 12 -3 42.44 2.71
 -2 12 -4 543.75 22.84
 -1 12 -5 223.38 10.12
 0 12 -6 645.41 19.14
 1 12 -7 28.38 2.42
 2 12 -8 284.25 9.69
 -4 11 -2 7.1 3.29
 -3 11 -3 3.89 2.37
 -2 11 -4 40.24 3.48
 -1 11 -5 52.27 3.8
 0 11 -6 102.25 4.04
 1 11 -7 84.83 3.94
 2 11 -8 20.77 2.77
 -4 10 -2 25.75 3.98
 -3 10 -3 267.65 11.65
 -2 10 -4 119.1 6.21
 -1 10 -5 720.47 28.32
 0 10 -6 289.49 8.92
 1 10 -7 451.71 14.21
 2 10 -8 1.23 2.2
 3 10 -9 86.84 7.01
 -4 9 -2 26.19 3.79
 -3 9 -3 330.26 14.07
 -2 9 -4 57.37 3.9
 -1 9 -5 214.48 9.58
 0 9 -6 -1.66 1.31
 1 9 -7 19.58 2.17
 2 9 -8 10.04 2.44
 3 9 -9 13.56 4.37
 -4 8 -2 70.03 5.43
 -3 8 -3 233.76 10.62
 -2 8 -4 264.73 11.49
 -1 8 -5 449.63 17.82
 0 8 -6 385.26 11.78
 1 8 -7 367.13 11.72
 2 8 -8 93.01 4.62
 3 8 -9 121.28 8.29
 -4 7 -2 23.03 3.65
 -3 7 -3 15.38 2.66
 -2 7 -4 63.62 4.26
 -1 7 -5 65.87 4.19
 0 7 -6 212.24 6.93
 1 7 -7 3.13 1.61
 2 7 -8 38.7 3.14
 3 7 -9 7.16 4.12
 -3 6 -3 4.67 2.29
 -2 6 -4 833.51 34.04
 -1 6 -5 35.9 1.69
 0 6 -6 1226.68 34.75
 1 6 -7 15.53 1.9
 2 6 -8 228.05 8.18
 3 6 -9 3.06 3.63
 -4 5 -2 54.75 4.43
 -3 5 -3 209.17 9.46
 -2 5 -4 252.54 11.46
 -1 5 -5 153.79 4.98
 0 5 -6 98.4 3.66
 1 5 -7 10.86 1.84
 2 5 -8 37.93 3.08
 3 5 -9 6.39 3.85
 -4 4 -2 72.76 4.96
 -3 4 -3 236.17 10.68
 -2 4 -4 62.34 4.09
 -1 4 -5 469.03 13.75
 0 4 -6 205.66 6.55
 1 4 -7 370.81 11.48
 2 4 -8 73.87 5.35
 3 4 -9 133.15 8.79
 -4 3 -2 5.65 2.76
 -3 3 -3 178.03 8.58
 -2 3 -4 13.63 2.22
 -1 3 -5 165.69 5.33
 0 3 -6 48.27 2.42
 1 3 -7 87.76 3.9
 2 3 -8 6.88 3.04
 3 3 -9 10.76 4.19
 -4 2 -2 8.53 2.95
 -3 2 -3 141.39 6.94
 -2 2 -4 88.41 4.89
 -1 2 -5 1453.31 39.99
 0 2 -6 360.2 10.7
 1 2 -7 360.15 11.36
 2 2 -8 68.94 5.38
 3 2 -9 102.35 7.57
 -4 1 -2 101.65 6.04
 -3 1 -3 6.96 2.39
 -2 1 -4 416.79 18.55
 -1 1 -5 116.61 3.88
 0 1 -6 17.92 1.57
 1 1 -7 61.61 3.13
 2 1 -8 30.14 3.81
 3 1 -9 10.01 4.04
 -4 0 -2 199.19 9.5
 -3 0 -3 0.78 2.14
 -2 0 -4 445.01 13.38
 -1 0 -5 -0.11 1
 0 0 -6 400.69 11.9
 1 0 -7 2.09 1.5
 2 0 -8 343.81 16.64
 3 0 -9 4.15 4.01
 -4 -1 -2 106.9 6.07
 -3 -1 -3 3.6 2.26
 -2 -1 -4 452.28 13.53
 -1 -1 -5 116.73 3.96
 0 -1 -6 18.27 1.67
 1 -1 -7 74.22 3.29
 2 -1 -8 14.72 3.29
 3 -1 -9 12.7 4.11
 -4 -2 -2 8.72 2.79
 -3 -2 -3 136.93 6.9
 -2 -2 -4 96.87 3.48
 -1 -2 -5 1407.58 40.02
 0 -2 -6 350.33 10.68
 1 -2 -7 354.8 11.28
 2 -2 -8 73.5 5.57
 3 -2 -9 109.63 7.77
 -4 -3 -2 2.71 2.55
 -3 -3 -3 171.86 8.63
 -2 -3 -4 15.08 1.56
 -1 -3 -5 164.52 5.38
 0 -3 -6 54.2 2.49
 1 -3 -7 98.48 3.85
 2 -3 -8 6.83 3.24
 3 -3 -9 17.58 4.38
 -4 -4 -2 71.65 5.08
 -3 -4 -3 241.3 10.82
 -2 -4 -4 71.65 2.96
 -1 -4 -5 479.33 13.84
 0 -4 -6 203.69 6.51
 1 -4 -7 364.8 11.3
 2 -4 -8 70.8 5.6
 3 -4 -9 134.44 8.92
 -4 -5 -2 59.13 4.57
 -3 -5 -3 208.99 9.67
 -2 -5 -4 277.8 8.47
 -1 -5 -5 151.68 5.08
 0 -5 -6 106.86 3.69
 1 -5 -7 10.11 2.64
 2 -5 -8 51.16 4.72
 3 -5 -9 -0.51 3.8
 -4 -6 -2 65.93 4.85
 -3 -6 -3 12.61 2.17
 -2 -6 -4 881.22 25.13
 -1 -6 -5 35.69 1.92
 0 -6 -6 1245.95 34.67
 1 -6 -7 10.66 2.74
 2 -6 -8 225.27 11.98
 3 -6 -9 -1.04 3.79
 -4 -7 -2 20.76 3.41
 -3 -7 -3 24.65 2.24
 -2 -7 -4 71.33 3.1
 -1 -7 -5 72.46 2.87
 0 -7 -6 220.39 6.86
 1 -7 -7 17.78 3.12
 2 -7 -8 47.65 4.74
 3 -7 -9 15.54 4.22
 -4 -8 -2 73.66 5.11
 -3 -8 -3 239.35 8.1
 -2 -8 -4 267.29 8.45
 -1 -8 -5 434.96 12.88
 0 -8 -6 384.27 11.65
 1 -8 -7 340.04 17.1
 2 -8 -8 98.53 6.86
 3 -8 -9 107.26 8.22
 -4 -9 -2 33.79 3.74
 -3 -9 -3 326.72 15.85
 -2 -9 -4 62.71 2.95
 -1 -9 -5 213.64 6.78
 0 -9 -6 4.56 2.25
 1 -9 -7 27.53 3.65
 2 -9 -8 4.62 3.12
 3 -9 -9 18.12 4.38
 -3 -10 -3 266.12 13.26
 -2 -10 -4 116.97 4.54
 -1 -10 -5 685.1 20.58
 0 -10 -6 286.45 8.78
 1 -10 -7 452.71 20.92
 2 -10 -8 -0.16 3.07
 3 -10 -9 89.62 7.25
 -3 -11 -3 12.4 3.36
 -2 -11 -4 42.41 3.75
 -1 -11 -5 51.44 2.56
 0 -11 -6 109.31 3.98
 1 -11 -7 78.28 5.69
 2 -11 -8 30.98 4.41
 -3 -12 -3 52.15 4.68
 -2 -12 -4 557.51 25.3
 -1 -12 -5 229.16 7.19
 0 -12 -6 638.98 18.95
 1 -12 -7 25.2 3.39
 2 -12 -8 261.54 14.02
 -3 -13 -3 -0.76 3.07
 -2 -13 -4 238.69 11.96
 -1 -13 -5 22.21 1.86
 0 -13 -6 29.55 2.01
 1 -13 -7 7.53 2.89
 2 -13 -8 9.19 3.55
 -3 -14 -3 127.49 8.15
 -2 -14 -4 134.24 8.04
 -1 -14 -5 269.5 8.43
 0 -14 -6 152.82 5.25
 1 -14 -7 101.51 6.83
 2 -14 -8 154.1 9.58
 -4 -15 -2 8.46 4
 -3 -15 -3 11.67 3.64
 -2 -15 -4 11.03 3.08
 -1 -15 -5 73.91 3.39
 0 -15 -6 1.7 2.55
 1 -15 -7 128.04 8.14
 2 -15 -8 -1.67 3.31
 -4 -16 -2 27.46 4.85
 -3 -16 -3 383.44 18.67
 -2 -16 -4 30.65 3.93
 -1 -16 -5 746.74 21.81
 0 -16 -6 9.89 2.88
 1 -16 -7 335.92 16.81
 2 -16 -8 10.54 4.01
 -4 -17 -2 45 5.67
 -3 -17 -3 88.33 6.72
 -2 -17 -4 36.84 4.22
 -1 -17 -5 23.48 3.49
 0 -17 -6 -1.25 2.5
 1 -17 -7 19.47 3.78
 2 -17 -8 0.14 3.47
 -4 -18 -2 95.15 7.68
 -3 -18 -3 20.83 4.18
 -2 -18 -4 153.37 8.76
 -1 -18 -5 0.36 2.61
 0 -18 -6 54.45 4.93
 1 -18 -7 43.54 4.6
 2 -18 -8 112.52 8.14
 -4 -19 -2 39.45 5.75
 -3 -19 -3 9.86 3.63
 -2 -19 -4 25.68 4.03
 -1 -19 -5 33.45 4.07
 0 -19 -6 95.05 7.02
 1 -19 -7 33.08 4.4
 2 -19 -8 7.99 3.92
 -4 -20 -2 31.16 5.22
 -3 -20 -3 66.74 5.95
 -2 -20 -4 332.9 16.78
 -1 -20 -5 98.16 6.83
 0 -20 -6 251.21 13.12
 1 -20 -7 118.3 8.06
 2 -20 -8 44.91 5.42
 -3 -21 -3 59.56 6
 -2 -21 -4 2.39 3.13
 -1 -21 -5 -3.01 2.8
 0 -21 -6 28.65 4.28
 1 -21 -7 20.81 4.13
 2 -21 -8 8.63 4.18
 -3 -22 -3 103.71 7.52
 -2 -22 -4 3.98 3.4
 -1 -22 -5 8.53 3.33
 0 -22 -6 4.27 3.49
 1 -22 -7 124.31 8.31
 2 -22 -8 5.34 4.16
 -3 -23 -3 56.26 5.82
 -2 -23 -4 11.62 3.65
 -1 -23 -5 49.99 5.21
 0 -23 -6 126.11 8.45
 1 -23 -7 -3.04 3.35
 -3 -24 -3 15.17 4.38
 -2 -24 -4 239.49 13.48
 -1 -24 -5 22.83 4.24
 0 -24 -6 185.51 11.08
 1 -24 -7 1.43 3.78
 -3 -25 -3 30.64 5.06
 -2 -25 -4 -1.15 3.3
 -1 -25 -5 -0.29 3.39
 0 -25 -6 56.33 5.94
 1 -25 -7 -0.84 3.75
 -3 -26 -3 27.08 4.85
 -2 -26 -4 4.54 3.59
 -1 -26 -5 1.73 3.53
 0 -26 -6 62.85 6.4
 1 -26 -7 46.81 5.9
 -2 -27 -4 20.23 4.39
 -1 -27 -5 83.01 7
 0 -27 -6 4.17 3.87
 -2 -28 -4 47.2 5.44
 -1 -28 -5 138.63 9.39
 0 -28 -6 25.88 5.13
 1 -28 -7 79.5 7.57
 -2 -29 -4 1.49 3.86
 -1 -29 -5 27.77 5.08
 0 -29 -6 7.59 4.53
 -2 -30 -4 32.45 5.31
 -1 -30 -5 33.72 5.39
 0 -30 -6 68 7.14
 -1 -31 -5 2.19 4.21
 -1 29 -6 101.79 7.91
 -1 28 -6 3.63 4.48
 0 28 -7 56.68 6.53
 -1 27 -6 41.9 5.32
 0 27 -7 89.98 7.47
 -2 26 -5 21.81 3.2
 -1 26 -6 41.65 5.14
 0 26 -7 66.51 6.62
 -3 25 -4 141.86 9.28
 -2 25 -5 7.59 2.73
 -1 25 -6 134.33 8.49
 0 25 -7 36.19 5.41
 1 25 -8 62.06 6.68
 -3 24 -4 7.16 4.21
 -2 24 -5 2.41 2.35
 -1 24 -6 15.74 4.08
 0 24 -7 12.75 4.28
 -3 23 -4 91.27 7.06
 -2 23 -5 77.01 4.2
 -1 23 -6 102.74 7.02
 0 23 -7 153.87 9.6
 1 23 -8 11.07 4.52
 -3 22 -4 4.78 3.74
 -2 22 -5 148.41 6.26
 -1 22 -6 6.25 3.41
 0 22 -7 69.4 6.21
 1 22 -8 29.84 5.18
 -3 21 -4 72.62 5.91
 -2 21 -5 151.4 5.79
 -1 21 -6 9.07 3.31
 0 21 -7 304.19 14.24
 1 21 -8 2.15 4.09
 -3 20 -4 14.13 3.81
 -2 20 -5 4.5 2.18
 -1 20 -6 3.94 3.06
 0 20 -7 34.09 4.55
 1 20 -8 65.25 6.5
 -3 19 -4 198.35 10.74
 -2 19 -5 66.37 3.61
 -1 19 -6 160.5 8.92
 0 19 -7 4.77 3.35
 1 19 -8 147.49 9.35
 2 19 -9 4.74 2.88
 -4 18 -3 10.57 4.21
 -3 18 -4 71.03 5.74
 -2 18 -5 43.12 2.96
 -1 18 -6 126.81 7.42
 0 18 -7 12.81 3.54
 1 18 -8 82.34 6.78
 2 18 -9 2.15 2.77
 -4 17 -3 95.87 7.17
 -3 17 -4 29.85 2.69
 -2 17 -5 174.57 6.23
 -1 17 -6 216.76 7.17
 0 17 -7 153.14 8.54
 1 17 -8 178.16 6.95
 2 17 -9 26.5 3.35
 -4 16 -3 40.19 5.2
 -3 16 -4 14.28 2.26
 -2 16 -5 24.66 2.43
 -1 16 -6 29.72 2.34
 0 16 -7 42.22 4.41
 1 16 -8 2.85 2.17
 2 16 -9 77.48 4.71
 -3 15 -4 4.29 1.99
 -2 15 -5 307.83 9.88
 -1 15 -6 15.8 2.04
 0 15 -7 146.58 8.15
 1 15 -8 15.89 2.46
 2 15 -9 94.11 5.01
 -4 14 -3 18.11 4.03
 -3 14 -4 30.56 2.55
 -2 14 -5 41.8 3.89
 -1 14 -6 251.84 11.62
 0 14 -7 52.69 4.71
 1 14 -8 37.86 2.98
 2 14 -9 51.24 3.85
 -4 13 -3 9.55 3.62
 -3 13 -4 160.7 5.85
 -2 13 -5 1.42 2.37
 -1 13 -6 442.77 19.42
 0 13 -7 95.17 6.1
 1 13 -8 246.77 8.81
 2 13 -9 57.16 3.98
 -4 12 -3 18.67 3.85
 -3 12 -4 105.91 6.3
 -2 12 -5 68.17 4.72
 -1 12 -6 132.07 6.97
 0 12 -7 4.79 2.74
 1 12 -8 64.86 3.58
 2 12 -9 4.07 2.49
 -4 11 -3 35.85 4.28
 -3 11 -4 418.92 17.62
 -2 11 -5 224.76 10.54
 -1 11 -6 161.86 8.17
 0 11 -7 57.59 2.94
 1 11 -8 88.53 4.19
 2 11 -9 57.13 3.91
 -4 10 -3 10.85 3.35
 -3 10 -4 23.51 3.13
 -2 10 -5 136.02 7.18
 -1 10 -6 16.99 2.89
 0 10 -7 255.12 8.42
 1 10 -8 14.53 2.2
 2 10 -9 43.63 3.48
 -4 9 -3 112.13 7.3
 -3 9 -4 6.7 2.6
 -2 9 -5 302.62 13.67
 -1 9 -6 89.17 5.43
 0 9 -7 612.5 18.23
 1 9 -8 15.52 2.17
 2 9 -9 260.91 9.33
 -3 8 -4 -0.74 2.42
 -2 8 -5 315.92 14.44
 0 8 -7 170.97 6.04
 1 8 -8 9.27 2.01
 2 8 -9 63.55 4.06
 -4 7 -3 77.61 5.21
 -3 7 -4 446.02 19.05
 -2 7 -5 35.68 3.33
 -1 7 -6 455.06 18.96
 0 7 -7 85.18 3.63
 1 7 -8 96.9 4.27
 2 7 -9 5.61 3.17
 -4 6 -3 4.67 2.82
 -3 6 -4 44.73 3.85
 -2 6 -5 4.96 2.31
 -1 6 -6 74.22 4.75
 0 6 -7 129.78 4.74
 1 6 -8 125.57 5.13
 2 6 -9 7.3 3.33
 -4 5 -3 3.24 2.93
 -3 5 -4 274.28 12.29
 -2 5 -5 149.45 7.27
 -1 5 -6 394.08 16.34
 0 5 -7 173.07 6.05
 1 5 -8 373.69 11.85
 2 5 -9 60.74 5.17
 -4 4 -3 15.61 3.16
 -3 4 -4 68.96 4.63
 -2 4 -5 142.94 6.93
 -1 4 -6 181.66 8.28
 0 4 -7 242.36 7.76
 1 4 -8 89.51 4.23
 2 4 -9 49.25 4.69
 -4 3 -3 226.95 10.69
 -3 3 -4 39.13 3.54
 -2 3 -5 556.12 23.88
 -1 3 -6 46.89 2.2
 0 3 -7 457.08 13.73
 1 3 -8 15.73 2.1
 2 3 -9 88.79 6.45
 -3 2 -4 5.2 2.35
 -2 2 -5 6.18 2.46
 -1 2 -6 45.74 2.27
 0 2 -7 40.22 2.4
 1 2 -8 62.16 3.22
 2 2 -9 101.62 6.92
 -4 1 -3 118.6 6.7
 -3 1 -4 129.22 7.05
 -2 1 -5 303.98 13.3
 -1 1 -6 553.08 15.71
 0 1 -7 162.35 5.57
 1 1 -8 289.34 9.3
 2 1 -9 13.34 3.52
 -4 0 -3 -1.58 2.87
 -3 0 -4 110.95 6.21
 -2 0 -5 -1.87 1.97
 -1 0 -6 484.42 13.81
 0 0 -7 0.96 1.38
 1 0 -8 210.47 7.3
 2 0 -9 2.09 3.25
 -4 -1 -3 108.89 6.48
 -3 -1 -4 135.72 7.12
 -2 -1 -5 302.72 13.26
 -1 -1 -6 535.63 15.69
 0 -1 -7 157.27 5.53
 1 -1 -8 272.67 9.18
 2 -1 -9 27.67 3.99
 -4 -2 -3 29.16 3.84
 -3 -2 -4 4.28 2.54
 -2 -2 -5 3.71 2.15
 -1 -2 -6 50.91 2.34
 0 -2 -7 49.64 2.56
 1 -2 -8 54.32 3.13
 2 -2 -9 108.87 7.15
 -4 -3 -3 227.21 10.82
 -3 -3 -4 42.36 3.68
 -2 -3 -5 586.43 23.92
 -1 -3 -6 47.49 2.37
 0 -3 -7 449.08 13.7
 1 -3 -8 16.91 3.08
 2 -3 -9 88.55 6.45
 -4 -4 -3 25.94 3.56
 -3 -4 -4 58.07 4.38
 -2 -4 -5 138.62 4.86
 -1 -4 -6 181.39 5.81
 0 -4 -7 239.07 7.7
 1 -4 -8 106.22 6.33
 2 -4 -9 39.79 4.65
 -4 -5 -3 2.29 2.84
 -3 -5 -4 257.98 12.24
 -2 -5 -5 152.73 5.19
 -1 -5 -6 385 11.73
 0 -5 -7 177.06 6.01
 1 -5 -8 358.81 17.39
 2 -5 -9 54.74 5.33
 -4 -6 -3 6.99 2.98
 -3 -6 -4 44.33 3.93
 -2 -6 -5 5.64 1.52
 -1 -6 -6 83.32 3.27
 0 -6 -7 127.16 4.67
 1 -6 -8 135.22 7.63
 2 -6 -9 6.91 3.43
 -4 -7 -3 78.86 5.38
 -3 -7 -4 441.9 19.21
 -2 -7 -5 40.29 3.35
 -1 -7 -6 459.45 13.67
 0 -7 -7 84.84 3.5
 1 -7 -8 89.73 6.21
 2 -7 -9 6.51 3.48
 -4 -8 -3 4.94 2.97
 -3 -8 -4 8.36 2.61
 -2 -8 -5 361.36 10.69
 -1 -8 -6 32.41 2.07
 0 -8 -7 175.46 5.95
 1 -8 -8 9.42 2.92
 2 -8 -9 75.85 6.15
 -4 -9 -3 119.24 7.07
 -3 -9 -4 9.2 2.72
 -2 -9 -5 321.67 10.04
 -1 -9 -6 90.41 3.65
 0 -9 -7 625.05 18.07
 1 -9 -8 14.29 3.22
 2 -9 -9 241.17 13.49
 -4 -10 -3 20.74 3.48
 -3 -10 -4 26.34 2.46
 -2 -10 -5 139.91 5.22
 -1 -10 -6 27.03 1.93
 0 -10 -7 254.1 8.26
 1 -10 -8 14.05 3.2
 2 -10 -9 39.73 4.96
 -4 -11 -3 38.25 4.18
 -3 -11 -4 412.44 13.17
 -2 -11 -5 232.2 7.71
 -1 -11 -6 163.92 5.66
 0 -11 -7 50.28 2.75
 1 -11 -8 82.45 6.07
 2 -11 -9 61.55 5.73
 -4 -12 -3 25.95 3.74
 -3 -12 -4 115.64 4.87
 -2 -12 -5 78.63 3.51
 -1 -12 -6 129.31 4.76
 0 -12 -7 1.94 1.49
 1 -12 -8 53.99 4.97
 2 -12 -9 -0.16 3.57
 -4 -13 -3 8.48 3.32
 -3 -13 -4 159.85 6.18
 -2 -13 -5 4.34 1.77
 -1 -13 -6 478.27 14
 0 -13 -7 90.39 5.99
 1 -13 -8 234.48 12.85
 2 -13 -9 56.53 5.75
 -4 -14 -3 16.76 3.67
 -3 -14 -4 36.57 4.33
 -2 -14 -5 45.61 2.8
 -1 -14 -6 245.11 8.14
 0 -14 -7 56.3 4.56
 1 -14 -8 34.65 4.21
 2 -14 -9 49.34 5.42
 -3 -15 -4 5.92 3.06
 -2 -15 -5 312.57 10.19
 -1 -15 -6 16.12 1.97
 0 -15 -7 124.42 7.99
 1 -15 -8 14.18 3.36
 2 -15 -9 85.94 7.14
 -3 -16 -4 9.8 3.52
 -2 -16 -5 28.45 2.5
 -1 -16 -6 32.64 2.43
 0 -16 -7 38.34 4.27
 1 -16 -8 7.17 3.12
 2 -16 -9 87.49 7.07
 -3 -17 -4 25.33 4.19
 -2 -17 -5 166.46 9.62
 -1 -17 -6 209.1 7.24
 0 -17 -7 138.81 8.52
 1 -17 -8 177.37 10.29
 2 -17 -9 21.02 4.74
 -3 -18 -4 87.28 6.52
 -2 -18 -5 47.69 4.75
 -1 -18 -6 130.27 5.05
 0 -18 -7 6.61 3.27
 1 -18 -8 79.64 6.5
 2 -18 -9 3.17 3.95
 -3 -19 -4 190.79 11.39
 -2 -19 -5 61.79 5.49
 -1 -19 -6 167.04 6.18
 0 -19 -7 3.97 3.26
 1 -19 -8 139.84 9.12
 2 -19 -9 0.46 4.04
 -3 -20 -4 17.45 3.96
 -2 -20 -5 1.57 3.11
 -1 -20 -6 3.41 1.89
 0 -20 -7 37.54 4.73
 1 -20 -8 71.32 6.23
 -3 -21 -4 67.2 6.17
 -2 -21 -5 134.3 8.87
 -1 -21 -6 4.28 1.98
 0 -21 -7 276.92 14.76
 1 -21 -8 -1.29 3.57
 -3 -22 -4 2.65 3.57
 -2 -22 -5 139.59 8.93
 -1 -22 -6 4.51 2.06
 0 -22 -7 64.64 6.13
 1 -22 -8 24.44 4.63
 -3 -23 -4 86.35 7.28
 -2 -23 -5 71 6.41
 -1 -23 -6 94.98 7.33
 0 -23 -7 158.58 9.97
 1 -23 -8 17.08 4.36
 -3 -24 -4 11.68 4.23
 -2 -24 -5 6.97 3.96
 -1 -24 -6 18.33 4.24
 0 -24 -7 5.3 3.94
 1 -24 -8 91.4 7.54
 -3 -25 -4 133.07 9.43
 -2 -25 -5 6.45 3.78
 -1 -25 -6 131.81 8.98
 0 -25 -7 33.4 5.1
 1 -25 -8 72.71 6.88
 -2 -26 -5 18.21 4.21
 -1 -26 -6 39.26 5.29
 0 -26 -7 68.71 6.7
 -2 -27 -5 120.28 8.98
 -1 -27 -6 42.23 5.63
 0 -27 -7 87.2 7.79
 -2 -28 -5 13.14 4.43
 -1 -28 -6 5.17 4.36
 0 -28 -7 58.37 6.41
 -1 -29 -6 100.14 8.36
 -2 27 -6 47.67 5.7
 -1 27 -7 122.9 8.63
 -2 26 -6 -3.59 3.91
 -1 26 -7 22.63 4.77
 0 26 -8 9.74 4.68
 -2 25 -6 91.1 6.85
 -1 25 -7 20.31 4.66
 0 25 -8 172.29 10.68
 -2 24 -6 14.09 4.07
 -1 24 -7 -0.76 3.79
 0 24 -8 1.09 4.34
 -3 23 -5 180.58 10.76
 -2 23 -6 87.87 6.42
 -1 23 -7 76.73 6.52
 0 23 -8 94.13 7.63
 -3 22 -5 -1.4 3.74
 -2 22 -6 15.81 2.58
 -1 22 -7 22.34 4.54
 0 22 -8 3.71 3.99
 1 22 -9 21.94 5.35
 -3 21 -5 220.1 11.84
 -2 21 -6 1.34 2.2
 -1 21 -7 156.94 9.35
 0 21 -8 16.76 4.35
 1 21 -9 162.86 10.59
 -3 20 -5 1.92 3.33
 -2 20 -6 17.24 2.56
 -1 20 -7 10.41 3.57
 0 20 -8 -1.63 3.46
 1 20 -9 1.66 4.23
 -3 19 -5 -3.88 2.24
 -2 19 -6 163.07 6.16
 -1 19 -7 31.94 4.38
 0 19 -8 141.46 8.94
 1 19 -9 42.12 5.62
 -3 18 -5 -0.5 2.01
 -2 18 -6 0.34 2.03
 -1 18 -7 5.96 3.26
 0 18 -8 51.73 5.32
 1 18 -9 1.27 4.05
 -3 17 -5 79.61 3.97
 -2 17 -6 220.06 7.46
 -1 17 -7 74.34 5.69
 0 17 -8 83.37 6.4
 1 17 -9 66 6.49
 -4 16 -4 5.38 3.77
 -3 16 -5 -0.68 1.95
 -2 16 -6 0.21 1.85
 -1 16 -7 15.37 3.53
 0 16 -8 16.01 3.82
 1 16 -9 12.69 4.21
 -3 15 -5 154.76 6.73
 -2 15 -6 19.02 3.16
 -1 15 -7 101.73 6.5
 0 15 -8 5.09 3.41
 1 15 -9 268.89 14.01
 -4 14 -4 0.35 3.49
 -3 14 -5 4.78 2.03
 -2 14 -6 35.07 3.8
 -1 14 -7 -1.93 2.71
 0 14 -8 7.96 3.21
 1 14 -9 16.22 4.11
 2 14 -10 3.97 3.85
 -4 13 -4 182.03 10.7
 -3 13 -5 74.83 5.33
 -2 13 -6 288.96 13.09
 -1 13 -7 -1.06 2.51
 0 13 -8 152.75 8.54
 1 13 -9 32.61 4.68
 2 13 -10 80.26 4.83
 -4 12 -4 17.3 3.75
 -3 12 -5 2.07 2.76
 -2 12 -6 4.57 2.72
 -1 12 -7 23.44 3.46
 0 12 -8 35.29 4.21
 1 12 -9 7.56 2.28
 2 12 -10 8.35 2.92
 -4 11 -4 29.45 4.16
 -3 11 -5 57.41 4.48
 -2 11 -6 45.97 3.95
 -1 11 -7 264.74 12.55
 0 11 -8 130.42 7.41
 1 11 -9 167.41 6.55
 2 11 -10 52.91 5.3
 -3 10 -5 21.75 3.2
 -2 10 -6 71.54 4.92
 -1 10 -7 12.03 2.96
 0 10 -8 4.15 2.9
 1 10 -9 8.33 2.23
 2 10 -10 16.64 3.96
 -4 9 -4 12.65 3.26
 -3 9 -5 555.93 22.33
 -2 9 -6 52.02 4.39
 -1 9 -7 251.41 11.92
 0 9 -8 29.41 3.72
 1 9 -9 230.47 8.34
 2 9 -10 2.22 3.33
 -4 8 -4 14.25 3.26
 -3 8 -5 27.94 3.52
 -2 8 -6 1.3 2.48
 -1 8 -7 46.36 4.14
 0 8 -8 13.7 3.19
 1 8 -9 4.82 2.07
 2 8 -10 5.18 3.47
 -4 7 -4 50.91 4.47
 -3 7 -5 6.44 2.8
 -2 7 -6 442.43 18.87
 -1 7 -7 2.31 2.38
 0 7 -8 895.97 36.37
 1 7 -9 2.2 2
 2 7 -10 104.36 7.07
 -4 6 -4 25.86 3.72
 -3 6 -5 49.72 4.13
 -2 6 -6 0.47 2.45
 -1 6 -7 16.72 3
 0 6 -8 16.35 2.08
 1 6 -9 46 3.07
 2 6 -10 5.98 3.57
 -4 5 -4 140.71 7.89
 -3 5 -5 285.04 13.09
 -2 5 -6 447.37 18.77
 -1 5 -7 411.91 17.22
 0 5 -8 424.59 13.1
 1 5 -9 80.46 3.96
 2 5 -10 130.23 8.15
 -4 4 -4 5.7 3.11
 -3 4 -5 89.76 5.83
 -2 4 -6 130.66 6.96
 -1 4 -7 20.21 3.21
 0 4 -8 12.08 1.89
 1 4 -9 57.19 3.36
 2 4 -10 -0.92 3.19
 -4 3 -4 8.27 3.07
 -3 3 -5 274.92 12.25
 -2 3 -6 60.07 4.27
 -1 3 -7 1585.23 61.28
 0 3 -8 304.15 9.69
 1 3 -9 341 11.03
 2 3 -10 6.28 3.62
 -4 2 -4 7.48 3.24
 -3 2 -5 12.29 3.01
 -2 2 -6 22.15 3.08
 -1 2 -7 32.4 3.42
 0 2 -8 57.13 3.04
 1 2 -9 7.21 2.08
 2 2 -10 6.66 3.71
 -4 1 -4 227.43 10.85
 -3 1 -5 24.98 3.34
 -2 1 -6 877.65 34.58
 -1 1 -7 789.84 32.7
 0 1 -8 629.07 18.43
 1 1 -9 144.78 5.67
 2 1 -10 121.56 7.8
 -4 0 -4 12.27 3.49
 -3 0 -5 2.82 2.49
 -2 0 -6 363.65 16.37
 -1 0 -7 -4.12 2.31
 0 0 -8 87.16 3.74
 1 0 -9 3.61 2.73
 2 0 -10 14.58 3.73
 -4 -1 -4 218.47 10.79
 -3 -1 -5 17.13 3.01
 -2 -1 -6 861.82 34.53
 -1 -1 -7 852.53 23.94
 0 -1 -8 619.53 18.39
 1 -1 -9 142.64 8.21
 2 -1 -10 115.47 7.77
 -4 -2 -4 22.15 3.62
 -3 -2 -5 14.55 2.92
 -2 -2 -6 26.47 3.06
 -1 -2 -7 41 2.43
 0 -2 -8 63.29 3.11
 1 -2 -9 14 3.28
 2 -2 -10 4.93 3.49
 -4 -3 -4 7.33 2.96
 -3 -3 -5 264.71 12.2
 -2 -3 -6 59.99 4.12
 -1 -3 -7 1590.86 44.88
 0 -3 -8 302.31 9.61
 1 -3 -9 352.43 16.21
 2 -3 -10 6.06 3.41
 -4 -4 -4 2.86 2.89
 -3 -4 -5 96.89 5.88
 -2 -4 -6 138.8 6.91
 -1 -4 -7 36.04 2.16
 0 -4 -8 21.09 2.12
 1 -4 -9 52.85 4.86
 2 -4 -10 5.74 3.48
 -4 -5 -4 153.09 8.17
 -3 -5 -5 292.44 13.16
 -2 -5 -6 445.01 18.67
 -1 -5 -7 423.72 12.37
 0 -5 -8 420.49 13.05
 1 -5 -9 81.64 5.72
 2 -5 -10 131.34 8.48
 -4 -6 -4 32.36 3.89
 -3 -6 -5 48.88 4.15
 -2 -6 -6 4.56 2.34
 -1 -6 -7 22.41 1.92
 1 -6 -9 47.55 4.51
 2 -6 -10 5.07 3.73
 -4 -7 -4 48.16 4.62
 -3 -7 -5 8.42 2.84
 -2 -7 -6 450.17 18.76
 -1 -7 -7 3.93 1.53
 0 -7 -8 925.34 26.31
 1 -7 -9 6.77 3.14
 2 -7 -10 98.24 7.37
 -4 -8 -4 16.08 3.34
 -3 -8 -5 24.71 3.48
 -2 -8 -6 7.32 1.74
 -1 -8 -7 60.46 2.82
 0 -8 -8 9.94 1.81
 1 -8 -9 8.64 3.14
 2 -8 -10 1.29 3.71
 -4 -9 -4 8.32 3.07
 -3 -9 -5 527.66 22.3
 -2 -9 -6 67.72 3.15
 -1 -9 -7 273.65 8.42
 0 -9 -8 26.43 2.18
 1 -9 -9 229.62 12.1
 2 -9 -10 -4.06 3.32
 -4 -10 -4 4.16 3.1
 -3 -10 -5 24.28 3.46
 -2 -10 -6 70.13 3.33
 -1 -10 -7 15.61 1.87
 0 -10 -8 4.71 2.46
 1 -10 -9 7.84 3.27
 2 -10 -10 11.28 4.02
 -4 -11 -4 36.93 4.17
 -3 -11 -5 45.39 4.21
 -2 -11 -6 49 2.81
 -1 -11 -7 281.37 8.8
 0 -11 -8 128.47 7.24
 1 -11 -9 170.57 9.63
 2 -11 -10 44.76 5.5
 -4 -12 -4 19.86 3.78
 -3 -12 -5 0.99 2.54
 -2 -12 -6 9.3 1.91
 -1 -12 -7 21.23 2.05
 0 -12 -8 35.85 3.78
 1 -12 -9 4.25 3.38
 2 -12 -10 11.88 4.3
 -4 -13 -4 206.4 10.6
 -3 -13 -5 77.46 5.4
 -2 -13 -6 293.32 9.45
 -1 -13 -7 2.76 1.66
 0 -13 -8 150.14 8.45
 1 -13 -9 30.38 4.29
 2 -13 -10 76.99 6.71
 -4 -14 -4 7.34 3.43
 -3 -14 -5 4.66 2.87
 -2 -14 -6 34.9 2.63
 -1 -14 -7 1.16 1.72
 0 -14 -8 10.67 3.07
 1 -14 -9 8.53 3.62
 -4 -15 -4 7.11 3.51
 -3 -15 -5 134.93 7.73
 -2 -15 -6 15.65 2.14
 -1 -15 -7 97.33 4.16
 0 -15 -8 1.63 2.74
 1 -15 -9 268.65 14.14
 -4 -16 -4 -1.38 3.38
 -3 -16 -5 1.81 2.2
 -2 -16 -6 -3.05 1.75
 -1 -16 -7 10.5 1.98
 0 -16 -8 9.77 3.12
 1 -16 -9 7.81 3.51
 -4 -17 -4 128.36 8.16
 -3 -17 -5 69.03 4.06
 -2 -17 -6 204.36 7.54
 -1 -17 -7 75.56 3.67
 0 -17 -8 81.92 6.23
 1 -17 -9 69.62 6.08
 -3 -18 -5 0.63 2.19
 -2 -18 -6 -1.18 1.98
 -1 -18 -7 9.02 2.1
 0 -18 -8 44.45 4.77
 1 -18 -9 4.8 3.59
 -3 -19 -5 0.74 2.27
 -2 -19 -6 151.56 6.19
 -1 -19 -7 35.79 2.8
 0 -19 -8 142.5 8.83
 1 -19 -9 38.74 5.04
 -3 -20 -5 0.26 2.35
 -2 -20 -6 17.43 2.51
 -1 -20 -7 6.57 3.69
 0 -20 -8 3.98 3.38
 1 -20 -9 -0.11 3.57
 -3 -21 -5 218.29 8.42
 -2 -21 -6 -0.07 2.15
 -1 -21 -7 166.71 9.97
 0 -21 -8 13.35 3.94
 1 -21 -9 168.04 10.41
 -3 -22 -5 3.7 3.83
 -2 -22 -6 15.86 2.59
 -1 -22 -7 29.16 4.69
 0 -22 -8 -2.13 3.64
 1 -22 -9 12.61 4.38
 -3 -23 -5 192.07 11.58
 -2 -23 -6 70.63 4.14
 -1 -23 -7 77.74 6.89
 0 -23 -8 92.38 7.48
 -2 -24 -6 11.02 2.59
 -1 -24 -7 -1.66 3.97
 0 -24 -8 4.07 4.02
 -2 -25 -6 87.78 4.68
 -1 -25 -7 22.47 4.74
 0 -25 -8 171.42 10.77
 -2 -26 -6 1.99 2.54
 -1 -26 -7 22.17 5.08
 0 -26 -8 6.06 4.36
 -2 -27 -6 51.25 3.86
 -1 -27 -7 102.68 8.64
 -1 25 -8 73.13 6.75
 -2 24 -7 2.64 3.91
 -1 24 -8 82.11 6.97
 -2 23 -7 26.58 4.78
 -1 23 -8 11.64 4.38
 0 23 -9 55.12 6.49
 -2 22 -7 7.22 3.76
 -1 22 -8 2.49 4.07
 0 22 -9 39.1 5.59
 -3 21 -6 32.05 3.21
 -2 21 -7 120.93 7.68
 -1 21 -8 -2.14 3.79
 0 21 -9 102.16 7.88
 -3 20 -6 101.01 4.94
 -2 20 -7 64.32 5.58
 -1 20 -8 67.95 6.03
 0 20 -9 19.35 4.75
 -3 19 -6 93.6 4.71
 -2 19 -7 1.97 2.22
 -1 19 -8 35.84 4.87
 0 19 -9 1.91 3.89
 -3 18 -6 58.54 3.66
 -2 18 -7 2.61 2.14
 -1 18 -8 21.31 4.21
 0 18 -9 35.88 5.09
 1 18 -10 43.81 6.02
 -3 17 -6 15.67 2.42
 -2 17 -7 129.84 5.47
 -1 17 -8 146.98 8.44
 0 17 -9 84.77 6.99
 1 17 -10 69.81 7.04
 -3 16 -6 -0.17 2.08
 -2 16 -7 183.46 9.57
 -1 16 -8 0.22 3.14
 0 16 -9 132.97 8.65
 1 16 -10 6.56 4.42
 -3 15 -6 7.39 2.16
 -2 15 -7 142.56 8.09
 -1 15 -8 24.75 4.04
 0 15 -9 69.36 5.99
 1 15 -10 17.57 4.8
 -4 14 -5 45.77 5.06
 -3 14 -6 17.68 3.38
 -2 14 -7 100.81 6.58
 -1 14 -8 35.54 4.28
 0 14 -9 37.47 4.75
 1 14 -10 36.2 5.44
 -4 13 -5 7.34 3.42
 -3 13 -6 101.52 6.4
 -2 13 -7 22.72 3.61
 -1 13 -8 396.25 17.69
 0 13 -9 34.38 4.51
 1 13 -10 193.31 11.2
 -3 12 -6 88.76 5.98
 -2 12 -7 75.05 5.49
 -1 12 -8 179.25 9.64
 0 12 -9 6.04 3.27
 1 12 -10 135.34 8.73
 -4 11 -5 82.63 5.89
 -3 11 -6 176.71 9.07
 -2 11 -7 89.37 5.84
 -1 11 -8 120.58 7.24
 0 11 -9 90.75 6.46
 1 11 -10 61.66 6.2
 -4 10 -5 55.41 4.94
 -3 10 -6 49.92 4.49
 -2 10 -7 184.23 9.25
 -1 10 -8 79.99 5.49
 0 10 -9 73.89 5.76
 1 10 -10 36.13 4.98
 -4 9 -5 93.35 6.44
 -3 9 -6 55.09 4.43
 -2 9 -7 235.58 11.23
 -1 9 -8 25.93 3.73
 0 9 -9 453.51 19.87
 1 9 -10 3.78 3.6
 -4 8 -5 122.27 7.27
 -3 8 -6 27.27 3.82
 -2 8 -7 37.49 3.79
 -1 8 -8 124.65 7.36
 0 8 -9 122.03 7.79
 1 8 -10 8.24 2.29
 -4 7 -5 11.62 3.49
 -3 7 -6 169.19 8.84
 -2 7 -7 78.82 5.33
 -1 7 -8 262 12.12
 0 7 -9 40.86 4.37
 1 7 -10 54.57 3.5
 -4 6 -5 -1.36 2.88
 -3 6 -6 140.45 7.97
 -2 6 -7 6.68 2.61
 -1 6 -8 303.95 14.14
 0 6 -9 74.3 5.65
 1 6 -10 72.34 4.03
 -4 5 -5 7.39 3.25
 -3 5 -6 219.27 10.69
 -2 5 -7 -0.54 2.34
 -1 5 -8 221.82 10.69
 0 5 -9 97.11 6.26
 1 5 -10 257.8 8.81
 -4 4 -5 68.78 5.36
 -3 4 -6 40.08 4.05
 -2 4 -7 91.23 5.63
 -1 4 -8 2.51 2.57
 0 4 -9 41.81 4.11
 1 4 -10 34.67 3.06
 -4 3 -5 71.9 5.52
 -3 3 -6 6.01 2.75
 -2 3 -7 170.58 8.61
 -1 3 -8 18.18 3.12
 0 3 -9 165.77 8.97
 1 3 -10 20.3 3.54
 2 3 -11 43.06 5.09
 -4 2 -5 67.86 5.45
 -3 2 -6 52.35 4.31
 -2 2 -7 154.96 8.31
 -1 2 -8 56.25 4.27
 0 2 -9 215.75 7.46
 1 2 -10 3.59 3.01
 2 2 -11 8.68 3.73
 -4 1 -5 56.84 4.94
 -3 1 -6 16.4 3.21
 -2 1 -7 167.1 8.73
 -1 1 -8 67.86 4.61
 0 1 -9 67.07 3.52
 1 1 -10 138.45 7.57
 2 1 -11 16.23 4.27
 -4 0 -5 1.19 3.25
 -3 0 -6 115.02 6.76
 -2 0 -7 -2.23 2.29
 -1 0 -8 33.39 3.33
 0 0 -9 5.23 1.92
 1 0 -10 25.83 3.75
 2 0 -11 -1.84 3.45
 -4 -1 -5 55.22 4.99
 -3 -1 -6 20.53 3.27
 -2 -1 -7 183.44 8.83
 -1 -1 -8 63.07 4.45
 0 -1 -9 77.29 3.61
 1 -1 -10 118.75 7.42
 2 -1 -11 17.64 4.31
 -4 -2 -5 76 5.56
 -3 -2 -6 44.97 4.23
 -2 -2 -7 168.51 8.4
 -1 -2 -8 52.71 4.11
 0 -2 -9 217.51 7.47
 1 -2 -10 3.57 3.22
 2 -2 -11 3.4 3.75
 -4 -3 -5 73.62 5.6
 -2 -3 -7 172.49 8.51
 -1 -3 -8 22.98 2.85
 0 -3 -9 178.13 6.37
 1 -3 -10 13.73 3.43
 2 -3 -11 41.16 5.04
 -4 -4 -5 64.3 5.34
 -3 -4 -6 41.91 4.13
 -2 -4 -7 86.88 5.4
 -1 -4 -8 10.52 2.5
 0 -4 -9 43.67 2.81
 1 -4 -10 41.1 4.5
 -4 -5 -5 6.78 3.24
 -3 -5 -6 212.94 10.67
 -2 -5 -7 3.48 2.4
 -1 -5 -8 243.36 7.58
 0 -5 -9 96.86 4.15
 1 -5 -10 256.91 12.81
 -4 -6 -5 -3.1 2.92
 -3 -6 -6 165.94 8.2
 -2 -6 -7 6.17 2.55
 -1 -6 -8 320.13 10.06
 0 -6 -9 79.92 3.79
 1 -6 -10 66.25 5.79
 -4 -7 -5 8.86 3.5
 -3 -7 -6 161.04 8.74
 -2 -7 -7 78.5 5.06
 -1 -7 -8 258.97 8.42
 0 -7 -9 39.91 2.83
 1 -7 -10 52.28 5.01
 -4 -8 -5 110.83 7.26
 -3 -8 -6 29.53 3.68
 -2 -8 -7 38.76 3.63
 -1 -8 -8 133.57 4.98
 0 -8 -9 149.29 7.97
 1 -8 -10 7.33 3.33
 -4 -9 -5 95.9 6.59
 -3 -9 -6 49.99 4.46
 -2 -9 -7 230.73 10.83
 -1 -9 -8 25.49 2.17
 0 -9 -9 442.8 20.71
 1 -9 -10 6.43 3.57
 -4 -10 -5 55.76 5.07
 -3 -10 -6 52.06 4.59
 -2 -10 -7 186.65 8.98
 -1 -10 -8 77.55 3.5
 0 -10 -9 67.95 5.21
 1 -10 -10 42.31 4.79
 -4 -11 -5 87.54 6.26
 -3 -11 -6 166.11 9.01
 -2 -11 -7 92.53 5.63
 -1 -11 -8 125.22 4.77
 0 -11 -9 86.11 5.93
 1 -11 -10 72.48 6.13
 -4 -12 -5 3.24 3.48
 -3 -12 -6 94.65 5.91
 -2 -12 -7 81.76 3.84
 -1 -12 -8 183.88 6.58
 0 -12 -9 7.17 3.03
 1 -12 -10 129.91 8.44
 -4 -13 -5 7.43 3.61
 -3 -13 -6 104.06 6.46
 -2 -13 -7 28.53 3.37
 -1 -13 -8 401.16 12.41
 0 -13 -9 30.52 3.9
 1 -13 -10 187.95 11.06
 -4 -14 -5 48.85 5.02
 -3 -14 -6 20.46 3.58
 -2 -14 -7 114.97 4.7
 -1 -14 -8 31.44 2.62
 0 -14 -9 38.85 4.19
 1 -14 -10 46.98 5.24
 -3 -15 -6 4.05 3.03
 -2 -15 -7 143.36 5.68
 -1 -15 -8 23.06 2.36
 0 -15 -9 61.52 5.38
 1 -15 -10 19.32 4.32
 -3 -16 -6 1.99 2.89
 -2 -16 -7 178.05 6.69
 -1 -16 -8 2.15 1.92
 0 -16 -9 145.28 8.43
 1 -16 -10 19.51 4.17
 -3 -17 -6 9.22 3.12
 -2 -17 -7 143.77 5.63
 -1 -17 -8 135.85 5.41
 0 -17 -9 92.32 6.75
 1 -17 -10 68.58 6.31
 -3 -18 -6 51.41 4.83
 -2 -18 -7 3.35 2.16
 -1 -18 -8 24.72 4.01
 0 -18 -9 33.16 4.49
 1 -18 -10 36.14 5.22
 -3 -19 -6 81.51 6.26
 -2 -19 -7 1.39 2.13
 -1 -19 -8 40.25 4.74
 0 -19 -9 3.1 3.63
 -3 -20 -6 89.3 6.68
 -2 -20 -7 58.08 3.62
 -1 -20 -8 64.94 5.93
 0 -20 -9 20.54 4.38
 -3 -21 -6 35.74 4.55
 -2 -21 -7 109.5 5.18
 -1 -21 -8 3.64 3.76
 0 -21 -9 89.89 7.42
 -2 -22 -7 4.41 2.35
 -1 -22 -8 3.2 3.93
 0 -22 -9 51.73 5.67
 -2 -23 -7 25.92 2.98
 -1 -23 -8 20.74 4.69
 0 -23 -9 45.23 5.76
 -2 -24 -7 3.06 2.4
 -1 -24 -8 75.58 6.94
 -1 -25 -8 60.26 6.66
 -1 22 -9 161.55 10.21
 -2 21 -8 -5.82 3.57
 -1 21 -9 11.43 4.57
 -2 20 -8 37.92 4.98
 -1 20 -9 57.07 6.11
 -2 19 -8 9.84 3.97
 -1 19 -9 14.15 4.26
 0 19 -10 8.89 4.76
 -3 18 -7 4.74 2.49
 -2 18 -8 193.74 10.5
 -1 18 -9 21.22 4.35
 0 18 -10 136.9 9.67
 -3 17 -7 3.38 2.33
 -2 17 -8 40.77 4.75
 -1 17 -9 4.87 3.78
 0 17 -10 8.89 4.25
 -3 16 -7 75.8 4.21
 -2 16 -8 53.03 5.2
 -1 16 -9 76.29 6.4
 0 16 -10 15.15 4.37
 -3 15 -7 -1.43 3.19
 -2 15 -8 -3.6 3.09
 -1 15 -9 4.73 3.74
 0 15 -10 5.46 4.09
 -3 14 -7 81.57 5.96
 -2 14 -8 131.41 7.79
 -1 14 -9 73.7 6.11
 0 14 -10 87.07 7.06
 -3 13 -7 10.63 3.34
 -2 13 -8 13.26 3.5
 -1 13 -9 3.55 3.4
 0 13 -10 5.46 3.81
 -3 12 -7 3.11 3.09
 -2 12 -8 119.99 7.56
 -1 12 -9 4.8 3.31
 0 12 -10 143.71 8.98
 1 12 -11 9.85 4.61
 -3 11 -7 -0.53 3.15
 -2 11 -8 -3.01 2.92
 -1 11 -9 9.16 3.4
 0 11 -10 10.73 3.77
 1 11 -11 26.12 4.92
 -4 10 -6 -4.73 2.96
 -3 10 -7 202.08 10.53
 -2 10 -8 -0.39 2.88
 -1 10 -9 222.54 11.27
 0 10 -10 3.47 3.51
 1 10 -11 97.11 7.66
 -4 9 -6 4.32 3.36
 -3 9 -7 46.95 4.64
 -2 9 -8 0.76 2.92
 -1 9 -9 6.43 3.31
 0 9 -10 1.51 3.42
 1 9 -11 19.36 4.57
 -4 8 -6 82.06 6.25
 -3 8 -7 156.24 8.71
 -2 8 -8 59.87 4.85
 -1 8 -9 190.84 10.08
 0 8 -10 120.47 7.64
 1 8 -11 48.29 5.7
 -4 7 -6 8.87 3.72
 -3 7 -7 26.91 3.94
 -2 7 -8 27.15 3.81
 -1 7 -9 -1.87 2.87
 0 7 -10 97.24 6.79
 1 7 -11 0.78 4.04
 -4 6 -6 156.51 8.83
 -3 6 -7 89.45 6.27
 -2 6 -8 209.06 10.58
 -1 6 -9 50.97 4.72
 0 6 -10 230.82 12.12
 -4 5 -6 28.48 4.32
 -3 5 -7 36.23 4.31
 -2 5 -8 10.68 3.22
 -1 5 -9 2.84 3.02
 0 5 -10 60.39 5.36
 -4 4 -6 14.12 3.72
 -3 4 -7 324 14.59
 -2 4 -8 164.97 8.59
 -1 4 -9 459.28 20.1
 0 4 -10 22.82 3.96
 -4 3 -6 3.1 3.21
 -3 3 -7 7.94 3.2
 -2 3 -8 33.13 3.86
 -1 3 -9 100.74 6.18
 0 3 -10 39.96 4.41
 1 3 -11 72.26 5.86
 -4 2 -6 86.3 6.24
 -3 2 -7 97.81 6.37
 -2 2 -8 178.97 8.97
 -1 2 -9 311.49 13.69
 0 2 -10 132.77 7.73
 1 2 -11 119.17 7.58
 -4 1 -6 46.14 4.95
 -3 1 -7 5.9 3.04
 -2 1 -8 16.55 3.3
 -1 1 -9 87.77 6.21
 0 1 -10 87.33 5.95
 1 1 -11 29.5 4.32
 -4 0 -6 240.3 12.04
 -3 0 -7 -0.34 2.81
 -2 0 -8 783.99 31.45
 -1 0 -9 2.2 2.6
 0 0 -10 406.3 17.73
 1 0 -11 -0.66 2.9
 -4 -1 -6 49.75 5.11
 -3 -1 -7 1.67 2.99
 -2 -1 -8 21.05 3.33
 -1 -1 -9 118.96 6.48
 0 -1 -10 69.13 5.55
 1 -1 -11 31.75 4.27
 -4 -2 -6 85.57 6.23
 -3 -2 -7 103.65 6.5
 -2 -2 -8 181.46 8.86
 -1 -2 -9 283.11 13.35
 0 -2 -10 130.55 7.5
 1 -2 -11 118.5 7.67
 -4 -3 -6 2.39 3.35
 -3 -3 -7 7.24 3.15
 -2 -3 -8 48.44 4.02
 -1 -3 -9 94.23 5.74
 0 -3 -10 33.3 2.82
 1 -3 -11 72.79 6.03
 -4 -4 -6 18.49 3.91
 -3 -4 -7 330.03 14.6
 -2 -4 -8 165.35 8.47
 -1 -4 -9 468.18 19.89
 0 -4 -10 24.92 2.65
 1 -4 -11 143.92 8.74
 -4 -5 -6 20.98 4.14
 -3 -5 -7 43.83 4.35
 -2 -5 -8 18.56 3.14
 -1 -5 -9 6.64 2.85
 0 -5 -10 59.23 4.97
 1 -5 -11 21.63 4.21
 -4 -6 -6 168.33 9.04
 -3 -6 -7 94.7 6.16
 -2 -6 -8 213.99 10.37
 -1 -6 -9 48.83 4.16
 0 -6 -10 263.63 12.45
 1 -6 -11 9.05 3.72
 -4 -7 -6 14.79 3.88
 -3 -7 -7 30.28 3.92
 -2 -7 -8 26.42 3.36
 -1 -7 -9 5.89 2.65
 0 -7 -10 96.43 6.4
 1 -7 -11 3.47 3.54
 -4 -8 -6 88.69 6.5
 -3 -8 -7 159.47 8.71
 -2 -8 -8 54.76 4.5
 -1 -8 -9 199.87 9.52
 0 -8 -10 111.04 7.32
 1 -8 -11 56.2 5.56
 -4 -9 -6 5.5 3.5
 -3 -9 -7 43.87 4.5
 -2 -9 -8 8.74 2.75
 -1 -9 -9 9 2.71
 0 -9 -10 2.07 3.21
 1 -9 -11 13.36 4.11
 -4 -10 -6 0.05 3.36
 -3 -10 -7 208.33 10.46
 -2 -10 -8 1.43 2.52
 -1 -10 -9 218.1 7.58
 0 -10 -10 3.07 3.22
 1 -10 -11 94.96 7.2
 -3 -11 -7 9.57 3.32
 -2 -11 -8 1.94 2.71
 -1 -11 -9 3.76 1.86
 0 -11 -10 10.94 3.41
 1 -11 -11 24.22 4.36
 -3 -12 -7 0.13 2.92
 -2 -12 -8 138.27 7.31
 -1 -12 -9 1.53 1.84
 0 -12 -10 144.94 8.66
 1 -12 -11 4.21 3.83
 -3 -13 -7 12.09 3.37
 -2 -13 -8 11.82 3.07
 -1 -13 -9 3.8 1.99
 0 -13 -10 5.52 3.36
 -3 -14 -7 78.84 5.79
 -2 -14 -8 130 7.36
 -1 -14 -9 67.87 3.67
 0 -14 -10 92.22 6.54
 -3 -15 -7 5.02 3.22
 -2 -15 -8 0.59 2.78
 -1 -15 -9 7.14 3.3
 0 -15 -10 0.08 3.01
 -3 -16 -7 77.23 5.95
 -2 -16 -8 52.13 4.53
 -1 -16 -9 78.22 6.12
 0 -16 -10 8.15 3.54
 -3 -17 -7 -0.2 3.31
 -2 -17 -8 30.35 3.9
 -1 -17 -9 6.69 3.32
 0 -17 -10 -2.62 3.16
 -3 -18 -7 3.05 3.34
 -2 -18 -8 189.47 7.24
 -1 -18 -9 15.04 4.04
 0 -18 -10 148.48 9.32
 -2 -19 -8 5.49 2.37
 -1 -19 -9 12.63 4.03
 0 -19 -10 6.71 3.71
 -2 -20 -8 45.07 3.38
 -1 -20 -9 53.04 5.68
 -2 -21 -8 -1.58 2.45
 -1 -21 -9 12.01 4.32
 -1 -22 -9 157.14 10.1
 -2 18 -9 0.18 3.76
 -2 17 -9 7.82 3.79
 -1 17 -10 4.46 4.19
 -2 16 -9 293.45 14.19
 -1 16 -10 22.94 4.77
 -2 15 -9 56.93 5.57
 -1 15 -10 -3.71 3.75
 -3 14 -8 29.05 4.37
 -2 14 -9 154.28 9.19
 -1 14 -10 66.5 6.11
 0 14 -11 92.53 7.75
 -3 13 -8 36.22 4.79
 -2 13 -9 9.52 3.73
 -1 13 -10 5.72 4
 0 13 -11 0.91 4.16
 -3 12 -8 114.3 7.48
 -2 12 -9 11.79 3.54
 -1 12 -10 263.35 13.19
 0 12 -11 3.49 4.05
 -3 11 -8 21.62 4.1
 -2 11 -9 14.74 3.79
 -1 11 -10 23.15 4.33
 0 11 -11 24.4 4.73
 -3 10 -8 53.38 5.21
 -2 10 -9 141.38 8.28
 -1 10 -10 103.93 7.04
 0 10 -11 142.28 9.24
 -3 9 -8 -1.16 3.29
 -2 9 -9 28.93 4.15
 -1 9 -10 -2.88 3.33
 0 9 -11 5.8 3.92
 -3 8 -8 33.74 4.55
 -2 8 -9 101.74 6.62
 -1 8 -10 40.34 4.7
 0 8 -11 176.09 9.98
 -3 7 -8 -3.57 3.13
 -2 7 -9 10.68 3.37
 -1 7 -10 54.93 5.25
 0 7 -11 1.9 3.83
 -3 6 -8 249.14 11.84
 -2 6 -9 10.71 3.51
 -1 6 -10 195.23 10.19
 0 6 -11 2.85 3.66
 -3 5 -8 10.35 3.64
 -2 5 -9 1.53 2.95
 -1 5 -10 22.6 4.06
 0 5 -11 2.09 3.65
 -3 4 -8 45.11 4.66
 -2 4 -9 42.1 4.34
 -1 4 -10 39.12 4.42
 0 4 -11 126.19 8.05
 -3 3 -8 28.11 4.03
 -2 3 -9 4.79 3.01
 -1 3 -10 1.55 3.33
 0 3 -11 58.98 5.6
 -3 2 -8 69.61 5.54
 -2 2 -9 176.42 9.13
 -1 2 -10 15.65 3.43
 0 2 -11 97.83 6.86
 -3 1 -8 7.26 3.26
 -2 1 -9 0.3 2.75
 -1 1 -10 17.21 3.39
 0 1 -11 16.13 3.98
 -3 0 -8 121.27 7.41
 -2 0 -9 2.3 2.94
 -1 0 -10 54.81 4.7
 0 0 -11 4.9 3.56
 -3 -1 -8 8.12 3.34
 -2 -1 -9 1.32 2.88
 -1 -1 -10 3.96 3.01
 0 -1 -11 22.19 4.16
 -3 -2 -8 68.23 5.4
 -2 -2 -9 171.89 9.04
 -1 -2 -10 22.19 3.42
 -3 -3 -8 32.06 4.18
 -2 -3 -9 2.08 2.79
 -1 -3 -10 3.03 2.91
 -3 -4 -8 43.03 4.59
 -2 -4 -9 38.09 4.03
 -1 -4 -10 38 4.06
 -3 -5 -8 10.75 3.39
 -2 -5 -9 -1.05 2.62
 -1 -5 -10 31.21 3.61
 -3 -6 -8 216.73 11.52
 -2 -6 -9 13.86 3.01
 -1 -6 -10 185.26 9.5
 -3 -7 -8 6.44 3.29
 -2 -7 -9 11.58 2.99
 -1 -7 -10 59.73 4.71
 -3 -8 -8 38.75 4.38
 -2 -8 -9 89.17 6.12
 -1 -8 -10 35.2 3.91
 -3 -9 -8 2.05 3.26
 -2 -9 -9 30.3 3.77
 -1 -9 -10 3.58 2.96
 0 -9 -11 3.09 3.41
 -3 -10 -8 56.27 5.06
 -2 -10 -9 126.37 7.58
 -1 -10 -10 88.37 6.07
 0 -10 -11 149.89 8.99
 -3 -11 -8 30.69 4.13
 -2 -11 -9 14.3 3.25
 -1 -11 -10 27.82 3.75
 0 -11 -11 15.9 4.17
 -3 -12 -8 113.95 7.31
 -2 -12 -9 13.26 3.43
 0 -12 -11 4.49 3.71
 -3 -13 -8 41.45 4.78
 -2 -13 -9 15.09 3.33
 0 -13 -11 1.29 3.68
 -3 -14 -8 26.59 4.19
 -2 -14 -9 163.56 8.67
 -2 -15 -9 45.03 4.73
 -2 -16 -9 278.88 13.24
 -1 -16 -10 14.68 3.83
 -2 -17 -9 11.52 3.62
 -1 -17 -10 0.34 3.36
 -2 -18 -9 2.26 3.28
 -2 12 -10 83.59 6.63
 -2 11 -10 132.26 8.74
 -1 11 -11 35.54 5.17
 -2 10 -10 4.65 3.7
 -1 10 -11 87.29 7.16
 -2 9 -10 7.25 3.81
 -1 9 -11 135.47 8.72
 -3 8 -9 46.07 5.25
 -2 8 -10 10.25 3.92
 -1 8 -11 161.36 9.54
 -3 7 -9 36.24 4.82
 -2 7 -10 96.52 6.85
 -1 7 -11 33.18 4.93
 -3 6 -9 21.64 4.24
 -2 6 -10 53.41 5.11
 -1 6 -11 1.28 3.67
 -3 5 -9 1.99 3.61
 -2 5 -10 84.83 6.57
 -1 5 -11 25.19 4.38
 -3 4 -9 60.66 5.55
 -2 4 -10 59.17 5.5
 -1 4 -11 70.59 5.68
 -3 3 -9 118.09 7.65
 -2 3 -10 -1.81 3.07
 -1 3 -11 110.03 7.21
 -3 2 -9 23.17 4.3
 -2 2 -10 10.55 3.46
 -1 2 -11 16.63 4.2
 -3 1 -9 56.76 5.39
 -2 1 -10 44.78 4.61
 -1 1 -11 23.34 4.3
 -3 0 -9 -0.76 3.43
 -2 0 -10 108.64 6.92
 -1 0 -11 1.45 3.44
 -3 -1 -9 56.71 5.22
 -2 -1 -10 43.93 4.48
 -1 -1 -11 21.49 3.88
 -3 -2 -9 27.02 4.22
 -2 -2 -10 10.27 3.26
 -1 -2 -11 15.12 3.64
 -2 -3 -10 1.1 2.97
 -1 -3 -11 94.62 6.58
 -2 -4 -10 63.42 5.21
 -1 -4 -11 52.68 4.89
 -3 -5 -9 4.64 3.31
 -2 -5 -10 92.44 6.33
 -1 -5 -11 16.71 3.69
 -3 -6 -9 17.05 3.99
 -2 -6 -10 51.84 4.76
 -1 -6 -11 2.59 3.12
 -3 -7 -9 45.57 4.93
 -2 -7 -10 94.18 6.36
 -1 -7 -11 29.33 4.07
 -3 -8 -9 52.17 5.15
 -2 -8 -10 11.05 3.39
 -1 -8 -11 159.2 8.78
 -2 -9 -10 3.54 3.18
 -2 -10 -10 1.64 2.9
 -2 -11 -10 148.42 8.37
 -2 -12 -10 76.62 5.89

_iucr_refine_fcf_details
;
data_let0507b
_computing_structure_refinement   'olex2.refine 1.5-alpha (Bourhis et al., 2015)'
_shelx_refln_list_code            4
loop_
  _space_group_symop_id
  _space_group_symop_operation_xyz
  1  x,y,z
  2  -x,y+1/2,-z+1/2
  3  -x,-y,-z
  4  x,-y-1/2,z-1/2

_space_group_crystal_system       monoclinic
_space_group_IT_number            14
_space_group_name_H-M_alt         'P 1 21/c 1'
_space_group_name_Hall            '-P 2ybc'
_symmetry_space_group_name_H-M    'P 1 21/c 1'
_symmetry_space_group_name_Hall   '-P 2ybc'
_symmetry_Int_Tables_number       14
_cell_length_a                    3.9773(3)
_cell_length_b                    28.477(2)
_cell_length_c                    9.5781(9)
_cell_angle_alpha                 90
_cell_angle_beta                  91.242(1)
_cell_angle_gamma                 90
_cell_volume                      1084.56(16)
loop_
  _refln_index_h
  _refln_index_k
  _refln_index_l
  _refln_F_squared_calc
  _refln_F_squared_meas
  _refln_F_squared_sigma
  _refln_F_squared_weight
  _refln_observed_status
-4 0 2 0.458 112.843 22.998 70.866 o
-4 0 4 1223.280 1328.690 51.716 5.790 o
-4 0 6 147.805 192.353 28.965 37.635 o
-4 1 1 136.422 149.753 11.245 121.176 o
-4 1 2 1641.980 1626.220 46.963 4.533 o
-4 1 3 56.234 51.423 10.629 219.643 o
-4 1 4 26.065 91.326 21.465 78.187 o
-4 1 5 42.400 55.874 12.226 193.363 o
-4 1 6 524.517 529.116 23.546 24.004 o
-4 1 7 152.054 151.299 15.860 84.930 o
-4 2 1 797.218 800.959 24.908 14.852 o
-4 2 2 0.510 32.685 24.519 66.667 o
-4 2 3 47.338 67.024 17.773 105.572 o
-4 2 4 436.813 440.504 18.781 32.945 o
-4 2 5 185.462 192.010 14.388 81.197 o
-4 2 6 95.649 109.706 14.498 115.906 o
-4 2 7 12.416 27.431 19.936 97.736 o
-4 3 1 1332.350 1403.060 48.275 5.604 o
-4 3 2 21.164 17.978 10.030 324.284 o
-4 3 3 362.756 361.055 31.591 24.323 o
-4 3 4 0.802 -0.951 11.288 320.359 o
-4 3 5 126.615 157.746 14.164 101.065 o
-4 3 6 6.339 14.145 12.890 231.169 o
-4 3 7 561.051 572.452 28.542 19.595 o
-4 4 1 113.427 176.990 16.842 84.622 o
-4 4 2 26.354 68.491 37.020 28.814 o
-4 4 3 846.488 933.193 38.768 10.330 o
-4 4 4 57.578 67.298 11.904 182.706 o
-4 4 5 575.716 575.650 22.387 22.591 o
-4 4 6 1.322 30.772 12.929 226.254 o
-4 4 7 0.879 22.985 14.042 197.617 o
-4 5 1 1554.810 1490.270 43.716 5.102 o
-4 5 2 1118.730 1104.470 30.826 8.982 o
-4 5 3 324.314 338.957 16.343 46.955 o
-4 5 4 14.137 74.898 30.214 42.827 o
-4 5 5 55.382 52.639 15.155 135.291 o
-4 5 6 781.963 781.012 27.372 14.535 o
-4 5 7 272.159 253.503 18.145 51.985 o
-4 6 1 8.844 50.274 19.900 96.475 o
-4 6 2 131.066 170.645 21.697 59.561 o
-4 6 3 32.990 37.468 11.243 238.881 o
-4 6 4 1543.620 1494.490 57.962 4.342 o
-4 6 5 1.176 3.058 11.529 303.527 o
-4 6 6 518.833 563.939 23.092 23.956 o
-4 6 7 23.090 38.258 14.072 174.810 o
-4 7 1 74.870 69.128 13.258 148.243 o
-4 7 2 1753.530 1890.570 66.969 3.273 o
-4 7 3 192.108 201.632 30.456 33.073 o
-4 7 4 93.163 169.176 15.848 96.570 o
-4 7 5 16.525 12.861 14.322 182.598 o
-4 7 6 303.774 307.059 18.119 46.791 o
-4 8 1 23.113 39.299 12.694 206.889 o
-4 8 2 60.157 104.599 49.750 15.909 o
-4 8 3 891.597 898.599 27.597 12.386 o
-4 8 4 537.076 556.666 24.171 22.861 o
-4 8 5 994.806 938.091 29.816 10.749 o
-4 8 6 259.113 258.224 18.397 52.410 o
-4 9 1 1081.170 1122.890 44.921 7.410 o
-4 9 2 14.140 18.691 16.756 136.403 o
-4 9 3 838.937 891.309 32.388 11.943 o
-4 9 4 2.845 24.957 12.475 243.359 o
-4 9 5 275.060 327.315 18.392 47.815 o
-4 9 6 47.530 52.393 13.845 159.253 o
-4 10 1 187.034 205.158 34.865 26.917 o
-4 10 2 259.681 255.409 17.624 54.432 o
-4 10 3 643.224 647.336 27.033 17.975 o
-4 10 4 379.853 367.901 22.426 33.438 o
-4 10 5 784.194 800.439 31.101 13.351 o
-4 10 6 168.407 155.602 15.872 81.099 o
-4 11 1 751.027 729.026 45.593 10.255 o
-4 11 2 647.245 632.192 26.880 18.107 o
-4 11 3 366.356 371.307 38.754 18.602 o
-4 11 4 72.909 103.231 15.837 111.732 o
-4 11 5 122.322 138.225 16.642 88.028 o
-4 11 6 152.857 161.862 15.991 82.958 o
-4 12 1 47.657 53.635 16.437 121.814 o
-4 12 2 122.139 162.157 19.930 68.394 o
-4 12 3 12.692 22.735 13.755 195.596 o
-4 12 4 789.434 793.553 31.861 13.125 o
-4 12 5 7.001 17.457 17.687 125.801 o
-4 12 6 276.287 302.547 18.995 47.510 o
-4 13 1 213.026 200.976 21.007 52.500 o
-4 13 2 439.048 420.904 27.307 25.263 o
-4 13 3 463.848 453.362 23.544 27.157 o
-4 13 4 36.986 39.390 15.767 137.453 o
-4 13 5 12.902 27.158 16.307 142.174 o
-4 14 1 249.452 190.039 21.674 48.152 o
-4 14 2 199.421 177.445 23.132 48.732 o
-4 14 3 92.961 88.733 16.271 103.997 o
-4 14 4 32.529 38.721 14.967 152.240 o
-4 14 5 436.539 465.997 22.016 29.287 o
-4 15 1 459.341 442.618 29.263 22.873 o
-4 15 2 168.509 152.215 21.419 57.724 o
-4 15 3 446.587 369.350 50.722 12.007 o
-4 15 4 41.850 46.478 15.087 143.773 o
-4 15 5 65.706 103.051 16.375 108.822 o
-4 16 1 113.684 138.871 20.819 66.915 o
-4 16 2 0.139 3.297 17.768 129.356 o
-4 16 3 436.176 365.956 27.197 26.265 o
-4 16 4 60.908 51.709 24.508 60.417 o
-4 17 1 176.751 181.152 23.286 49.883 o
-4 17 2 268.454 257.059 25.438 37.156 o
-4 17 3 84.197 95.515 20.445 75.683 o
-4 17 4 24.342 24.890 19.526 99.327 o
-4 18 1 33.149 21.286 19.257 100.336 o
-4 18 2 7.680 43.302 19.939 97.055 o
-4 18 3 263.280 290.865 34.295 24.857 o
-4 18 4 462.372 467.263 42.040 15.005 o
-4 19 1 4.441 11.564 19.482 105.711 o
-4 19 2 569.521 594.775 35.938 15.696 o
-4 19 3 1.950 7.977 19.847 102.870 o
-4 20 1 118.199 104.611 28.496 41.970 o
-4 20 2 74.221 74.029 21.484 72.704 o
-4 21 1 594.687 586.913 37.246 14.882 o
-3 0 2 1605.600 1586.510 68.289 3.648 o
-3 0 4 2079.000 1964.020 67.132 2.826 o
-3 0 6 67.626 134.493 17.730 92.925 o
-3 0 8 1068.920 1064.890 45.924 7.477 o
-3 1 1 1999.590 1955.170 39.736 3.690 o
-3 1 2 1811.540 1755.570 40.683 4.249 o
-3 1 3 191.290 212.931 34.780 26.835 o
-3 1 4 10.143 50.095 19.171 103.111 o
-3 1 5 212.297 200.544 12.756 81.782 o
-3 1 6 1686.710 1549.650 40.605 4.812 o
-3 1 7 203.343 191.860 14.242 78.264 o
-3 1 8 146.802 180.528 15.206 86.548 o
-3 1 9 30.912 57.839 14.649 153.410 o
-3 2 1 518.643 576.506 20.018 25.754 o
-3 2 2 39.541 81.353 16.616 117.813 o
-3 2 3 2919.440 2891.230 57.394 1.857 o
-3 2 4 82.434 76.911 8.667 218.483 o
-3 2 5 687.660 686.151 22.196 18.655 o
-3 2 6 47.346 97.687 17.526 103.896 o
-3 2 7 225.693 226.028 14.753 69.303 o
-3 2 8 737.862 682.067 24.901 16.762 o
-3 2 9 718.464 691.705 25.982 16.640 o
-3 3 1 4943.560 4919.740 91.346 0.706 o
-3 3 2 496.360 464.005 12.431 34.613 o
-3 3 3 161.827 228.067 14.216 83.186 o
-3 3 4 87.775 102.248 16.171 104.415 o
-3 3 5 1005.670 964.647 27.821 10.857 o
-3 3 6 118.963 109.965 11.815 132.758 o
-3 3 7 1004.120 996.343 30.338 10.331 o
-3 3 8 1.749 16.771 12.177 261.622 o
-3 3 9 22.012 75.004 14.375 158.302 o
-3 4 1 367.141 437.532 33.718 21.598 o
-3 4 2 755.013 723.340 16.514 18.666 o
-3 4 3 2515.170 2513.560 57.467 2.309 o
-3 4 4 1661.070 1544.600 33.683 5.208 o
-3 4 5 425.891 443.534 17.552 34.680 o
-3 4 6 194.473 217.266 20.294 55.575 o
-3 4 7 353.906 381.169 17.957 40.487 o
-3 4 8 8.556 11.858 11.784 271.486 o
-3 4 9 910.940 876.820 29.924 11.818 o
-3 5 1 646.516 661.843 17.904 21.622 o
-3 5 2 1507.270 1463.660 31.579 5.984 o
-3 5 3 0.320 22.743 12.833 235.067 o
-3 5 4 359.705 389.232 13.966 45.446 o
-3 5 5 621.660 604.804 16.628 23.742 o
-3 5 6 1779.970 1659.070 42.865 4.348 o
-3 5 7 660.607 596.687 22.259 20.226 o
-3 5 8 132.147 133.443 14.393 101.350 o
-3 5 9 1.923 28.723 19.046 108.967 o
-3 6 1 213.130 203.816 9.451 95.061 o
-3 6 2 588.906 574.859 15.992 25.657 o
-3 6 3 20.997 30.620 7.547 464.407 o
-3 6 4 1067.870 1027.560 24.902 10.434 o
-3 6 5 4.913 20.982 8.125 518.859 o
-3 6 6 55.897 113.251 12.436 158.556 o
-3 6 7 1.633 15.891 11.335 300.478 o
-3 6 8 1296.880 1181.190 35.073 7.272 o
-3 6 9 19.303 24.069 13.318 200.800 o
-3 7 1 189.742 194.311 14.121 81.298 o
-3 7 2 216.336 221.577 10.151 88.883 o
-3 7 3 4.507 5.121 7.122 724.097 o
-3 7 4 701.691 679.192 18.905 19.628 o
-3 7 5 66.993 58.007 8.519 256.217 o
-3 7 6 1588.770 1457.360 39.069 5.304 o
-3 7 7 4.697 35.965 17.737 122.861 o
-3 7 8 141.674 191.845 15.582 84.369 o
-3 7 9 55.246 69.968 14.492 140.565 o
-3 8 1 44.148 47.751 6.974 375.835 o
-3 8 2 1354.610 1300.000 32.851 6.894 o
-3 8 3 790.348 780.499 20.306 16.360 o
-3 8 4 180.569 191.442 11.051 99.153 o
-3 8 5 52.416 86.270 28.647 45.201 o
-3 8 6 67.878 77.769 14.720 130.267 o
-3 8 7 1027.060 1027.750 31.427 9.852 o
-3 8 8 684.340 611.240 23.985 18.801 o
-3 8 9 834.882 792.290 28.444 13.481 o
-3 9 1 650.172 661.441 15.974 22.293 o
-3 9 2 46.261 43.731 8.747 299.170 o
-3 9 3 36.970 43.750 8.297 339.691 o
-3 9 4 14.533 21.752 8.407 443.910 o
-3 9 5 2804.360 2574.250 53.754 2.091 o
-3 9 6 2.455 15.107 9.039 455.194 o
-3 9 7 1656.880 1616.080 43.442 4.673 o
-3 9 8 2.252 -7.438 12.496 259.643 o
-3 9 9 80.017 117.334 15.394 111.440 o
-3 10 1 56.988 51.237 7.733 305.559 o
-3 10 2 406.635 366.441 14.491 41.875 o
-3 10 3 921.621 925.436 23.249 12.734 o
-3 10 4 762.417 762.697 21.091 16.805 o
-3 10 5 741.851 775.877 25.188 15.816 o
-3 10 6 30.604 32.821 9.408 316.681 o
-3 10 7 420.650 417.656 19.636 33.441 o
-3 10 8 6.216 0.909 12.759 243.641 o
-3 10 9 602.274 571.649 24.432 20.863 o
-3 11 1 3429.900 3064.770 67.528 1.450 o
-3 11 2 585.764 544.114 18.324 25.046 o
-3 11 3 626.142 619.259 18.152 22.690 o
-3 11 4 510.422 547.411 22.210 25.051 o
-3 11 5 299.290 299.283 14.152 55.759 o
-3 11 6 438.946 408.386 15.090 37.493 o
-3 11 7 725.014 685.965 22.064 17.941 o
-3 11 8 105.736 115.040 14.548 111.100 o
-3 12 1 219.250 229.920 14.176 72.086 o
-3 12 2 3154.270 3153.830 57.604 1.636 o
-3 12 3 319.876 339.025 13.754 52.017 o
-3 12 4 2372.050 2293.040 48.826 2.704 o
-3 12 5 439.025 455.314 17.088 34.111 o
-3 12 6 9.324 35.765 9.712 348.740 o
-3 12 7 114.044 120.955 12.516 125.566 o
-3 12 8 641.689 610.983 32.313 16.093 o
-3 13 1 3.466 4.192 10.217 376.219 o
-3 13 2 1219.320 1202.540 28.677 8.238 o
-3 13 3 33.187 37.218 9.116 319.243 o
-3 13 4 393.162 429.825 16.230 38.496 o
-3 13 5 731.623 700.989 21.531 17.842 o
-3 13 6 824.995 798.911 21.771 15.252 o
-3 13 7 60.457 82.206 23.934 61.615 o
-3 13 8 40.828 61.890 13.824 160.781 o
-3 14 1 13.182 9.252 14.156 190.366 o
-3 14 2 1006.280 988.578 27.926 10.726 o
-3 14 3 1507.480 1457.850 30.766 6.039 o
-3 14 4 1421.670 1397.630 33.398 6.347 o
-3 14 5 464.737 475.356 17.783 31.662 o
-3 14 6 21.224 19.892 10.568 296.236 o
-3 14 7 82.501 85.953 12.000 156.956 o
-3 14 8 115.627 127.847 20.691 67.951 o
-3 15 1 3032.210 2737.330 90.139 1.508 o
-3 15 2 184.190 194.111 13.019 87.765 o
-3 15 3 175.835 217.915 12.598 88.948 o
-3 15 4 21.699 23.657 11.162 267.299 o
-3 15 5 867.568 814.561 23.840 14.018 o
-3 15 6 60.482 52.409 11.229 200.616 o
-3 15 7 382.769 376.001 16.084 41.239 o
-3 15 8 27.075 40.977 12.595 204.959 o
-3 16 1 200.766 201.281 19.794 57.306 o
-3 16 2 228.834 243.243 14.060 69.739 o
-3 16 3 2330.490 2244.700 54.017 2.684 o
-3 16 4 381.761 368.166 14.140 44.231 o
-3 16 5 513.300 471.117 18.040 29.359 o
-3 16 6 22.293 21.206 11.208 266.486 o
-3 16 7 177.650 175.353 13.054 91.545 o
-3 16 8 56.644 47.559 12.836 173.032 o
-3 17 1 1047.730 960.674 45.191 7.926 o
-3 17 2 1747.120 1674.200 49.474 4.136 o
-3 17 3 80.009 85.615 11.870 160.549 o
-3 17 4 2.983 11.493 10.105 374.798 o
-3 17 5 182.413 179.333 11.739 96.743 o
-3 17 6 472.084 462.465 18.814 30.726 o
-3 17 7 161.383 157.053 13.083 98.281 o
-3 18 1 4.721 25.511 13.328 213.176 o
-3 18 2 667.461 677.480 27.480 17.084 o
-3 18 3 20.140 9.601 10.614 306.200 o
-3 18 4 1700.820 1592.920 42.340 4.641 o
-3 18 5 17.058 14.912 10.587 308.387 o
-3 18 6 19.897 18.860 10.348 310.178 o
-3 18 7 74.530 79.773 12.152 161.719 o
-3 19 1 414.952 410.685 22.255 31.087 o
-3 19 2 557.331 559.382 25.323 21.615 o
-3 19 3 45.995 44.189 11.819 204.867 o
-3 19 4 351.258 315.772 17.758 43.319 o
-3 19 5 1.452 -9.550 10.505 367.782 o
-3 19 6 1012.450 1020.610 29.114 10.348 o
-3 19 7 8.111 0.746 12.794 240.193 o
-3 20 1 89.848 108.124 15.823 105.989 o
-3 20 2 286.343 261.984 19.340 47.630 o
-3 20 3 1231.060 1260.920 36.572 7.262 o
-3 20 4 361.593 332.668 18.053 41.490 o
-3 20 5 120.622 132.331 14.604 103.312 o
-3 20 6 58.048 58.101 12.597 172.745 o
-3 21 1 1209.190 1131.610 40.081 7.331 o
-3 21 2 25.235 21.989 14.998 160.108 o
-3 21 3 26.567 43.362 12.945 195.621 o
-3 21 4 204.266 187.709 15.884 71.707 o
-3 21 5 618.768 610.143 24.507 19.998 o
-3 21 6 101.519 114.246 19.055 79.560 o
-3 22 1 6.468 23.943 15.014 170.191 o
-3 22 2 1.155 9.484 14.639 187.135 o
-3 22 3 1263.240 1275.380 43.586 6.448 o
-3 22 4 1.987 -3.186 12.639 254.238 o
-3 22 5 105.852 115.059 15.040 106.848 o
-3 22 6 8.778 11.799 13.625 207.161 o
-3 23 1 269.979 281.758 21.680 43.292 o
-3 23 2 58.486 57.734 16.570 116.018 o
-3 23 3 12.932 24.044 15.638 154.315 o
-3 23 4 89.109 74.817 14.748 122.123 o
-3 23 5 599.211 622.786 25.405 19.858 o
-3 24 1 24.983 15.742 15.988 144.510 o
-3 24 2 66.738 62.786 17.001 108.340 o
-3 24 3 337.243 384.404 24.414 32.523 o
-3 24 4 221.636 231.005 17.817 59.492 o
-3 24 5 14.945 11.278 14.431 181.733 o
-3 25 1 27.503 14.036 18.148 114.250 o
-3 25 2 344.714 349.932 23.906 33.611 o
-3 25 3 0.514 1.046 16.109 157.589 o
-3 25 4 204.860 224.213 26.647 38.895 o
-3 26 1 22.974 41.098 18.032 113.027 o
-3 26 2 274.450 313.749 23.830 38.119 o
-3 26 3 121.271 127.101 19.477 73.138 o
-3 26 4 598.070 673.894 44.453 11.882 o
-3 27 1 356.730 412.751 51.829 12.036 o
-3 27 2 381.223 433.416 33.153 21.787 o
-3 27 3 2.156 6.244 17.302 135.073 o
-3 28 1 87.349 118.908 20.640 72.514 o
-2 0 2 10009.300 10258.700 296.184 0.145 o
-2 0 4 2138.240 2156.880 47.329 3.118 o
-2 0 6 1179.220 1267.260 46.676 6.504 o
-2 0 8 2452.880 2313.230 79.616 2.081 o
-2 0 10 50.338 87.960 18.719 94.041 o
-2 1 1 21.332 24.542 5.114 744.062 o
-2 1 2 75.268 90.243 15.218 119.367 o
-2 1 3 1501.140 1436.730 22.896 6.514 o
-2 1 4 3346.920 3378.080 50.740 1.522 o
-2 1 5 3959.140 3803.470 56.921 1.157 o
-2 1 6 1980.390 1991.850 41.958 3.633 o
-2 1 7 292.052 385.570 38.846 19.527 o
-2 1 8 57.120 151.328 31.346 37.047 o
-2 1 9 111.213 133.571 19.542 73.813 o
-2 1 10 832.843 767.080 26.586 14.145 o
-2 1 11 114.580 121.079 15.396 100.610 o
-2 2 1 2219.090 2086.350 40.352 3.200 o
-2 2 2 2599.530 2700.320 43.140 2.335 o
-2 2 3 2383.080 2415.230 38.817 2.779 o
-2 2 4 861.526 915.873 36.553 10.730 o
-2 2 5 805.520 929.497 36.640 11.126 o
-2 2 6 338.560 356.880 26.791 30.113 o
-2 2 7 4300.590 3956.600 89.163 0.921 o
-2 2 8 491.958 476.055 18.894 29.495 o
-2 2 9 718.476 691.551 24.050 17.320 o
-2 2 10 4.562 40.626 12.516 230.592 o
-2 2 11 17.224 29.383 13.326 200.077 o
-2 3 1 2964.490 2823.160 60.058 1.824 o
-2 3 2 2276.070 2261.230 36.492 3.059 o
-2 3 3 501.315 520.513 13.835 31.821 o
-2 3 4 59.228 78.523 9.593 225.356 o
-2 3 5 6009.150 5548.400 95.880 0.527 o
-2 3 6 21.634 44.596 7.320 446.791 o
-2 3 7 209.059 378.937 23.781 40.030 o
-2 3 8 21.616 53.361 10.964 252.608 o
-2 3 9 527.596 594.315 22.195 23.812 o
-2 3 10 36.364 47.275 12.536 195.238 o
-2 3 11 311.404 278.559 18.078 47.428 o
-2 4 1 3157.520 3063.260 57.017 1.664 o
-2 4 2 301.148 307.733 13.088 57.278 o
-2 4 3 2892.450 2875.490 67.269 1.779 o
-2 4 4 366.115 386.746 18.542 38.689 o
-2 4 5 130.847 178.813 16.450 83.175 o
-2 4 6 200.065 262.565 24.562 42.405 o
-2 4 7 3129.670 2940.010 60.164 1.689 o
-2 4 8 471.719 463.676 18.561 30.934 o
-2 4 9 282.251 302.462 16.436 52.470 o
-2 4 10 0.137 31.218 18.542 114.880 o
-2 5 1 1115.830 1101.190 20.645 10.185 o
-2 5 2 17.726 20.727 3.681 1089.670 o
-2 5 3 882.378 878.392 18.114 14.538 o
-2 5 4 2841.870 2698.660 53.203 2.020 o
-2 5 5 481.416 470.711 13.156 34.744 o
-2 5 6 2011.800 2023.700 43.027 3.521 o
-2 5 7 66.301 116.555 21.569 70.539 o
-2 5 8 274.941 293.833 16.694 53.087 o
-2 5 9 408.666 399.898 18.297 36.049 o
-2 5 10 904.106 864.911 28.575 12.230 o
-2 6 1 2945.260 2783.470 44.132 1.998 o
-2 6 2 2222.710 2267.300 48.263 2.911 o
-2 6 3 489.912 528.635 12.646 33.011 o
-2 6 4 1490.540 1459.960 38.023 5.680 o
-2 6 5 4.138 9.673 6.332 860.956 o
-2 6 6 1451.470 1441.780 29.717 6.358 o
-2 6 7 284.769 280.051 14.600 57.643 o
-2 6 8 1580.490 1518.790 35.583 5.415 o
-2 6 9 45.318 55.414 12.052 194.896 o
-2 6 10 0.391 41.941 12.913 221.844 o
-2 7 1 1504.430 1447.650 24.326 6.407 o
-2 7 2 4337.000 4261.130 66.361 0.952 o
-2 7 3 1395.930 1328.350 25.437 7.142 o
-2 7 4 1040.810 1047.510 24.354 10.662 o
-2 7 5 255.223 221.246 9.574 81.416 o
-2 7 6 995.918 939.548 21.595 12.066 o
-2 7 7 186.957 207.173 10.644 96.924 o
-2 7 8 232.610 281.316 17.933 55.117 o
-2 7 9 26.283 35.897 11.663 235.053 o
-2 7 10 711.228 675.806 25.012 17.253 o
-2 8 1 5838.540 5566.790 80.805 0.563 o
-2 8 2 6694.740 6707.930 104.838 0.411 o
-2 8 3 4815.710 4563.330 89.218 0.760 o
-2 8 4 911.408 860.721 21.186 13.665 o
-2 8 5 30.861 41.648 9.687 294.823 o
-2 8 6 735.703 683.025 17.623 19.226 o
-2 8 7 597.754 561.822 16.305 25.413 o
-2 8 8 653.701 638.093 20.165 20.801 o
-2 8 9 450.377 465.832 18.668 31.780 o
-2 8 10 37.928 46.219 18.742 101.248 o
-2 9 1 3700.750 3537.860 49.646 1.331 o
-2 9 2 194.550 219.377 7.792 105.565 o
-2 9 3 470.925 460.364 13.898 35.062 o
-2 9 4 148.340 158.470 9.245 129.472 o
-2 9 5 2031.000 1882.960 36.731 3.777 o
-2 9 6 161.711 167.424 9.806 117.490 o
-2 9 7 29.171 40.567 8.999 330.170 o
-2 9 8 54.406 66.102 10.429 218.306 o
-2 9 9 1791.680 1725.480 40.581 4.332 o
-2 9 10 4.750 7.976 12.201 262.624 o
-2 10 1 583.503 542.376 10.655 29.118 o
-2 10 2 395.274 398.330 11.747 44.794 o
-2 10 3 2535.240 2420.330 48.784 2.461 o
-2 10 4 102.621 111.461 8.700 179.951 o
-2 10 5 11.000 46.768 8.507 402.076 o
-2 10 6 35.121 33.020 7.859 383.342 o
-2 10 7 1214.870 1165.530 26.372 8.604 o
-2 10 8 12.574 11.726 8.824 438.671 o
-2 10 9 255.876 271.177 15.043 60.748 o
-2 10 10 105.573 91.153 14.105 119.463 o
-2 11 1 54.512 53.454 4.375 444.515 o
-2 11 2 147.935 145.033 7.286 148.650 o
-2 11 3 1041.590 955.736 22.924 11.296 o
-2 11 4 553.846 537.599 17.382 26.850 o
-2 11 5 2021.640 2025.150 43.178 3.500 o
-2 11 6 141.297 142.919 9.725 133.031 o
-2 11 7 39.194 47.574 9.051 297.936 o
-2 11 8 122.878 165.226 23.236 55.056 o
-2 11 9 403.962 383.896 21.407 33.120 o
-2 11 10 358.270 325.347 18.890 40.697 o
-2 12 1 330.273 311.798 8.781 61.099 o
-2 12 2 3567.670 3628.200 58.894 1.323 o
-2 12 3 94.280 100.555 9.353 182.406 o
-2 12 4 94.620 114.451 9.389 175.779 o
-2 12 5 118.396 123.155 12.194 126.289 o
-2 12 6 2153.130 2055.030 40.743 3.318 o
-2 12 7 49.216 47.181 9.084 277.991 o
-2 12 8 1919.060 1830.770 38.044 4.020 o
-2 12 9 4.150 8.959 10.906 325.116 o
-2 12 10 48.208 59.796 12.910 173.268 o
-2 13 1 606.474 560.217 12.646 26.882 o
-2 13 2 264.859 266.105 9.822 73.923 o
-2 13 3 97.735 109.073 8.739 184.740 o
-2 13 4 4383.670 4215.430 82.329 0.897 o
-2 13 5 467.785 476.972 16.235 32.804 o
-2 13 6 2978.190 2788.730 52.971 1.893 o
-2 13 7 134.206 126.358 13.200 110.823 o
-2 13 8 24.433 71.641 10.529 250.007 o
-2 13 9 414.111 397.861 17.599 36.598 o
-2 13 10 579.095 523.873 20.797 24.161 o
-2 14 1 2193.730 1992.560 34.185 3.439 o
-2 14 2 1119.480 1090.910 33.669 8.674 o
-2 14 3 2490.420 2278.050 43.252 2.667 o
-2 14 4 974.543 943.772 31.799 10.562 o
-2 14 5 261.772 235.668 12.152 70.789 o
-2 14 6 650.400 647.533 26.275 18.158 o
-2 14 7 369.234 373.146 14.368 44.754 o
-2 14 8 1176.190 1082.650 26.405 9.160 o
-2 14 9 339.739 336.084 16.695 45.173 o
-2 14 10 36.928 43.525 16.510 126.496 o
-2 15 1 297.354 279.353 9.821 66.856 o
-2 15 2 6.831 9.429 7.140 675.514 o
-2 15 3 3258.140 3158.000 57.926 1.577 o
-2 15 4 572.620 570.293 17.782 25.351 o
-2 15 5 2761.610 2551.340 53.350 2.138 o
-2 15 6 1258.930 1202.770 27.386 8.112 o
-2 15 7 353.149 338.773 14.148 48.035 o
-2 15 8 3.370 10.873 10.152 371.389 o
-2 15 9 574.430 622.661 19.884 23.314 o
-2 16 1 3605.290 3436.990 67.385 1.301 o
-2 16 2 812.609 819.006 21.099 15.455 o
-2 16 3 2493.900 2410.540 50.097 2.489 o
-2 16 4 77.686 84.803 8.595 220.923 o
-2 16 5 131.197 135.426 11.218 126.800 o
-2 16 6 121.089 121.473 10.067 146.728 o
-2 16 7 1018.230 945.145 24.063 11.419 o
-2 16 8 68.540 64.469 11.009 192.171 o
-2 16 9 525.111 529.218 18.888 27.119 o
-2 17 1 602.974 572.093 17.169 24.619 o
-2 17 2 435.815 407.424 14.181 38.670 o
-2 17 3 870.671 833.574 22.384 14.169 o
-2 17 4 2641.290 2494.940 47.822 2.336 o
-2 17 5 660.347 633.485 17.828 21.663 o
-2 17 6 935.694 924.854 25.477 12.165 o
-2 17 7 47.437 43.553 9.746 261.932 o
-2 17 8 0.711 10.646 10.201 375.986 o
-2 17 9 136.290 152.488 13.180 105.936 o
-2 18 1 226.375 209.502 10.990 84.633 o
-2 18 2 3621.710 3464.660 77.159 1.235 o
-2 18 3 477.795 490.995 16.479 31.749 o
-2 18 4 506.046 489.370 17.002 30.060 o
-2 18 5 20.760 18.966 8.293 432.940 o
-2 18 6 209.006 196.860 15.610 71.252 o
-2 18 7 22.913 16.483 9.638 342.796 o
-2 18 8 823.480 752.443 21.984 15.595 o
-2 18 9 24.641 26.302 18.093 113.952 o
-2 19 1 283.450 256.151 12.273 65.195 o
-2 19 2 86.561 91.104 9.856 185.270 o
-2 19 3 429.937 414.508 15.329 37.622 o
-2 19 4 2017.780 1940.530 42.910 3.586 o
-2 19 5 485.255 471.111 20.768 28.352 o
-2 19 6 837.791 782.236 21.291 15.299 o
-2 19 7 134.428 141.261 11.695 120.103 o
-2 19 8 67.591 80.641 11.403 178.786 o
-2 19 9 4.314 24.300 12.709 233.807 o
-2 20 1 756.862 718.949 20.742 17.424 o
-2 20 2 1808.020 1816.900 40.621 4.191 o
-2 20 3 827.605 766.052 24.750 14.704 o
-2 20 4 322.455 292.927 16.471 48.951 o
-2 20 5 20.445 29.982 10.116 308.603 o
-2 20 6 54.168 53.004 10.867 215.148 o
-2 20 7 744.736 722.099 19.464 18.028 o
-2 20 8 322.866 293.049 13.497 54.722 o
-2 21 1 2489.010 2264.070 48.498 2.595 o
-2 21 2 26.150 31.463 11.802 233.548 o
-2 21 3 55.313 42.850 10.946 217.508 o
-2 21 4 13.986 12.501 9.585 376.076 o
-2 21 5 1149.260 1089.250 28.806 9.061 o
-2 21 6 4.645 -4.582 10.028 392.810 o
-2 21 7 122.197 124.689 11.245 133.306 o
-2 21 8 39.683 62.263 11.181 218.025 o
-2 22 1 704.470 708.104 21.122 18.463 o
-2 22 2 273.811 286.158 13.927 60.277 o
-2 22 3 1224.400 1171.190 34.032 7.775 o
-2 22 4 47.150 55.820 11.552 204.459 o
-2 22 5 4.798 14.598 10.223 357.612 o
-2 22 6 2.019 -6.239 10.202 387.961 o
-2 22 7 607.666 585.353 22.975 21.311 o
-2 22 8 42.944 47.731 11.472 214.824 o
-2 23 1 1131.680 1108.030 28.622 9.141 o
-2 23 2 13.807 13.646 9.957 351.506 o
-2 23 3 47.707 46.081 11.599 207.593 o
-2 23 4 207.906 201.465 16.981 65.953 o
-2 23 5 430.771 444.164 17.970 33.974 o
-2 23 6 103.689 110.200 14.187 115.883 o
-2 23 7 33.416 34.193 12.037 216.927 o
-2 24 1 280.451 295.995 14.607 57.182 o
-2 24 2 1883.870 1892.930 43.155 3.871 o
-2 24 3 70.104 83.148 12.880 152.436 o
-2 24 4 269.524 241.967 16.002 58.298 o
-2 24 5 0.327 18.645 15.378 167.743 o
-2 24 6 163.671 166.596 14.209 89.812 o
-2 24 7 178.622 179.199 15.002 81.011 o
-2 25 1 672.429 668.662 24.584 18.218 o
-2 25 2 91.453 124.450 12.258 137.921 o
-2 25 3 181.602 203.157 15.257 76.939 o
-2 25 4 610.290 625.595 24.076 20.221 o
-2 25 5 8.460 -3.050 11.987 272.058 o
-2 25 6 168.459 161.531 15.916 80.287 o
-2 25 7 29.720 65.531 13.513 172.451 o
-2 26 1 144.573 175.642 15.415 86.407 o
-2 26 2 1347.240 1425.730 35.497 6.453 o
-2 26 3 236.923 254.861 16.998 58.690 o
-2 26 4 58.222 64.240 13.304 158.412 o
-2 26 5 42.919 62.976 14.064 155.192 o
-2 26 6 87.886 69.302 17.482 97.700 o
-2 27 1 871.998 893.650 32.475 11.588 o
-2 27 2 238.684 288.738 15.832 59.675 o
-2 27 3 16.801 18.260 12.389 233.522 o
-2 27 4 474.411 484.851 21.839 27.631 o
-2 27 5 295.102 267.875 18.264 48.925 o
-2 27 6 21.673 32.275 14.508 168.692 o
-2 28 1 594.129 593.015 24.277 20.882 o
-2 28 2 6.665 16.327 12.637 238.198 o
-2 28 3 553.439 528.654 22.891 23.587 o
-2 28 4 162.889 181.852 16.299 77.552 o
-2 28 5 60.732 53.033 15.620 127.048 o
-2 29 1 71.032 94.179 14.822 124.517 o
-2 29 2 60.654 70.563 17.202 107.012 o
-2 29 3 358.363 373.986 21.997 34.880 o
-2 29 4 275.858 286.636 19.053 48.091 o
-2 29 5 1099.390 1184.460 37.079 8.100 o
-2 30 1 182.195 194.198 19.998 59.001 o
-2 30 2 370.298 377.224 24.106 31.640 o
-2 30 3 301.727 348.184 20.175 41.661 o
-2 30 4 21.757 17.002 14.198 180.284 o
-2 31 1 15.712 11.963 13.883 194.230 o
-2 31 2 17.767 24.178 19.808 98.158 o
-2 31 3 7.759 22.749 14.694 176.706 o
-2 32 1 149.702 136.425 19.286 69.326 o
-2 32 2 570.697 657.686 31.179 17.329 o
-1 0 2 6210.500 6594.580 149.485 0.401 o
-1 0 4 2589.740 2745.730 57.861 2.142 o
-1 0 6 7241.040 7785.770 159.354 0.308 o
-1 0 8 1312.980 1422.570 41.091 6.179 o
-1 0 10 163.856 177.375 19.522 63.818 o
-1 1 1 4151.470 4278.570 77.400 0.960 o
-1 1 2 40.255 42.834 2.901 651.316 o
-1 1 3 1614.950 1689.160 25.751 5.448 o
-1 1 4 2034.680 2129.030 32.181 3.642 o
-1 1 5 771.897 790.180 22.300 16.052 o
-1 1 6 754.326 854.421 16.112 17.402 o
-1 1 7 381.635 465.117 22.075 31.543 o
-1 1 8 1792.400 1890.140 36.608 4.279 o
-1 1 9 933.552 962.449 25.023 12.064 o
-1 1 10 773.155 813.297 40.132 11.077 o
-1 1 11 179.329 203.213 15.632 75.708 o
-1 2 1 3327.730 3523.120 58.681 1.450 o
-1 2 2 550.923 578.265 10.572 29.832 o
-1 2 3 1045.590 1119.110 19.617 10.866 o
-1 2 4 1028.820 1038.100 22.733 11.040 o
-1 2 5 3640.580 3862.480 84.467 1.124 o
-1 2 6 3700.840 3828.060 56.936 1.243 o
-1 2 7 2356.390 2441.370 41.162 2.761 o
-1 2 8 354.408 389.601 25.965 29.879 o
-1 2 9 6.515 83.409 12.726 201.028 o
-1 2 10 2.367 25.300 11.499 283.067 o
-1 2 11 721.667 770.616 26.915 15.633 o
-1 3 1 14211.900 15308.000 303.791 0.084 o
-1 3 2 135.768 148.312 6.890 159.023 o
-1 3 3 5353.390 5632.850 88.643 0.605 o
-1 3 4 3286.450 3431.210 50.561 1.540 o
-1 3 5 1315.320 1370.460 22.110 7.677 o
-1 3 6 222.631 264.663 7.726 89.851 o
-1 3 7 552.276 628.635 17.782 25.049 o
-1 3 8 83.748 111.924 9.581 183.079 o
-1 3 9 2250.580 2256.600 48.232 2.883 o
-1 3 10 109.096 117.772 12.919 124.420 o
-1 3 11 470.959 491.332 21.369 28.023 o
-1 4 1 58828.300 62833.100 1142.800 0.005 o
-1 4 2 214.013 222.172 7.316 100.230 o
-1 4 3 5150.440 5418.890 96.225 0.632 o
-1 4 4 404.095 414.168 8.865 46.277 o
-1 4 5 1737.680 1813.660 28.359 4.783 o
-1 4 6 742.335 730.093 15.036 19.288 o
-1 4 7 2381.090 2448.370 41.424 2.723 o
-1 4 8 585.312 674.320 30.417 17.289 o
-1 4 9 322.663 363.890 14.736 48.758 o
-1 4 10 230.248 250.112 13.992 69.167 o
-1 4 11 901.513 949.937 36.071 10.364 o
-1 5 1 1205.120 1202.160 18.392 9.234 o
-1 5 2 4620.090 4680.260 74.819 0.821 o
-1 5 3 8292.110 8380.640 150.833 0.261 o
-1 5 4 4100.100 4315.160 73.076 0.983 o
-1 5 5 509.224 521.391 10.355 33.566 o
-1 5 6 17.024 21.912 8.599 418.869 o
-1 5 7 58.525 93.326 20.554 79.032 o
-1 5 8 2473.780 2492.770 46.830 2.515 o
-1 5 9 472.068 530.170 17.541 30.255 o
-1 5 10 1676.930 1653.710 61.327 3.785 o
-1 5 11 98.009 136.975 17.589 87.192 o
-1 6 1 9549.120 9859.580 171.353 0.197 o
-1 6 2 9011.900 8996.100 155.147 0.227 o
-1 6 3 674.926 653.574 15.658 21.816 o
-1 6 4 172.023 199.207 15.678 77.192 o
-1 6 5 1.254 7.961 4.752 1520.870 o
-1 6 6 4175.310 4215.260 67.619 0.995 o
-1 6 7 109.555 97.392 7.721 193.709 o
-1 6 8 823.361 869.305 20.503 15.024 o
-1 6 9 350.425 311.976 13.807 50.163 o
-1 6 10 434.651 477.297 17.851 33.033 o
-1 6 11 46.685 45.959 15.884 130.504 o
-1 7 1 310.258 278.609 6.184 71.380 o
-1 7 2 3155.980 3077.660 52.803 1.692 o
-1 7 3 1477.580 1438.650 29.735 6.255 o
-1 7 4 11533.200 11615.800 178.189 0.144 o
-1 7 5 2543.520 2468.620 43.553 2.501 o
-1 7 6 445.397 489.225 13.338 36.200 o
-1 7 7 31.005 60.375 21.465 79.694 o
-1 7 8 506.176 656.712 17.381 26.408 o
-1 7 9 21.477 20.623 9.277 361.687 o
-1 7 10 365.574 367.439 15.699 43.389 o
-1 7 11 6.727 12.400 13.362 216.560 o
-1 8 1 5150.040 5090.760 69.561 0.703 o
-1 8 2 7420.820 7207.680 120.175 0.341 o
-1 8 3 1564.790 1498.440 30.991 5.735 o
-1 8 4 580.740 592.310 18.678 24.227 o
-1 8 5 1490.320 1547.980 28.801 6.033 o
-1 8 6 1351.660 1399.360 28.058 7.014 o
-1 8 7 2482.160 2486.450 52.583 2.425 o
-1 8 8 64.274 67.736 8.908 242.701 o
-1 8 9 11.306 34.257 9.523 356.517 o
-1 8 10 40.650 48.403 10.422 246.922 o
-1 8 11 293.169 343.367 19.715 43.230 o
-1 9 1 667.706 616.402 10.921 24.240 o
-1 9 2 1360.900 1308.890 24.333 7.450 o
-1 9 3 7880.140 7686.540 142.095 0.295 o
-1 9 4 103.137 106.861 7.457 199.199 o
-1 9 5 6316.000 6153.190 105.822 0.460 o
-1 9 6 496.848 520.890 14.083 31.867 o
-1 9 7 111.528 153.870 10.897 134.731 o
-1 9 8 87.505 96.381 8.864 198.549 o
-1 9 9 1601.440 1569.120 33.049 5.388 o
-1 9 10 62.915 33.391 12.673 176.708 o
-1 9 11 115.451 134.736 22.655 59.239 o
-1 10 1 3712.930 3523.420 51.732 1.320 o
-1 10 2 2929.120 2764.910 48.243 1.980 o
-1 10 3 2315.220 2202.600 43.900 2.916 o
-1 10 4 396.675 382.099 12.436 44.563 o
-1 10 5 1810.910 1733.620 33.426 4.529 o
-1 10 6 206.431 211.227 9.422 96.072 o
-1 10 7 3106.710 3063.740 56.364 1.698 o
-1 10 8 89.423 97.059 9.031 193.529 o
-1 10 9 46.152 61.283 9.137 269.294 o
-1 10 10 263.862 269.559 17.218 54.265 o
-1 10 11 607.838 630.013 29.348 17.761 o
-1 11 1 64.936 61.078 5.245 358.115 o
-1 11 2 6576.020 6203.900 97.070 0.446 o
-1 11 3 2458.520 2343.730 51.340 2.540 o
-1 11 4 6914.060 6517.640 122.110 0.388 o
-1 11 5 1092.710 1076.230 22.856 10.254 o
-1 11 6 1291.140 1256.910 26.369 7.843 o
-1 11 7 554.386 561.015 15.808 27.312 o
-1 11 8 471.124 593.916 16.841 29.413 o
-1 11 9 1126.340 1116.120 26.019 9.450 o
-1 11 10 497.707 490.274 22.907 25.893 o
-1 11 11 160.570 170.468 18.963 66.923 o
-1 12 1 434.879 431.909 8.971 42.674 o
-1 12 2 6393.050 5947.250 91.634 0.477 o
-1 12 3 0.710 9.039 6.078 992.714 o
-1 12 4 214.161 229.972 10.177 88.259 o
-1 12 5 1328.060 1284.190 26.402 7.554 o
-1 12 6 2420.160 2329.320 44.749 2.695 o
-1 12 7 186.570 188.698 9.895 103.742 o
-1 12 8 404.562 443.277 19.617 33.626 o
-1 12 9 19.033 39.235 9.294 342.281 o
-1 12 10 871.802 893.032 34.235 11.221 o
-1 12 11 58.782 51.973 17.129 110.906 o
-1 13 1 2772.430 2731.540 47.527 2.121 o
-1 13 2 488.739 454.180 9.639 37.337 o
-1 13 3 1006.330 900.209 19.455 12.496 o
-1 13 4 1798.850 1675.810 35.782 4.551 o
-1 13 5 1434.880 1365.910 27.911 6.707 o
-1 13 6 19.116 23.329 7.390 505.981 o
-1 13 7 77.766 70.330 8.787 225.739 o
-1 13 8 1798.150 1703.820 52.008 3.905 o
-1 13 9 195.183 208.126 13.659 80.775 o
-1 13 10 1389.700 1301.410 37.626 6.378 o
-1 14 1 1435.360 1372.140 22.424 7.006 o
-1 14 2 818.821 794.661 14.338 17.105 o
-1 14 3 465.597 471.100 12.821 35.942 o
-1 14 4 23.366 25.259 7.306 485.636 o
-1 14 5 19.543 20.222 7.866 469.676 o
-1 14 6 365.502 351.223 12.264 49.100 o
-1 14 7 767.033 733.117 22.405 16.599 o
-1 14 8 250.447 274.131 18.233 52.888 o
-1 14 9 56.243 71.162 16.558 114.728 o
-1 14 10 312.581 301.757 18.291 45.956 o
-1 15 1 26.591 29.628 6.172 553.962 o
-1 15 2 166.663 161.816 5.803 141.783 o
-1 15 3 1393.320 1324.590 29.543 6.893 o
-1 15 4 4.430 6.216 6.134 933.155 o
-1 15 5 752.774 702.402 21.701 17.362 o
-1 15 6 3.313 -4.927 7.246 742.175 o
-1 15 7 958.858 946.887 24.252 12.006 o
-1 15 8 85.063 99.768 9.951 181.304 o
-1 15 9 1994.480 1827.370 47.756 3.587 o
-1 15 10 148.345 138.110 15.431 89.699 o
-1 16 1 985.438 947.691 16.882 12.827 o
-1 16 2 74.311 81.315 5.040 310.776 o
-1 16 3 9.080 5.490 6.663 754.300 o
-1 16 4 48.268 66.120 7.319 323.555 o
-1 16 5 3543.130 3502.850 63.675 1.333 o
-1 16 6 1209.570 1135.200 30.456 8.330 o
-1 16 7 2505.260 2336.550 45.610 2.583 o
-1 16 8 30.177 40.713 10.181 277.384 o
-1 16 9 22.206 38.577 16.994 126.312 o
-1 16 10 69.998 80.785 20.072 81.278 o
-1 17 1 120.101 118.179 7.074 182.051 o
-1 17 2 11.160 13.911 5.291 945.533 o
-1 17 3 2787.300 2636.530 53.528 2.082 o
-1 17 4 1875.400 1774.430 42.282 4.035 o
-1 17 5 2009.810 1847.210 36.689 3.855 o
-1 17 6 331.321 335.667 12.798 52.654 o
-1 17 7 153.292 157.656 10.727 116.575 o
-1 17 8 1294.380 1208.630 30.712 7.601 o
-1 17 9 507.569 454.200 21.332 27.380 o
-1 17 10 483.833 467.450 22.522 27.053 o
-1 18 1 7.688 14.541 4.821 1142.330 o
-1 18 2 1212.480 1153.340 22.177 9.050 o
-1 18 3 150.249 165.366 10.347 118.952 o
-1 18 4 98.368 110.573 9.520 172.507 o
-1 18 5 395.791 453.915 16.072 37.733 o
-1 18 6 1896.430 1789.180 33.662 4.246 o
-1 18 7 283.078 275.249 13.929 59.770 o
-1 18 8 544.470 562.905 22.804 23.405 o
-1 18 9 14.399 15.572 12.977 219.020 o
-1 18 10 287.681 265.967 18.836 48.431 o
-1 19 1 3.488 9.129 5.054 1269.520 o
-1 19 2 1615.830 1644.100 55.946 4.146 o
-1 19 3 94.022 94.981 8.967 191.177 o
-1 19 4 2924.200 2818.310 61.554 1.836 o
-1 19 5 626.426 620.862 20.188 21.722 o
-1 19 6 566.894 561.859 16.937 26.178 o
-1 19 7 273.186 238.873 12.065 68.798 o
-1 19 8 1009.740 1001.150 27.727 10.669 o
-1 19 9 254.206 254.937 18.151 53.679 o
-1 20 1 1324.810 1335.710 25.415 7.501 o
-1 20 2 2088.170 1944.210 37.933 3.584 o
-1 20 3 12.133 12.736 8.081 506.292 o
-1 20 4 49.256 35.414 9.440 276.016 o
-1 20 5 823.762 785.055 35.256 11.940 o
-1 20 6 909.731 875.320 26.710 12.494 o
-1 20 7 817.938 816.752 24.233 14.609 o
-1 20 8 504.862 486.107 22.195 26.255 o
-1 20 9 9.097 10.116 13.706 205.324 o
-1 21 1 16.331 36.561 8.259 418.275 o
-1 21 2 1167.320 1144.820 25.090 9.135 o
-1 21 3 2686.620 2579.340 53.661 2.185 o
-1 21 4 850.515 830.124 23.125 14.312 o
-1 21 5 1563.330 1550.050 36.436 5.376 o
-1 21 6 311.776 306.825 14.970 52.262 o
-1 21 7 144.172 134.884 12.680 109.919 o
-1 21 8 5.504 24.415 13.464 209.001 o
-1 21 9 1181.850 1104.330 36.005 7.986 o
-1 22 1 4033.360 4007.220 71.266 1.049 o
-1 22 2 8.851 11.354 8.710 465.353 o
-1 22 3 634.330 612.814 19.226 22.059 o
-1 22 4 110.631 99.902 11.362 144.561 o
-1 22 5 285.674 303.963 14.860 55.520 o
-1 22 6 208.105 212.450 14.304 75.156 o
-1 22 7 773.555 789.618 32.527 13.149 o
-1 22 8 186.490 187.759 16.980 70.111 o
-1 22 9 84.239 123.419 16.826 97.217 o
-1 23 1 529.788 570.046 15.950 28.033 o
-1 23 2 626.449 610.718 16.975 23.343 o
-1 23 3 2337.270 2317.190 49.679 2.715 o
-1 23 4 1040.460 1033.460 27.107 10.347 o
-1 23 5 1194.490 1205.710 30.895 8.162 o
-1 23 6 161.601 155.606 18.852 68.259 o
-1 23 7 1.644 -3.474 11.251 320.664 o
-1 23 8 57.108 93.918 15.133 126.398 o
-1 24 1 341.428 351.195 14.317 48.282 o
-1 24 2 2810.120 2691.440 56.057 2.016 o
-1 24 3 2.139 -4.206 9.357 459.232 o
-1 24 4 59.132 66.168 12.281 174.848 o
-1 24 5 3.174 5.402 13.531 218.237 o
-1 24 6 1476.870 1479.260 38.449 5.668 o
-1 24 7 47.346 33.483 14.040 161.561 o
-1 24 8 648.399 588.222 29.744 17.245 o
-1 25 1 0.467 11.364 12.387 258.689 o
-1 25 2 344.316 372.866 15.220 45.620 o
-1 25 3 551.329 607.810 19.886 24.247 o
-1 25 4 2639.820 2509.550 54.203 2.247 o
-1 25 5 426.631 432.271 17.653 34.843 o
-1 25 6 437.287 420.167 18.214 34.014 o
-1 25 7 0.549 5.300 13.720 214.927 o
-1 25 8 425.989 469.873 23.608 28.155 o
-1 26 1 1448.780 1520.920 44.183 5.342 o
-1 26 2 585.580 570.647 18.866 24.317 o
-1 26 3 145.443 142.059 13.374 103.325 o
-1 26 4 22.198 35.882 12.116 225.896 o
-1 26 5 491.986 479.195 18.785 29.514 o
-1 26 6 1020.410 1060.080 29.841 10.010 o
-1 26 7 325.990 328.263 20.303 40.504 o
-1 27 1 1.821 36.653 10.008 349.712 o
-1 27 2 0.752 4.276 10.885 339.397 o
-1 27 3 868.862 881.559 28.246 12.598 o
-1 27 4 355.435 308.072 17.713 43.368 o
-1 27 5 246.332 242.238 15.202 63.548 o
-1 27 6 6.864 -8.579 11.526 295.998 o
-1 27 7 119.756 127.860 19.767 71.844 o
-1 28 1 1785.500 1948.150 52.298 3.697 o
-1 28 2 637.325 649.261 23.624 19.554 o
-1 28 3 143.211 140.198 14.123 99.118 o
-1 28 4 160.463 142.288 14.546 91.614 o
-1 28 5 299.618 301.426 16.536 50.581 o
-1 28 6 130.353 108.197 15.715 95.823 o
-1 28 7 574.761 593.658 26.367 20.231 o
-1 29 1 27.937 94.540 13.177 170.265 o
-1 29 2 82.958 100.098 13.316 135.609 o
-1 29 3 49.038 53.910 13.019 172.684 o
-1 29 4 380.351 382.217 22.336 33.187 o
-1 29 5 24.233 32.434 17.328 122.346 o
-1 29 6 6.150 14.212 14.342 189.160 o
-1 30 1 76.380 99.716 13.428 137.455 o
-1 30 2 745.114 787.224 27.054 15.111 o
-1 30 3 29.909 39.779 12.811 197.535 o
-1 30 4 80.293 101.146 20.749 74.128 o
-1 30 5 5.382 9.090 13.677 209.957 o
-1 30 6 421.484 385.122 30.879 23.224 o
-1 31 1 12.530 8.722 13.220 216.982 o
-1 31 2 27.225 31.404 12.881 201.861 o
-1 31 3 9.661 -4.478 12.593 246.103 o
-1 31 4 305.660 298.868 18.479 46.277 o
-1 31 5 2.086 -19.979 13.329 228.705 o
-1 32 1 74.522 99.624 14.144 129.736 o
-1 32 2 416.233 465.879 21.232 30.881 o
-1 32 3 23.456 28.675 13.523 190.323 o
-1 32 4 209.483 251.659 18.215 58.489 o
-1 33 1 130.635 153.174 15.346 92.649 o
-1 33 2 180.223 216.658 22.817 49.552 o
-1 33 3 181.000 203.757 17.205 68.830 o
-1 34 1 346.903 397.237 20.560 36.784 o
-1 34 2 18.076 17.220 13.564 198.367 o
0 0 2 27890.400 34984.200 699.693 0.019 o
0 0 4 86.634 97.588 5.522 259.211 o
0 0 6 2363.800 2659.980 57.139 2.385 o
0 0 8 490.687 567.067 18.573 27.932 o
0 0 10 2582.270 2694.460 88.779 1.750 o
0 1 1 265.925 329.572 5.169 76.787 o
0 1 2 19396.400 24328.400 343.287 0.044 o
0 1 3 4778.580 5981.710 85.674 0.663 o
0 1 4 102.004 127.586 4.277 229.538 o
0 1 5 563.148 678.628 12.272 26.422 o
0 1 6 107.522 126.814 5.697 206.623 o
0 1 7 910.668 1075.830 18.956 12.666 o
0 1 8 3806.090 4143.370 62.483 1.130 o
0 1 9 422.127 493.933 22.191 29.144 o
0 1 10 415.100 527.244 35.604 18.638 o
0 1 11 120.887 130.711 14.787 102.088 o
0 2 1 2880.920 3364.710 95.644 1.390 o
0 2 2 161.718 182.688 3.896 147.769 o
0 2 3 902.042 1084.030 16.791 13.034 o
0 2 4 830.574 909.368 14.843 15.728 o
0 2 5 1537.550 1811.070 27.978 5.418 o
0 2 6 2128.880 2365.660 36.306 3.203 o
0 2 7 259.355 303.947 12.697 64.146 o
0 2 8 334.987 412.387 10.849 51.093 o
0 2 9 1314.810 1446.250 27.459 7.122 o
0 2 10 809.107 877.832 27.315 13.549 o
0 2 11 584.074 635.755 28.728 18.429 o
0 3 1 3306.050 3648.180 108.777 1.107 o
0 3 2 34.333 34.238 3.129 747.289 o
0 3 3 8080.120 9721.850 146.655 0.248 o
0 3 4 725.161 795.775 13.270 19.371 o
0 3 5 55.982 68.646 6.152 342.445 o
0 3 6 322.047 355.276 9.053 58.759 o
0 3 7 2587.620 3052.930 46.610 2.151 o
0 3 8 1988.180 2030.360 35.407 3.751 o
0 3 9 1070.980 1178.900 25.655 9.678 o
0 3 10 220.374 239.671 13.229 74.404 o
0 3 11 358.516 391.668 33.116 22.739 o
0 4 0 11042.500 11333.300 366.757 0.111 o
0 4 1 9311.710 9666.540 186.318 0.199 o
0 4 2 1996.130 2249.580 87.060 2.288 o
0 4 3 3343.480 3717.710 61.373 1.384 o
0 4 4 2048.270 2209.050 33.064 3.526 o
0 4 5 5342.340 6047.140 87.564 0.583 o
0 4 6 1260.330 1358.110 22.226 8.034 o
0 4 7 1445.580 1597.010 26.274 6.243 o
0 4 8 48.547 115.880 14.591 131.959 o
0 4 9 247.232 279.253 11.512 71.362 o
0 4 10 129.668 161.409 12.132 114.531 o
0 4 11 844.372 827.427 40.485 10.388 o
0 5 1 1105.200 1118.470 17.115 10.553 o
0 5 2 8738.750 9645.990 188.337 0.212 o
0 5 3 34.764 44.151 2.764 710.807 o
0 5 4 5119.840 5621.460 154.370 0.510 o
0 5 5 2033.970 2220.710 33.844 3.525 o
0 5 6 561.653 642.536 29.633 18.348 o
0 5 7 1115.060 1192.340 20.619 9.804 o
0 5 8 2656.490 2847.130 47.881 2.166 o
0 5 9 590.337 635.006 17.055 24.059 o
0 5 10 357.686 392.612 18.494 39.104 o
0 5 11 27.369 42.184 31.412 39.872 o
0 6 0 7651.160 7843.060 158.256 0.290 o
0 6 1 823.184 812.341 12.764 17.148 o
0 6 2 1010.790 1002.710 33.552 9.749 o
0 6 3 2644.980 2850.320 45.466 2.200 o
0 6 4 5252.510 5872.250 84.507 0.609 o
0 6 5 1146.460 1244.290 26.836 8.754 o
0 6 6 7460.800 8141.510 117.640 0.317 o
0 6 7 849.369 871.005 16.126 15.498 o
0 6 8 69.045 122.681 24.138 58.191 o
0 6 9 511.804 527.271 15.570 29.972 o
0 6 10 1635.230 1637.200 44.353 4.658 o
0 6 11 5.452 10.220 18.247 120.024 o
0 7 1 1301.530 1277.770 19.522 8.209 o
0 7 2 9245.460 9259.360 310.264 0.157 o
0 7 3 1339.270 1352.990 21.176 7.647 o
0 7 4 2905.890 3040.670 44.963 1.926 o
0 7 5 17.475 19.549 4.947 857.718 o
0 7 6 1292.550 1431.360 23.433 7.548 o
0 7 7 529.178 572.861 13.361 29.529 o
0 7 8 5983.140 6051.600 103.590 0.495 o
0 7 9 233.273 264.720 11.822 74.363 o
0 7 10 602.755 635.532 22.386 21.099 o
0 7 11 0.406 10.523 19.136 110.611 o
0 8 0 8333.090 8976.400 181.414 0.235 o
0 8 1 1274.490 1278.860 19.790 8.364 o
0 8 2 30.631 25.470 2.993 878.524 o
0 8 3 4729.710 4826.660 69.768 0.798 o
0 8 4 2629.190 2748.980 40.949 2.308 o
0 8 5 5251.290 5413.610 78.861 0.649 o
0 8 6 2442.950 2590.380 39.797 2.593 o
0 8 7 964.694 1161.540 22.194 11.136 o
0 8 8 68.449 71.510 8.661 240.288 o
0 8 9 837.499 909.614 49.211 8.494 o
0 8 10 768.561 782.226 25.606 15.225 o
0 8 11 1231.100 1143.190 49.820 6.241 o
0 9 1 4792.190 4638.180 67.287 0.809 o
0 9 2 641.457 633.661 13.012 24.123 o
0 9 3 2520.150 2448.410 39.520 2.590 o
0 9 4 814.930 842.454 14.383 16.708 o
0 9 5 193.348 200.965 6.170 116.442 o
0 9 6 3.649 6.271 8.720 501.996 o
0 9 7 3796.040 4103.170 66.275 1.125 o
0 9 8 181.357 183.817 9.612 107.913 o
0 9 9 3055.250 3023.240 69.037 1.630 o
0 9 10 10.320 18.636 11.596 271.381 o
0 9 11 28.972 39.909 15.132 150.985 o
0 10 0 8111.390 8347.650 478.896 0.114 o
0 10 1 6722.670 6498.570 94.024 0.426 o
0 10 2 1024.400 975.431 18.838 11.935 o
0 10 3 609.585 588.836 11.703 26.596 o
0 10 4 3574.340 3616.830 53.468 1.349 o
0 10 5 2529.480 2485.960 37.895 2.579 o
0 10 6 1884.300 1889.580 37.247 4.055 o
0 10 7 1715.500 1730.010 31.129 4.871 o
0 10 8 30.669 31.759 8.743 350.470 o
0 10 9 467.978 487.427 19.186 30.039 o
0 10 10 9.055 37.564 12.120 240.259 o
0 10 11 981.947 988.284 36.973 9.467 o
0 11 1 3921.110 3707.430 54.656 1.195 o
0 11 2 3508.020 3305.870 67.095 1.367 o
0 11 3 2486.520 2496.810 43.892 2.541 o
0 11 4 6404.370 6454.840 93.513 0.453 o
0 11 5 471.609 475.754 9.930 37.570 o
0 11 6 678.273 702.685 27.785 16.572 o
0 11 7 334.558 382.186 16.014 44.810 o
0 11 8 888.738 822.588 27.833 12.799 o
0 11 9 621.990 591.215 21.410 21.650 o
0 11 10 80.424 85.667 12.895 145.809 o
0 11 11 180.971 160.149 15.668 79.227 o
0 12 0 1108.770 1092.040 40.397 7.900 o
0 12 1 7948.330 7665.680 110.455 0.310 o
0 12 2 940.211 838.915 20.478 13.557 o
0 12 3 576.929 572.497 13.058 27.634 o
0 12 4 6333.560 6559.960 116.664 0.431 o
0 12 5 682.315 652.740 15.765 21.583 o
0 12 6 4458.790 4340.520 69.638 0.905 o
0 12 7 14.112 29.847 7.492 506.135 o
0 12 8 212.605 220.361 13.610 76.276 o
0 12 9 17.707 48.024 11.339 248.932 o
0 12 10 1016.980 974.335 30.473 10.294 o
0 12 11 1.967 32.468 13.599 204.751 o
0 13 1 52.244 72.769 8.581 266.502 o
0 13 2 6125.730 5932.990 86.279 0.508 o
0 13 3 1621.180 1489.410 28.108 5.683 o
0 13 4 6853.400 6862.130 99.671 0.400 o
0 13 5 44.043 44.783 9.523 274.039 o
0 13 6 194.911 199.311 8.084 107.803 o
0 13 7 679.221 621.841 20.915 20.064 o
0 13 8 997.468 1002.490 29.220 10.539 o
0 13 9 205.343 221.916 14.870 72.606 o
0 13 10 27.637 48.562 13.019 190.803 o
0 13 11 3.527 1.849 13.751 212.799 o
0 14 0 972.118 952.098 23.582 11.945 o
0 14 1 4553.810 4327.130 63.980 0.900 o
0 14 2 917.664 865.871 15.406 14.563 o
0 14 3 5.018 13.374 9.987 374.246 o
0 14 4 722.680 698.546 15.949 19.874 o
0 14 5 3278.390 3226.500 50.837 1.596 o
0 14 6 1014.210 997.217 28.201 10.574 o
0 14 7 329.458 356.711 16.133 46.106 o
0 14 8 58.739 67.152 11.155 196.910 o
0 14 9 266.464 255.685 15.781 58.420 o
0 14 10 600.156 593.017 23.335 21.219 o
0 14 11 682.326 651.458 39.111 12.900 o
0 15 1 2829.600 2808.400 44.866 2.071 o
0 15 2 679.327 654.869 12.670 22.689 o
0 15 3 9834.340 9287.110 155.586 0.202 o
0 15 4 327.376 319.864 9.173 60.303 o
0 15 5 1162.000 1152.140 21.749 9.478 o
0 15 6 2.464 2.231 6.442 922.104 o
0 15 7 919.333 952.276 34.032 10.592 o
0 15 8 22.270 38.882 10.890 264.993 o
0 15 9 407.032 430.082 19.541 33.919 o
0 15 10 4.365 4.315 12.290 262.159 o
0 16 0 10.880 14.632 5.926 811.094 o
0 16 1 10327.600 9953.550 169.030 0.180 o
0 16 2 218.240 192.491 6.684 106.230 o
0 16 3 70.716 75.542 16.278 112.411 o
0 16 4 1.767 4.671 6.087 1013.190 o
0 16 5 3187.340 3013.090 77.002 1.499 o
0 16 6 67.597 64.136 8.618 247.947 o
0 16 7 270.249 269.955 15.198 58.588 o
0 16 8 84.091 93.261 12.155 151.623 o
0 16 9 920.383 899.285 31.201 11.360 o
0 16 10 72.607 75.119 13.789 140.580 o
0 17 1 794.829 876.320 16.829 16.261 o
0 17 2 2660.150 2447.750 38.192 2.456 o
0 17 3 3203.840 2988.540 66.650 1.583 o
0 17 4 3111.320 3033.510 54.667 1.717 o
0 17 5 412.927 378.282 11.813 44.063 o
0 17 6 2.794 -1.065 9.317 460.267 o
0 17 7 978.889 978.909 29.187 10.813 o
0 17 8 570.768 550.869 21.764 23.437 o
0 17 9 695.539 614.030 23.882 18.583 o
0 17 10 1.815 7.422 13.804 210.216 o
0 18 0 5233.200 5238.600 109.612 0.607 o
0 18 1 340.520 337.451 16.742 44.976 o
0 18 2 2225.290 2067.810 33.115 3.344 o
0 18 3 172.183 161.187 8.698 121.471 o
0 18 4 232.397 223.555 14.869 68.042 o
0 18 5 218.952 206.308 11.044 86.607 o
0 18 6 425.180 380.957 17.077 37.038 o
0 18 7 63.441 83.000 11.913 172.107 o
0 18 8 338.592 313.024 17.237 45.290 o
0 18 9 229.709 231.051 16.770 61.735 o
0 18 10 1066.160 1011.980 33.074 9.380 o
0 19 1 10.291 18.501 5.164 947.529 o
0 19 2 2923.610 2747.440 42.842 2.039 o
0 19 3 542.987 529.807 14.631 29.128 o
0 19 4 866.726 824.691 22.003 14.373 o
0 19 5 17.665 28.672 8.636 401.713 o
0 19 6 727.785 713.069 24.122 16.930 o
0 19 7 4.794 34.717 11.597 267.492 o
0 19 8 985.411 947.299 30.409 10.691 o
0 19 9 34.929 18.477 12.979 198.295 o
0 19 10 45.037 54.934 14.439 150.156 o
0 20 0 107.919 149.013 11.310 133.699 o
0 20 1 1617.290 1575.070 26.525 5.610 o
0 20 2 344.582 326.056 9.284 57.345 o
0 20 3 41.499 57.469 7.719 335.711 o
0 20 4 3887.320 3682.900 73.331 1.131 o
0 20 5 2990.710 2874.190 59.218 1.799 o
0 20 6 1765.890 1664.830 43.374 4.354 o
0 20 7 258.170 244.892 15.998 59.523 o
0 20 8 0.572 9.481 11.868 282.389 o
0 20 9 145.279 145.538 15.771 87.521 o
0 21 1 358.971 372.935 10.246 51.443 o
0 21 2 70.087 71.133 7.025 279.973 o
0 21 3 6171.130 5891.590 102.077 0.488 o
0 21 4 63.975 70.756 9.650 222.962 o
0 21 5 734.113 719.506 23.217 17.059 o
0 21 6 178.943 193.098 14.824 80.389 o
0 21 7 1955.010 1900.220 49.188 3.549 o
0 21 8 113.381 116.668 14.462 109.081 o
0 21 9 710.821 643.373 26.178 17.122 o
0 22 0 1065.090 1064.150 30.574 9.544 o
0 22 1 359.192 354.659 10.040 52.719 o
0 22 2 32.440 17.792 6.507 524.338 o
0 22 3 106.873 138.375 10.912 141.044 o
0 22 4 1.541 -0.637 8.883 511.687 o
0 22 5 4852.880 4621.860 102.238 0.716 o
0 22 6 16.989 17.313 11.882 251.514 o
0 22 7 441.833 461.171 21.244 29.882 o
0 22 8 1.083 -8.298 12.505 260.887 o
0 22 9 286.319 282.342 22.026 41.535 o
0 23 1 352.473 361.004 11.232 51.439 o
0 23 2 354.812 344.955 11.281 51.989 o
0 23 3 3223.630 2990.580 61.304 1.614 o
0 23 4 286.800 307.721 14.140 56.769 o
0 23 5 105.691 134.142 13.742 114.936 o
0 23 6 837.222 821.417 28.024 13.377 o
0 23 7 1067.700 1057.830 33.664 9.127 o
0 23 8 648.036 635.384 26.055 18.416 o
0 23 9 370.524 341.343 22.123 34.925 o
0 24 0 1926.880 1953.580 45.913 3.650 o
0 24 1 28.846 44.831 6.983 437.905 o
0 24 2 25.165 40.167 7.598 422.190 o
0 24 3 272.063 296.468 20.236 45.522 o
0 24 4 1535.500 1460.220 34.975 5.698 o
0 24 5 1107.460 1015.590 31.082 9.343 o
0 24 6 1288.640 1254.230 36.924 6.973 o
0 24 7 45.402 58.412 14.071 154.959 o
0 24 8 3.021 11.881 13.785 207.685 o
0 25 1 27.009 30.093 6.731 501.189 o
0 25 2 1044.880 1013.210 23.759 10.866 o
0 25 3 9.843 4.453 8.889 459.875 o
0 25 4 534.057 514.983 18.604 27.241 o
0 25 5 0.433 1.581 11.703 297.390 o
0 25 6 377.156 368.920 19.717 36.993 o
0 25 7 233.877 241.266 18.319 56.060 o
0 25 8 1183.150 1109.370 36.204 7.943 o
0 26 0 1013.550 1113.610 34.952 9.126 o
0 26 1 55.799 47.154 7.305 328.953 o
0 26 2 506.382 530.202 17.616 28.719 o
0 26 3 597.149 597.388 19.408 23.261 o
0 26 4 85.203 84.856 13.190 139.740 o
0 26 5 1168.900 1181.610 35.324 7.918 o
0 26 6 472.167 451.824 21.831 28.340 o
0 26 7 502.536 474.490 23.108 25.843 o
0 26 8 50.989 69.692 15.769 125.755 o
0 27 1 737.341 717.010 18.505 18.534 o
0 27 2 446.586 478.487 17.070 33.120 o
0 27 3 1495.620 1517.570 55.589 4.550 o
0 27 4 768.940 789.999 27.195 14.705 o
0 27 5 0.799 9.200 12.780 244.450 o
0 27 6 4.610 23.933 13.325 214.136 o
0 27 7 584.627 628.563 26.425 19.609 o
0 28 0 75.610 77.849 13.122 147.407 o
0 28 1 3043.470 2982.490 60.862 1.720 o
0 28 2 138.138 153.415 11.740 115.859 o
0 28 3 9.785 39.766 10.965 281.569 o
0 28 4 200.952 227.689 16.583 66.505 o
0 28 5 1292.050 1282.190 37.788 6.820 o
0 28 6 191.486 206.067 17.590 65.693 o
0 28 7 378.943 411.111 29.091 25.538 o
0 29 1 303.531 426.787 16.195 45.241 o
0 29 2 302.026 314.808 16.560 49.663 o
0 29 3 1312.400 1285.110 32.401 7.168 o
0 29 4 243.438 254.611 17.310 57.075 o
0 29 5 112.694 128.354 15.934 96.177 o
0 29 6 77.652 73.225 15.564 117.858 o
0 30 0 1429.190 1464.380 55.518 4.768 o
0 30 1 307.024 341.373 17.019 47.135 o
0 30 2 463.442 507.498 20.423 28.778 o
0 30 3 66.191 125.201 26.508 49.827 o
0 30 4 212.478 235.191 17.351 61.829 o
0 30 5 225.184 245.770 18.185 57.145 o
0 30 6 449.498 456.421 23.628 27.535 o
0 31 1 74.290 126.115 13.413 132.474 o
0 31 2 1016.550 1075.950 31.933 9.674 o
0 31 3 4.365 3.832 14.669 186.118 o
0 31 4 666.975 730.859 27.224 16.733 o
0 31 5 3.473 10.226 13.927 203.935 o
0 32 0 1302.270 1357.310 53.691 5.356 o
0 32 1 1127.600 1283.780 42.678 7.085 o
0 32 2 383.734 411.616 19.153 36.115 o
0 32 3 19.602 23.045 17.000 129.937 o
0 32 4 173.095 190.329 19.645 61.480 o
0 32 5 5.942 14.410 14.640 181.989 o
0 33 1 411.285 520.707 26.536 25.259 o
0 33 2 69.000 95.857 13.759 137.718 o
0 33 3 374.526 449.398 24.863 29.209 o
0 33 4 34.581 29.206 16.707 127.360 o
0 34 0 79.582 116.464 29.099 41.995 o
0 34 1 1028.440 1092.830 39.119 8.513 o
0 34 2 13.671 3.009 19.880 100.550 o
0 34 3 3.670 26.034 16.183 148.645 o
0 35 1 176.853 258.469 21.273 52.409 o
0 35 2 269.870 313.874 28.507 31.219 o
1 0 0 7878.860 8026.610 230.514 0.234 o
1 0 2 1882.960 2028.000 52.094 3.474 o
1 0 4 15611.600 17343.700 349.012 0.067 o
1 0 6 2774.310 3123.820 135.304 1.112 o
1 0 8 259.742 238.822 14.339 64.422 o
1 0 10 376.774 379.734 19.493 36.996 o
1 1 0 2309.960 2291.270 42.717 2.887 o
1 1 1 3177.920 3154.180 49.082 1.684 o
1 1 2 7341.940 8025.600 118.596 0.325 o
1 1 3 739.937 766.271 15.988 18.669 o
1 1 4 372.415 400.742 10.687 48.045 o
1 1 5 745.472 758.967 15.223 18.831 o
1 1 6 3249.280 3579.100 53.666 1.504 o
1 1 7 5355.110 5514.790 86.969 0.615 o
1 1 8 459.903 456.535 13.427 36.237 o
1 1 9 714.340 734.267 36.011 13.104 o
1 1 10 79.816 79.603 14.575 126.723 o
1 1 11 124.799 149.909 19.314 71.763 o
1 2 0 215.000 201.570 6.326 107.038 o
1 2 1 2268.310 2374.890 43.100 2.880 o
1 2 2 526.875 526.985 10.786 32.207 o
1 2 3 2899.320 3133.410 46.080 1.889 o
1 2 4 1022.580 1067.080 21.185 11.162 o
1 2 5 8751.860 9455.760 135.921 0.235 o
1 2 6 292.895 322.820 8.250 67.041 o
1 2 7 219.888 270.912 12.319 74.703 o
1 2 8 377.010 362.322 12.089 47.678 o
1 2 9 2111.940 2009.610 38.925 3.463 o
1 2 10 129.856 130.747 12.341 118.650 o
1 2 11 75.775 109.018 16.051 107.969 o
1 3 0 72.776 71.503 2.903 378.102 o
1 3 1 28084.100 29182.500 490.550 0.024 o
1 3 2 205.674 202.395 5.288 114.165 o
1 3 3 4936.730 5164.320 74.701 0.722 o
1 3 4 267.716 286.532 6.658 78.566 o
1 3 5 1059.550 1110.330 18.571 10.887 o
1 3 6 285.206 317.500 8.227 68.890 o
1 3 7 10414.400 10559.200 162.550 0.174 o
1 3 8 124.496 135.298 8.581 155.640 o
1 3 9 629.649 637.679 18.478 22.179 o
1 3 10 24.324 15.133 10.676 290.106 o
1 3 11 680.515 684.982 28.281 16.495 o
1 4 0 2343.960 2202.110 46.345 2.836 o
1 4 1 6478.720 6708.760 111.073 0.421 o
1 4 2 4957.140 4995.600 113.974 0.647 o
1 4 3 406.457 394.676 8.461 47.361 o
1 4 4 5469.050 5768.070 86.509 0.586 o
1 4 5 3101.160 3150.570 47.164 1.744 o
1 4 6 1083.450 1174.400 25.894 9.570 o
1 4 7 173.092 208.803 19.727 60.131 o
1 4 8 17.461 34.832 11.449 254.550 o
1 4 9 3187.450 3159.090 62.119 1.583 o
1 4 10 253.953 260.419 15.059 61.673 o
1 4 11 354.877 387.702 26.447 29.357 o
1 5 0 340.442 351.454 7.181 59.037 o
1 5 1 631.682 629.626 12.141 24.848 o
1 5 2 3124.940 3224.980 54.917 1.653 o
1 5 3 361.353 353.056 7.969 55.201 o
1 5 4 40.191 44.135 4.202 563.700 o
1 5 5 1005.690 1033.590 17.507 11.986 o
1 5 6 2474.160 2612.870 43.004 2.505 o
1 5 7 2744.060 2723.700 45.611 2.168 o
1 5 8 1515.300 1523.900 41.714 5.281 o
1 5 9 27.902 53.713 19.406 96.607 o
1 5 10 112.748 169.352 18.006 78.867 o
1 5 11 141.210 144.193 14.106 99.236 o
1 6 0 5899.590 5601.490 81.946 0.553 o
1 6 1 2043.150 2020.260 32.344 3.725 o
1 6 2 1014.670 998.931 31.598 10.037 o
1 6 3 2724.670 2818.750 44.680 2.154 o
1 6 4 530.026 555.863 11.443 30.952 o
1 6 5 224.226 237.647 6.497 97.091 o
1 6 6 540.939 530.016 12.209 30.631 o
1 6 7 133.886 144.496 10.287 131.533 o
1 6 8 2081.960 2127.030 39.804 3.395 o
1 6 9 328.977 347.266 15.942 46.880 o
1 6 10 1288.290 1282.280 34.687 7.102 o
1 6 11 1.029 13.961 12.057 269.731 o
1 7 0 4109.260 3884.950 59.864 1.086 o
1 7 1 1140.960 1126.290 17.609 10.144 o
1 7 2 3194.740 3207.630 59.912 1.583 o
1 7 3 1630.380 1636.450 29.625 5.333 o
1 7 4 895.995 941.030 28.085 12.010 o
1 7 5 458.421 465.385 10.736 38.241 o
1 7 6 3020.250 3068.610 49.894 1.800 o
1 7 7 9.401 16.701 6.359 739.006 o
1 7 8 1746.320 1729.460 33.535 4.700 o
1 7 9 0.767 14.936 10.004 383.422 o
1 7 10 435.038 418.937 27.073 25.610 o
1 7 11 196.309 199.601 15.960 71.733 o
1 8 0 4066.370 3836.120 59.150 1.109 o
1 8 1 2777.990 2636.510 77.553 1.801 o
1 8 2 725.637 715.110 18.155 18.922 o
1 8 3 6928.810 6694.850 122.314 0.381 o
1 8 4 90.771 94.144 5.018 263.822 o
1 8 5 2857.930 2888.490 46.817 2.000 o
1 8 6 214.290 210.761 9.276 94.421 o
1 8 7 339.963 354.112 22.779 35.258 o
1 8 8 879.957 883.241 20.122 14.153 o
1 8 9 1348.910 1320.570 34.673 6.734 o
1 8 10 249.741 258.582 15.557 60.954 o
1 8 11 1144.860 1062.220 32.111 8.792 o
1 9 0 2030.040 1998.390 30.211 3.819 o
1 9 1 5549.650 5365.040 105.391 0.571 o
1 9 2 67.273 67.287 6.891 293.179 o
1 9 3 5431.970 5248.790 147.722 0.512 o
1 9 4 45.347 47.035 4.761 488.407 o
1 9 5 1481.660 1405.330 24.820 6.578 o
1 9 6 587.959 622.095 25.767 19.934 o
1 9 7 1730.370 1741.920 33.521 4.726 o
1 9 8 140.949 167.576 10.368 122.282 o
1 9 9 36.584 47.873 10.807 240.948 o
1 9 10 5.635 7.175 11.531 291.536 o
1 9 11 925.155 918.733 35.439 10.419 o
1 10 0 7563.710 7079.810 139.010 0.324 o
1 10 1 948.161 893.302 16.039 13.811 o
1 10 2 377.032 355.785 8.672 52.332 o
1 10 3 4043.230 3958.580 67.827 1.066 o
1 10 4 9.845 16.639 7.036 631.777 o
1 10 5 4858.230 4730.540 80.303 0.760 o
1 10 6 136.495 155.825 13.860 100.595 o
1 10 7 95.195 91.221 7.566 215.138 o
1 10 8 474.076 492.151 31.907 20.186 o
1 10 9 1558.100 1477.850 33.922 5.645 o
1 10 10 662.210 652.314 27.949 17.208 o
1 10 11 708.125 653.035 34.204 14.216 o
1 11 0 794.013 781.844 13.523 17.915 o
1 11 1 2528.440 2438.980 36.671 2.621 o
1 11 2 3089.120 2891.940 50.426 1.808 o
1 11 3 2554.900 2431.060 67.849 2.152 o
1 11 4 0.588 -3.065 4.585 1906.900 o
1 11 5 343.691 339.002 10.377 54.988 o
1 11 6 1054.310 1093.470 22.655 10.546 o
1 11 7 1877.860 1822.300 34.855 4.215 o
1 11 8 805.925 799.623 24.920 14.731 o
1 11 9 56.724 46.105 9.280 259.912 o
1 11 10 152.661 170.074 14.557 90.067 o
1 11 11 234.408 235.165 20.948 49.340 o
1 12 0 6703.560 6428.810 93.921 0.430 o
1 12 1 311.984 280.938 6.793 69.874 o
1 12 2 1173.040 1143.030 22.265 9.378 o
1 12 3 427.461 429.574 10.030 42.492 o
1 12 4 5133.860 4885.970 91.633 0.679 o
1 12 5 1493.800 1470.710 30.030 6.107 o
1 12 6 843.338 846.644 19.975 15.007 o
1 12 7 151.547 144.283 8.505 137.171 o
1 12 8 1239.590 1237.370 29.416 7.943 o
1 12 9 3.253 6.276 9.465 432.123 o
1 12 10 1936.590 1733.930 53.393 3.584 o
1 13 0 6411.170 6113.950 88.888 0.471 o
1 13 1 81.881 68.797 4.955 309.644 o
1 13 2 5626.960 5402.190 91.592 0.582 o
1 13 3 134.587 158.666 7.043 154.935 o
1 13 4 13.961 12.025 6.881 637.540 o
1 13 5 129.525 145.658 8.339 151.253 o
1 13 6 3027.420 3077.290 54.685 1.754 o
1 13 7 16.045 13.588 8.691 431.772 o
1 13 8 2780.750 2643.800 54.273 2.076 o
1 13 9 15.799 26.323 9.688 345.597 o
1 13 10 13.790 41.146 15.773 147.358 o
1 14 0 74.055 87.371 9.765 200.347 o
1 14 1 287.683 288.661 10.461 66.281 o
1 14 2 2048.030 1981.560 36.315 3.662 o
1 14 3 5317.490 5250.330 102.370 0.610 o
1 14 4 3744.630 3601.720 69.316 1.210 o
1 14 5 1854.920 1748.090 37.298 4.276 o
1 14 6 1621.940 1658.370 32.242 5.215 o
1 14 7 0.085 -4.556 8.072 629.045 o
1 14 8 228.161 234.008 12.927 74.545 o
1 14 9 498.063 466.040 17.315 30.709 o
1 14 10 431.197 414.595 23.870 28.737 o
1 15 0 479.507 451.257 9.868 37.908 o
1 15 1 7572.860 7209.020 104.692 0.343 o
1 15 2 112.540 108.818 6.537 200.670 o
1 15 3 3492.310 3328.380 58.733 1.419 o
1 15 4 52.578 61.222 7.683 306.041 o
1 15 5 497.478 499.714 13.636 32.695 o
1 15 6 115.746 105.559 7.375 188.339 o
1 15 7 676.450 650.721 19.083 20.516 o
1 15 8 156.695 155.062 11.452 110.718 o
1 15 9 52.874 48.533 12.550 180.977 o
1 15 10 13.191 1.515 15.318 166.502 o
1 16 0 138.106 132.122 6.329 168.237 o
1 16 1 29.991 49.536 10.926 244.911 o
1 16 2 415.979 396.389 11.252 43.646 o
1 16 3 8854.370 8469.980 147.584 0.243 o
1 16 4 1988.580 1881.460 39.395 3.790 o
1 16 5 5012.950 4960.460 89.578 0.696 o
1 16 6 185.522 207.303 10.423 98.423 o
1 16 7 84.554 77.689 13.617 136.466 o
1 16 8 0.950 5.909 9.240 462.876 o
1 16 9 583.652 532.380 22.125 23.123 o
1 16 10 131.673 146.111 15.424 92.754 o
1 17 0 1817.880 1647.630 27.067 4.832 o
1 17 1 992.235 903.262 17.928 12.875 o
1 17 2 6417.550 6114.780 104.346 0.455 o
1 17 3 1197.610 1101.300 23.175 9.262 o
1 17 4 121.855 114.719 15.726 97.080 o
1 17 5 163.687 152.263 10.141 117.549 o
1 17 6 1419.970 1402.740 28.844 6.634 o
1 17 7 499.899 494.901 18.316 29.214 o
1 17 8 986.818 904.373 30.214 10.904 o
1 17 9 16.070 40.271 12.979 205.392 o
1 17 10 1.704 20.687 13.432 215.266 o
1 18 0 1672.300 1604.710 26.704 5.361 o
1 18 1 144.862 146.253 7.257 150.464 o
1 18 2 1753.880 1716.910 33.242 4.707 o
1 18 3 30.380 27.993 7.845 409.475 o
1 18 4 8658.130 8257.510 152.840 0.250 o
1 18 5 40.273 28.448 8.527 340.152 o
1 18 6 855.575 848.393 22.592 14.232 o
1 18 7 57.479 50.785 9.765 241.233 o
1 18 8 176.018 165.240 14.645 84.796 o
1 18 9 126.153 127.117 15.160 98.387 o
1 19 0 962.543 940.408 17.698 13.051 o
1 19 1 181.505 179.868 13.665 86.886 o
1 19 2 7157.090 6811.790 116.100 0.369 o
1 19 3 173.680 167.601 14.875 83.870 o
1 19 4 8.492 15.944 17.346 130.316 o
1 19 5 205.346 223.132 11.702 85.171 o
1 19 6 1150.400 1107.320 27.475 9.140 o
1 19 7 213.315 231.736 13.063 77.122 o
1 19 8 293.682 273.998 17.169 51.139 o
1 19 9 104.633 101.258 14.880 110.785 o
1 20 0 4258.150 3980.470 64.557 1.014 o
1 20 1 54.084 48.739 6.500 363.993 o
1 20 2 254.302 261.604 24.335 39.755 o
1 20 3 658.715 642.087 18.757 21.211 o
1 20 4 2769.840 2622.340 53.800 2.098 o
1 20 5 686.460 663.737 19.676 19.886 o
1 20 6 16.325 27.732 9.273 366.491 o
1 20 7 45.458 47.412 12.526 187.779 o
1 20 8 437.013 422.908 20.470 31.669 o
1 20 9 379.826 377.043 20.874 35.136 o
1 21 0 268.213 288.010 10.114 70.494 o
1 21 1 2486.240 2307.290 40.017 2.702 o
1 21 2 13.997 4.766 7.162 629.299 o
1 21 3 1196.960 1189.470 28.586 8.428 o
1 21 4 87.345 85.773 9.926 185.760 o
1 21 5 12.912 9.501 11.801 265.971 o
1 21 6 42.622 40.277 9.517 280.699 o
1 21 7 1124.530 1087.880 33.221 8.706 o
1 21 8 3.472 7.444 13.142 229.523 o
1 21 9 65.150 79.840 15.472 122.119 o
1 22 0 58.443 61.737 7.285 306.022 o
1 22 1 1686.640 1615.950 29.879 5.175 o
1 22 2 122.384 120.173 9.036 157.411 o
1 22 3 17.552 32.597 8.912 377.707 o
1 22 4 494.924 461.704 16.986 31.220 o
1 22 5 59.192 67.176 14.389 140.791 o
1 22 6 40.170 40.621 9.753 276.150 o
1 22 7 160.833 184.119 15.845 79.930 o
1 22 8 2.368 -4.475 13.452 224.298 o
1 22 9 1077.790 1052.690 35.017 8.892 o
1 23 0 85.166 85.186 8.463 214.376 o
1 23 1 990.637 956.908 21.217 12.085 o
1 23 2 1030.260 1015.420 25.815 10.703 o
1 23 3 271.070 272.074 13.051 63.862 o
1 23 4 127.798 147.717 11.466 123.444 o
1 23 5 315.715 338.629 17.305 45.997 o
1 23 6 670.894 667.757 24.680 18.219 o
1 23 7 527.811 530.602 23.087 24.187 o
1 23 8 100.071 112.326 16.723 95.495 o
1 24 0 3447.030 3351.970 61.267 1.419 o
1 24 1 17.997 23.252 7.347 516.478 o
1 24 2 18.103 36.047 9.443 340.796 o
1 24 3 1055.350 1084.510 40.520 8.194 o
1 24 4 2256.240 2112.230 54.628 2.833 o
1 24 5 125.856 134.458 13.783 107.686 o
1 24 6 84.798 107.537 14.114 124.220 o
1 24 7 5.362 -6.872 12.857 241.629 o
1 24 8 492.971 508.555 23.825 25.073 o
1 25 0 650.824 707.211 18.719 20.592 o
1 25 1 15.068 16.636 8.120 477.613 o
1 25 2 3055.430 3042.320 62.173 1.685 o
1 25 3 43.851 52.701 10.231 245.302 o
1 25 4 93.606 89.275 12.642 141.199 o
1 25 5 6.833 -9.177 10.981 324.801 o
1 25 6 863.436 878.355 29.658 12.365 o
1 25 7 140.669 140.583 15.949 88.028 o
1 25 8 468.813 424.610 22.741 28.189 o
1 26 0 337.048 371.518 13.662 48.782 o
1 26 1 752.882 747.805 20.691 17.240 o
1 26 2 147.174 185.203 22.288 55.231 o
1 26 3 91.245 97.649 11.122 160.029 o
1 26 4 1696.650 1646.300 43.615 4.529 o
1 26 5 6.051 7.611 11.906 273.402 o
1 26 6 259.651 256.936 17.629 54.343 o
1 26 7 142.467 153.354 16.408 83.635 o
1 27 0 164.363 181.867 14.904 84.189 o
1 27 1 1115.960 1111.580 31.059 8.948 o
1 27 2 884.111 951.049 41.942 9.397 o
1 27 3 235.986 254.353 14.198 67.255 o
1 27 4 13.759 7.604 13.193 217.140 o
1 27 5 545.387 545.349 24.949 22.316 o
1 27 6 256.138 267.351 18.148 52.870 o
1 27 7 736.648 782.778 29.675 14.469 o
1 28 0 308.699 324.908 14.824 51.925 o
1 28 1 266.989 297.904 14.432 59.156 o
1 28 2 205.985 194.857 14.822 75.073 o
1 28 3 1225.300 1212.170 34.947 7.570 o
1 28 4 271.719 260.355 16.712 55.169 o
1 28 5 863.308 910.195 30.612 11.991 o
1 28 6 2.104 6.547 13.823 209.793 o
1 29 0 370.173 358.378 15.748 43.313 o
1 29 1 1047.160 1053.740 28.743 9.976 o
1 29 2 95.019 97.185 15.274 110.975 o
1 29 3 262.796 275.690 17.097 54.354 o
1 29 4 1.994 1.785 12.209 270.869 o
1 29 5 196.229 185.066 16.758 69.718 o
1 29 6 567.266 656.863 26.937 19.423 o
1 30 0 246.528 256.645 16.193 59.696 o
1 30 1 0.376 29.444 10.864 313.642 o
1 30 2 240.205 272.393 16.779 57.881 o
1 30 3 302.786 312.683 20.383 42.434 o
1 30 4 687.234 749.562 27.303 16.215 o
1 30 5 194.550 184.179 16.462 71.239 o
1 31 0 1410.450 1498.070 49.579 5.146 o
1 31 1 0.222 4.284 11.773 291.862 o
1 31 2 1203.670 1251.430 36.398 7.438 o
1 31 3 7.232 5.052 13.864 204.701 o
1 31 4 9.846 37.163 13.470 199.326 o
1 31 5 4.930 -0.375 13.498 220.193 o
1 32 0 565.045 671.457 28.525 18.548 o
1 32 1 5.512 1.193 13.958 205.210 o
1 32 2 72.070 116.585 16.329 105.447 o
1 32 3 423.895 469.987 24.992 26.982 o
1 32 4 578.796 549.252 28.036 19.738 o
1 33 0 21.752 41.757 15.333 150.758 o
1 33 1 769.016 796.859 31.703 13.386 o
1 33 2 206.901 195.293 23.444 46.735 o
1 33 3 586.194 614.526 35.026 15.729 o
1 34 0 159.723 206.439 19.354 63.188 o
1 34 1 8.113 50.214 20.211 93.865 o
1 34 2 128.417 120.420 30.574 36.611 o
2 0 0 1990.400 1928.660 59.539 3.166 o
2 0 2 2358.530 2328.660 49.807 2.682 o
2 0 4 2876.700 3040.780 64.944 1.763 o
2 0 6 2638.130 2593.450 118.911 1.379 o
2 0 8 5594.300 5193.120 151.714 0.493 o
2 0 10 740.211 735.947 33.430 13.583 o
2 1 0 2809.990 2814.290 59.785 1.931 o
2 1 1 137.946 139.880 5.121 175.062 o
2 1 2 1106.050 1093.540 18.020 10.576 o
2 1 3 140.790 143.190 5.238 170.353 o
2 1 4 3040.120 3071.900 72.263 1.596 o
2 1 5 2053.960 2081.360 38.185 3.518 o
2 1 6 6002.970 5822.370 98.777 0.510 o
2 1 7 1260.020 1199.280 25.381 8.289 o
2 1 8 108.558 162.093 27.795 42.757 o
2 1 9 1.998 7.922 9.587 423.354 o
2 1 10 297.350 303.175 15.509 52.864 o
2 2 0 100.154 87.866 8.985 188.489 o
2 2 1 361.214 343.513 11.081 51.658 o
2 2 2 81.615 87.900 4.199 303.617 o
2 2 3 774.376 788.087 13.955 18.175 o
2 2 4 627.011 618.778 18.804 22.374 o
2 2 5 34.964 72.798 22.041 74.672 o
2 2 6 197.905 196.596 15.997 71.569 o
2 2 7 1174.020 1122.810 26.259 9.046 o
2 2 8 1241.870 1167.500 27.738 8.294 o
2 2 9 1292.290 1168.820 30.994 7.696 o
2 2 10 81.984 74.751 11.196 173.522 o
2 3 0 2083.190 2001.290 35.217 3.604 o
2 3 1 8464.640 8572.460 233.289 0.211 o
2 3 2 246.905 242.476 6.873 88.659 o
2 3 3 639.583 660.074 13.984 23.393 o
2 3 4 103.089 104.789 5.891 223.105 o
2 3 5 4023.520 3973.030 68.444 1.067 o
2 3 6 437.640 390.707 13.088 40.259 o
2 3 7 1198.380 1152.970 26.810 8.714 o
2 3 8 289.544 274.317 20.468 44.576 o
2 3 9 25.683 40.539 9.424 318.326 o
2 3 10 4.116 6.257 10.224 370.888 o
2 4 0 308.948 290.298 7.991 67.541 o
2 4 1 7.699 6.848 7.572 614.878 o
2 4 2 989.341 963.325 16.142 12.776 o
2 4 3 8834.040 8907.040 136.706 0.241 o
2 4 4 462.138 462.035 11.836 37.242 o
2 4 5 855.222 928.481 18.137 14.566 o
2 4 6 937.707 897.445 21.805 12.970 o
2 4 7 606.836 586.089 17.183 24.255 o
2 4 8 1264.590 1108.570 26.724 8.432 o
2 4 9 297.256 270.878 13.157 60.010 o
2 4 10 454.135 435.918 18.267 32.698 o
2 5 0 1704.040 1623.900 27.015 5.214 o
2 5 1 6970.820 6828.010 142.629 0.357 o
2 5 2 1728.060 1660.540 30.267 4.967 o
2 5 3 1943.060 1970.480 36.998 3.857 o
2 5 4 1850.100 1795.170 36.117 4.271 o
2 5 5 995.724 997.855 20.762 11.867 o
2 5 6 3172.760 3003.050 58.377 1.661 o
2 5 7 16.102 13.162 7.726 518.990 o
2 5 8 92.856 105.227 10.035 171.584 o
2 5 9 1.306 2.838 8.773 517.730 o
2 5 10 682.856 642.478 25.675 17.835 o
2 6 0 157.473 164.391 13.404 96.386 o
2 6 1 42.121 45.546 12.654 188.453 o
2 6 2 5342.270 5386.910 130.957 0.545 o
2 6 3 1087.070 1089.970 19.877 10.580 o
2 6 4 6064.590 5801.360 90.633 0.515 o
2 6 5 0.585 35.029 6.229 757.177 o
2 6 6 1.433 15.763 7.415 652.931 o
2 6 7 35.401 30.097 8.016 378.314 o
2 6 8 1603.050 1451.550 32.887 5.588 o
2 6 9 85.873 86.954 10.255 181.064 o
2 6 10 336.410 346.853 17.761 43.263 o
2 7 0 14650.800 14276.800 208.348 0.093 o
2 7 1 752.782 734.626 17.923 18.191 o
2 7 2 6407.170 6305.100 105.982 0.446 o
2 7 3 175.927 192.438 9.252 110.295 o
2 7 4 462.943 460.367 19.239 30.810 o
2 7 5 230.067 261.312 10.746 78.825 o
2 7 6 3201.120 3018.320 58.766 1.639 o
2 7 7 545.031 520.134 16.256 28.241 o
2 7 8 172.792 166.192 10.993 106.066 o
2 7 9 71.127 71.450 10.045 205.875 o
2 7 10 708.708 660.154 23.815 17.887 o
2 8 0 1426.930 1409.860 24.429 6.845 o
2 8 1 1270.950 1203.740 19.750 8.646 o
2 8 2 747.489 739.136 15.552 18.923 o
2 8 3 5749.550 5546.430 102.855 0.544 o
2 8 4 1822.450 1763.690 32.986 4.476 o
2 8 5 2272.840 2282.660 66.795 2.473 o
2 8 6 39.783 37.885 7.868 360.754 o
2 8 7 238.728 238.902 13.498 70.298 o
2 8 8 399.303 383.248 14.651 41.597 o
2 8 9 701.038 657.531 20.070 19.471 o
2 8 10 92.875 84.311 13.401 133.669 o
2 9 0 153.346 150.099 5.623 155.400 o
2 9 1 6804.590 6568.310 96.605 0.416 o
2 9 2 34.709 40.527 6.545 449.909 o
2 9 3 597.254 601.599 16.144 24.823 o
2 9 4 432.973 401.670 11.518 41.781 o
2 9 5 2012.930 2123.660 39.334 3.526 o
2 9 6 458.136 422.852 22.259 29.063 o
2 9 7 1681.230 1570.020 34.645 5.065 o
2 9 8 26.400 31.339 10.326 286.531 o
2 9 9 174.845 176.960 12.498 95.091 o
2 9 10 39.508 31.346 12.463 201.259 o
2 10 0 50.293 47.960 6.906 359.390 o
2 10 1 542.724 519.763 14.255 29.591 o
2 10 2 2253.530 2095.170 38.102 3.186 o
2 10 3 3492.350 3332.640 64.257 1.386 o
2 10 4 848.834 801.565 17.948 15.727 o
2 10 5 935.563 944.889 20.745 12.885 o
2 10 6 494.102 466.153 13.585 33.824 o
2 10 7 1300.020 1217.760 28.543 7.728 o
2 10 8 4.772 7.553 8.336 535.037 o
2 10 9 992.650 914.067 24.793 11.729 o
2 10 10 10.457 15.146 11.974 258.546 o
2 11 0 6142.580 5811.840 91.743 0.506 o
2 11 1 512.079 482.492 10.629 34.359 o
2 11 2 1314.860 1268.180 25.033 7.775 o
2 11 3 1.863 12.224 7.742 615.571 o
2 11 4 248.830 256.384 10.945 74.868 o
2 11 5 1629.800 1538.870 30.327 5.468 o
2 11 6 304.399 304.781 12.155 58.988 o
2 11 7 645.098 605.164 18.134 22.354 o
2 11 8 1.641 4.700 8.677 521.812 o
2 11 9 91.306 98.116 13.032 135.487 o
2 11 10 1056.430 992.272 33.693 9.431 o
2 12 0 197.708 182.209 8.787 106.574 o
2 12 1 586.254 579.047 13.503 26.913 o
2 12 2 6471.480 6003.800 115.701 0.443 o
2 12 3 410.341 383.278 11.543 44.371 o
2 12 4 4001.230 3772.880 72.940 1.085 o
2 12 5 484.158 492.916 13.847 33.437 o
2 12 6 39.209 40.613 9.740 278.300 o
2 12 7 552.906 539.270 15.542 27.962 o
2 12 8 928.494 864.328 23.362 13.001 o
2 12 9 81.866 85.168 12.817 146.217 o
2 12 10 581.096 550.402 22.716 22.605 o
2 13 0 1530.650 1407.550 23.050 6.440 o
2 13 1 1696.120 1592.960 32.440 5.079 o
2 13 2 651.705 638.473 16.979 22.180 o
2 13 3 346.986 338.312 11.036 53.623 o
2 13 4 1696.480 1582.350 34.402 5.012 o
2 13 5 12.439 30.784 7.157 546.296 o
2 13 6 1991.280 1925.870 37.217 3.800 o
2 13 7 169.076 168.276 10.931 107.363 o
2 13 8 87.749 88.602 10.455 175.679 o
2 13 9 81.105 86.747 12.992 143.882 o
2 14 0 514.073 472.647 11.206 34.170 o
2 14 1 562.752 522.958 13.030 29.324 o
2 14 2 534.441 484.640 15.701 29.823 o
2 14 3 2271.240 2150.530 44.134 3.005 o
2 14 4 1009.880 935.353 20.998 12.023 o
2 14 5 306.402 290.318 11.166 61.761 o
2 14 6 254.733 229.471 10.667 77.239 o
2 14 7 756.597 724.452 30.640 14.297 o
2 14 8 911.359 864.832 27.128 12.450 o
2 14 9 1137.660 1066.720 38.420 8.054 o
2 15 0 25.953 27.234 5.234 664.801 o
2 15 1 1459.130 1350.860 29.409 6.540 o
2 15 2 1107.140 1068.650 24.906 9.921 o
2 15 3 435.086 427.550 14.185 38.043 o
2 15 4 34.495 46.503 7.994 357.339 o
2 15 5 2246.760 2092.700 36.712 3.224 o
2 15 6 136.755 112.583 8.874 152.099 o
2 15 7 985.359 952.258 22.729 11.936 o
2 15 8 0.379 -0.310 10.993 338.641 o
2 15 9 361.488 355.468 29.294 26.640 o
2 16 0 71.393 66.041 7.245 276.400 o
2 16 1 894.003 864.897 21.222 13.867 o
2 16 2 70.957 63.113 7.797 264.978 o
2 16 3 2538.220 2440.620 49.691 2.435 o
2 16 4 192.365 186.879 10.580 98.672 o
2 16 5 166.679 183.720 9.110 116.473 o
2 16 6 0.457 0.592 6.855 861.657 o
2 16 7 1229.900 1194.730 26.659 8.383 o
2 16 8 367.449 351.482 17.651 41.016 o
2 16 9 2033.070 1891.790 48.499 3.447 o
2 17 0 616.101 576.583 15.039 25.129 o
2 17 1 305.770 282.594 11.412 61.892 o
2 17 2 15.696 7.346 7.381 578.185 o
2 17 3 575.769 579.635 18.755 24.550 o
2 17 4 254.220 250.050 11.997 71.312 o
2 17 5 1223.520 1146.410 27.931 8.460 o
2 17 6 1478.320 1418.030 27.452 6.423 o
2 17 7 987.854 911.138 23.081 12.079 o
2 17 8 191.840 221.106 17.830 63.770 o
2 17 9 69.908 83.276 13.921 138.188 o
2 18 0 387.491 347.329 11.763 47.824 o
2 18 1 72.858 77.703 8.339 237.388 o
2 18 2 959.007 933.724 27.232 11.555 o
2 18 3 27.551 25.618 9.416 331.701 o
2 18 4 1000.670 966.310 24.685 11.394 o
2 18 5 296.018 288.207 13.427 58.424 o
2 18 6 0.729 7.618 8.303 563.974 o
2 18 7 19.385 26.130 8.855 385.735 o
2 18 8 1326.290 1261.490 32.096 7.182 o
2 18 9 25.858 15.352 12.966 208.231 o
2 19 0 2788.400 2706.420 50.060 2.092 o
2 19 1 8.033 1.086 8.840 480.630 o
2 19 2 1258.000 1252.520 39.562 6.879 o
2 19 3 412.957 404.114 14.779 39.704 o
2 19 4 156.140 160.982 11.243 111.268 o
2 19 5 410.500 432.909 16.078 37.462 o
2 19 6 1131.390 1055.390 25.259 9.736 o
2 19 7 15.708 19.750 8.934 403.360 o
2 19 8 43.114 44.423 11.259 222.075 o
2 20 0 56.799 71.126 8.181 271.853 o
2 20 1 256.666 261.456 14.351 63.207 o
2 20 2 2825.440 2739.520 62.227 1.919 o
2 20 3 1123.170 1037.030 25.975 9.790 o
2 20 4 2287.190 2263.660 48.086 2.836 o
2 20 5 27.537 44.566 15.194 149.494 o
2 20 6 115.535 117.987 10.216 149.476 o
2 20 7 404.398 397.651 16.563 38.417 o
2 20 8 278.097 277.979 15.294 56.912 o
2 21 0 539.857 541.802 20.264 25.465 o
2 21 1 3255.000 3112.570 71.110 1.492 o
2 21 2 193.982 197.333 13.905 81.069 o
2 21 3 4.452 16.433 14.420 187.667 o
2 21 4 6.218 15.088 9.209 425.380 o
2 21 5 925.442 961.322 28.552 11.514 o
2 21 6 4.294 4.069 8.619 515.422 o
2 21 7 811.222 756.790 23.217 15.430 o
2 21 8 3.820 -13.889 11.013 329.584 o
2 22 0 283.847 276.919 16.005 54.633 o
2 22 1 1161.970 1171.800 33.009 8.238 o
2 22 2 18.038 32.904 10.979 272.989 o
2 22 3 3175.940 3086.540 62.667 1.603 o
2 22 4 3.133 3.871 9.573 427.837 o
2 22 5 903.372 934.302 30.320 11.528 o
2 22 6 110.133 109.558 10.461 152.579 o
2 22 7 48.575 42.177 11.048 222.824 o
2 23 0 1075.820 1085.270 36.616 8.589 o
2 23 1 2316.640 2181.870 59.256 2.631 o
2 23 2 568.122 583.080 21.967 22.935 o
2 23 3 24.214 16.993 13.550 193.738 o
2 23 4 100.573 112.327 13.913 119.235 o
2 23 5 480.011 512.707 20.656 27.845 o
2 23 6 525.236 503.465 22.238 25.262 o
2 23 7 212.398 176.888 13.723 80.171 o
2 24 0 89.084 111.851 13.242 130.968 o
2 24 1 108.312 129.023 13.181 119.983 o
2 24 2 1449.550 1456.680 39.641 5.726 o
2 24 3 749.884 727.409 25.694 15.919 o
2 24 4 1614.090 1656.560 38.871 4.945 o
2 24 5 34.238 22.762 11.516 237.981 o
2 24 6 72.072 78.347 11.683 171.444 o
2 24 7 45.706 29.017 11.206 229.495 o
2 25 0 2532.210 2478.140 63.350 2.220 o
2 25 1 229.156 246.146 24.640 41.021 o
2 25 2 764.598 819.934 27.429 14.490 o
2 25 3 69.148 74.766 13.046 152.943 o
2 25 4 6.069 4.843 10.649 340.387 o
2 25 5 31.686 44.760 11.762 220.754 o
2 25 6 602.466 584.068 20.770 22.599 o
2 26 0 86.834 125.166 15.374 108.259 o
2 26 1 120.094 134.940 17.049 86.300 o
2 26 2 84.565 98.054 13.904 128.544 o
2 26 3 480.554 485.422 21.526 27.647 o
2 26 4 32.329 30.015 12.631 204.246 o
2 26 5 105.573 134.035 13.420 117.888 o
2 26 6 1.949 3.138 11.408 308.315 o
2 27 0 22.400 39.674 13.038 198.497 o
2 27 1 1316.270 1394.670 73.563 3.976 o
2 27 2 274.183 281.395 17.487 51.969 o
2 27 3 0.627 4.910 12.446 260.557 o
2 27 4 157.666 155.892 15.608 84.649 o
2 27 5 887.058 885.137 35.442 10.872 o
2 27 6 318.691 325.540 16.979 46.885 o
2 28 0 0.385 1.396 12.875 246.193 o
2 28 1 134.409 136.760 18.072 77.590 o
2 28 2 48.200 44.232 16.003 128.712 o
2 28 3 1294.030 1327.600 44.943 6.119 o
2 28 4 258.616 273.910 18.126 52.355 o
2 28 5 89.003 115.437 18.032 88.256 o
2 29 0 402.512 394.069 20.540 33.937 o
2 29 1 439.337 472.254 26.345 25.302 o
2 29 2 589.234 635.795 29.979 17.750 o
2 29 3 0.957 -10.625 13.319 230.264 o
2 29 4 9.847 7.813 13.665 206.824 o
2 30 0 73.242 97.682 15.103 119.975 o
2 30 1 3.146 31.314 16.866 136.565 o
2 30 2 222.566 257.114 21.755 47.442 o
2 30 3 98.293 101.288 15.651 105.995 o
2 30 4 189.206 235.833 20.785 53.720 o
2 31 0 367.007 411.450 21.685 33.912 o
2 31 1 54.876 60.934 18.221 100.289 o
2 31 2 62.455 57.547 17.578 104.709 o
2 31 3 10.264 5.137 16.705 141.532 o
2 32 0 189.577 223.874 19.093 59.559 o
2 32 1 80.085 122.844 19.174 81.758 o
3 0 0 249.400 378.792 18.651 47.279 o
3 0 2 7309.100 7411.780 174.757 0.301 o
3 0 4 662.706 741.918 24.784 17.623 o
3 0 6 729.699 771.961 32.826 13.675 o
3 0 8 859.414 815.436 35.976 11.301 o
3 1 0 7339.090 7239.640 138.007 0.332 o
3 1 1 937.692 926.121 17.782 13.462 o
3 1 2 1163.440 1172.980 41.498 7.300 o
3 1 3 33.243 41.267 6.380 465.995 o
3 1 4 817.680 913.734 20.230 14.829 o
3 1 5 147.386 143.303 9.778 129.487 o
3 1 6 136.204 126.684 11.174 126.902 o
3 1 7 0.306 12.890 9.797 403.608 o
3 1 8 50.256 66.462 11.908 188.966 o
3 1 9 355.644 375.709 18.035 40.442 o
3 2 0 50.843 51.975 8.660 285.092 o
3 2 1 1495.900 1578.240 27.444 6.019 o
3 2 2 1128.460 1194.430 23.845 9.368 o
3 2 3 886.879 907.325 19.663 13.971 o
3 2 4 11.122 32.989 7.680 496.330 o
3 2 5 69.106 110.779 16.843 102.555 o
3 2 6 330.478 328.444 14.697 49.781 o
3 2 7 717.327 689.905 22.266 17.985 o
3 2 8 524.607 460.253 18.801 28.543 o
3 2 9 185.401 182.622 14.608 81.150 o
3 3 0 95.637 101.298 7.307 212.923 o
3 3 1 1792.370 1820.120 42.499 4.155 o
3 3 2 342.660 354.725 10.891 53.394 o
3 3 3 1223.390 1224.190 24.776 8.498 o
3 3 4 266.251 266.247 11.269 69.812 o
3 3 5 1845.250 1796.280 38.146 4.215 o
3 3 6 30.778 38.826 9.642 299.667 o
3 3 7 30.146 50.355 10.660 252.788 o
3 3 8 160.169 177.089 16.017 79.883 o
3 3 9 803.422 808.002 30.365 13.274 o
3 4 0 87.243 121.520 17.517 91.593 o
3 4 1 2700.680 2659.860 52.050 2.159 o
3 4 2 600.779 610.179 14.870 25.155 o
3 4 3 1539.570 1597.920 33.634 5.518 o
3 4 4 386.483 437.416 23.981 29.899 o
3 4 5 604.713 642.357 18.439 22.846 o
3 4 6 299.562 302.279 13.556 56.822 o
3 4 7 2280.860 2139.450 49.942 2.884 o
3 4 8 263.854 279.733 15.545 57.888 o
3 4 9 474.685 437.821 22.517 27.921 o
3 5 0 2208.980 2079.910 35.209 3.322 o
3 5 1 60.167 69.628 12.035 177.309 o
3 5 2 20.625 36.370 6.865 508.040 o
3 5 3 1424.230 1381.600 29.940 6.593 o
3 5 4 1765.690 1843.290 44.018 4.132 o
3 5 5 2014.200 1961.820 41.190 3.619 o
3 5 6 1559.840 1485.680 33.482 5.649 o
3 5 7 261.299 291.380 15.184 58.404 o
3 5 8 49.658 72.202 12.021 184.791 o
3 5 9 47.246 24.368 11.752 215.270 o
3 6 0 854.253 819.420 16.582 15.766 o
3 6 1 30.184 34.091 6.675 478.163 o
3 6 2 3111.250 2987.830 58.325 1.701 o
3 6 3 24.399 58.027 11.022 243.662 o
3 6 4 249.887 322.054 14.425 59.821 o
3 6 5 298.806 320.339 13.052 56.861 o
3 6 6 1032.340 1001.700 35.304 9.330 o
3 6 7 646.355 619.107 19.428 21.556 o
3 6 8 1676.060 1575.970 48.679 4.431 o
3 6 9 132.828 133.460 13.949 104.388 o
3 7 0 1866.900 1805.040 31.172 4.371 o
3 7 1 134.827 164.715 15.777 87.674 o
3 7 2 299.241 327.450 18.509 45.586 o
3 7 3 137.134 158.676 18.571 72.864 o
3 7 4 3222.960 3065.120 59.963 1.605 o
3 7 5 38.396 45.192 8.895 308.377 o
3 7 6 1170.620 1143.020 27.736 8.843 o
3 7 7 189.136 208.729 12.554 87.028 o
3 7 8 3.502 36.803 17.228 130.055 o
3 7 9 302.798 281.155 19.220 45.773 o
3 8 0 8.448 27.539 6.560 661.783 o
3 8 1 1690.440 1579.830 30.484 5.196 o
3 8 2 1503.320 1525.330 32.978 5.806 o
3 8 3 1627.340 1600.480 31.427 5.325 o
3 8 4 2.211 21.488 13.258 219.722 o
3 8 5 156.906 196.080 14.690 85.375 o
3 8 6 210.312 203.074 11.751 86.175 o
3 8 7 1134.970 1074.810 27.426 9.378 o
3 8 8 296.656 256.915 14.068 58.864 o
3 8 9 312.567 331.005 24.650 34.507 o
3 9 0 539.043 521.354 17.378 27.737 o
3 9 1 152.585 161.967 16.897 78.281 o
3 9 2 115.623 113.045 10.491 147.845 o
3 9 3 2209.520 2206.640 45.643 3.021 o
3 9 4 42.855 45.738 8.469 315.363 o
3 9 5 3670.820 3582.780 69.554 1.238 o
3 9 6 343.409 333.718 13.984 49.481 o
3 9 7 286.239 293.349 14.209 57.557 o
3 9 8 1.920 6.916 10.132 382.868 o
3 10 0 300.739 312.392 13.642 55.889 o
3 10 1 2196.300 2094.440 46.027 3.109 o
3 10 2 270.229 274.339 10.691 69.913 o
3 10 3 1796.210 1756.250 37.909 4.383 o
3 10 4 149.793 169.788 9.661 123.093 o
3 10 5 136.810 158.569 10.761 123.001 o
3 10 6 370.210 351.359 14.482 45.433 o
3 10 7 1535.410 1387.520 33.028 5.940 o
3 10 8 370.148 344.983 17.163 41.765 o
3 11 0 376.008 366.826 14.683 44.016 o
3 11 1 2574.280 2512.530 57.757 2.253 o
3 11 2 781.702 779.155 20.346 16.515 o
3 11 3 32.599 49.331 10.636 250.812 o
3 11 4 2901.140 2790.410 51.228 1.963 o
3 11 5 356.425 364.174 15.272 44.888 o
3 11 6 1227.420 1171.710 28.693 8.281 o
3 11 7 9.100 27.142 10.429 320.255 o
3 11 8 152.110 158.894 14.378 92.635 o
3 12 0 335.748 314.443 16.331 47.047 o
3 12 1 449.622 464.476 17.203 33.202 o
3 12 2 2775.960 2621.020 52.601 2.108 o
3 12 3 293.583 285.405 15.246 54.814 o
3 12 4 744.778 747.955 18.923 17.926 o
3 12 5 16.228 20.927 8.680 417.752 o
3 12 6 594.137 581.514 18.581 24.024 o
3 12 7 1.343 0.996 9.568 440.840 o
3 12 8 772.466 765.642 23.375 15.941 o
3 13 0 1595.360 1453.280 36.775 5.411 o
3 13 1 22.608 34.056 9.406 333.961 o
3 13 2 0.138 13.531 11.350 304.775 o
3 13 3 9.702 9.261 7.490 601.256 o
3 13 4 1034.570 1064.600 22.096 10.938 o
3 13 5 532.923 517.062 17.144 28.223 o
3 13 6 694.923 669.046 20.249 19.413 o
3 13 7 54.071 78.134 10.851 202.622 o
3 13 8 300.100 295.636 18.184 47.452 o
3 14 0 4.482 14.660 9.247 429.672 o
3 14 1 355.564 358.621 17.923 41.199 o
3 14 2 158.461 167.792 12.224 102.899 o
3 14 3 912.300 868.130 22.978 13.255 o
3 14 4 223.484 227.085 11.024 83.123 o
3 14 5 26.589 38.175 8.435 369.695 o
3 14 6 137.400 122.741 11.125 127.686 o
3 14 7 545.612 532.368 19.171 26.128 o
3 14 8 191.025 188.119 13.758 83.355 o
3 15 0 252.129 236.825 16.324 59.860 o
3 15 1 1534.670 1509.550 38.776 5.408 o
3 15 2 355.217 354.706 16.324 43.777 o
3 15 3 57.915 68.823 9.899 225.513 o
3 15 4 48.257 48.154 8.505 299.582 o
3 15 5 946.418 943.498 29.203 11.278 o
3 15 6 51.970 48.097 8.941 277.080 o
3 15 7 10.936 15.352 10.339 334.338 o
3 16 0 35.125 80.066 17.592 108.900 o
3 16 1 2186.450 2090.550 50.683 3.022 o
3 16 2 375.583 345.163 17.236 41.265 o
3 16 3 2554.660 2542.630 60.615 2.216 o
3 16 4 83.543 79.690 10.336 184.746 o
3 16 5 9.521 0.353 7.739 602.798 o
3 16 6 4.304 7.427 8.664 501.540 o
3 16 7 538.660 537.090 17.337 27.470 o
3 17 0 1952.140 1842.490 54.542 3.435 o
3 17 1 235.479 262.336 15.707 62.156 o
3 17 2 275.646 278.680 15.705 56.166 o
3 17 3 571.031 577.124 21.701 23.086 o
3 17 4 150.602 185.281 12.140 103.151 o
3 17 5 504.188 497.751 16.082 30.637 o
3 17 6 90.053 103.632 20.788 72.402 o
3 17 7 0.422 11.864 9.631 418.291 o
3 18 0 325.313 338.614 20.375 40.101 o
3 18 1 294.747 274.479 15.232 55.330 o
3 18 2 1429.580 1400.660 37.947 6.008 o
3 18 3 142.998 149.992 13.679 100.781 o
3 18 4 519.127 510.530 22.487 25.172 o
3 18 5 0.116 0.100 8.496 567.337 o
3 18 6 377.768 371.002 15.989 41.916 o
3 18 7 41.137 30.884 10.072 271.224 o
3 19 0 756.024 728.988 29.680 14.569 o
3 19 1 223.485 201.811 17.451 62.224 o
3 19 2 0.766 4.762 11.072 327.638 o
3 19 3 91.732 86.043 12.308 147.290 o
3 19 4 1302.630 1356.650 37.987 6.596 o
3 19 5 1.217 -3.707 9.263 472.603 o
3 19 6 610.306 608.900 35.246 15.353 o
3 20 0 183.023 187.075 17.767 67.520 o
3 20 1 282.195 274.043 19.657 46.806 o
3 20 2 789.744 783.866 26.365 14.687 o
3 20 3 351.794 384.036 18.780 39.357 o
3 20 4 77.653 104.900 13.480 134.996 o
3 20 5 0.360 3.653 10.448 369.681 o
3 20 6 695.659 670.804 21.798 18.798 o
3 21 0 55.086 50.949 15.310 133.702 o
3 21 1 61.050 91.901 15.752 118.359 o
3 21 2 292.930 295.662 17.253 49.998 o
3 21 3 402.244 394.257 19.463 35.201 o
3 21 4 450.528 460.083 20.770 29.977 o
3 21 5 1507.140 1483.410 36.684 5.660 o
3 21 6 217.563 235.574 14.640 70.246 o
3 22 0 2.372 14.476 15.191 171.779 o
3 22 1 577.635 560.783 27.240 20.065 o
3 22 2 45.219 60.195 15.833 128.972 o
3 22 3 615.797 629.147 24.428 19.889 o
3 22 4 4.867 26.515 12.877 226.398 o
3 22 5 2.821 25.824 13.696 204.210 o
3 23 0 176.330 222.572 19.797 58.773 o
3 23 1 4.933 9.958 15.033 175.088 o
3 23 2 6.439 6.223 14.848 179.556 o
3 23 3 320.918 363.513 19.330 41.244 o
3 23 4 565.701 605.735 24.474 21.313 o
3 23 5 1272.820 1295.170 38.582 6.807 o
3 24 0 333.052 280.098 21.936 38.903 o
3 24 1 8.346 5.148 15.026 174.607 o
3 24 2 1099.180 1104.480 41.134 7.828 o
3 24 3 106.409 114.261 14.799 108.838 o
3 24 4 49.830 81.467 14.527 139.923 o
3 25 0 557.302 596.212 31.136 18.102 o
3 25 1 6.683 2.194 15.732 161.520 o
3 25 2 7.154 8.494 16.097 152.688 o
3 25 3 176.788 218.932 27.297 39.093 o
3 25 4 854.844 912.639 31.449 11.884 o
3 26 0 109.195 122.424 19.135 77.171 o
3 26 1 321.170 323.198 24.775 34.115 o
3 26 2 612.773 633.615 31.259 16.805 o
3 26 3 164.340 189.755 20.675 58.817 o
3 27 0 533.717 551.327 30.337 19.372 o
3 27 1 97.471 138.257 20.166 72.239 o
3 27 2 62.436 50.122 18.201 99.959 o
3 28 0 5.232 -2.377 21.393 88.802 o
3 28 1 321.330 382.030 26.528 30.602 o
4 0 0 2389.070 2398.000 74.974 2.175 o
4 0 2 1199.700 1297.740 46.311 6.403 o
4 0 4 23.825 88.878 16.733 120.416 o
4 0 6 1547.940 1609.180 58.562 4.187 o
4 1 0 150.732 136.578 25.344 47.514 o
4 1 1 103.250 106.313 12.041 138.996 o
4 1 2 677.001 690.907 21.151 19.230 o
4 1 3 712.679 762.659 23.071 17.104 o
4 1 4 1410.810 1481.570 37.422 5.962 o
4 1 5 333.989 378.446 17.261 43.051 o
4 1 6 232.604 305.457 16.942 56.419 o
4 2 0 406.564 395.912 16.778 38.078 o
4 2 1 2248.200 2288.280 51.248 2.807 o
4 2 2 69.006 71.270 10.199 204.949 o
4 2 3 182.925 235.192 18.462 61.803 o
4 2 4 44.296 88.014 25.017 58.132 o
4 2 5 423.774 460.275 18.772 33.112 o
4 2 6 531.830 544.931 21.205 25.071 o
4 3 0 4.029 25.347 8.567 468.553 o
4 3 1 30.501 134.308 16.317 115.429 o
4 3 2 24.255 44.712 10.578 268.923 o
4 3 3 1473.260 1512.960 37.368 5.687 o
4 3 4 44.457 51.755 10.482 237.726 o
4 3 5 471.045 478.652 19.180 30.101 o
4 3 6 32.013 54.746 21.175 81.931 o
4 4 0 528.185 560.296 19.731 25.890 o
4 4 1 1705.390 1746.500 48.002 4.209 o
4 4 2 467.982 498.344 17.875 30.893 o
4 4 3 113.961 138.974 16.887 88.182 o
4 4 4 6.104 28.978 9.574 375.701 o
4 4 5 413.228 437.647 18.388 34.647 o
4 4 6 89.406 110.660 13.057 133.159 o
4 5 0 298.976 343.237 19.552 43.107 o
4 5 1 326.915 335.512 23.855 34.854 o
4 5 2 370.914 404.677 16.061 41.090 o
4 5 3 23.297 25.659 9.338 346.426 o
4 5 4 915.964 976.054 37.414 9.907 o
4 5 5 22.961 42.523 10.967 258.393 o
4 5 6 115.140 158.036 19.955 69.486 o
4 6 0 772.900 812.401 28.038 14.258 o
4 6 1 13.000 30.427 9.804 340.957 o
4 6 2 436.930 436.956 19.981 31.836 o
4 6 3 40.889 55.496 10.998 225.360 o
4 6 4 165.862 191.651 12.181 97.324 o
4 6 5 10.832 1.358 10.306 353.931 o
4 6 6 1037.030 1052.080 30.744 9.780 o
4 7 0 820.426 853.351 42.538 10.034 o
4 7 1 24.737 32.915 11.867 232.338 o
4 7 2 159.657 159.293 12.317 103.273 o
4 7 3 475.346 502.645 16.897 31.249 o
4 7 4 339.261 347.021 14.907 47.710 o
4 7 5 70.384 90.984 11.618 169.178 o
4 7 6 58.424 85.658 13.091 155.317 o
4 8 0 751.010 802.310 28.267 14.560 o
4 8 1 451.873 444.724 26.350 25.335 o
4 8 2 458.841 493.630 16.971 32.206 o
4 8 3 39.615 71.805 18.568 99.486 o
4 8 4 88.100 121.541 11.815 145.679 o
4 8 5 706.783 782.582 24.533 16.552 o
4 8 6 574.147 591.580 22.329 22.448 o
4 9 0 40.345 67.483 38.754 26.166 o
4 9 1 2.345 26.522 14.329 187.754 o
4 9 2 218.035 215.468 15.755 67.824 o
4 9 3 781.081 800.944 22.752 15.685 o
4 9 4 47.795 70.385 11.545 197.128 o
4 9 5 611.307 650.252 20.982 21.364 o
4 9 6 0.117 12.645 11.245 311.146 o
4 10 0 6.125 13.745 15.266 168.127 o
4 10 1 427.943 395.933 19.884 33.353 o
4 10 2 197.426 196.893 16.623 69.160 o
4 10 3 51.168 107.197 12.141 168.355 o
4 10 4 0.561 25.452 11.608 281.064 o
4 10 5 368.799 389.199 16.468 41.251 o
4 10 6 2.756 -8.521 10.634 355.578 o
4 11 0 851.132 870.854 38.538 10.582 o
4 11 1 9.086 33.512 18.140 116.844 o
4 11 2 52.688 110.093 56.529 12.454 o
4 11 3 285.103 292.598 21.513 42.235 o
4 11 4 246.636 228.074 13.595 69.567 o
4 11 5 559.897 576.511 19.804 24.519 o
4 12 0 932.150 979.786 42.419 8.926 o
4 12 1 260.046 276.572 17.738 53.023 o
4 12 2 1460.740 1459.260 93.259 2.860 o
4 12 3 155.288 167.237 13.867 93.807 o
4 12 4 108.350 152.763 17.708 82.870 o
4 12 5 14.511 21.772 12.709 223.910 o
4 13 0 47.740 76.428 18.182 100.493 o
4 13 1 12.268 27.935 17.588 123.661 o
4 13 2 1219.710 1341.130 53.676 5.618 o
4 13 3 59.676 77.231 12.389 168.625 o
4 13 4 1409.070 1373.250 38.560 6.094 o
4 13 5 29.290 49.220 11.652 224.057 o
4 14 0 1072.530 1012.870 43.831 7.854 o
4 14 1 561.792 611.746 27.999 19.463 o
4 14 2 455.329 462.127 33.289 19.950 o
4 14 3 82.882 140.982 22.156 64.335 o
4 14 4 10.096 32.171 12.736 222.222 o
4 14 5 306.440 351.112 16.816 47.135 o
4 15 0 13.614 47.906 24.138 66.704 o
4 15 1 100.520 156.415 18.068 81.856 o
4 15 2 56.605 55.199 13.098 165.720 o
4 15 3 2020.670 2176.720 79.216 2.477 o
4 15 4 45.417 54.076 15.907 129.124 o
4 16 0 40.952 54.412 33.089 35.510 o
4 16 1 1303.870 1329.410 45.271 6.054 o
4 16 2 173.672 176.450 19.233 63.773 o
4 16 3 291.360 358.316 41.356 17.998 o
4 16 4 5.324 30.454 17.013 133.671 o
4 17 0 16.685 41.972 21.858 80.395 o
4 17 1 14.329 50.166 16.800 129.679 o
4 17 2 278.352 291.031 22.191 41.459 o
4 17 3 585.860 625.087 28.950 18.390 o
4 17 4 932.936 912.241 61.752 6.304 o
4 18 0 496.314 511.525 32.949 18.959 o
4 18 1 1.276 29.961 16.648 141.019 o
4 18 2 536.114 572.703 37.192 15.727 o
4 18 3 18.001 17.083 27.091 54.229 o
4 19 0 131.561 125.490 22.122 60.177 o
4 19 1 40.869 29.940 19.648 94.282 o
4 19 2 250.471 254.211 22.408 44.064 o
4 20 0 69.824 106.445 45.157 19.049 o
4 20 1 795.595 839.647 35.944 11.780 o
4 20 2 171.332 219.616 25.862 42.444 o
4 21 0 76.402 77.216 39.089 25.102 o
;
_iucr_refine_instructions_details
;
TITL let0507b in P2(1)/c
CELL 0.71073 3.9773 28.4765 9.5781 90 91.242 90
ZERR 4 0.0003 0.0024 0.0009 0 0.001 0
LATT 1
SYMM -X,0.5+Y,0.5-Z
SFAC C H Cl N O Se
UNIT 32 44 4 8 8 4
EQIV $1 +X,1.5-Y,-0.5+Z
EQIV $2 1+X,1.5-Y,0.5+Z
DFIX 1.085 C7 H7 C3 H3 C4 H4 C6 H6
DFIX 1.04 N1 H1b N2 H2b N2 H2a N1 H1a
RIGU C7 H7
RIGU C6 H6
RIGU C3 H3
RIGU C4 H4
SIMU H8b H8f H8c H8d H8a H8e
RIGU N2 H2a
RIGU N2 H2b
RIGU N1 H1a
RIGU N1 H1b
SADI 0.01 C8 H8d C8 H8e C8 H8f
ISOR 0.01 0.02 H8e H8b H8f H8c H8a H8d
ISOR 0.01 0.02 H1b H1a H2b H2a
ISOR 0.01 0.02 H7 H3 H4 H6
SADI 0.04 H8a H8b H8a H8c H8b H8c
SADI 0.04 H8d H8e H8d H8f H8e H8f

L.S. 8
PLAN  5
SIZE 0.12 0.3 0.36
TEMP -80
CONF
HTAB N2 O1_$1
HTAB N1 O1
HTAB N1 O2_$2
HTAB N2 O2
ACTA
BOND
FMAP 2
AFIX
MORE -1
BOND $H
WGHT 0.042308 1.253981
FVAR 0.386193
REM <olex2.extras>
REM <HklSrc "%.\\let0507b.hkl">
REM </olex2.extras>

Se1   6    -0.39680  0.66910  0.84402  11.00000  0.02549  0.02728  0.01919 =
 -0.00001 -0.00245 -0.00038
Cl1   3    -0.09545  0.60414  0.77105  11.00000  0.03990  0.03151  0.06231 =
 -0.01464 -0.01000  0.00429
O1    5    -0.11586  0.69502  0.94624  11.00000  0.04716  0.03085  0.01864 =
 -0.00267 -0.01011 -0.00345
O2    5    -0.41095  0.70083  0.70249  11.00000  0.04815  0.03426  0.02033 =
 0.00410 -0.01216 -0.00297

N1    4     0.19399  0.78641  0.95331  11.00000  0.04989  0.03086  0.01808 =
 0.00356 -0.00629 -0.00597
H1a   2     0.31466  0.80259  1.03847  11.00000  0.04215  0.04797  0.01708 =
 -0.00082  0.00187 -0.01405
H1b   2     0.07523  0.75372  0.96486  11.00000  0.03753  0.02781  0.02025 =
 0.00199 -0.00241  0.00005
N2    4    -0.02630  0.78890  0.73214  11.00000  0.03735  0.02531  0.02055 =
 -0.00079 -0.00597 -0.00078
H2a   2    -0.07766  0.80470  0.63728  11.00000  0.05515  0.06310  0.03331 =
 0.01801 -0.01009 -0.00157
H2b   2    -0.12324  0.75509  0.73810  11.00000  0.04413  0.02665  0.03541 =
 -0.00237 -0.00001 -0.00311
C1    1     0.14881  0.80911  0.83386  11.00000  0.02863  0.02418  0.01429 =
 0.00005 -0.00095  0.00133
C2    1     0.29205  0.85623  0.81379  11.00000  0.02643  0.02536  0.01537 =
 0.00031  0.00208  0.00076
C3    1     0.29292  0.87678  0.68061  11.00000  0.03938  0.03067  0.02051 =
 0.00219  0.00103 -0.00193
H3    2     0.18115  0.85848  0.59208  11.00000  0.05892  0.05873  0.03287 =
 -0.01010 -0.00285 -0.01151
C4    1     0.42666  0.92111  0.66212  11.00000  0.04738  0.02994  0.03343 =
 0.00676  0.00283 -0.00320
H4    2     0.41287  0.93541  0.55768  11.00000  0.06888  0.05462  0.03955 =
 0.01659  0.00298 -0.00135
C5    1     0.56972  0.94615  0.77358  11.00000  0.03154  0.02830  0.04490 =
 0.00216  0.00439  0.00045
C6    1     0.56924  0.92565  0.90552  11.00000  0.04868  0.03120  0.03922 =
 -0.00458 -0.00942 -0.00547
H6    2     0.68024  0.94627  0.98951  11.00000  0.05553  0.05807  0.04608 =
 -0.01623 -0.00502 -0.01558
C7    1     0.43337  0.88147  0.92527  11.00000  0.04663  0.02930  0.02477 =
 -0.00247 -0.00749 -0.00437
H7    2     0.43597  0.86769  1.03160  11.00000  0.06754  0.04514  0.02930 =
 0.00322 -0.00897 -0.00976
C8    1     0.71198  0.99421  0.75194  11.00000  0.04312  0.03087  0.07497 =
 0.00252  0.00150 -0.00434
PART 1
H8a   2     0.84372  1.00704  0.86291  10.50000  0.07253  0.07344  0.07411 =
 -0.00081 -0.00110 -0.00225
H8b   2     0.92692  0.99648  0.65949  10.50000  0.04814  0.04426  0.05026 =
 -0.00185  0.00032  0.00129
H8c   2     0.48678  1.02095  0.71777  10.50000  0.04545  0.03423  0.04698 =
 -0.00504 -0.00315  0.00090
PART 2
H8d   2     0.58435  1.02037  0.78586  10.50000  0.05565  0.05189  0.05645 =
 -0.00069  0.00009  0.00233
H8e   2     0.94499  0.99548  0.78199  10.50000  0.02027  0.03566  0.02000 =
 0.00339  0.00307 -0.00171
H8f   2     0.72189  0.99722  0.65153  10.50000  0.05619  0.06091  0.06106 =
 0.00515  0.00069 -0.00171
HKLF 4

END
Q1 1 -0.4 0.635417 0.84375 11 0.05 1.06
Q2 1 -0.4 0.697917 0.84375 11 0.05 0.98

  REM The information below was added by Olex2.
  REM
  REM R1 = 0.0339 for 1967 Fo > 4sig(Fo) and 0.0393 for all 2194 data
  REM 253 parameters refined using 143 restraints
  REM Highest difference peak 1.0604, deepest hole -0.7677
  REM Mean Shift 0.0000, Max Shift 0.0010.

  REM +++ Tabular Listing of Refinement Information +++
  REM R1_all = 0.0393
  REM R1_gt = 0.0339
  REM wR_ref = 0.0827
  REM GOOF = 1.1032
  REM Shift_max = 0.0010
  REM Shift_mean = 0.0000
  REM Reflections_all = 2194
  REM Reflections_gt = 1967
  REM Parameters = 253
  REM Hole = -0.7677
  REM Peak = 1.0604
  REM Flack = n/a

  
;
_olex2_submission_special_instructions  'No special instructions were received'
loop_
  _restr_distance_atom_site_label_1
  _restr_distance_atom_site_label_2
  _restr_distance_site_symmetry_2
  _restr_distance_target
  _restr_distance_target_weight_param
  _restr_distance_diff
 N1 H1a 1 1.0400 0.0200 -0.0045
 N1 H1b 1 1.0400 0.0200 -0.0108
 N2 H2a 1 1.0400 0.0200 0.0096
 N2 H2b 1 1.0400 0.0200 0.0007
 C3 H3 1 1.0850 0.0200 0.0024
 C4 H4 1 1.0850 0.0200 0.0047
 C6 H6 1 1.0850 0.0200 0.0027
 C7 H7 1 1.0850 0.0200 -0.0062

loop_
  _restr_equal_distance_atom_site_label_1
  _restr_equal_distance_atom_site_label_2
  _restr_equal_distance_site_symmetry_2
  _restr_equal_distance_class_id
 C8 H8d 1 1
 C8 H8e 1 1
 C8 H8f 1 1
 H8a H8b 1 2
 H8a H8c 1 2
 H8b H8c 1 2
 H8d H8e 1 3
 H8d H8f 1 3
 H8e H8f 1 3

loop_
  _restr_equal_distance_class_class_id
  _restr_equal_distance_class_target_weight_param
  _restr_equal_distance_class_average
  _restr_equal_distance_class_esd
  _restr_equal_distance_class_diff_max
 1 0.0100 0.9647 0.0022 0.0028
 2 0.0400 1.9956 0.0140 0.0197
 3 0.0400 1.5581 0.0341 0.0430

loop_
  _restr_RIGU_atom_site_label_1
  _restr_RIGU_atom_site_label_2
  _restr_RIGU_target_weight_param
  _restr_RIGU_U13_diff
  _restr_RIGU_U23_diff
  _restr_RIGU_U33_diff
 N1 H1a 0.004000 0.000928 0.000643 -0.000653
 N1 H1b 0.004000 -0.000719 0.000075 0.000159
 N2 H2a 0.004000 -0.000966 -0.000263 -0.002029
 N2 H2b 0.004000 -0.000177 -0.000169 -0.000442
 C3 H3 0.004000 -0.000019 0.001190 -0.001786
 C4 H4 0.004000 -0.000407 -0.000434 -0.001874
 C6 H6 0.004000 0.000998 -0.001014 -0.001615
 C7 H7 0.004000 0.000111 -0.000556 -0.002170

loop_
  _restr_U_iso_atom_site_label
  _restr_U_iso_weight_param
 H1a 0.0200
 H1b 0.0200
 H2a 0.0200
 H2b 0.0200
 H3 0.0200
 H4 0.0200
 H6 0.0200
 H7 0.0200
 H8a 0.0200
 H8b 0.0200
 H8c 0.0200
 H8d 0.0200
 H8e 0.0200
 H8f 0.0200

loop_
  _restr_U_similar_atom_site_label_1
  _restr_U_similar_atom_site_label_2
  _restr_U_similar_weight_param
 H8a H8e 0.0800
 H8b H8f 0.0800
 H8c H8d 0.0800
